# Supplementary material for: Direct N-glycosylation of tosyl and nosyl carbamates with trichloroacetimidate donors
Source: Royal Society of Chemistry journal article supplement (doi:10.1039/d1nj02051j), 2021-01-01

## Supporting Information

### Direct *N*-Glycosylation of Tosyl- and Nosyl Carbamates with Trichloroacetimidate Donors

Ariza Khanam,<sup>a</sup> Pintu Kumar Mandal<sup>a,b,\*</sup>

<sup>a</sup>*Medicinal and Process Chemistry Division, CSIR-Central Drug Research Institute, BS-10/1, Sector 10, Jankipuram extension, Sitapur Road, P.O. Box 173, Lucknow, 226 031, India.*

<sup>b</sup>*Academy of Scientific and Innovative Research (AcSIR), Ghaziabad- 201002, India*

\* Corresponding author; Email: [pintuchem06@gmail.com](mailto:pintuchem06@gmail.com)/[pk.mandal@cdri.res.in](mailto:pk.mandal@cdri.res.in)

## TABLE OF CONTENTS

1. Experimental section
2. Characterization data of Glycofuranosyl TCA donors (**1a**, **1e $\alpha$** , **1e $\alpha$  $\beta$** )
3. Characterization data of Carbamates derivatives (**2a-2j**)
4. Characterization data of synthesized N-glycofuranosides (**3a-3z**, **3v'**, **3aa**, **4**, **5**, **6**)
5. Spectral data of **1a**, **1e $\alpha$** , **1e $\alpha$  $\beta$**
6. Spectral data of **2a**, **2b**, **2d**, **2e**, **2f**, **2g**, **2h**, **2i**, **2j**
7. Confirmation the exact structure **3a** by NMR (**NOESY correlation data**) and Spectra Data, HRMS of all the synthesized *N*-glycofuranosides (**3a-3z**, **3v'**, **3aa**)
8. Spectra Data, HRMS of compounds **4**, **5**, **6**

## 1. EXPERIMENTAL SECTION

**General Information.** All reactions were carried out under an argon atmosphere with dry solvents under anhydrous conditions in oven dried round-bottom flasks, unless otherwise noted. Reagents were purchased at the highest commercial quality available and used without further purification, unless otherwise stated. Reactions were monitored by thin-layer chromatography (TLC) carried out on 0.25 mm E. Merck silica gel plates (60F-254) using UV light as the visualizing agent also by warming ceric sulfate [2% Ce(SO<sub>4</sub>)<sub>2</sub> in 5% H<sub>2</sub>SO<sub>4</sub> in EtOH]-sprayed plates on a hot plate. Silica gel 230-400 mesh was used for column chromatography. All NMR spectra were recorded with Bruker DRX 400 MHz spectrometer (400 MHz for <sup>1</sup>H, 100 MHz for <sup>13</sup>C) at ambient temperature using CDCl<sub>3</sub>, CD<sub>3</sub>OD or (CD<sub>3</sub>)<sub>2</sub>CO as solvents. Chemical shifts δ are given in ppm relative to the residual signals of tetramethylsilane in CDCl<sub>3</sub> for <sup>1</sup>H and <sup>13</sup>C NMR. Coupling constants are given in hertz. High-resolution mass spectra (HRMS) were recorded as ESI-HRMS on Q-TOF mass spectrometer. Either protonated molecular ions [M + H]<sup>+</sup>, sodium adducts [M + Na]<sup>+</sup>, or ammonium adducts [M + NH<sub>4</sub>]<sup>+</sup> were used for empirical formula confirmation. Commercially available grades of organic solvents are used for column chromatography for purifications.

### 2. Glycofuranosyl TCA donors: Glycofuranosyl TCA donors (1a, 1ea, 1eab)

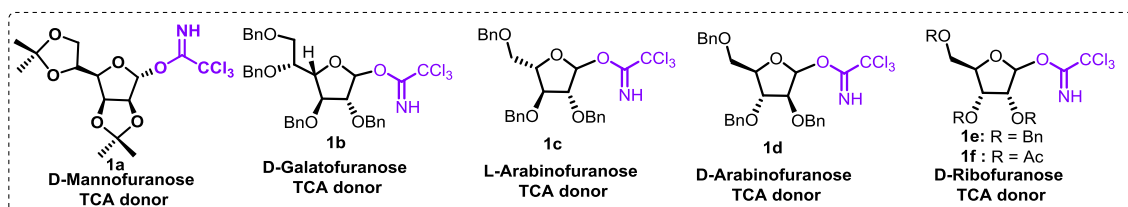

Ref.

1. Pirat, J.L.; Virieux, D.; Clarion, L.; Volle, J.N.; Bakalara, N.; Mersel, M.; Montbrun, J.; Cristau, H.J. New phosphorus containing heterocyclic compounds, sugar analogues, and compositions having anti-cancer activity containing the same. WO 2009004096 A1, **2009**.

2. Donadio, L. G. ; Gola, G.; Lederkremer, R. M. D.; Rodriguez, C. G. Synthesis of  $\alpha$ -D-Galf-(1 $\rightarrow$ 2)-D-galactitol and  $\alpha$ -D-Galf-(1 $\rightarrow$ 2)[ $\beta$ -D-Galf-(1 $\rightarrow$ 3)]-D-galactitol, oligosaccharide derivatives from *Bacteroides cellulosolvens* glycoproteins. *Carbohydr. Res.* **2006**, *341*, 2487–2497.
3. Su, Y.; Xie, J.; Wang, Y.; Hub, X.; fu, X. Lin Synthesis and antitumor activity of new shikonin glycosides. *Eur. J. Med.Chem.* **2010**, *45*, 2713–2718.
4. Luo, Y.; Zechel, D. L. A. concise synthesis of  $\alpha$ -D-ribofuranosyl alkylphosphonates - Putative substrate intermediates for the carbon–phosphorous lyase system. *Can. J. Chem.* **2006**, *84*, 743–747
5. J.L. Pirat, D. Virieux, L. Clarion, J.N. Volle, N. Bakalara, M. Mersel, J. Montbrun, H.J. Cristau, New phosphorus containing heterocyclic compounds, sugar analogues, and compositions having anti-cancer activity containing the same. WO 2009004096 A1, **2009**.
6. L. G. Donadio, G. Gola, R. M. D. Lederkremer, C. G. Rodriguez, *Carbohydr. Res.* **2006**, *341*, 2487–2497.
7. Y. Su, J. Xie, Y. Wang, X. Hub, X. fu, *Eur. J. Med.Chem.* **2010**, *45*, 2713–2718.
8. Y. Luo, D. L. A. Zechel, *Can. J. Chem.* **2006**, *84*, 743–747.

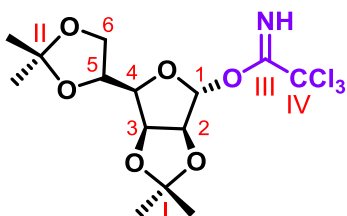

**2,3:5,6-Di-O-isopropylidene- $\alpha$ -D-mannofuranosyl trichloroacetamidate (1a).**<sup>5</sup> To a solution of compound 2,3:5,6-di-O-isopropylidene- $\alpha$ -D-mannofuranose (1.00 g, 3.84 mmol) and trichloroacetonitrile (3.85 mL, 38.4 mmol) in  $\text{CH}_2\text{Cl}_2$  (30 mL) was added sodium hydride (0.11 g, 4.6 mmol) and the reaction mixture was stirred for 1 h at room temperature. After that, the mixture was filtered through Celite, and the filtrate was evaporated under reduced pressure to give colored oil. This oil was triturated with hexane to give a white solid precipitate. The precipitate was removed by filtration, and the solvent was removed from the filtrate. The resulting oil crystallized spontaneously to give pure trichloroacetamidate **1a**



(1.13 g, 73 %) as a white solid.  $^1\text{H}$  NMR (400 MHz,  $\text{CDCl}_3$ ):  $\delta$  8.61 (s, 1 H, NH), 6.26 (s, 1 H, H-1), 4.91 (dd,  $J = 3.4, 5.9$  Hz, 1 H, H-3), 4.86 (d,  $J = 5.9$  Hz, 1 H, H-2), 4.46-4.41 (m, 1 H, H-5), 4.14-4.10 (m, 2 H, H-4, H-6<sub>b</sub>), 4.04 (dd,  $J = 4.2, 8.9$ , H-6<sub>a</sub>), 1.51 (s, 3 H,  $\text{CH}_3$ ), 1.45 (s, 3 H,  $\text{CH}_3$ ), 1.38 (s, 3 H,  $\text{CH}_3$ ), 1.37 (s, 3 H,  $\text{CH}_3$ );  $^{13}\text{C}$  NMR (100 MHz,  $\text{CDCl}_3$ ):  $\delta$  160.7 (CqNH-III), 113.5 (Cq-I), 109.5 (Cq-II), 104.8 (C-1), 91.0 (Cq-IV<sup>CCl<sub>3</sub></sup>), 84.8 (C-2), 82.9 (C-4), 79.3 (C-3), 72.7 (C-5), 67.1 (C-6), 26.9 ( $\text{CH}_3$ ), 26.0 ( $\text{CH}_3$ ), 25.1 ( $\text{CH}_3$ ), 24.8 ( $\text{CH}_3$ ).

Compounds **1b**—**1e** were prepared according to the literature procedures.<sup>6-8</sup>

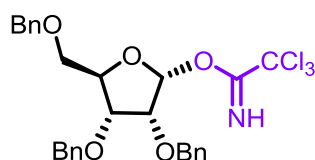

### 2,3,5-Tri-*O*-benzyl- $\alpha$ -D-ribofuranosyl Trichloroacetimidate (**1 $\alpha$** )

To a stirred solution of compound 2,3,5-tri-*O*-benzyl-D-ribofuranose (500 mg, 1.19 mmol) in  $\text{CH}_2\text{Cl}_2$  (15 mL), trichloroacetonitrile (1.2 mL, 11.9 mmol) followed by 1,8-diaz abicyclo[5.4.0]undec-7-ene (DBU; 80  $\mu\text{L}$ , 0.53 mmol) were added successively at 0°C. The resulting mixture was stirred for 1 h at room temperature. Thereafter, the mixture was evaporated under reduced pressure to give light colored oil. The resulting oil was purified by silica to give pure trichloroacetimidate **1 $\alpha$**  (495 mg, 88 %) as a white solid.  $^1\text{H}$  NMR (400 MHz,  $\text{CDCl}_3$ ):  $\delta$  8.64 (s, 1 H, NH), 7.39-7.38 (m, 2 H, Ar), 7.35-7.27 (m, 13 H, Ar), 6.20 (d,  $J = 6.8$  Hz, 1 H, H-1), 4.79 (dd,  $J = 11.8$  Hz, 3 H,  $\text{PhCH}_2$ ), 4.68 (d,  $J = 12.3$  Hz, 1 H,  $\text{PhCH}_2$ ), 4.58 (dd,  $J = 12.3$  Hz, 2 H,  $\text{PhCH}_2$ ), 4.08-4.06 (m, 1 H), 4.03 (dd,  $J = 8.2, 11.3$  Hz, 1 H), 3.88 (d,  $J = 4.1, 11.3$  Hz, 1 H), 3.64-3.61 (m, 1 H), 3.57 (d,  $J = 2.9, 6.7$  Hz, 1 H);  $^{13}\text{C}$  NMR (100 MHz,

CDCl<sub>3</sub>):  $\delta$  161.1 (Cq, C=NH), 138.6, 138.1, 138.0, 128.5, 128.4, 128.3, 127.9, 127.8, 127.7, 127.6, 127.5, 97.0 (C-1), 91.1 (Cq<sup>CCl<sub>3</sub></sup>), 76.5, 74.7, 74.2, 73.5, 72.9, 71.6, 63.4, (C-5).

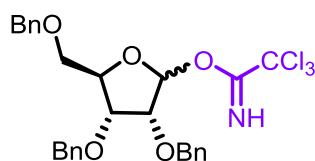

### 2,3,5-Tri-*O*-benzyl- $\alpha/\beta$ -D-ribofuranosyl Trichloroacetimidate (**1e $\alpha\beta$** )

To a stirred solution of compound 2,3,5-tri-*O*-benzyl-D-ribofuranose (500 mg, 1.19 mmol) in CH<sub>2</sub>Cl<sub>2</sub> (15 mL), trichloroacetonitrile (1.2 mL, 11.9 mmol) followed by K<sub>2</sub>CO<sub>3</sub> (328 mg, 2.38 mmol) were added successively at 0°C. The resulting mixture was stirred for 1 h at room temperature. Thereafter, the mixture was evaporated under reduced pressure to give light colored oil. The resulting oil was purified by silica to give pure trichloroacetamidate **1e $\alpha\beta$**  (488 mg, 84 %,  $\alpha$ :  $\beta$  = 3.3:1) as a white solid. <sup>1</sup>H NMR (400 MHz, CDCl<sub>3</sub>):  $\delta$  8.64 (s, 1 H, NH), 8.52 (s, 0.3 H), 7.39-7.27 (m, 19 H), 6.32 (s, 1 H, H-1 $\beta$ ), 6.20 (d,  $J$  = 6.8 Hz, 1 H, H-1 $\alpha$ ), 4.82-4.75 (m, 3.3 H), 4.71-4.64 (m, 1.4 H), 4.62-4.53 (m, 3 H), 4.49-4.43 (m, 0.6 H), 4.14-4.11 (m, 0.3 H), 4.07-3.99 (m, 2.3 H), 3.88 (dd,  $J$  = 4.1, 11.3 Hz, 1 H), 3.70 (dd,  $J$  = 4.1, 11.3 Hz, 0.3 H), 3.65-3.61 (m, 1 H), 3.58 (dd,  $J$  = 2.9, 6.7 Hz, 1.2 H), 3.54-3.52 (m, 0.2 H); <sup>13</sup>C NMR (100 MHz, CDCl<sub>3</sub>):  $\delta$  161.1, 160.8 (Cq, C=NH), 138.5, 138.2, 138.0, 137.8, 137.5, 128.5, 128.4, 128.3, 128.2, 127.9, 127.8, 127.7, 127.6, 127.5, 103.4 (C-1 $\beta$ ), 97.0 (C-1 $\alpha$ ), 91.9, 91.1 (Cq<sup>CCl<sub>3</sub></sup>), 82.1, 78.5, 77.3, 76.4, 74.6, 74.2, 73.4, 73.3, 72.9, 72.6, 72.2, 71.6, 70.3, 63.4 (C-5).

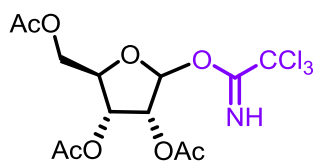

**2,3,5-Tri-*O*-acetyl- $\alpha/\beta$ -D-ribofuranosyl trichloroacetimidate (1f).**<sup>8</sup> To a stirred solution of compound 2,3,5-tri-*O*-acetyl-D-ribofuranose (500 mg, 1.92 mmol) in CH<sub>2</sub>Cl<sub>2</sub> (15 mL), trichloroacetonitrile (1.96 mL, 19.2 mmol) followed by 1,8-diaz abicyclo-[5.4.0]undec-7-ene (DBU; 80  $\mu$ L, 0.53 mmol) were added successively at 0°C. The resulting mixture was stirred for 1 h at room temperature. Thereafter, the mixture was evaporated under reduced pressure to give light colored oil. The resulting oil was purified by silica to give pure trichloroacetimidate **2f** (560 mg, 73 %) as a white solid.

### 3. Carbamate derivatives: Characterization data of Carbamates derivatives (2a-2j)

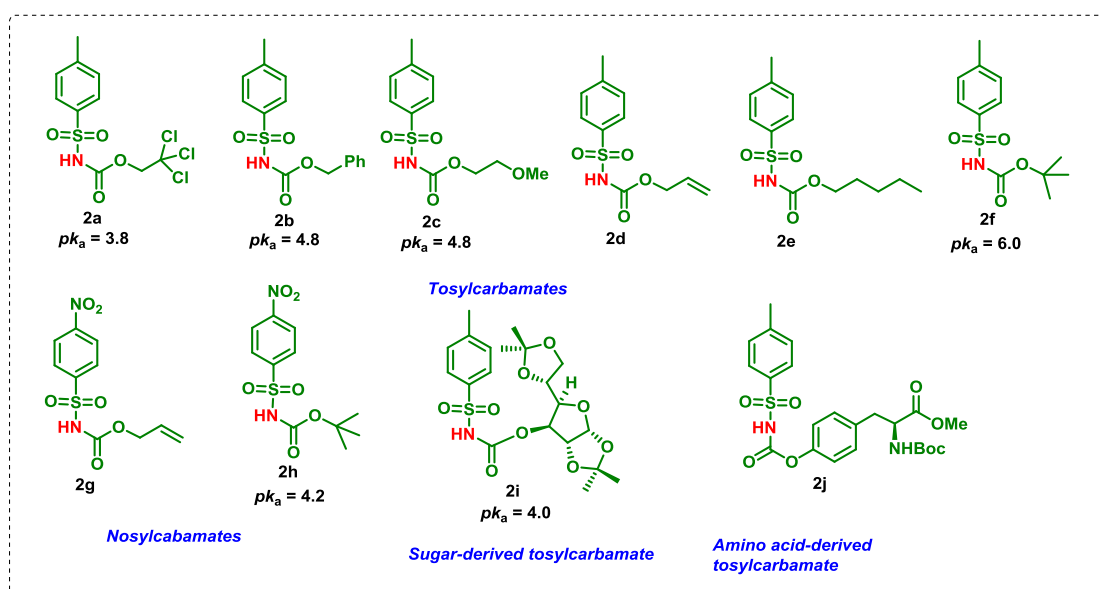

Ref.

- Li, Y. G.; Li, L.; Yang, M. Y.; He, G.; Kantchev, E. A. B. A Bulky Disulfoxide Ligand for Pd-Catalyzed Oxidative Allylic C-H Amination with 2,2,2-Trichloroethyl Tosyl Carbamate. *J. Org. Chem.* **2017**, *82*, 4907–4917.
- Reed, S. A.; White, M. C. Catalytic Intermolecular Linear Allylic C–H Amination via Heterobimetallic Catalysis. *J. Am. Chem. Soc.* **2008**, *130*, 3316–3318.
- Cheng, Y. A.; Yu, W. Z.; Yeung, Y. Y. An Unexpected Bromolactamization of Olefinic Amides Using a Three-Component Co-Catalyst System. *J. Org. Chem.* **2016**, *81*, 545–552.
- Henry, J. R.; Marcin, L. R.; McIntosh, M. C.; Scola, P. M.; Davis Harris, G.; Weinreb, S. M. Mitsunobu Reactions of N-Alkyl and n-Acyl Sulfonamides—an Efficient Route to Protected Amines. *Tetrahedron Lett.* **1989**, *30*, 5709–5712.

13. Mainolfi, N.; Moyer, M. P.; Saiah, E. 3-Phosphoglycerate Dehydrogenase Inhibitors And Uses Thereof. WO2017/156181, **2017**.
14. Y. G. Li, L. Li, M. Y. Yang, G. He, E. A. B. Kantchev, *J. Org. Chem.* **2017**, *82*, 4907–4917.
15. S. A. Reed, M. C. White, *J. Am. Chem. Soc.* **2008**, *130*, 3316–3318.
16. Y. A. Cheng, W. Z. Yu, Y. Y. Yeung, *J. Org. Chem.* **2016**, *81*, 545–552.
17. J. R. Henry, L. R. Marcin, M. C. McIntosh, P. M. Scola, G. Davis Harris, S. M. Weinreb, *Tetrahedron Lett.* **1989**, *30*, 5709–5712.
18. N. Mainolfi, , M. P. Moyer, E. Saiah, 3-Phosphoglycerate Dehydrogenase Inhibitors And Uses Thereof. WO2017/156181, **2017**.

**General Procedure: Synthesis of Tosyl carbamates.** An alcohol derivative (5.0 mmol), dissolved in a minimum quantity of dry DCM was taken in a round bottom flask and stirred at 0°C. Tosyl isocyanate (1.0 mmol) was added slowly to a reaction mixture and stirred for 5–6 h at rt. After completion, an excess of alcohol was removed *in vacuo*. The crude product was purified by flash column chromatography with the eluent Petroleum ether/ EtOAc (3:2) to afford the desired carbamate derivatives as a white solid.

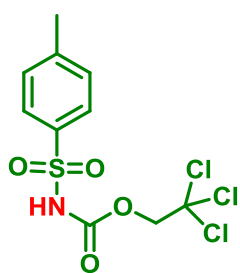

**2,2,2-Trichloroethyl N-(4-methylbenzenesulfonyl)carbamate (2a).**<sup>14</sup>

Trichloroethyl alcohol (4.9 ml, 50.71 mmol) was cooled down in an ice bath. Then *p*-toluenesulfonyl isocyanate (1.5 ml, 10.14 mmol) was added. Afforded the desired product **2a** (3.00 g, 86 %) as a white crystalline solid. (3.00 g, 8.80 mmol, 86 %). <sup>1</sup>H NMR (400 MHz, CDCl<sub>3</sub>): δ 8.00 (s, *NH*, 1H), 7.95 (d, *J* = 8.4 Hz, 2 H, Ar), 7.35 (d, *J* = 8.1 Hz, 2 H, Ar), 4.69

(s, 2 H), 2.45 (s, 3 H, CH<sub>3</sub> Ts); <sup>13</sup>C NMR (100 MHz, CDCl<sub>3</sub>): δ 149.1 (C=O), 145.5, 134.9, 129.7, 128.5, 93.9 (CCl<sub>3</sub>), 75.2 (CH<sub>2</sub>), 21.7 (CH<sub>3</sub>).

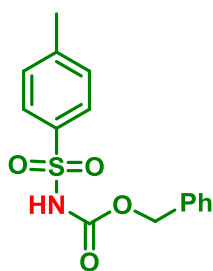

### Benzyl *N*-(4-methylbenzenesulfonyl)carbamate (**2b**).<sup>15</sup>

Benzyl alcohol (1.1 ml, 10.7 mmol) was cooled down in an ice bath. Then *p*-toluenesulfonyl isocyanate (1.5 ml, 10.14 mmol) was added. afford the desired product **2b** (2.9 g, 94 %) as a white crystalline solid. <sup>1</sup>H NMR (400 MHz, CDCl<sub>3</sub>): δ 7.88 (d, *J* = 8.4 Hz, 2 H, Ar<sub>Ts</sub>), 7.57(s, 1 H, NH), 7.34-7.23 (m, 7 H), 5.09 (s, 2 H), 2.44 (s, 3 H, CH<sub>3</sub>); <sup>13</sup>C NMR (100 MHz, CDCl<sub>3</sub>): δ 150.2 (C=O), 145.1, 135.5, 134.4, 129.6, 128.7, 128.6, 128.5, 128.4, 68.6, 21.7 (CH<sub>3</sub>Ts).

### 2-methoxyethyl *N*-(4-methylbenzenesulfonyl)carbamate (**2c**)<sup>16</sup>

The compound **2c**, **2d** was prepared using the general procedure.

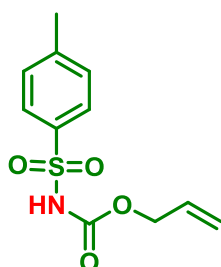

### Allyl *N*-(4-methylbenzenesulfonyl)carbamate (**2d**).<sup>16</sup>

Allyl alcohol (3.4 ml, 50.71 mmol) was cooled down in an ice bath. Then *p*-toluenesulfonyl isocyanate (1.5 ml, 10.14 mmol) was added. Afforded the desired product **2d** (2.1 g, 90 %) as a white crystalline solid. <sup>1</sup>H NMR (400 MHz, CDCl<sub>3</sub>): δ 7.92 (d, *J* = 8.5 Hz, 2 H, Ar), 7.62 (s, NH, 1H), 7.34 (d, *J* = 8.3 Hz, 2 H, Ar), 5.87-5.77 (m, 1 H), 5.30-5.22 (m, 2 H), 4.57-4.55 (m, 2 H), 2.45 (s, 3 H, CH<sub>3</sub>, Ts); <sup>13</sup>C NMR (100 MHz, CDCl<sub>3</sub>): δ 150.2 (C=O), 145.1, 135.5, 130.9, 129.6, 128.4, 119.4, 67.4 (CH<sub>2</sub> Alloc), 21.7 (CH<sub>3</sub>).

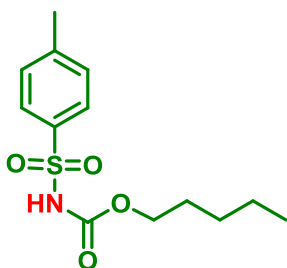

#### Pentyl *N*-(4-methylbenzenesulfonyl)carbamate (**2e**).

Pentyl alcohol (3.0 ml, 27.2 mmol) was cooled down in an ice bath. Then *p*-toluenesulfonyl isocyanate (1.5 ml, 10.14 mmol) was added. Afforded the desired product **2e** (2.1 g, 90 %) as an oil. <sup>1</sup>H NMR (400 MHz, CDCl<sub>3</sub>): δ 7.92 (d, *J* = 8.4 Hz, 2 H, Ar), 7.66 (s, 1 H, NH), 7.34 (d, *J* = 8.4 Hz, 2 H, Ar), 4.07 (t, *J* = 6.7 Hz, 2 H, OCH<sub>2</sub>), 2.45 (s, 3 H, CH<sub>3</sub>Ts), 1.59-1.55 (m, 2 H), 1.33-1.17 (m, 4 H), 0.86 (t, *J* = 7.2 Hz, 3 H, CH<sub>3</sub>); <sup>13</sup>C NMR (100 MHz, CDCl<sub>3</sub>): δ 151.0 (C=O), 145.0, 135.6, 129.6, 128.4, 67.2 (OCH<sub>2</sub>), 28.1, 27.7, 22.2, 21.7 (CH<sub>3</sub>Ts), 13.9 (CH<sub>3</sub>).

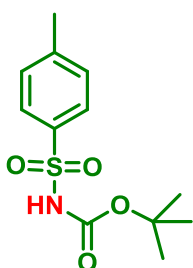

#### *Tert*-butyl *N*-(4-methylbenzenesulfonyl)carbamate (**2f**)<sup>17</sup>

*t*-BuOH (9.6 ml, 101.42 mmol) was stirred at rt. Then *p*-toluenesulfonyl isocyanate (1.5 ml, 10.14 mmol) was added. Afforded the desired product **2f** (2.1 g, 86%) as a white crystalline solid. <sup>1</sup>H NMR (400 MHz, CDCl<sub>3</sub>): δ 7.89 (d, *J* = 8.4 Hz, 2 H, Ar), 7.33(d, *J* = 8.1 Hz, 2 H, Ar), 7.30 (s, *NH*, 1H), 2.45 (s, 3 H, CH<sub>3</sub>, Ts), 1.38 (s, 9 H, CH<sub>3</sub> Boc); <sup>13</sup>C NMR (100 MHz, CDCl<sub>3</sub>): δ 149.1 (C=O), 144.7, 135.9, 129.5, 128.2, 84.1 (CH<sub>Boc</sub>), 27.9 (CH<sub>3</sub> Boc), 21.7 (CH<sub>3</sub> Ts).

**General Procedure: Synthesis of Nosyl carbamates.** 4-nitrophenylsulfonamide (4.9 mmol), Boc anhydride/allyl chloroformate (7.5 mmol) in dry DCM was stirred for five min. and then added DMAP (0.4 mmol) at rt. After 20 min, triethylamine (7.5 mmol) was added dropwise to a stirring solution at 0°C and allowed to stir overnight and extracted with 1M aq. HCl (2 x 25 mL) and dried over Na<sub>2</sub>SO<sub>4</sub>. The organic phase was evaporated *in a vacuum* and purified by flash column chromatography, furnishing the desired carbamate derivatives as a white solid.

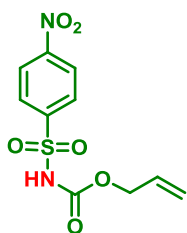

**Allyl *N*-(4-nitrophenyl)sulfonylcarbamate (**2g**).**<sup>18</sup>

Triethylamine (1.05 mL, 7.5 mmol) was added dropwise over 15 minutes to a stirring solution of allyl chloroformate (0.8 mL, 7.5 mmol), DMAP (54 mg, 0.44 mmol) and 4-nitrophenylsulfonamide (996 mg, 4.93 mmol) in DCM (10 mL). Yielding the desired product **2g** as a white solid (900 mg, 66 %). <sup>1</sup>H NMR (400 MHz, CDCl<sub>3</sub>): δ 8.45 (d, *J* = 8.9 Hz, 2H,

Ar), 8.16 (d,  $J = 8.9$  Hz, 2H, Ar), 5.88-5.79 (m, 1H, CH<sub>Allyl</sub>), 5.25 (dq,  $J = 17.2, 1.6$  Hz, 1H, CH<sub>2</sub><sub>Allyl</sub><sup>b</sup>), 5.19 (dq,  $J = 10.4, 1.4$  Hz, 1H, CH<sub>2</sub><sub>Allyl</sub><sup>b</sup>), 4.51 (dt,  $J = 5.5, 1.5$  Hz, 2H, OCH<sub>2</sub>).

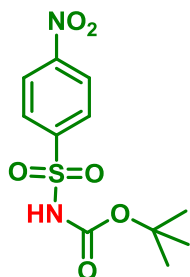

***Tert*-butyl *N*-(4-nitrophenyl)sulfonylcarbamate (**2h**).**<sup>18</sup>

Triethylamine (0.5 mL, 3.6 mmol) was added dropwise over 15 minutes to a stirring solution of 4-nitrophenylsulfonamide (481 mg, 2.38 mmol), Boc anhydride (930 mg, 4.26 mmol) and DMAP (36 mg, 0.29 mmol) at rt. Yielding the desired product **2h**, as a white solid (600 mg, 80 %). <sup>1</sup>H NMR (400 MHz, DMSO-*d*<sub>6</sub>):  $\delta$  8.46 (d,  $J = 8.8$  Hz, 2H, Ar), 8.24 (d,  $J = 8.8$  Hz, 2H, Ar), 1.41 (s, 9 H, CH<sub>3</sub>).

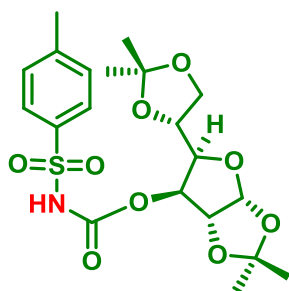

**1,2:5,6-di-O-isopropylidene- $\alpha$ -D-glucofuranosyl tosylcarbamate (**2i**).**

To a solution of the 2,3:5,6-di-*O*-isopropylidene- $\alpha$ -D-glucofuranose (1.00 g, 3.8 mmol) in CH<sub>2</sub>Cl<sub>2</sub> (2.5 mL) cooled at 0 °C was added *p*-toluenesulfonyl isocyanate (0.59 mL, 3.8 mmol) dropwise under nitrogen. The resulting reaction mixture was stirred for long time and concentrated under vacuum. The residue was purified by flash column chromatography (1:1 EtOAc/Hexane) to the desired product, **17**, (1.4 g, 81 %) as a colourless oil. <sup>1</sup>H NMR (400



MHz, CDCl<sub>3</sub>):  $\delta$  7.91 (d,  $J$  = 8.2 Hz, 2H, Ar), 7.77 (brs, 1H, NH), 7.38 (d,  $J$  = 8.2 Hz, 2H, Ar), 5.76 (d,  $J$  = 3.7 Hz, 1 H, H-1), 5.17 (d,  $J$  = 2.9 Hz, 1H, H-3), 4.42 (d,  $J$  = 3.7 Hz, 1H, H-2), 4.11–4.08 (m, 1H, H-4), 4.02 – 3.91 (m, 3H, H-5, H-6<sub>a</sub>, H-6<sub>b</sub>), 2.46 (s, 3H, Tosyl-CH<sub>3</sub>), 1.48 (s, 3H, CH<sub>3</sub>), 1.36 (s, 3H, CH<sub>3</sub>), 1.27 (s, 3H, CH<sub>3</sub>), 1.24 (s, 3H, CH<sub>3</sub>); <sup>13</sup>C NMR (100 MHz, CDCl<sub>3</sub>):  $\delta$  149.1 (C-N-O), 145.3, 135.4, 129.7, 128.4, 112.5, 109.6, 104.9 (C-1), 82.9 (C-2), 79.7 (C-4), 78.5 (C-3), 71.9 (C-5), 67.3 (C-6), 26.8 (CH<sub>3</sub>), 26.6 (CH<sub>3</sub>), 26.2 (CH<sub>3</sub>), 25.1 (CH<sub>3</sub>), 21.7 (Tosyl-CH<sub>3</sub>).

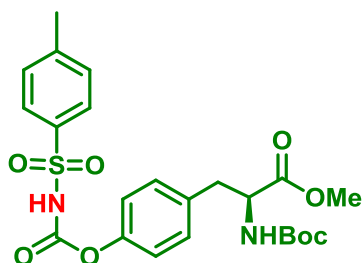

#### **N'-Tosyl O-(N-Boc-tyrosine methyl ester) carbamate (2j).**

To a solution of Boc-L-tyrosine methyl ester 12 (500 mg, 1.7 mmol) in dry CH<sub>2</sub>Cl<sub>2</sub> (9 mL) at rt under nitrogen was added *p*-toluenesulfonyl isocyanate (0.23 mL, 1.53 mmol). The resulting mixture was stirred at rt for 6 hr and concentrated under vacuum. The crude residue was purified by flash column chromatography (hexanes/ EtOAc = 1/1) to furnish the desired product 19 (1.001 g, 2.07 mmol, 80 %) as a white solid. <sup>1</sup>H NMR (400 MHz, CDCl<sub>3</sub>):  $\delta$  7.81 (d,  $J$  = 8.4 Hz, 2H, Ar<sup>Ts</sup>), 7.30 (d,  $J$  = 8.3 Hz, 2H, Ar<sup>Ts</sup>), 6.97 (d,  $J$  = 8.1 Hz, 2H, Ar<sup>Tyr</sup>), 6.73 (d,  $J$  = 8.2 Hz, 1H, Ar<sup>Tyr</sup>), 5.01 (brs, 1H), 4.54 (q,  $J$  = 6.6 Hz, 1H, CH-NH), 3.71 (s, 3H, OCH<sub>3</sub>), 3.05 – 2.95 (m, 2H), 2.43 (s, 3H), 1.41 (s, 9H, CH<sub>3</sub><sup>Boc</sup>); <sup>13</sup>C NMR (100 MHz, CDCl<sub>3</sub>):  $\delta$  172.7 (C=O<sup>Boc</sup>), 155.3 (C=O<sup>carbamate</sup>), 143.6, 139.2, 130.4, 129.7, 126.4, 115.5, 80.2 (tert-C<sup>Boc</sup>), 54.7 (CH-NH), 52.3 (OCH<sub>3</sub>), 37.6 (CH<sub>2</sub>), 28.3 (CH<sub>3</sub><sup>Boc</sup>), 21.5 (CH<sub>3</sub><sup>Ts</sup>).

#### 4. Characterization data of synthesized N-glycofuranosides (3a-3z, 3v', 3aa, 4, 5, 6)

##### General procedure for N-glycosylations.

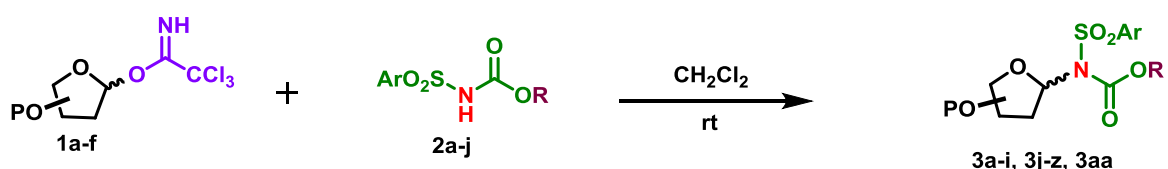

To a stirred solution of trichloroacetimidate glycosyl donor **1a-e** (1.0 mmol) in dry DCM (2 mL) under a nitrogen atmosphere, 1.2 equivalents of carbamate acceptor (**2a-g**) were added to a stirred solution. The reaction was stirred at room temperature for 24 h. After completion, the reaction mixture was diluted with  $\text{CH}_2\text{Cl}_2$  and washed with 0.1M aq. NaOH to remove trichloroacetamide. The aqueous layer was then extracted with DCM (3 x 20 ml). The combined organic fractions were dried over  $\text{Na}_2\text{SO}_4$  and concentrated under reduced pressure. Purification of the crude product over  $\text{SiO}_2$  using hexane-EtOAc (6:1) as the eluant furnished pure N-glycoside products (**5a-r**).

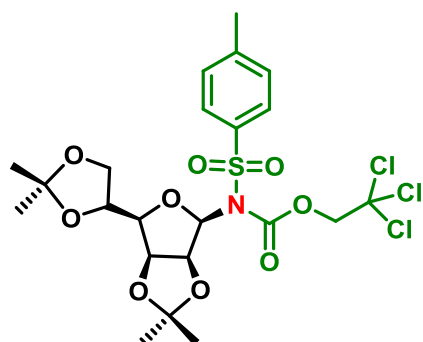

**2,3;5,6-Di-O-isopropylidene- $\beta$ -D-mannofuranosyl 2,2,2-trichloroethyl tosylcarbamate (3a)**. Synthesized according to general procedure in 1 mmol scale, afforded **3a** (499 mg, yield 85%,  $\beta$  only); eluant, hexane-EtOAc (4:1); as a colorless

syrup.  $^1\text{H}$  NMR (400 MHz,  $\text{CDCl}_3$ ):  $\delta$  7.89 (d,  $J = 8.3$  Hz, 2 H,  $\text{Ar}^{\text{Ts}}$ ), 7.30 (d,  $J = 8.3$  Hz, 2 H,  $\text{Ar}^{\text{Ts}}$ ), 6.29 (brs, 1 H, H-1), 5.28 (d,  $J = 6.0$  Hz, 1 H, H-2), 5.02 (dd,  $J = 3.5, 6.0$  Hz, 1 H, H-3), 4.74 (d,  $J = 12.2$  Hz, 1 H,  $\text{CH}_2^{\text{Troc}}$ ), 4.64 (d,  $J = 11.9$  Hz, 1 H, ( $\text{CH}_2^{\text{Troc}}$ ), 4.49 (dd,  $J = 4.1, 6.9$  Hz, 1 H, H-4), 4.39-4.35 (m, 1 H, H-5), 4.11 (dd,  $J = 6.5, 8.7$  Hz, 1 H, H-6<sub>a</sub>), 4.02 (dd,  $J = 5.1, 8.7$  Hz, 1 H, H-6<sub>b</sub>), 2.43 (s, 3 H,  $\text{CH}_3^{\text{Ts}}$ ), 1.55 (s, 3 H,  $\text{CH}_3$ ), 1.45 (s, 3 H,  $\text{CH}_3$ ), 1.38 (s, 3 H,  $\text{CH}_3$ ), 1.37 (s, 3 H,  $\text{CH}_3$ );  $^{13}\text{C}$  NMR (100 MHz,  $\text{CDCl}_3$ ):  $\delta$  151.5 (C=O), 145.1, 136.2, 129.6, 128.2, 113.2 (Cq,  $\text{C}(\text{Me})_2$ ), 109.1 (Cq,  $\text{C}(\text{CH}_3)_2$ ), 94.4 (C-1), 93.6 ( $\text{CCl}_3$ ), 86.3 (C-2), 85.7 (C-4), 81.4 (C-3), 76.1 ( $\text{CH}_2^{\text{Troc}}$ ), 73.9 (C-5), 66.5 (C-6), 26.8( $\text{CH}_3$ ), 26.3( $\text{CH}_3$ ), 25.3( $\text{CH}_3$ ), 24.4 ( $\text{CH}_3$ ), 21.6 ( $\text{CH}_3^{\text{Ts}}$ ); HRMS (ESI-TOF)  $m/z$  Calcd for  $\text{C}_{22}\text{H}_{33}\text{Cl}_3\text{N}_2\text{O}_9\text{S}^+$  [ $\text{M} + \text{NH}_4$ ] $^+$ : 605.0889, found: 605.0886.

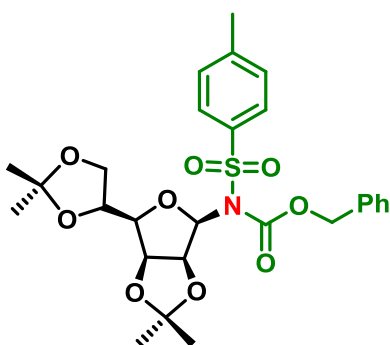

**2,3;5,6-Di-O-isopropylidene- $\beta$ -D-mannofuranosyl benzyl**

**tosylcarbamate (3b)**. Synthesized according to general procedure in 1 mmol scale, afforded **3b** (465 mg, yield 85%,  $\beta$  only); eluant, hexane-EtOAc (4:1); as a colorless syrup.  $^1\text{H}$  NMR (400 MHz,  $\text{CDCl}_3$ ):  $\delta$  7.66 (d,  $J = 8.5$  Hz, 2 H,  $\text{Ar}^{\text{Ts}}$ ), 7.38-7.31 (m, 3 H, Ar), 7.17-7.15 (m, 2 H, Ar), 7.11 (d,  $J = 8.3$  Hz, 2 H,  $\text{Ar}^{\text{Ts}}$ ), 6.25 (brs, 1 H, H-1), 5.23 (dd,  $J = 1.0, 6.1$  Hz, 1 H, H-2), 5.04 (brs, 2 H, ( $\text{OCH}_2\text{Ph}$ ), 4.89 (dd,  $J = 4.0, 5.9$  Hz, 1 H, H-3), 4.42 (dd,  $J = 4.2, 7.1$  Hz, 1 H, H-4), 4.36-4.31 (m, 1 H, H-5), 4.10 (dd,  $J = 6.4, 8.7$  Hz, 1 H, H-6<sub>a</sub>), 4.01 (dd,  $J = 4.7, 8.9$  Hz, 1 H, H-6<sub>b</sub>), 2.38 (s, 3 H,  $\text{CH}_3^{\text{Ts}}$ ), 1.53 (s, 3 H,  $\text{CH}_3$ ), 1.44 (s, 3 H,  $\text{CH}_3$ ), 1.38 (s, 3 H,  $\text{CH}_3$ ), 1.33 (s, 3 H,  $\text{CH}_3$ );  $^{13}\text{C}$  NMR (100 MHz,  $\text{CDCl}_3$ ):  $\delta$  152.3 (C=O), 144.5, 136.3, 133.8, 129.3, 128.8, 128.6, 128.5, 128.2, 126.9, 112.9 (Cq,  $\text{C}(\text{Me})_2$ ), 109.1 (Cq,  $\text{C}(\text{Me})_2$ ), 93.6 (C-1),

86.4 (C-2), 85.5 (C-4), 81.5 (C-3), 73.9 (C-5), 69.5 (OCH<sub>2</sub>Ph), 66.5 (C-6), 26.9 (CH<sub>3</sub>), 26.2 (CH<sub>3</sub>), 25.3 (CH<sub>3</sub>), 24.3 (CH<sub>3</sub>), 21.6 (CH<sub>3</sub><sup>Ts</sup>); HRMS (ESI-TOF) *m/z* Calcd for C<sub>27</sub>H<sub>37</sub>N<sub>2</sub>O<sub>9</sub>S<sup>+</sup> [M+ NH<sub>4</sub>]<sup>+</sup>: 565.2214, found: 565.2209.

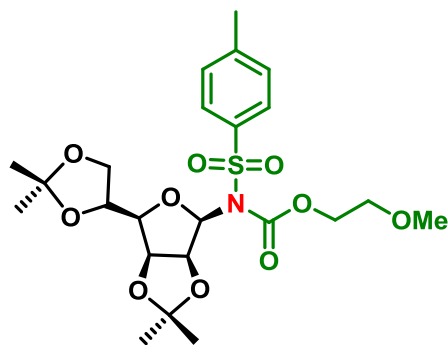

**2,3;5,6-Di-O-isopropylidene- $\beta$ -D-mannofuranosyl 2-methoxyethyl tosylcarbamate (3c).** Synthesized according to general procedure in 1 mmol scale, afforded **3c** (413 mg, yield 83%,  $\beta$  only); eluant, hexane-EtOAc (4:1); as a colorless syrup. <sup>1</sup>H NMR (400 MHz, CDCl<sub>3</sub>):  $\delta$  7.87 (d, *J* = 8.3 Hz, 2 H, Ar<sup>Ts</sup>), 7.30 (d, *J* = 8.3 Hz, 2 H, Ar<sup>Ts</sup>), 6.25 (brs, 1 H, H-1), 5.22 (dd, *J* = 1.0, 6.0 Hz, 1 H, H-2), 4.99 (dd, *J* = 4.1, 5.9 Hz, 1 H, H-3), 4.43 (dd, *J* = 3.9, 6.8 Hz, 1 H, H-4), 4.37-4.33 (m, 1 H, H-5), 4.19-4.17 (m, 2 H, OCH<sub>2</sub>), 4.10 (dd, *J* = 6.4, 8.9 Hz, 1 H, H-6<sub>b</sub>), 4.01 (dd, *J* = 5.1, 8.7 Hz, 1 H, H-6<sub>a</sub>), 3.46-3.44 (m, 2 H, CH<sub>2</sub>OMe), 3.30 (s, 3 H, OCH<sub>3</sub>), 2.44 (s, 3 H, CH<sub>3</sub><sup>Ts</sup>), 1.54 (s, 3 H, CH<sub>3</sub>), 1.45 (s, 3 H, CH<sub>3</sub>), 1.38 (s, 3 H, CH<sub>3</sub>), 1.35 (s, 3 H, CH<sub>3</sub>); <sup>13</sup>C NMR (100 MHz, CDCl<sub>3</sub>):  $\delta$  152.3 (C=O), 144.7, 136.5, 129.3, 128.4, 112.9 (C<sub>q</sub>, C(Me)<sub>2</sub>), 109.0 (C<sub>q</sub>, C(Me)<sub>2</sub>), 93.6 (C-1), 86.4 (C-2), 85.4 (C-4), 81.5 (C-3), 73.9 (C-5), 69.7 (CH<sub>2</sub>OMe), 66.5 (OCH<sub>2</sub>), 66.4 (C-6), 58.8 (OCH<sub>3</sub>), 26.8 (CH<sub>3</sub>), 26.2 (CH<sub>3</sub>), 25.3 (CH<sub>3</sub>), 24.3 (CH<sub>3</sub>), 21.6 (CH<sub>3</sub><sup>Ts</sup>); HRMS (ESI-TOF) *m/z* Calcd for C<sub>23</sub>H<sub>34</sub>NO<sub>10</sub>S<sup>+</sup> [M+ H]<sup>+</sup>: 516.1898, found: 516.1895.

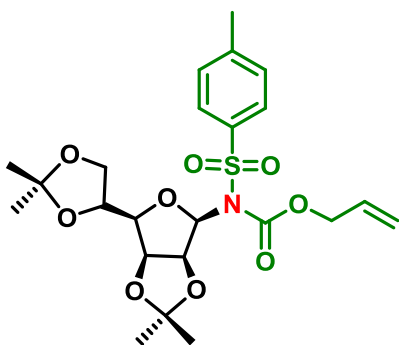

**2,3;5,6-Di-O-isopropylidene- $\beta$ -D-mannofuranosyl allyl**

**tosylcarbamate (3d).** Synthesized according to general procedure in 1 mmol scale, afforded **3d** (422 mg, yield 85%,  $\beta$  only); eluant, hexane-EtOAc (4:1); as a colorless syrup.  $^1\text{H}$  NMR (400 MHz,  $\text{CDCl}_3$ ):  $\delta$  7.83 (d,  $J = 8.4$  Hz, 2 H,  $\text{Ar}^{\text{Ts}}$ ), 7.29 (d,  $J = 8.3$  Hz, 2 H,  $\text{Ar}^{\text{Ts}}$ ), 6.24 (brs, 1 H, H-1), 5.77-5.67 (m, 1 H, =CH), 5.26-5.21 (m, 3 H, H-2, =CH<sub>2</sub>), 4.98 (dd,  $J = 4.1, 6.1$  Hz, 1 H, H-3), 4.58-4.47 (m, 2 H,  $\text{CH}_{2\text{Allyl}}$ ), 4.40 (dd,  $J = 3.9, 6.8$  Hz, 1 H, H-4), 4.38-4.33 (m, 1 H, H-5), 4.10 (dd,  $J = 6.4, 8.9$  Hz, 1 H, H-6<sub>a</sub>), 4.02 (dd,  $J = 5.1, 8.7$  Hz, 1 H, H-6<sub>b</sub>), 2.43 (s, 3 H,  $\text{CH}_3^{\text{Ts}}$ ), 1.54 (s, 3 H,  $\text{CH}_3$ ), 1.45 (s, 3 H,  $\text{CH}_3$ ), 1.38 (s, 3 H,  $\text{CH}_3$ ), 1.35 (s, 3 H,  $\text{CH}_3$ );  $^{13}\text{C}$  NMR (100 MHz,  $\text{CDCl}_3$ ):  $\delta$  152.1 (C=O), 144.7, 136.5, 130.4 (=CH), 129.4, 128.4, 119.8 (=CH<sub>2</sub>), 113.0 (C<sub>q</sub>, C(Me)<sub>2</sub>), 109.0 (C<sub>q</sub>, C(Me)<sub>2</sub>), 93.7 (C-1), 86.4 (C-2), 85.5 (C-4), 81.5 (C-3), 73.9 (C-5), 68.2 ( $\text{CH}_{2\text{Allyl}}$ ), 66.5 (C-6), 26.8 ( $\text{CH}_3$ ), 26.2 ( $\text{CH}_3$ ), 25.3 ( $\text{CH}_3$ ), 24.4 ( $\text{CH}_3$ ), 21.6 ( $\text{CH}_3^{\text{Ts}}$ ); HRMS (ESI-TOF)  $m/z$  Calcd for  $\text{C}_{23}\text{H}_{35}\text{N}_2\text{O}_9\text{S}^+$  [ $\text{M} + \text{NH}_4$ ]<sup>+</sup>: 515.2058, found: 515.2043.

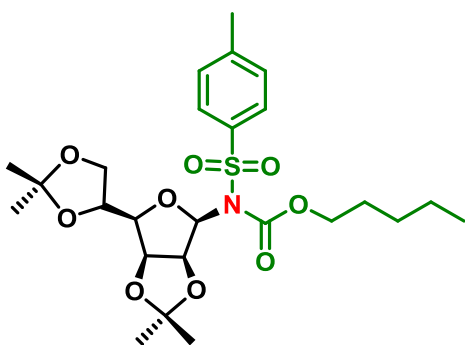

**2,3;5,6-Di-O-isopropylidene- $\beta$ -D-mannofuranosyl *n*-**

**pentyl tosylcarbamate (3e).** Synthesized according to general procedure in 1 mmol scale,

afforded **3e** (416 mg, yield 79%,  $\beta$  only); eluant, hexane-EtOAc (4:1); as a colorless syrup.  $^1\text{H}$  NMR (400 MHz,  $\text{CDCl}_3$ ):  $\delta$  7.83 (d,  $J = 8.3$  Hz, 2 H,  $\text{Ar}^{\text{Ts}}$ ), 7.29 (d,  $J = 8.3$  Hz, 2 H,  $\text{Ar}^{\text{Ts}}$ ), 6.25 (brs, 1 H, H-1), 5.25 (dd,  $J = 0.8, 6.1$  Hz, 1 H, H-2), 4.99 (dd,  $J = 4.1, 5.9$  Hz, 1 H, H-3), 4.46 (dd,  $J = 4.1, 6.9$  Hz, 1 H, H-4), 4.38-4.34 (m, 1 H, H-5), 4.11 (dd,  $J = 6.4, 8.7$  Hz, 1 H, H-6<sub>a</sub>), 4.05-4.01 (m, 3 H, H-6<sub>b</sub>,  $\text{OCH}_2$ ), 2.44 (s, 3 H,  $\text{CH}_3^{\text{Ts}}$ ), 1.54 (s, 3 H,  $\text{CH}_3$ ), 1.50-1.43 (m, 2 H,  $\text{CH}_2$ ), 1.45 (s, 3 H,  $\text{CH}_3$ ), 1.38 (s, 3 H,  $\text{CH}_3$ ), 1.36 (s, 3 H,  $\text{CH}_3$ ), 128-1.21 (m, 2 H,  $\text{CH}_2$ ), 1.17-1.10 (m, 2 H,  $\text{CH}_2$ ), 0.86 (t,  $J = 7.1$  Hz, 3 H,  $\text{CH}_3$ );  $^{13}\text{C}$  NMR (100 MHz,  $\text{CDCl}_3$ ):  $\delta$  152.5 (C=O), 144.6, 136.9, 129.4, 128.1, 112.9 (Cq,  $\text{C}(\text{Me})_2$ ), 109.0 (Cq,  $\text{C}(\text{Me})_2$ ), 93.6 (C-1), 86.4 (C-2), 85.6 (C-4), 81.6 (C-3), 73.9 (C-5), 68.1 ( $\text{OCH}_2$ ), 66.5 (C-6), 27.9 ( $\text{CH}_2$ ), 27.6 ( $\text{CH}_2$ ), 26.8 ( $\text{CH}_3$ ), 26.2 ( $\text{CH}_3$ ), 25.3 ( $\text{CH}_3$ ), 24.4 ( $\text{CH}_3$ ), 22.2 ( $\text{CH}_2$ ), 21.6 ( $\text{CH}_3^{\text{Ts}}$ ), 13.8 ( $\text{CH}_3$ ); HRMS (ESI-TOF)  $m/z$  Calcd for  $\text{C}_{25}\text{H}_{41}\text{N}_2\text{O}_9\text{S}^+$  [ $\text{M} + \text{NH}_4$ ] $^+$ : 545.2527, found: 545.2514.

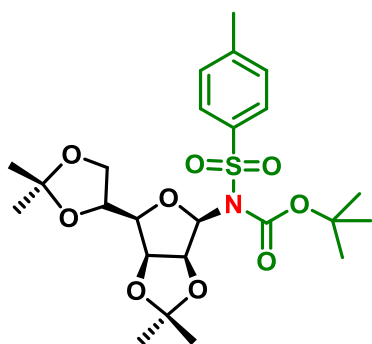

**2,3;5,6-Di-O-isopropylidene- $\beta$ -D-mannofuranosyl *tert*-butyl**

**tosylcarbamate (3f)**. Synthesized according to general procedure in 1 mmol scale, afforded **5a** (343 mg, yield 67%,  $\beta$  only); eluant, hexane-EtOAc (4:1); as a colorless syrup.  $^1\text{H}$  NMR (400 MHz,  $\text{CDCl}_3$ ):  $\delta$  7.84 (d,  $J = 8.3$  Hz, 2 H,  $\text{Ar}^{\text{Ts}}$ ), 7.29 (d,  $J = 8.0$  Hz, 2 H,  $\text{Ar}^{\text{T}}$ ), 6.21 (brs, 1 H, H-1), 5.25 (dd,  $J = 1.1, 6.1$  Hz, 1 H, H-2), 5.00 (dd,  $J = 4.1, 6.0$  Hz, 1 H, H-3), 4.51 (dd,  $J = 4.1, 6.9$  Hz, 1 H, H-4), 4.39-4.35 (m, 1 H, H-5), 4.12 (dd,  $J = 6.3, 8.7$  Hz, 1 H, H-6<sub>a</sub>), 4.06 (dd,  $J = 4.9, 8.8$  Hz, 1 H, H-6<sub>b</sub>), 2.44 (s, 3 H,  $\text{CH}_3^{\text{Ts}}$ ), 1.53 (s, 3 H,  $\text{CH}_3$ ), 1.46 (s, 3 H,  $\text{CH}_3$ ), 1.39 (s, 3 H,  $\text{CH}_3$ ), 1.36 (s, 3 H,  $\text{CH}_3$ ), 1.26 (s, 9 H,  $\text{CH}_3^{\text{Boc}}$ );  $^{13}\text{C}$  NMR (100 MHz,  $\text{CDCl}_3$ ):  $\delta$  151.0 (C=O), 144.3, 137.3, 129.3, 127.7, 112.9 (Cq,  $\text{C}(\text{Me})_2$ ), 108.9 (Cq,  $\text{C}(\text{Me})_2$ ), 93.2 (C-

1), 86.3 (C-2), 85.5 (C-4), 85.4 (Cq<sub>Boc</sub>), 81.7 (C-3), 74.0 (C-5), 66.5 (C-6), 27.7 (CH<sub>3</sub><sup>Boc</sup>), 26.8 (CH<sub>3</sub>), 26.2 (CH<sub>3</sub>), 25.3 (CH<sub>3</sub>), 24.4 (CH<sub>3</sub>), 21.6 (CH<sub>3</sub><sup>Ts</sup>); HRMS (ESI-TOF) *m/z* Calcd for C<sub>24</sub>H<sub>35</sub>NO<sub>9</sub>S<sup>+</sup> [M+ 2H]<sup>2+</sup>: 515.2031, found: 515.2037.

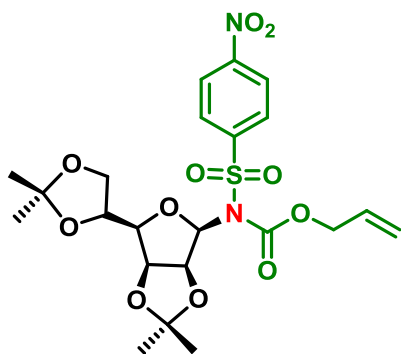

**2,3;5,6-Di-O-isopropylidene- $\beta$ -D-mannofuranosyl allyl N-**

**(4-nitrophenyl) sulfonylcarbamate (3g).** Synthesized according to general procedure in 1 mmol scale, afforded **3g** (432 mg, yield 82%,  $\beta$  only); eluant, hexane-EtOAc (4:1); as a colorless syrup. <sup>1</sup>H NMR (400 MHz, CDCl<sub>3</sub>):  $\delta$  8.34 (d, *J* = 9.0 Hz, 2 H, Ar<sup>Ns</sup>), 8.16 (d, *J* = 9.0 Hz, 2 H, Ar<sup>Ns</sup>), 6.24 (brs, 1 H, H-1), 5.79-5.69 (m, 1 H, =CH<sub>allyl</sub>), 5.31-5.29 (m, 1H, H-2), 5.27-5.25 (m, 2 H, =CH<sub>2 allyl</sub>), 4.98 (dd, *J* = 4.1, 6.1 Hz, 1 H H-3), 4.61-4.46 (m, 3 H, H-4, OCH<sub>2 allyl</sub>), 4.39-4.34 (m, 1 H, H-5), 4.11 (dd, *J* = 6.4, 8.9 Hz, 1 H, H-6<sub>a</sub>), 4.01 (dd, *J* = 5.1, 8.7 Hz, 1 H, H-6<sub>b</sub>), 1.55 (s, 3 H, CH<sub>3</sub>), 1.46 (s, 3 H, CH<sub>3</sub>), 1.38 (s, 3 H, CH<sub>3</sub>), 1.36 (s, 3 H, CH<sub>3</sub>); <sup>13</sup>C NMR (100 MHz, CDCl<sub>3</sub>):  $\delta$  151.5 (C=O), 150.6, 144.9, 129.8 (CH<sub>allyl</sub>), 129.7, 124.0, 120.8 (CH<sub>2Allyl</sub>), 113.3 (Cq, C(Me)<sub>2</sub>), 108.9 (Cq, C(Me)<sub>2</sub>), 94.1 (C-1), 86.3 (C-2), 85.7 (C-4), 81.3 (C-3), 73.9 (C-5), 68.8 (OCH<sub>2 allyl</sub>), 66.2 (C-6), 26.8 (CH<sub>3</sub>), 26.2 (CH<sub>3</sub>), 25.2 (CH<sub>3</sub>), 24.3 (CH<sub>3</sub>); HRMS (ESI-TOF) *m/z* Calcd for C<sub>22</sub>H<sub>29</sub>N<sub>2</sub>O<sub>11</sub>S<sup>+</sup> [M+ H]<sup>+</sup>: 529.1487, found: 529.1477.

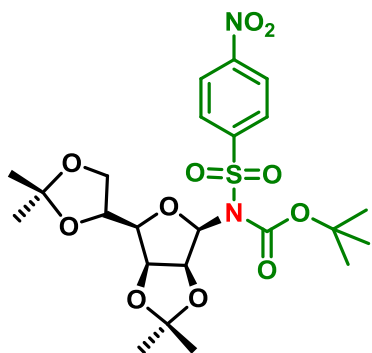

**2,3;5,6-Di-O-isopropylidene- $\beta$ -D-mannofuranosyl *tert*-butyl**

***N*-(4-nitrophenyl)sulfonylcarbamate (3h).** Synthesized according to general procedure in 1 mmol scale, afforded **3h** (359 mg, yield 66%,  $\beta$  only); eluant, hexane-EtOAc (4:1); as a colorless syrup.  $^1\text{H}$  NMR (400 MHz,  $\text{CDCl}_3$ ):  $\delta$  8.36 (d,  $J = 9.0$  Hz, 2 H,  $\text{Ar}^{\text{Ns}}$ ), 8.17 (d,  $J = 9.0$  Hz, 2 H,  $\text{Ar}^{\text{Ns}}$ ), 6.20 (brs, 1 H, H-1), 5.29 (dd,  $J = 1.0, 6.1$  Hz, 1 H, H-2), 5.02 (dd,  $J = 4.1, 6.0$  Hz, 1 H, H-3), 4.54 (dd,  $J = 4.1, 6.0$  Hz, 1 H, H-4), 4.41-4.36 (m, 1 H, H-5), 4.13 (dd,  $J = 6.5, 8.7$  Hz, 1 H, H-6<sub>a</sub>), 4.04 (dd,  $J = 5.1, 8.7$  Hz, 1 H, H-6<sub>b</sub>), 1.54 (s, 3 H,  $\text{CH}_3$ ), 1.48 (s, 3 H,  $\text{CH}_3$ ), 1.39 (s, 3 H,  $\text{CH}_3$ ), 1.37 (s, 3 H,  $\text{CH}_3$ ), 1.29 (s, 9 H,  $\text{CH}_3^{\text{Boc}}$ );  $^{13}\text{C}$  NMR (100 MHz,  $\text{CDCl}_3$ ):  $\delta$  150.4 (C=O), 150.3, 145.8, 128.9, 123.9, 113.1 (Cq,  $\text{C}(\text{Me})_2$ ), 108.9 (Cq,  $\text{C}(\text{Me})_2$ ), 93.7 (C-1), 86.8 (Cq<sub>Boc</sub>), 86.3 (C-2), 85.7 (C-4), 81.4 (C-3), 74.0 (C-5), 66.2 (C-6), 27.7 ( $\text{CH}_3^{\text{Boc}}$ ), 26.8 ( $\text{CH}_3$ ), 26.2 ( $\text{CH}_3$ ), 25.2 ( $\text{CH}_3$ ), 24.3 ( $\text{CH}_3$ ); HRMS (ESI-TOF)  $m/z$  Calcd for  $\text{C}_{23}\text{H}_{36}\text{N}_3\text{O}_{11}\text{S}^+ [\text{M} + \text{NH}_4]^+$ : 562.2065, found: 562.2061.

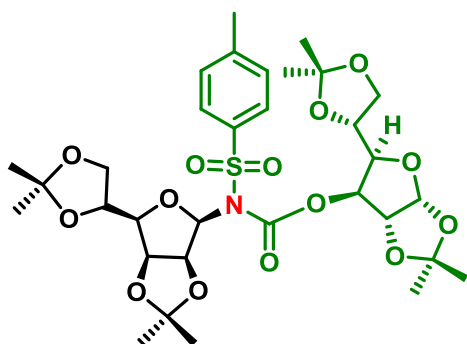

**(1,2;5,6-di-O-isopropylidene- $\alpha$ -D-glucufuranosyl) *N*-**

**(2,3;5,6-Di-O-isopropylidene- $\beta$ -D-mannofuranosyl) *N*-tosyl carbamate (3i).** Synthesized according to general procedure in 1 mmol scale, afforded **3i** (398 mg, yield 57%,  $\beta$  only); eluant, hexane-EtOAc (4:1); as a colorless syrup.  $^1\text{H}$  NMR (400 MHz,  $\text{CDCl}_3$ ):  $\delta$  7.80 (d,  $J =$



8.4 Hz, 2 H, Ar<sup>Ts</sup>), 7.33 (d,  $J = 8.1$  Hz, 2 H, Ar<sup>Ts</sup>), 6.27 (brs, 1 H, H-1), 5.70 (d,  $J = 3.6$  Hz, 1 H, H-1'), 5.31 (dd,  $J = 1.0, 6.1$  Hz, 1 H, H-2), 5.28 (d,  $J = 2.8$  Hz, 1 H), 5.04 (dd,  $J = 4.1, 6.1$  Hz, 1 H, H-3), 4.51 (dd,  $J = 4.2, 6.2$  Hz, 1 H, H-4), 4.39-4.34 (m, 1 H, H-5), 4.29 (d,  $J = 3.6$  Hz, 1 H), 4.10 (dd,  $J = 6.5, 8.7$  Hz, 1 H, H-6<sub>a</sub>), 4.02 (dd,  $J = 4.8, 8.8$  Hz, 1 H, H-6<sub>b</sub>), 3.96 (dd,  $J = 2.8, 8.9$  Hz, 1 H), 3.80-3.74 (m, 2 H, H-6'<sub>ab</sub>), 3.20-3.17 (m, 1 H), 2.45 (s, 3 H, CH<sub>3</sub><sup>Ts</sup>), 1.55 (s, 3 H, CH<sub>3</sub>), 1.46 (s, 3 H, CH<sub>3</sub>), 1.45 (s, 3 H, CH<sub>3</sub>), 1.38 (s, 3 H, CH<sub>3</sub>), 1.37 (s, 3 H, CH<sub>3</sub>), 1.34 (s, 3 H, CH<sub>3</sub>), 1.27 (s, 3 H, CH<sub>3</sub>), 1.20 (s, 3 H, CH<sub>3</sub>); <sup>13</sup>C NMR (100 MHz, CDCl<sub>3</sub>):  $\delta$  151.3 (C=O), 144.7, 137.0, 129.7, 127.7, 113.1 (Cq, C(Me)<sub>2</sub>), 112.6 (Cq, C(Me)<sub>2</sub>), 109.5 (Cq, C(Me)<sub>2</sub>), 109.0 (Cq, C(Me)<sub>2</sub>), 105.0 (C-1'), 94.1 (C-1), 86.5 (C-2), 85.8 (C-4), 82.9, 81.5 (C-3), 79.9, 79.1, 73.9 (C-5), 71.3, 67.5 (C-6'), 66.4 (C-6), 28.8 (CH<sub>3</sub>), 28.7 (CH<sub>3</sub>), 28.6 (CH<sub>3</sub>), 26.2 (CH<sub>3</sub>), 26.1 (CH<sub>3</sub>), 25.2 (CH<sub>3</sub>), 24.9 (CH<sub>3</sub>), 24.3 (CH<sub>3</sub>), 21.6 (CH<sub>3</sub><sup>Ts</sup>); HRMS (ESI-TOF)  $m/z$  Calcd for C<sub>32</sub>H<sub>49</sub>N<sub>2</sub>O<sub>14</sub>S<sup>+</sup> [M+ NH<sub>4</sub>]<sup>+</sup>: 717.2899, found: 717.2896.

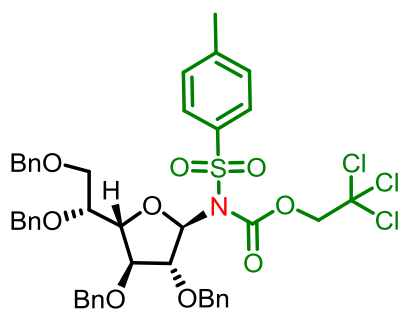

**2,3,5,6-Tetra-O-benzyl- $\beta$ -D-galactofuranosyl**

**2,2,2-**

**trichloroethyl tosylcarbamate (3j).** Synthesized according to general procedure in 1 mmol scale, afforded **3j** (702 mg, yield 81%,  $\beta$  =only); eluant, hexane-EtOAc (4:1); as a colorless syrup. <sup>1</sup>H NMR (400 MHz, CDCl<sub>3</sub>):  $\delta$  7.89 (d,  $J = 8.4$  Hz, 2 H, Ar<sup>Ts</sup>), 7.37-7.28 (m, 17 H, Ar), 7.25-7.23 (m, 3 H, Ar), 7.01 (d,  $J = 8.2$  Hz, 2 H, Ar<sup>Ts</sup>), 6.57 (d,  $J = 7.2$  Hz, 1 H, H-1), 4.94 (d,  $J = 11.3$  Hz, 1 H, PhCH<sub>2</sub>), 4.78-4.72 (m, 2 H, PhCH<sub>2</sub>), 4.69-4.58 (m, 5 H), 4.49-4.41 (m, 6 H), 3.98-3.97 (m, 1 H, H-5), 3.65 (dd,  $J = 6.4, 9.5$  Hz, 1 H, H-6<sub>a</sub>), 3.50 (dd,  $J = 6.0, 9.6$  Hz, 1 H, H-6<sub>b</sub>), 2.29 (s, 3 H, CH<sub>3</sub><sup>Ts</sup>); <sup>13</sup>C NMR (100 MHz, CDCl<sub>3</sub>):  $\delta$  152.2 (C=O), 144.4, 138.7, 138.6, 138.1, 137.6, 136.7, 129.7, 129.5, 128.5, 128.4, 128.3, 128.2, 128.1, 128.0,

127.9, 127.7, 127.6, 127.5, 93.8 (CCl<sub>3</sub>), 83.3 (C-1), 79.5, 75.9 (CH<sub>2</sub><sup>Troc</sup>), 75.2, 74.8, 74.6 (PhCH<sub>2</sub>), 74.4 (C-5), 74.1, 73.5, 73.4, 72.7 (PhCH<sub>2</sub>), 69.9 (C-6), 21.5 (CH<sub>3</sub><sup>Ts</sup>); HRMS (ESI-TOF) *m/z* Calcd for C<sub>44</sub>H<sub>48</sub>Cl<sub>3</sub>N<sub>2</sub>O<sub>9</sub>S<sup>+</sup> [M+ NH<sub>4</sub>]<sup>+</sup>: 885.2141, found: 885.2142.

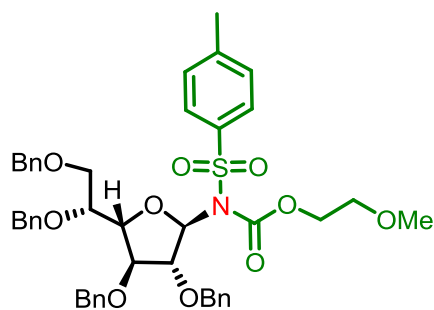

**2,3,5,6-Tetra-*O*-benzyl-β-D-galactofuranosyl 2-**

**methoxyethyl tosylcarbamate (3k).** Synthesized according to general procedure in 1 mmol scale, afforded **3k** (660 mg, yield 83%, α: β = 1:20); eluant, hexane-EtOAc (4:1); as a colorless syrup. <sup>1</sup>H NMR (400 MHz, CDCl<sub>3</sub>): δ 7.88-7.83 (m, 2 H), 7.36-7.22 (m, 20 H), 7.05-7.03 (m, 2 H), 5.47 (d, *J* = 9.0 Hz, 1 H, H-1), 4.98-4.92 (m, 1 H), 4.86-4.67 (m, 4 H), 4.64-4.56 (m, 2 H), 4.51-4.39 (m, 3 H), 4.14-4.04 (m, 2 H), 3.98-3.96 (m, 1 H), 3.77-3.74 (m, 1 H), 3.66-3.49 (m, 3 H, H-2, H-6<sub>ab</sub>), 3.35-3.26 (m, 2 H, CH<sub>2</sub>OMe), 3.11 (s, 3 H, OCH<sub>3</sub>), 2.33 (s, 3 H, CH<sub>3</sub><sup>Ts</sup>); <sup>13</sup>C NMR (100 MHz, CDCl<sub>3</sub>): δ 153.2 (C=O), 151.6, 144.1, 144.0, 138.9, 138.7, 138.4, 138.3, 138.2, 137.9, 137.8, 137.0, 136.7, 129.2, 129.1, 128.6, 128.4, 128.3, 128.2, 128.1, 128.0, 127.9, 127.8, 127.7, 127.6, 127.5, 127.4, 86.3 (C-1), 84.7, 82.7, 79.6, 76.0, 75.9, 75.6, 74.7, 74.6, 74.2, 74.1, 73.9, 73.5, 72.8, 72.7, 69.8, 69.7 (CH<sub>2</sub>OMe), 69.4, 68.6 (C-6), 66.1, 65.8 (OCH<sub>2</sub>), 58.7, 58.5 (OCH<sub>3</sub>), 21.6, 21.5 (CH<sub>3</sub><sup>Ts</sup>); HRMS (ESI-TOF) *m/z* Calcd for C<sub>45</sub>H<sub>53</sub>N<sub>2</sub>O<sub>10</sub>S<sup>+</sup> [M+ NH<sub>4</sub>]<sup>+</sup>: 813.3415, found: 813.3410.

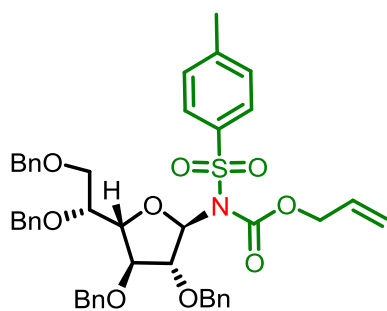

**2,3,5,6-Tetra-*O*-benzyl- $\beta$ -D-galactofuranosyl**

**allyl**

**tosylcarbamate (3l)**. Synthesized according to general procedure in 1 mmol scale, afforded **3l** (637 mg, yield 82%,  $\beta$  only); eluant, hexane-EtOAc (4:1); as a colorless syrup.  $^1\text{H}$  NMR (400 MHz,  $\text{CDCl}_3$ ):  $\delta$  7.82 (d,  $J = 8.2$  Hz, 2 H), 7.37-7.24 (m, 20 H), 7.04 (d,  $J = 8.2$  Hz, 2 H), 5.64-5.54 (m, 1 H, =CH), 5.47 (d,  $J = 7.2$  Hz, 1 H, H-1), 5.16-5.12 (m, 1 H, =CH<sub>2</sub>), 4.96 (d,  $J = 11.5$  Hz, 2 H, PhCH<sub>2</sub>, =CH<sub>2</sub>), 4.83-4.78 (m, 4 H), 4.67-4.65 (m, 1 H), 4.59 (d,  $J = 11.7$  Hz, 1 H), 4.51-4.43 (m, 3 H), 4.35-4.30 (m, 1 H), 3.96-3.95 (m, 1 H), 3.78-3.74 (m, 1 H), 3.67 (dd,  $J = 2.7, 9.3$  Hz, 1 H), 3.64-3.61 (m, 2 H), 2.33 (s, 3 H);  $^{13}\text{C}$  NMR (100 MHz,  $\text{CDCl}_3$ ):  $\delta$  163.5, 151.4, 144.2, 138.8, 138.2, 137.9, 136.6, 130.7 (=CH), 129.1, 128.6, 128.4, 128.2, 128.1, 127.9, 127.8, 127.7, 127.6, 127.5, 127.4, 118.9 (=CH<sub>2</sub>), 86.2 (C-1), 84.7, 76.1, 75.3, 74.8, 74.5, 73.8, 73.5, 72.9, 68.7 (C-6), 67.6 (OCH<sub>2</sub> allyl), 21.6 (CH<sub>3</sub><sup>Ts</sup>); HRMS (ESI-TOF)  $m/z$  Calcd for C<sub>45</sub>H<sub>51</sub>N<sub>2</sub>O<sub>9</sub>S<sup>+</sup> [M+ NH<sub>4</sub>]<sup>+</sup>: 795.3310, found: 795.3299.

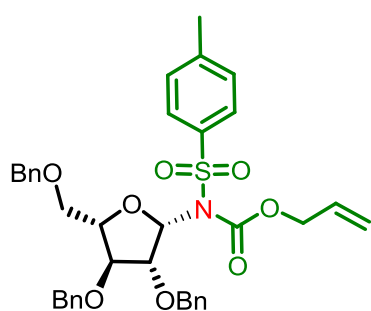

**2,3,5-Tri-*O*-benzyl- $\beta$ -L-arabinofuranosyl**

**allyl**

**tosylcarbamate (3m)**. Synthesized according to general procedure in 1 mmol scale, afforded **3m** (532 mg, yield 81%,  $\alpha$ :  $\beta = 1$ :30); eluant, hexane-EtOAc (4:1); as a colorless syrup.  $^1\text{H}$  NMR (400 MHz,  $\text{CDCl}_3$ ):  $\delta$  7.88 (d,  $J = 8.2$  Hz, 2 H), 7.36-7.26 (m, 15 H), 7.24-7.22 (m, 2 H), 6.25 (d,  $J = 5.6$  Hz, 1 H, H-1), 5.77-5.67 (m, 1 H, =CH), 5.23-5.15 (m, 2 H, =CH<sub>2</sub>), 5.01-

4.98 (m, 1 H, H-2), 4.76 (d,  $J = 11.5$  Hz, 1 H,  $\text{PhCH}_2$ ), 4.65 (d,  $J = 11.5$  Hz, 1 H,  $\text{PhCH}_2$ ), 4.59-4.51 (m, 6 H,  $\text{PhCH}_2$ ,  $\text{OCH}_{2\text{allyl}}$ ), 4.49-4.45 (m, 1 H, H-4), 4.19 (dd,  $J = 6.4, 8.6$  Hz, 1 H, H-3), 3.64 (dd,  $J = 2.5, 11.1$  Hz, 1 H, H-5<sub>a</sub>), 3.52 (dd,  $J = 4.9, 11.1$  Hz, 1 H, H-5<sub>b</sub>), 2.40 (s, 3 H,  $\text{CH}_3^{\text{Ts}}$ );  $^{13}\text{C}$  NMR (100 MHz,  $\text{CDCl}_3$ ):  $\delta$  151.5 (C=O), 144.6, 138.2, 138.0, 137.5, 136.5, 130.7 (=CH), 129.3, 128.6, 128.5, 128.4, 128.3, 128.2, 127.9, 127.8, 127.7, 127.6, 119.7(=CH<sub>2</sub>), 92.2 (C-1), 85.5 (C-2), 82.7 (C-3), 81.9 (C-4), 73.4 ( $\text{PhCH}_2$ ), 72.5 ( $\text{PhCH}_2$ ), 72.4 ( $\text{PhCH}_2$ ), 70.0 (C-5), 67.9 ( $\text{OCH}_{2\text{allyl}}$ ), 21.6 ( $\text{CH}_3^{\text{Ts}}$ ); HRMS (ESI-TOF)  $m/z$  Calcd for  $\text{C}_{37}\text{H}_{43}\text{N}_2\text{O}_8\text{S}^+$  [ $\text{M} + \text{NH}_4$ ] $^+$ : 675.2735, found: 675.2716.

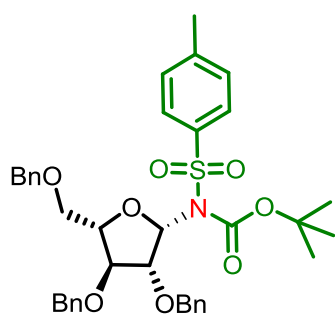

**2,3,5-Tri-*O*-benzyl- $\beta$ -L-arabinofuranosyl**

***tert*-butyl**

**tosylcarbamate (3n).** Synthesized according to general procedure in 1 mmol scale, afforded **3n** (444 mg, yield 66%,  $\alpha : \beta = 1:30$ ); eluant, hexane-EtOAc (4:1); as a pale yellow syrup.  $^1\text{H}$  NMR (400 MHz,  $\text{CDCl}_3$ ):  $\delta$  7.88 (d,  $J = 8.2$  Hz, 2 H), 7.39-7.36 (m, 2 H), 7.34-7.26 (m, 13 H), 7.24-7.21 (m, 2 H), 6.21 (d,  $J = 5.6$  Hz, 1 H, H-1), 5.03 (t,  $J = 5.9$  Hz, 1 H, H-2), 4.78 (d,  $J = 11.6$  Hz, 1 H,  $\text{PhCH}_2$ ), 4.68 (d,  $J = 11.5$  Hz, 1 H,  $\text{PhCH}_2$ ), 4.61-4.54 (m, 4 H,  $\text{PhCH}_2$ ), 4.52-4.49 (m, 1 H, H-4), 4.20 (dd,  $J = 6.4, 8.6$  Hz, 1 H, H-3), 3.67 (dd,  $J = 2.6, 11.1$  Hz, 1 H, H-5<sub>a</sub>), 3.54 (dd,  $J = 4.8, 11.1$  Hz, 1 H, H-5<sub>b</sub>), 2.40 (s, 3 H,  $\text{CH}_3^{\text{Ts}}$ ), 1.29 (s, 9 H,  $\text{CH}_3^{\text{Boc}}$ );  $^{13}\text{C}$  NMR (100 MHz,  $\text{CDCl}_3$ ):  $\delta$  150.2 (C=O), 144.1, 138.2, 138.1, 137.5, 137.4, 129.2, 128.5, 128.3, 128.0, 127.9, 127.7, 91.5 (C-1), 85.2 (C-2), 84.7 (C<sub>q</sub>,  $\text{Boc}$ ), 82.4 (C-3), 81.5 (C-4), 73.3 ( $\text{PhCH}_2$ ), 72.4 ( $\text{PhCH}_2$ ), 72.3 ( $\text{PhCH}_2$ ), 69.9 (C-5), 27.8 ( $\text{CH}_3^{\text{Boc}}$ ), 21.5 ( $\text{CH}_3^{\text{Ts}}$ ); HRMS (ESI-TOF)  $m/z$  Calcd for  $\text{C}_{38}\text{H}_{47}\text{N}_2\text{O}_8\text{S}^+$  [ $\text{M} + \text{NH}_4$ ] $^+$ : 691.3048, found: 691.3043.

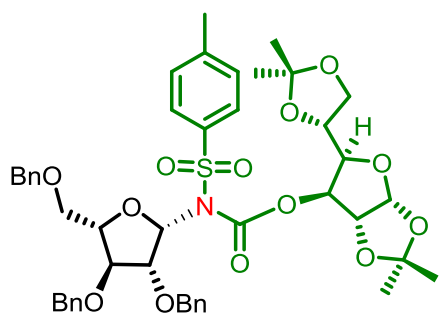

(1,2;5,6-di-*O*-isopropylidene- $\alpha$ -D-glucofuranosyl) *N*-

(2,3,5-tri-*O*-benzyl- $\beta$ -L-arabinofuranosyl) *N*-tosyl carbamate (**3o**). Synthesized according to general procedure in 1 mmol scale, afforded **3o** (644 mg, yield 75%,  $\alpha$ :  $\beta$  = 1:20); eluant, hexane-EtOAc (4:1); as a colorless syrup.  $^1\text{H}$  NMR (400 MHz,  $\text{CDCl}_3$ ):  $\delta$  7.87-7.84 (m, 2 H), 7.37-7.28 (m, 13 H), 7.27-7.23 (m, 4 H), 6.24 (d,  $J$  = 5.6, 1 H, H-1), 5.49 (d,  $J$  = 3.6, 1 H, H-1'), 5.28-5.20 (m, 1 H), 4.96-4.93 (m, 0.7 H), 4.78-4.72 (m, 1 H, H-2), 4.66-4.58 (m, 3 H), 4.56-4.43 (m, 4 H), 4.21 (dd,  $J$  = 6.1, 8.1 Hz, 0.7 H), 4.05-3.96 (m, 2.3 H), 3.92-3.79 (m, 3 H), 3.74-3.64 (m, 1 H, H-5<sub>a</sub>), 3.53 (dd,  $J$  = 4.9, 11.1 Hz, 1 H, H-5<sub>b</sub>), 2.41 (s, 3 H,  $\text{CH}_3^{\text{Ts}}$ ), 1.45 (s, 3 H,  $\text{CH}_3$ ), 1.35 (s, 3 H,  $\text{CH}_3$ ), 1.17 (s, 6 H,  $\text{CH}_3$ );  $^{13}\text{C}$  NMR (100 MHz,  $\text{CDCl}_3$ ):  $\delta$  150.2, 150.0 (C=O), 144.6, 144.4, 138.1, 138.0, 137.9, 137.6, 137.4, 136.9, 129.6, 129.5, 128.5, 128.4, 128.3, 128.1, 128.0, 127.9, 127.8, 127.7, 127.6, 112.3 (Cq,  $\text{C}(\text{Me})_2$ ), 109.4 (Cq,  $\text{C}(\text{Me})_2$ ), 104.9, 104.8 (C-1'), 91.9 (C-1), 86.6, 84.6, 84.2 (C-2), 83.7, 82.7, 82.3, 81.7, 80.2, 79.9, 79.7, 78.9, 78.7, 73.4, 73.3, 72.7, 72.5, 72.4, 71.6, 71.4, 71.3, 69.9 (C-5), 67.4 (C-6'), 26.9 ( $\text{CH}_3$ ), 26.6 ( $\text{CH}_3$ ), 26.1 ( $\text{CH}_3$ ), 25.1 ( $\text{CH}_3$ ), 21.6 ( $\text{CH}_3^{\text{Ts}}$ ); HRMS (ESI-TOF)  $m/z$  Calcd for  $\text{C}_{46}\text{H}_{57}\text{N}_2\text{O}_{13}\text{S}^+$  [ $\text{M} + \text{NH}_4$ ] $^+$ : 877.3576, found: 877.3561.

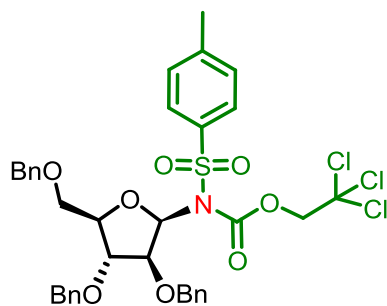

2,3,5-Tri-*O*-benzyl- $\beta$ -D-arabinofuranosyl

2,2,2-

trichloroethyl tosylcarbamate (**3p**). Synthesized according to general procedure in 1 mmol

scale, afforded **3p** (575 mg, yield 77%,  $\beta$  only); eluant, hexane-EtOAc (4:1); as a colorless syrup.  $^1\text{H}$  NMR (400 MHz,  $\text{CDCl}_3$ ):  $\delta$  7.93 (d,  $J = 8.2$  Hz, 2 H,  $\text{Ar}^{\text{Ts}}$ ), 7.34-7.28 (m, 13 H), 7.27-7.22 (m, 4 H), 6.28 (d,  $J = 5.7$  Hz, 1 H, H-1), 5.07 (t,  $J = 6.1$  Hz, 1 H, H-2), 4.77 (d,  $J = 11.6$  Hz, 1 H,  $\text{PhCH}_2$ ), 4.73-4.65 (m, 3 H,  $\text{PhCH}_2$ ), 4.64-4.59 (m, 1 H,  $\text{PhCH}_2$ ), 4.58-4.51 (m, 3 H,  $\text{PhCH}_2$ ,  $\text{OCH}_2^{\text{Troc}}$ ), 4.50-4.49 (m, 1 H, H-4), 4.22 (dd,  $J = 6.4, 8.2$  Hz, 1 H, H-3), 3.65 (dd,  $J = 2.6, 11.1$  Hz, 1 H, H-5<sub>a</sub>), 3.52 (dd,  $J = 5.1, 11.1$  Hz, 1 H, H-5<sub>b</sub>), 2.39 (s, 3 H,  $\text{CH}_3^{\text{T}}$ );  $^{13}\text{C}$  NMR (100 MHz,  $\text{CDCl}_3$ ):  $\delta$  150.7 (C=O), 144.9, 138.1, 137.9, 137.4, 136.2, 129.5, 128.6, 128.5, 128.4, 128.3, 128.2, 128.0, 127.9, 127.8, 127.7, 127.6, 93.1 ( $\text{CCl}_3$ ), 92.4 (C-1), 84.9 (C-2), 82.4 (C-3), 81.8 (C-4), 75.9 ( $\text{PhCH}_2$ ), 73.4 ( $\text{PhCH}_2$ ), 72.6 ( $\text{OCH}_2^{\text{Troc}}$ ), 72.5 ( $\text{PhCH}_2$ ), 69.9 (C-5), 21.7 ( $\text{CH}_3^{\text{Ts}}$ ); HRMS (ESI-TOF)  $m/z$  Calcd for  $\text{C}_{36}\text{H}_{40}\text{Cl}_3\text{N}_2\text{O}_8\text{S}^+$  [ $\text{M} + \text{NH}_4$ ] $^+$ : 765.1565, found: 765.1567.

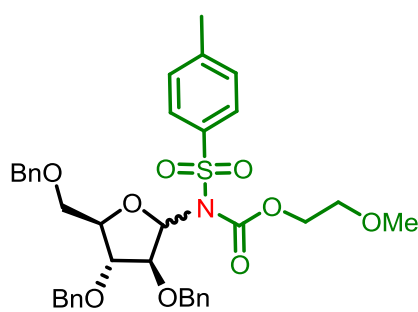

**2,3,5-Tri-O-benzyl- $\alpha/\beta$ -D-arabinofuranosyl**

**2-**

**methoxyethyl tosylcarbamate (3q).** Synthesized according to general procedure in 1 mmol scale, afforded **3q** (527 mg, yield 78%,  $\alpha$ :  $\beta = 1:2$ ); eluant, hexane-EtOAc (4:1); as a colorless syrup.  $^1\text{H}$  NMR (400 MHz,  $\text{CDCl}_3$ ):  $\delta$  7.95-7.89 (m, 2 H), 7.36-7.25 (m, 16 H), 7.22-7.19 (m, 1 H), 6.85 (d,  $J = 5.5$  Hz, 1 H, H-1), 5.01-4.99 (m, 0.5 H), 4.78-4.69 (m, 1 H), 4.68-4.60 (m, 1 H), 4.59-4.54 (m, 3 H), 4.52-4.48 (m, 1 H), 4.46-4.39 (m, 1 H), 4.37-4.33 (m, 0.5 H), 4.20-4.16 (m, 1.5 H), 4.13-4.05 (m, 1 H), 4.02-3.97 (m, 0.5 H), 3.78-3.74 (m, 0.5 H), 3.69-3.62 (m, 1 H), 3.54-3.49 (m, 0.5 H), 3.46-3.42 (m, 1 H), 3.34-3.32 (m, 1 H), 3.22 (s, 3 H,  $\text{OCH}_3$ ), 2.40 (s, 3 H,  $\text{CH}_3^{\text{Ts}}$ );  $^{13}\text{C}$  NMR (100 MHz,  $\text{CDCl}_3$ ):  $\delta$  163.4, 151.8, 151.7, 144.6, 144.4, 138.2, 138.1, 138.0, 137.5, 137.2, 136.9, 136.5, 129.3, 128.6, 128.5, 128.4, 128.3,

128.2, 127.9, 127.8, 127.7, 127.6, 127.5, 92.1 (C-1), 85.5, 85.4 (C-2), 84.0, 83.1, 82.6, 81.7, 79.4, 73.4, 73.3, 73.2, 72.5, 72.4, 70.9, 70.0 (C-5), 69.7, 69.6 (CH<sub>2</sub>OMe), 66.3, 65.9, 58.7, 58.5 (OCH<sub>3</sub>), 21.7 (CH<sub>3</sub><sup>Ts</sup>); HRMS (ESI-TOF) *m/z* Calcd for C<sub>37</sub>H<sub>45</sub>N<sub>2</sub>O<sub>9</sub>S<sup>+</sup> [M+ NH<sub>4</sub>]<sup>+</sup>: 693.2840, found: 693.2820.

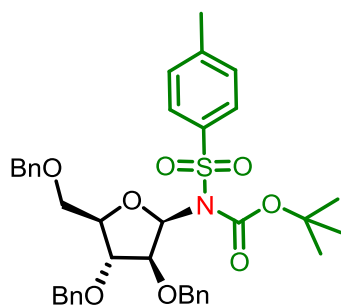

**2,3,5-Tri-*O*-benzyl- $\beta$ -D-arabinofuranosyl**

***tert*-butyl**

**tosylcarbamate (3r).** Synthesized according to general procedure in 1 mmol scale, afforded **3r** (457 mg, yield 68%,  $\alpha$ :  $\beta$  = 1:30); eluant, hexane-EtOAc (4:1); as a pale syrup. <sup>1</sup>H NMR (400 MHz, CDCl<sub>3</sub>):  $\delta$  7.88 (d, *J* = 8.2 Hz, 2 H), 3.39-3.36 (m, 3 H), 7.35-7.32 (m, 5 H), 7.31-7.22 (m, 9 H), 6.22 (d, *J* = 5.7 Hz, 1 H, H-1), 5.04 (t, *J* = 6.1 Hz, 1 H, H-2), 4.78 (d, *J* = 11.6 Hz, 1 H, PhCH<sub>2</sub>), 4.68 (d, *J* = 11.6 Hz, 1 H, PhCH<sub>2</sub>), 4.62-4.57 (m, 3 H, PhCH<sub>2</sub>), 4.55-4.51 (m, 2 H, PhCH<sub>2</sub>, H-4), 4.20 (dd, *J* = 6.4, 8.2 Hz, 1 H, H-3), 3.67 (dd, *J* = 2.6, 11.1 Hz, 1 H, H-5<sub>a</sub>), 3.54 (dd, *J* = 4.9, 11.1 Hz, 1 H, H-5<sub>a</sub>), 2.39 (s, 3 H, CH<sub>3</sub><sup>Ts</sup>), 1.29 (s, 9 H, CH<sub>3</sub><sup>Boc</sup>); <sup>13</sup>C NMR (100 MHz, CDCl<sub>3</sub>):  $\delta$  150.3 (C=O), 144.1, 138.3, 138.1, 137.6, 137.4, 129.2, 128.5, 128.4, 128.3, 128.2, 128.0, 127.9, 127.7, 127.6, 91.6 (C-1), 85.2 (Cq<sub>Boc</sub>), 84.8 (C-2), 82.5 (C-3), 81.5 (C-4), 73.4 (PhCH<sub>2</sub>), 72.4 (PhCH<sub>2</sub>), 72.3 (PhCH<sub>2</sub>), 70.0 (C-5), 27.8 (CH<sub>3</sub><sup>Boc</sup>), 21.6 (CH<sub>3</sub><sup>Ts</sup>); HRMS (ESI-TOF) *m/z* Calcd for C<sub>38</sub>H<sub>47</sub>N<sub>2</sub>O<sub>8</sub>S<sup>+</sup> [M+ NH<sub>4</sub>]<sup>+</sup>: 691.3048, found: 691.3040.

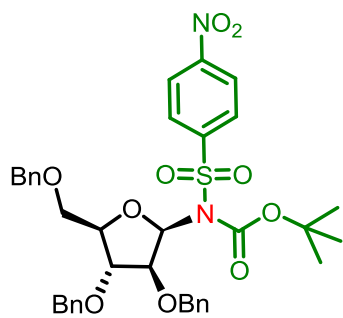

**2,3,5-Tri-*O*-benzyl- $\beta$ -D-arabinofuranosyl *tert*-butyl *N*-(4-**

**nitrophenyl)sulfonylcarbamate (3s).** Synthesized according to general procedure in 1 mmol scale, afforded **3s** (472 mg, yield 67%,  $\alpha$ :  $\beta$  = 1:20); eluant, hexane-EtOAc (4:1); as a pale syrup.  $^1\text{H}$  NMR (400 MHz,  $\text{CDCl}_3$ ):  $\delta$  8.24-8.16 (m, 4 H), 7.38-7.36 (m, 4 H), 7.34-7.30 (m, 9 H), 7.27-7.25 (m, 2 H), 6.17 (d,  $J$  = 5.6 Hz, 1 H, H-1), 5.04 (t,  $J$  = 6.1 Hz, 1 H, H-2), 4.77 (d,  $J$  = 11.6 Hz, 1 H,  $\text{PhCH}_2$ ), 4.65 (dd,  $J$  = 11.8 Hz, 2 H,  $\text{PhCH}_2$ ), 4.6.0-4.50 (m, 4 H,  $\text{PhCH}_2$ , H-4), 4.21 (dd,  $J$  = 6.5, 8.2 Hz, 1 H, H-3), 3.67 (dd,  $J$  = 2.5, 11.1 Hz, 1 H, H-5<sub>a</sub>), 3.54 (dd,  $J$  = 4.9, 10.8 Hz, 1 H, H-5<sub>b</sub>), 1.31 (s, 9 H,  $\text{CH}_3^{\text{Boc}}$ );  $^{13}\text{C}$  NMR (100 MHz,  $\text{CDCl}_3$ ):  $\delta$  150.3 (C=O), 149.8, 145.8, 138.0, 137.9, 137.3, 129.4, 128.6, 128.5, 128.4, 128.2, 128.1, 128.0, 127.9, 127.8, 127.7, 123.9, 91.9 (C-1), 86.4 (C<sub>q</sub> <sup>Boc</sup>), 84.8 (C-2), 82.3 (C-3), 81.6 (C-4), 73.5 ( $\text{PhCH}_2$ ), 72.5 ( $\text{PhCH}_2$ ), 72.4 ( $\text{PhCH}_2$ ), 69.9 (C-5), 27.8 ( $\text{CH}_3^{\text{Boc}}$ ); HRMS (ESI-TOF)  $m/z$  Calcd for  $\text{C}_{37}\text{H}_{44}\text{N}_3\text{O}_{10}\text{S}^+$  [ $\text{M} + \text{NH}_4$ ] $^+$ : 772.2742, found: 772.2740.

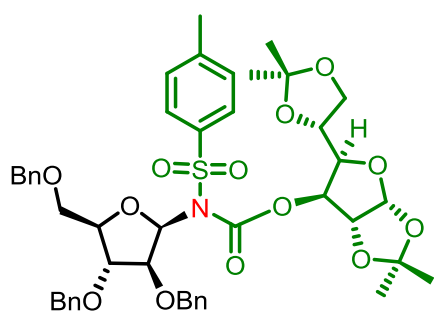

**(1,2;5,6-di-*O*-isopropylidene- $\alpha$ -D-glucofuranosyl) *N*-**

**(2,3,5-tri-*O*-benzyl- $\beta$ -D-arabinofuranosyl) *N*-tosyl carbamate (3t).** Synthesized according to general procedure in 1 mmol scale, afforded **3t** (618 mg, yield 72%,  $\alpha$ :  $\beta$  = 1:20); eluant, hexane-EtOAc (4:1); as a colorless syrup.  $^1\text{H}$  NMR (400 MHz,  $\text{CDCl}_3$ ):  $\delta$  7.85 (d,  $J$  = 8.3 Hz, 2 H), 7.37-7.30 (m, 10 H), 7.29-7.25 (m, 7 H), 6.24 (d,  $J$  = 5.6 Hz, 1 H, H-1), 5.66 (d,  $J$  = 3.6



Hz, 1 H, H-1'), 5.27 (d,  $J = 2.8$  Hz, 1 H), 5.09 (dd,  $J = 5.9, 6.2$  Hz, 1 H, H-2), 4.75 (d,  $J = 11.7$  Hz, 1 H, PhCH<sub>2</sub>), 5.68 (d,  $J = 11.6$  Hz, 1 H, PhCH<sub>2</sub>), 4.62-4.58 (m, 2 H, PhCH<sub>2</sub>), 4.56-4.59 (m, 3 H, PhCH<sub>2</sub>, H-4), 4.22-4.19 (m, 2 H), 4.04 (dd,  $J = 2.8, 8.7$  Hz, 1 H, H-3), 3.82-3.76 (m, 2 H, H-6'), 3.74-3.68 (m, 1 H), 3.65 (dd,  $J = 2.6, 11.1$  Hz, 1 H, H-5<sub>a</sub>), 3.52 (dd,  $J = 5.2, 11.1$  Hz, 1 H, H-5<sub>b</sub>), 2.41 (s, 3 H, CH<sub>3</sub><sup>Ts</sup>), 1.46 (s, 3 H, CH<sub>3</sub>), 1.31 (s, 3 H, CH<sub>3</sub>), 1.24 (s, 3 H, CH<sub>3</sub>), 1.14 (s, 3 H, CH<sub>3</sub>); <sup>13</sup>C NMR (100 MHz, CDCl<sub>3</sub>):  $\delta$  150.7 (C=O), 144.6, 138.1, 137.9, 137.5, 136.9, 129.5, 128.5, 128.4, 128.3, 128.2, 128.1, 127.9, 127.8, 127.7, 127.6, 112.4 (Cq, C(Me)<sub>2</sub>), 109.4 (Cq, C(Me)<sub>2</sub>), 104.9 (C-1'), 92.4 (C-1), 85.6 (C-2), 82.9, 82.4, 81.7, 79.9, 79.3, 73.4 (PhCH<sub>2</sub>), 72.7 (PhCH<sub>2</sub>), 72.6 (PhCH<sub>2</sub>), 71.5, 70.0 (C-5), 67.5 (C-6'), 26.8 (CH<sub>3</sub>), 26.7 (CH<sub>3</sub>), 26.2 (CH<sub>3</sub>), 25.0 (CH<sub>3</sub>), 21.6 (CH<sub>3</sub><sup>Ts</sup>); HRMS (ESI-TOF)  $m/z$  Calcd for C<sub>46</sub>H<sub>57</sub>N<sub>2</sub>O<sub>13</sub>S<sup>+</sup> [M+ NH<sub>4</sub>]<sup>+</sup>: 877.3576, found: 877.3559.

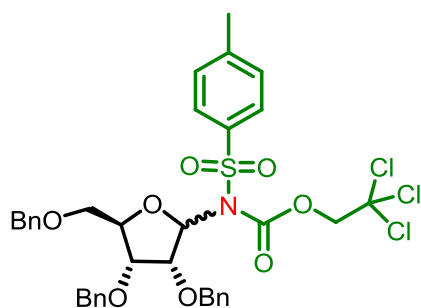

**2,3,5-Tri-*O*-benzyl- $\alpha/\beta$ -D-ribofuranosyl**

**2,2,2-**

**trichloroethyl tosylcarbamate (3u).** Synthesized according to general procedure in 1 mmol scale, afforded **3u** (536 mg, yield 75%,  $\alpha : \beta = 1:2.3$ ); eluant, hexane-EtOAc (4:1); as a pale yellow syrup. <sup>1</sup>H NMR (400 MHz, CDCl<sub>3</sub>):  $\delta$  7.88 (d,  $J = 8.2$  Hz, 2 H), 7.45-7.43 (m, 1 H), 7.37-7.24 (m, 14 H), 7.18-7.14 (m, 2 H), 6.25 (d,  $J = 3.2$  Hz, 0.3 H), 6.07 (d,  $J = 9.1$  Hz, 0.7 H, H-1), 4.91 (brs, 1 H), 4.82-4.59 (m, 2 H), 4.57-4.49 (m, 3 H), 4.47-4.40 (m, 2 H), 4.32-4.19 (m, 2 H), 4.09-4.02 (m, 1 H), 3.90-3.69 (m, 1 H), 3.64-3.56 (m, 1 H), 2.34 (s, 3 H, CH<sub>3</sub><sup>Ts</sup>); <sup>13</sup>C NMR (100 MHz, CDCl<sub>3</sub>):  $\delta$  150.6, 150.2 (C=O), 144.9, 144.5, 138.9, 138.1, 137.9, 137.8, 137.2, 136.4, 136.1, 129.4, 129.2, 128.7, 128.6, 128.5, 128.4, 128.2, 127.9, 127.8, 127.7, 127.6, 127.4, 93.8 (CCl<sub>3</sub>), 92.9, 83.7, 80.8, 77.8, 75.8, 75.7, 75.6, 74.9, 74.1,

73.7, 73.3, 72.4, 72.1, 71.5, 71.1, 69.6, 64.4, 21.6 ( $\text{CH}_3^{\text{Ts}}$ ); HRMS (ESI-TOF)  $m/z$  Calcd for  $\text{C}_{36}\text{H}_{40}\text{Cl}_3\text{N}_2\text{O}_8\text{S}^+$  [ $\text{M} + \text{NH}_4$ ] $^+$ : 765.1565, found: 765.1567.

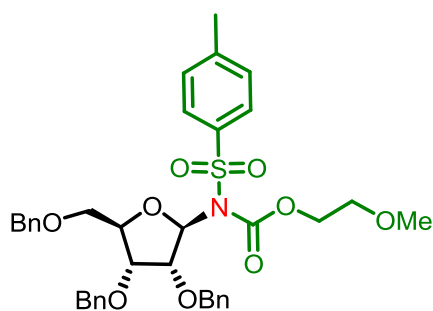

**2,3,5-Tri-O-benzyl- $\beta$ -D-ribofuranosyl 2-methoxyethyl**

**tosylcarbamate (3v).** Synthesized according to general procedure in 1 mmol scale, afforded

**3v** (513 mg, yield 76%,  $\beta$  only); eluant, hexane-EtOAc (4:1); as a colorless syrup.  $^1\text{H}$  NMR

(400 MHz,  $\text{CDCl}_3$ ):  $\delta$  7.84 (d,  $J = 8.3$  Hz, 2 H), 7.44-7.42 (m, 2 H), 7.36-7.24 (m, 11 H), 7.13

(d,  $J = 8.1$  Hz, 4 H), 6.00 (d,  $J = 9.0$  Hz, 1 H, H-1), 4.89 (brs, 2 H,  $\text{OCH}_2$ ), 4.53 (ABq,  $J =$

12.1 Hz, 2 H,  $\text{PhCH}_2$ ), 4.50-4.37 (m, 2 H), 4.30-4.27 (m, 2 H), 4.12-4.08 (m, 2 H), 4.06-4.01

(m, 1 H), 3.90 (dd,  $J = 4.9, 10.4$  Hz, 1 H, H-5<sub>a</sub>), 3.59-3.56 (m, 1 H, H-5<sub>b</sub>), 3.38-3.36 (m, 2 H,

$\text{CH}_2\text{OMe}$ ), 3.18 (s, 3 H,  $\text{OCH}_3$ ), 2.37 (s, 3 H,  $\text{CH}_3^{\text{Ts}}$ );  $^{13}\text{C}$  NMR (100 MHz,  $\text{CDCl}_3$ ):  $\delta$  151.8,

144.1, 139.1, 138.0, 137.9, 136.9, 130.9, 129.1, 128.6, 128.5, 128.3, 128.2, 127.8, 127.7,

127.5, 127.4, 127.3, 83.5 (C-1), 75.4, 75.2, 74.1, 71.4, 69.7 ( $\text{CH}_2\text{OMe}$ ), 65.9, 64.5 (C-5), 58.6

( $\text{OCH}_3$ ), 21.6 ( $\text{CH}_3^{\text{Ts}}$ ); HRMS (ESI-TOF)  $m/z$  Calcd for  $\text{C}_{37}\text{H}_{45}\text{N}_2\text{O}_9\text{S}^+$  [ $\text{M} + \text{NH}_4$ ] $^+$ : 693.2840,

found: 693.2840.

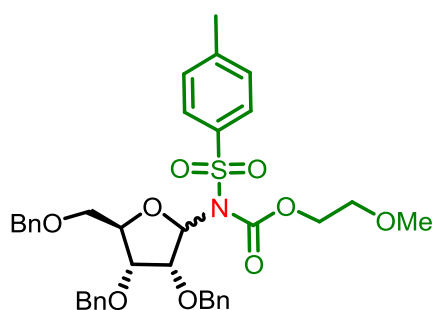

**2,3,5-Tri-O-benzyl- $\alpha/\beta$ -D-ribofuranosyl 2-methoxyethyl tosylcarbamate (3v').**

Synthesized according to general procedure in 1 mmol scale, afforded **3v** (486 mg, yield

72%,  $\alpha:\beta$  1:2.6); eluant, hexane-EtOAc (4:1); as a colorless syrup.  $^1\text{H}$  NMR (400 MHz,  $\text{CDCl}_3$ ):  $\delta$  7.94-7.83 (m, 2 H), 7.44-7.41 (m, 2 H), 7.36-7.28 (m, 11 H), 7.26-7.24 (m, 2 H), 7.14-7.12 (m, 2 H), 6.30 (d,  $J = 5.2$  Hz, 1 H, H-1 $\alpha$ ), , 6.00 (d,  $J = 9.0$  Hz, 1 H, H-1 $\beta$ ), 4.89-4.87 (m, 1.5 H), 4.83-4.78 (m, 0.5 H), 4.69-4.58 (m, 1.6 H), 4.58-4.53 (m, 3 H), 4.51-4.46 (m, 2 H), 4.32-4.27 (m, 1.6 H), 4.18-4.04 (m, 2.4 H), 4.08-3.96 (m, 2 H), 3.94-3.88 (m, 1 H), 3.75-3.65 (m, 0.6 H), 3.61-3.47 (m, 1.5 H), 3.39-3.31 (m, 2 H,  $\text{CH}_2\text{OMe}$ ), 3.18 (s, 3 H,  $\text{OCH}_3$ ), 2.37 (s, 3 H,  $\text{CH}_3^{\text{Ts}}$ );  $^{13}\text{C}$  NMR (100 MHz,  $\text{CDCl}_3$ ):  $\delta$  152.3, 151.8, 144.4, 144.1, 139.0, 138.2, 138.0, 137.9, 137.7, 137.4, 136.8, 129.3, 129.0, 128.8, 128.6, 128.5, 128.4, 128.3, 128.2, 128.0, 127.9, 127.8, 127.7, 127.6, 127.5, 127.4, 127.3, 88.8, 83.5, 80.1, 77.8, 77.5, 77.2, 75.5, 75.2, 74.4, 74.1, 72.7, 72.5, 71.4, 70.3, 69.7, 69.6, ( $\text{CH}_2\text{OMe}$ ), 65.9, 65.6, 64.5, 64.4 (C-5), 58.6, 58.5 ( $\text{OCH}_3$ ), 21.6 ( $\text{CH}_3^{\text{Ts}}$ ); HRMS (ESI-TOF)  $m/z$  Calcd for  $\text{C}_{37}\text{H}_{45}\text{N}_2\text{O}_9\text{S}^+ [\text{M} + \text{NH}_4]^+$ : 693.2840, found: 693.2840.

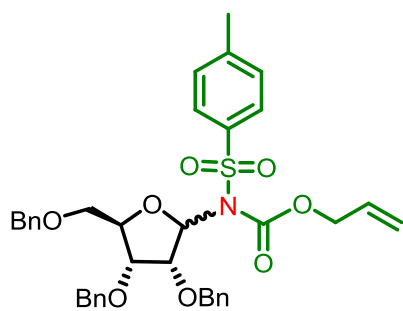

**2,3,5-Tri-O-benzyl- $\alpha/\beta$ -D-ribofuranosyl**

**allyl**

**tosylcarbamate (3w)**. Synthesized according to general procedure in 1 mmol scale, afforded **3w** (552 mg, yield 84%,  $\alpha:\beta = 1:3.8$ ); eluant, hexane-EtOAc (4:1); as a colorless syrup.  $^1\text{H}$  NMR (400 MHz,  $\text{CDCl}_3$ ):  $\delta$  7.91-7.81(m, 2 H), 7.45-7.43 (m, 1 H), 7.35-7.24 (m, 14 H), 7.15-7.13 (m, 2 H), 6.30 (d,  $J = 5.3$  Hz, 0.2 H), 6.01 (d,  $J = 9.0$  Hz, 0.8 H, H-1), 5.70-5.59 (m, 1 H, =CH), 5.17-5.05 (m, 2 H, =CH<sub>2</sub>), 4.93-4.88 (m, 2 H), 4.61-4.53 (m, 3 H), 4.49-4.39 (m, 3 H), 4.29-4.14 (m, 2 H), 4.06-4.00 (m, 1 H), 3.93-3.88 (m, 0.7 H), 3.73-3.69 (m, 0.3 H), 3.61-3.50 (m, 1 H), 2.37 (s, 3 H,  $\text{CH}_3^{\text{Ts}}$ );  $^{13}\text{C}$  NMR (100 MHz,  $\text{CDCl}_3$ ):  $\delta$  163.5, 144.2, 138.9,

137.9, 137.8, 137.6, 136.9, 136.8, 131.3, 130.7 (=CH), 129.3, 129.1, 128.8, 128.5, 128.4, 128.3, 128.2, 127.9, 127.8, 127.7, 127.6, 127.5, 127.4, 119.1(=CH<sub>2</sub> Allyl), 88.9, 83.4 (C-1), 80.3, 75.2, 74.4, 74.1, 74.0, 73.4, 72.8, 71.4, 71.3, 68.8, 67.7, 67.6, 64.5, 21.6 (CH<sub>3</sub><sup>Ts</sup>); HRMS (ESI-TOF) *m/z* Calcd for C<sub>37</sub>H<sub>43</sub>N<sub>2</sub>O<sub>8</sub>S<sup>+</sup> [M+ NH<sub>4</sub>]<sup>+</sup>: 675.2735, found: 675.2723.

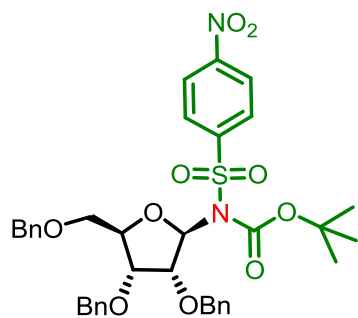

**2,3,5-Tri-*O*-benzyl- $\beta$ -D-ribofuranosyl *tert*-butyl *N*-(4-nitrophenyl)sulfonylcarbamate (3x).** Synthesized according to general procedure in 1 mmol scale, afforded **3x** (458 mg, yield 65%,  $\beta$  only); eluant, hexane-EtOAc (4:1); as a colorless syrup. <sup>1</sup>H NMR (400 MHz, CDCl<sub>3</sub>):  $\delta$  8.01-7.96 (m, 4 H), 7.45-7.44 (m, 2 H), 7.39-7.26 (m, 11 H), 7.14-7.11 (m, 2 H), 5.92 (d, *J* = 9.1 Hz, 1 H, H-1), 4.98 (d, *J* = 12.1 Hz, 1 H, PhCH<sub>2</sub>), 4.89 (d, *J* = 12.1 Hz, 1 H), 4.58 (ABq, *J* = 12.2 Hz, 2 H), 4.54-4.49 (m, 1 H), 4.37-4.31 (m, 2 H), 4.28-4.20 (m, 1 H), 4.08-3.96 (m, 2 H, H-5), 3.68-3.63 (m, 1 H), 1.31 (s, 9 H, CH<sub>3</sub><sup>Boc</sup>); <sup>13</sup>C NMR (100 MHz, CDCl<sub>3</sub>):  $\delta$  149.9, 146.0, 138.9, 137.9, 137.3, 129.0, 128.6, 128.4, 128.3, 128.1, 128.0, 127.9, 127.7, 127.5, 127.4, 123.5, 85.9, 83.5 (tert-C<sup>Boc</sup>), 75.4, 74.2, 73.9, 71.6, 71.5, 64.7 (C-5), 27.8 (CH<sub>3</sub><sup>Boc</sup>); HRMS (ESI-TOF) *m/z* Calcd for C<sub>37</sub>H<sub>44</sub>N<sub>3</sub>O<sub>10</sub>S<sup>+</sup> [M+ NH<sub>4</sub>]<sup>+</sup>: 722.2742, found: 722.2742.

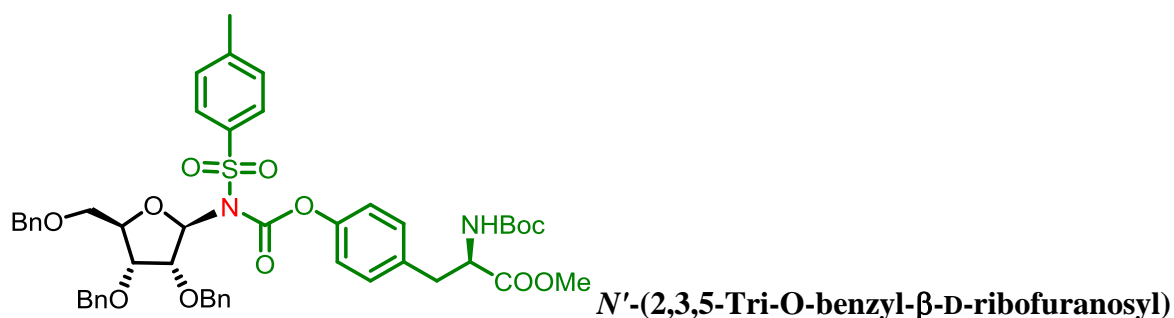

***N'*-(2,3,5-Tri-*O*-benzyl- $\beta$ -D-ribofuranosyl) *N'*-tosyl *O*-(*N*-Boc-tyrosine methyl ester) carbamate (3y).** Synthesized according to

general procedure in 1 mmol scale, afforded **3y** (572 mg, yield 64%,  $\alpha:\beta = 1:20$ ); eluant, hexane-EtOAc (4:1); as a pale syrup.  $^1\text{H}$  NMR (400 MHz,  $\text{CDCl}_3$ ):  $\delta$  7.85(d,  $J = 8.1$  Hz, 2 H), 7.45-7.43 (m, 2 H), 7.36-7.25 (m, 12 H), 7.15-7.13 (m, 3 H), 7.01 (d,  $J = 8.3$  Hz, 2 H), 6.69 (d,  $J = 8.3$  Hz, 2 H), 6.09 (d,  $J = 9.0$  Hz, 1 H, H-1), 4.91 (brs, 2 H), 4.61-4.41 (m, 5 H,  $\text{PhCH}_2$ ,  $\text{CH-NH}$ ), 4.34-4.31 (m, 2 H), 4.09-4.05 (m, 1 H, H-5<sub>a</sub>), 3.94 (dd,  $J = 4.9, 10.2$  Hz, 1 H, H-5<sub>b</sub>), 3.68 (s, 3 H,  $\text{OCH}_3$ ), 3.63-3.59 (m, 1 H), 3.09-2.97(m, 2 H,  $\text{CH}_2$ ), 2.39 (s, 3 H,  $\text{CH}_3^{\text{Ts}}$ ), 1.41 (s, 9 H,  $\text{CH}_3^{\text{Boc}}$ );  $^{13}\text{C}$  NMR (100 MHz,  $\text{CDCl}_3$ ):  $\delta$  172.6, 172.1, 155.1, 148.8, 144.5, 143.5, 138.9, 137.9, 137.7, 136.7, 134.3, 130.4, 130.3, 129.9, 129.7, 129.3, 128.7, 128.5, 128.4, 128.3, 128.2, 127.9, 127.8, 127.7, 127.6, 127.5, 127.4, 126.4, 121.2, 115.5, 83.8 (C-1), 80.1 (tert-C<sup>Boc</sup>), 75.3, 74.1, 73.9, 71.5, 64.6 (C-5), 54.6, 54.3 (CH-NH), 52.3, 52.2 ( $\text{OCH}_3$ ), 37.5 ( $\text{CH}_2$ ), 28.3 ( $\text{CH}_3^{\text{Boc}}$ ), 21.7, 21.5 ( $\text{CH}_3^{\text{Ts}}$ ); HRMS (ESI-TOF)  $m/z$  Calcd for  $\text{C}_{49}\text{H}_{58}\text{N}_3\text{O}_{12}\text{S}^+ [\text{M} + \text{NH}_4]^+$ : 912.3736, found: 912.3732.

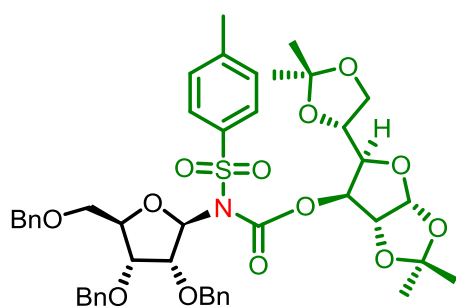

(1,2;5,6-di-*O*-isopropylidene- $\beta$ -D-glucofuranosyl) *N*-

(2,3,5-tri-*O*-benzyl- $\beta$ -D-ribofuranosyl) *N*-tosyl carbamate (**3z**). Synthesized according to general procedure in 1 mmol scale, afforded **3z** (506 mg, yield 59%,  $\beta$  only); eluant, hexane-EtOAc (4:1); as a colorless syrup.  $^1\text{H}$  NMR (400 MHz,  $\text{CDCl}_3$ ):  $\delta$  7.81 (d,  $J = 8.1$  Hz, 2 H), 7.44-7.42 (m, 2 H), 7.34-7.25 (m, 13 H), 7.17-7.15 (m, 2 H), 5.99 (d,  $J = 9.1$  Hz, 1 H, H-1), 5.63 (d,  $J = 2.7$  Hz, 1 H, H-1'), 5.26 (d,  $J = 2.6$  Hz, 1 H), 4.89 (brs, 2 H), 4.59-4.45 (m, 5 H), 4.20-4.18 (m, 2 H), 4.07-4.01 (m, 1 H), 3.97 (dd,  $J = 2.5, 8.7$  Hz, 1 H), 3.94-3.89 (m, 1 H), 3.85-3.76 (m, 2 H), 3.59-3.56 (m, 1 H), 3.39-3.36 (m, 1 H), 2.39 (s, 3 H,  $\text{CH}_3^{\text{Ts}}$ ), 1.45 (s, 3 H,  $\text{CH}_3$ ), 1.28 (s, 3 H,  $\text{CH}_3$ ), 1.21 (s, 3 H,  $\text{CH}_3$ ), 1.00 (s, 3 H,  $\text{CH}_3$ );  $^{13}\text{C}$  NMR (100 MHz,

CDCl<sub>3</sub>):  $\delta$  163.6, 144.3, 138.9, 137.9, 137.6, 137.4, 129.4, 128.5, 128.4, 128.2, 128.1, 127.9, 127.8, 127.5, 127.4, 126.9, 112.4 (Cq, C(Me)<sub>2</sub>), 109.4 (Cq, C(Me)<sub>2</sub>), 105.1 (C-1'), 91.9, 83.7, 82.6, 95.6, 78.7, 75.2, 74.5, 74.2 (PhCH<sub>2</sub>), 71.6 (PhCH<sub>2</sub>), 71.5 (PhCH<sub>2</sub>), 71.3, 67.3 (C-6'), 64.4 (C-5), 26.9 (CH<sub>3</sub>), 26.6 (CH<sub>3</sub>), 26.0 (CH<sub>3</sub>), 24.9 (CH<sub>3</sub>), 21.6 (CH<sub>3</sub><sup>Ts</sup>); HRMS (ESI-TOF)  $m/z$  Calcd for C<sub>46</sub>H<sub>57</sub>N<sub>2</sub>O<sub>13</sub>S<sup>+</sup> [M+ NH<sub>4</sub>]<sup>+</sup>: 877.3576, found: 877.3552.

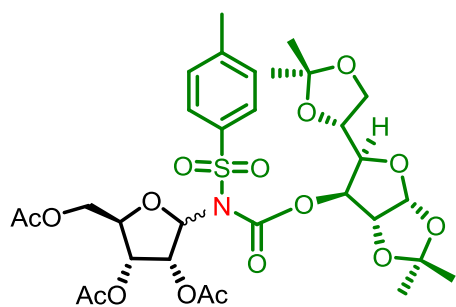

(1,2;5,6-di-O-isopropylidene- $\alpha$ -D-glucofuranosyl) N-

(2,3,5-tri-O-acetyl- $\alpha/\beta$ -D-ribofuranosyl) N-tosyl carbamate (**3aa**). Synthesized according

to general procedure in 1 mmol scale, afforded **3aa** (357 mg, yield 50%,  $\alpha$ :  $\beta$  = 1:1.5); eluant,

hexane-EtOAc (4:1); as a colorless syrup. <sup>1</sup>H NMR (400 MHz, CDCl<sub>3</sub>):  $\delta$  7.84 (d,  $J$  = 8.3 Hz,

2 H, Ar<sup>Ts</sup>), 7.34 (d,  $J$  = 8.3 Hz, 2 H, Ar<sup>Ts</sup>), 6.07 (d,  $J$  = 2.9, Hz, 1 H), 5.91 (d,  $J$  = 9.1, Hz, 0.5

H), 5.79-5.76 (m, 1 H), 5.73-5.79 (m, 1 H), 5.54-5.47 (m, 1 H), 5.28-5.17 (m, 1 H), 5.05-5.01

(m, 0.5 H), 4.50-4.45 (m, 0.5 H), 4.32-4.31 (m, 0.5 H), 4.26-4.19 (m, 1 H), 4.09-3.98 (m, 3

H), 3.95-3.81 (m, 2 H), 3.65-3.62 (m, 0.6 H), 2.45 (s, 3 H, CH<sub>3</sub><sup>Ts</sup>), 2.14 (s, 3 H, CH<sub>3</sub><sup>Ac</sup>), 2.07

(s, 3 H, CH<sub>3</sub><sup>Ac</sup>), 2.03 (s, 3 H, CH<sub>3</sub><sup>Ac</sup>), 1.45 (s, 3 H, CH<sub>3</sub>), 1.37 (s, 3 H, CH<sub>3</sub>), 1.24 (s, 6 H,

CH<sub>3</sub>); <sup>13</sup>C NMR (100 MHz, CDCl<sub>3</sub>):  $\delta$  170.7, 169.9 (C=O<sup>Ac</sup>), 169.5, 169.4 (C=O<sup>Ac</sup>), 169.3,

169.1 (C=O<sup>Ac</sup>), 149.6 (C=O), 144.9, 144.8, 136.8, 136.3, 129.6, 129.5, 128.3, 127.9, 112.4,

112.2 (Cq, C(Me)<sub>2</sub>), 110.6, 109.3 (Cq, C(Me)<sub>2</sub>), 105.0, 104.9 (C-1'), 91.0, 82.7, 82.4, 81.6,

79.9, 79.6, 79.2, 78.9, 73.6, 71.7, 71.5, 69.6, 68.7, 67.5, 67.4, 66.1, 63.7, 62.6, 26.8, 26.7

(CH<sub>3</sub>), 26.6, 26.5 (CH<sub>3</sub>), 26.1, 26.0 (CH<sub>3</sub>), 25.0, 24.9 (CH<sub>3</sub>), 21.6, 21.5 (CH<sub>3</sub><sup>Ts</sup>), 20.8 (CH<sub>3</sub><sup>Ac</sup>),

20.6 (CH<sub>3</sub><sup>Ac</sup>), 20.5 (CH<sub>3</sub><sup>Ac</sup>); HRMS (ESI-TOF)  $m/z$  Calcd for C<sub>31</sub>H<sub>45</sub>N<sub>2</sub>O<sub>16</sub>S<sup>+</sup> [M+ NH<sub>4</sub>]<sup>+</sup>:

733.2484, found: 733.2485.

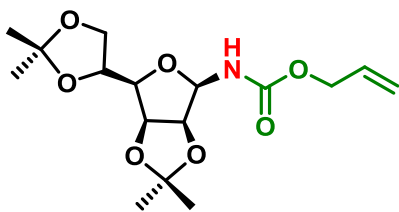

**2,3;5,6-Di-O-isopropylidene- $\beta$ -D-mannofuranosyl allyl carbamate (4).**

A comp **3g** (180 mg, 0.222mmol) and  $K_2CO_3$  (63 mg, 0.457 mmol) , dissolved in minimum quantity of DMF (5 ml) was taken in a round bottom flask and stirred at rt . PhSH (0.03 mL, 0.28 mmol) was added slowly to a reaction mixture and allowed to stirred for 5-6 h.  $Et_2O$  (10 mL) was added in the reaction mixture and was extracted with 1M aq. HCl (2 x 5 mL), washed with brine (10 mL) and dried over  $Na_2SO_4$ . The crude product was concentrated and purified by flash column chromatography (1:5 to 1:2 EtOAc/hexane) to yield the desired product **4** (119 mg, 66 %), as a clear syrup.  $^1H$  NMR (400 MHz,  $CDCl_3$ ):  $\delta$  5.96-5.86 (m, 1 H, =CH), 5.53 (brs, 1 H, NH), 5.34-5.22 (m, 3 H, H-1, =CH<sub>2</sub>), 4.89 (brs, 2 H, H-2, H-3), 4.58-4.56 (m, 2 H, CH<sub>2</sub> Allyl), 4.39-4.35 (m, 1 H, H-5), 4.09-4.01 (m, 3 H, H-4, H-6), 1.49 (s, 3 H, CH<sub>3</sub>), 1.45 (s, 3 H, CH<sub>3</sub>), 1.37 (s, 3 H, CH<sub>3</sub>), 1.34 (s, 3 H, CH<sub>3</sub>);  $^{13}C$  NMR (100 MHz,  $CDCl_3$ ):  $\delta$  155.4 (C=O), 132.2 (=CH), 118.2 (=CH<sub>2</sub>), 112.9 (Cq, C(Me)<sub>2</sub>), 109.1 (Cq, C(Me)<sub>2</sub>), 88.1 (C-1), 85.3 (C-2), 81.2 (C-4), 80.5 (C-3), 73.4 (C-5), 66.7 (C-6), 66.0 (CH<sub>2</sub> Allyl), 26.9 (CH<sub>3</sub>), 25.9 (CH<sub>3</sub>), 25.1 (CH<sub>3</sub>), 24.6 (CH<sub>3</sub>); HRMS (ESI-TOF)  $m/z$  Calcd for  $C_{16}H_{25}NO_7^+$  [M+ Na]<sup>+</sup>: 366.1523, found: 366.1522.

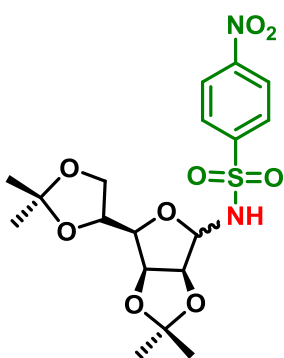

**N-(4-nitrophenyl)sulfonyl 1-amino-1-deoxy-2,3;5,6-Di-O-isopropylidene- $\alpha/\beta$ -D-mannofuranoside (5).**

A stirring solution of **3g** (116 mg, 0.144 mmol) in MeOH/THF (1:2, 9 mL) was treated with sodium *p*-toluenesulfinate (35 mg, 0.187 mmol) and Pd(PPh<sub>3</sub>)<sub>4</sub> (23 mg, 0.021 mmol) followed by degassing the solvent with an argon balloon for 30 minutes. After stirring the reaction for 2 hrs, EtOAc (10 mL) was added and the reaction mixture was extracted with NH<sub>4</sub>Cl (2 x 10 mL), washed with water (10 mL), dried over Na<sub>2</sub>SO<sub>4</sub> and concentrated under vacuum. Flash column chromatography (1:8 to 1:2 EtOAc/Hexane) was performed to separate the desired product **5** (71 mg, 61 %,  $\alpha$ : $\beta$  1:1.5). <sup>1</sup>H NMR (400 MHz, CDCl<sub>3</sub>):  $\delta$  8.37-8.32 (m, 2 H, Ar<sup>Ns</sup>), 8.13-8.08 (m, 2 H, Ar<sup>Ns</sup>), 6.00-5.92 (m, 1 H), 5.39-5.37 (m, 0.7 H), 5.05 (dd, *J* = 3.5, 9.8 Hz, 0.3 H), 4.74-4.66 (m, 3 H), 4.26-4.19 (m, 1 H), 3.88-3.82 (m, 1 H), 3.72-3.70 (m, 1 H), 3.48-3.31 (m, 1 H), 1.45 (s, 3 H, CH<sub>3</sub>), 1.34 (s, 3 H, CH<sub>3</sub>), 1.31 (s, 3 H, CH<sub>3</sub>), 1.29 (s, 3 H, CH<sub>3</sub>); <sup>13</sup>C NMR (100 MHz, CDCl<sub>3</sub>):  $\delta$  150.2, 150.1, 147.0, 146.9, 146.7, 146.5, 128.5, 128.4, 124.3, 124.1, 113.6, 113.5 (C<sub>q</sub>, C(Me)<sub>2</sub>), 109.3, 109.2 (C<sub>q</sub>, C(Me)<sub>2</sub>), 89.4, 89.3, 85.6, 85.5, 83.9, 83.8, 80.5, 79.6, 79.4, 79.2, 79.0, 78.3, 72.6, 72.5, 66.4, 66.0, 26.9, 26.8 (CH<sub>3</sub>), 25.7, 25.6 (CH<sub>3</sub>), 25.1, 24.9 (CH<sub>3</sub>), 24.6, 24.5 (CH<sub>3</sub>); HRMS (ESI-TOF) *m/z* Calcd for C<sub>18</sub>H<sub>24</sub>N<sub>2</sub>NaO<sub>9</sub>S<sup>+</sup> [M+ Na]<sup>+</sup>: 447.1095, found: 447.1090.

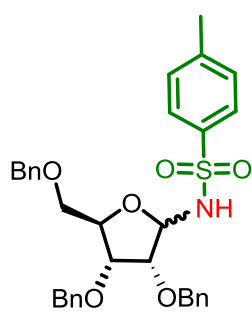

**2,3,5-Tri-O-benzyl- $\alpha$ / $\beta$ -D-ribofuranosyl *p*-toluenesulfonamide (6).**

In a stirred solution of **3v** (50 mg, 0.07 mmol) in dry MeOH (10 ml), K<sub>2</sub>CO<sub>3</sub> (46 mg, 0.33 mmol) was added to a solution. The resulting mixture was stirred under reflux for 3 h. After this time, the crude product was evaporated *in vacuo*. The residue was purified by flash column chromatography to yield two anomers ( $\alpha$ / $\beta$  1:1.8) of the desired product **6** (23 mg 55%). <sup>1</sup>H NMR (400 MHz, CDCl<sub>3</sub>):  $\delta$  7.79-7.61 (m, 2 H, Ar), 7.38-7.28 (m, 11 H, Ar), 7.24-



7.14 (m, 6 H), 6.23 (d,  $J = 9.0$  Hz, 0.4 H), 5.51-5.27 (m, 1 H), 4.86-4.61 (m, 2 H), 4.58-4.51 (m, 2 H), 4.48-4.45 (m, 1 H), 4.42-4.31 (m, 2 H), 4.15-3.91 (m, 2 H), 3.43-3.30 (m, 2 H), 2.37 (s, 3 H,  $\text{CH}_3^{\text{Ts}}$ );  $^{13}\text{C}$  NMR (100 MHz,  $\text{CDCl}_3$ ):  $\delta$  143.3, 142.9, 140.9, 139.3, 138.1, 137.8, 137.6, 137.3, 137.2, 129.5, 129.3, 128.7, 128.6, 128.5, 18.4, 128.2, 128.1, 128.0, 127.9, 127.8, 127.7, 127.6, 127.5, 127.4, 127.1, 126.9, 83.2, 81.5, 81.1, 78.6, 77.7, 76.9, 74.9, 74.2, 73.4, 73.2, 72.8, 72.3, 71.2, 70.6, 69.9, 65.4, 21.6, 21.5 ( $\text{CH}_3^{\text{Ts}}$ ); HRMS (ESI-TOF)  $m/z$  Calcd for  $\text{C}_{33}\text{H}_{35}\text{NNaO}_6\text{S}^+$   $[\text{M} + \text{Na}]^+$ : 596.2077, found: 596.2080.

5. Spectral data of **1a**, **1e $\alpha$** , **1e $\alpha\beta$**
6. Spectral data of **2a**, **2b**, **2d**, **2e**, **2f**, **2g**, **2h**, **2i**, **2j**
7. Confirmation the exact structure **3a** by NMR (**NOESY correlation data**) and Spectra Data, HRMS of all the synthesized *N*-glycofuranosides (**3a-3z**, **3v'**, **3aa**)
8. Spectra Data, HRMS of compounds **4**, **5**, **6**

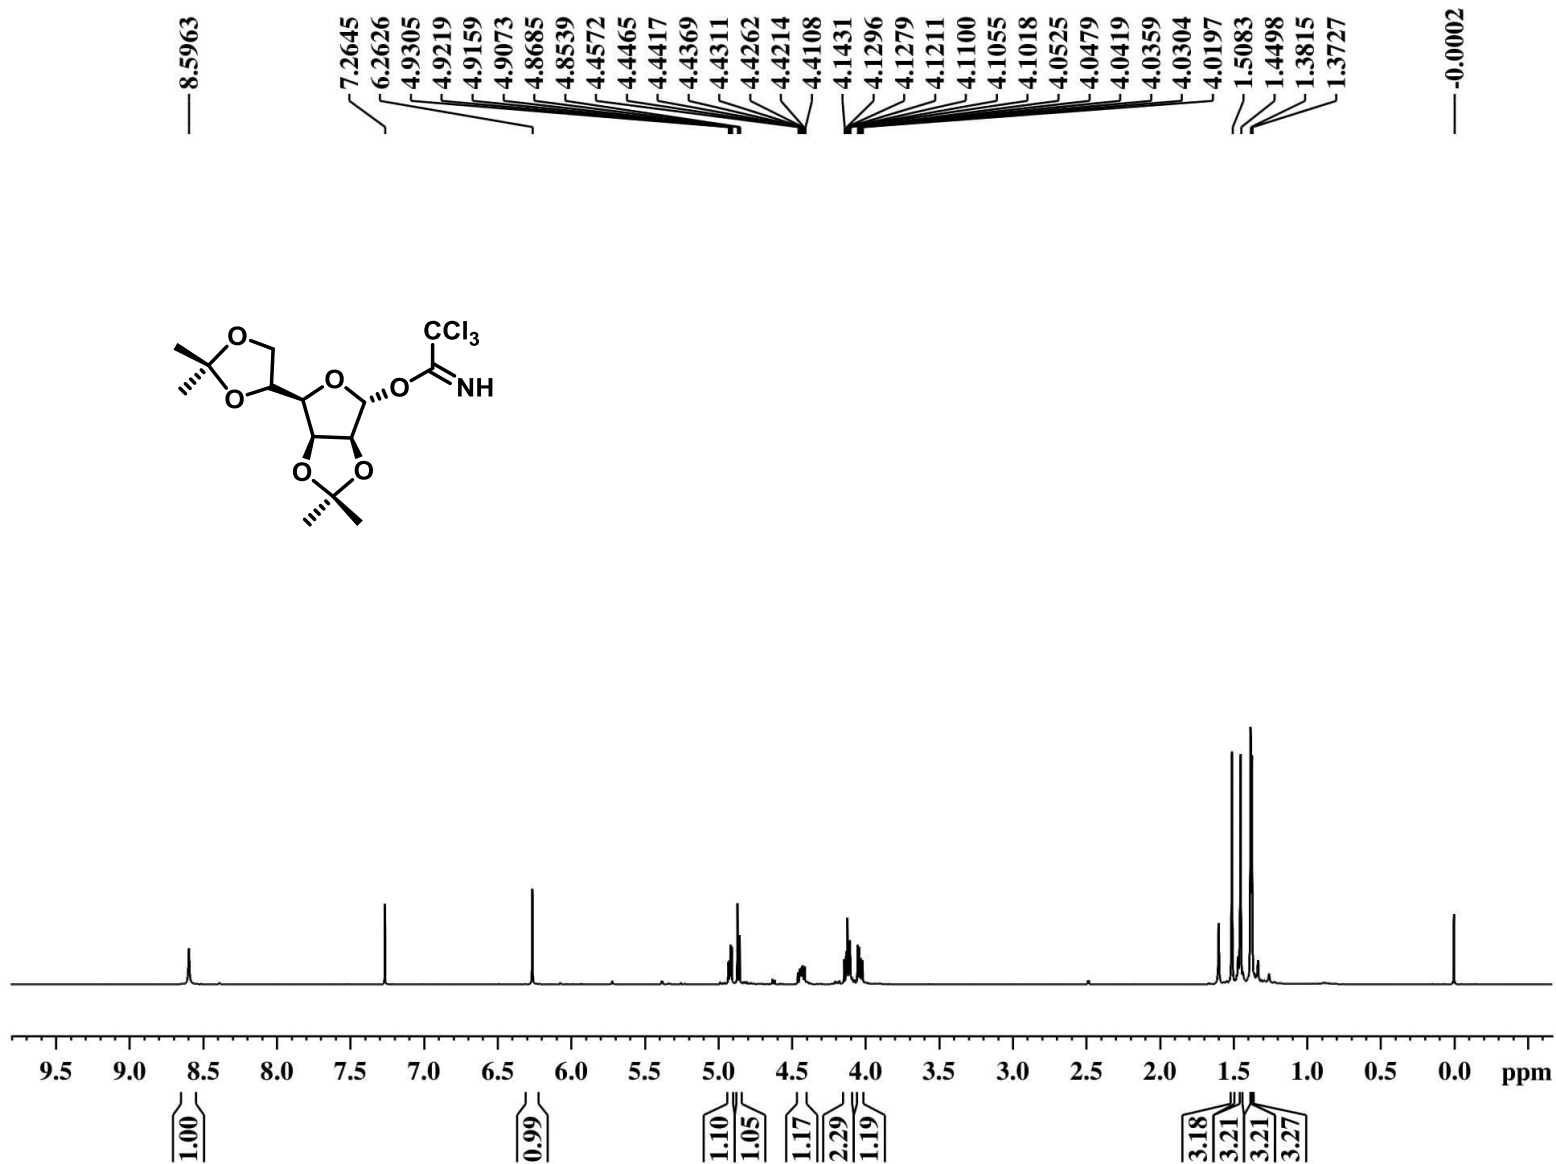

$^1\text{H}$  NMR spectrum of **1a** (400 MHz,  $\text{CDCl}_3$ )

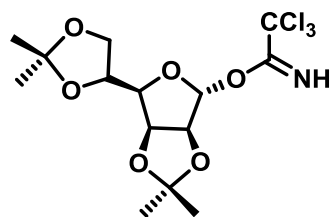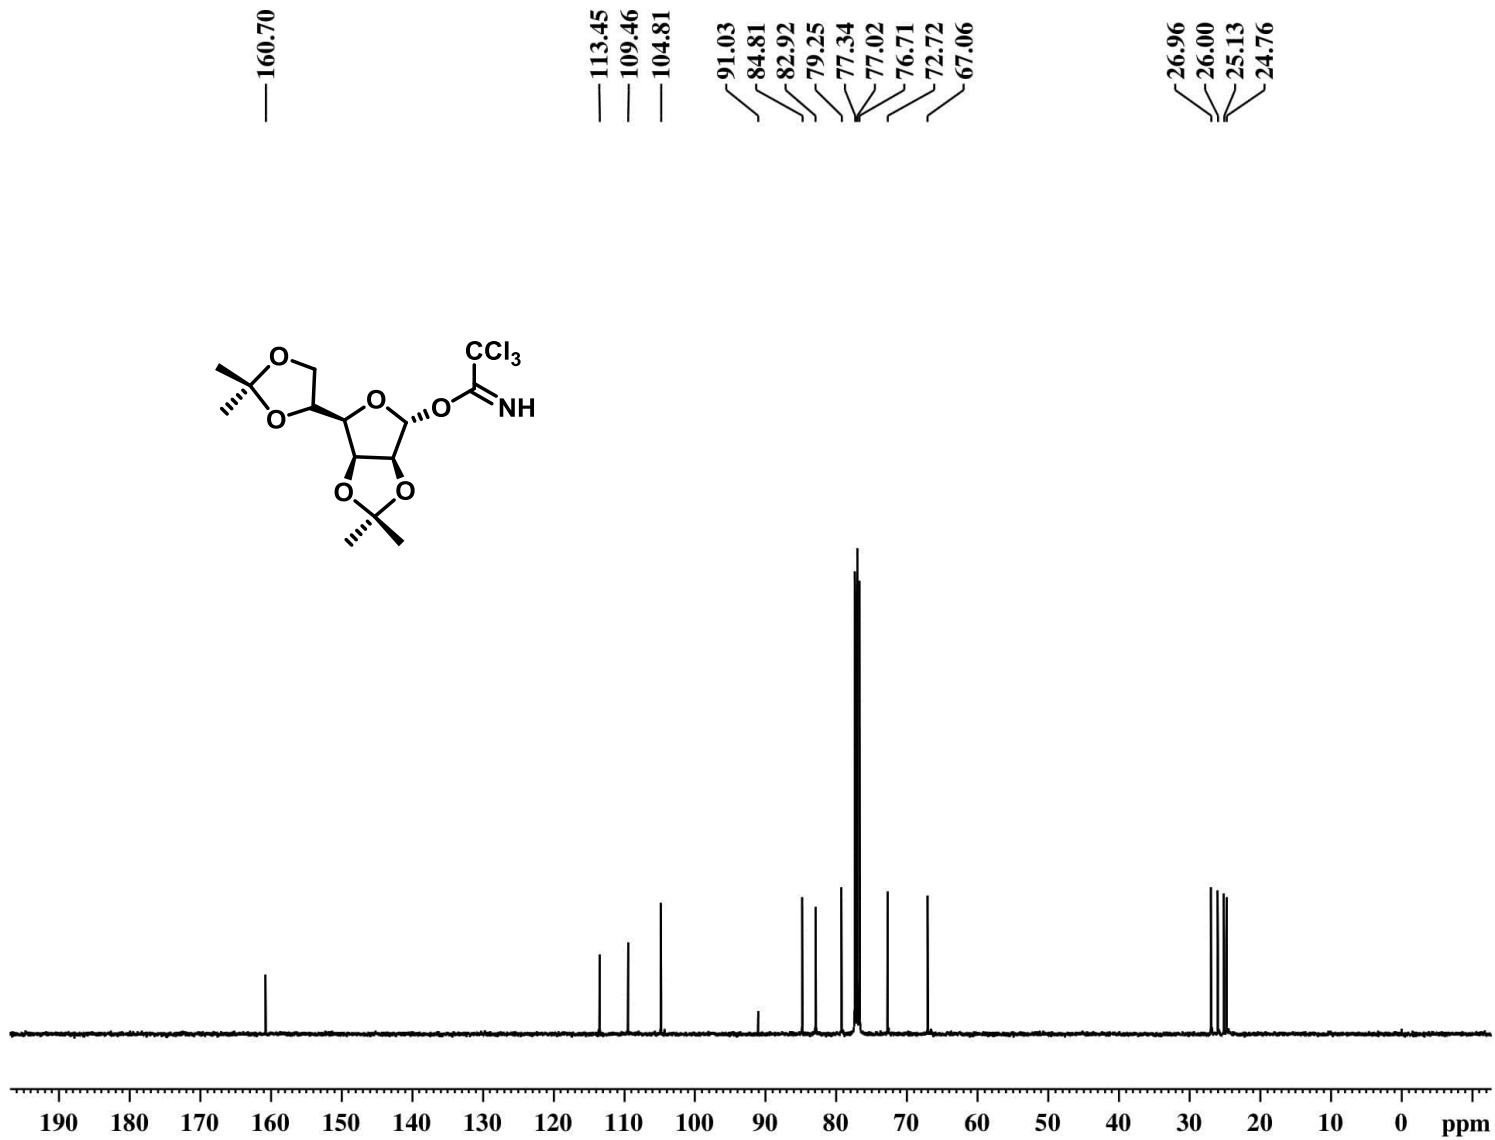

<sup>13</sup>C NMR spectrum of **2a** (100 MHz, MHz, CDCl<sub>3</sub>)

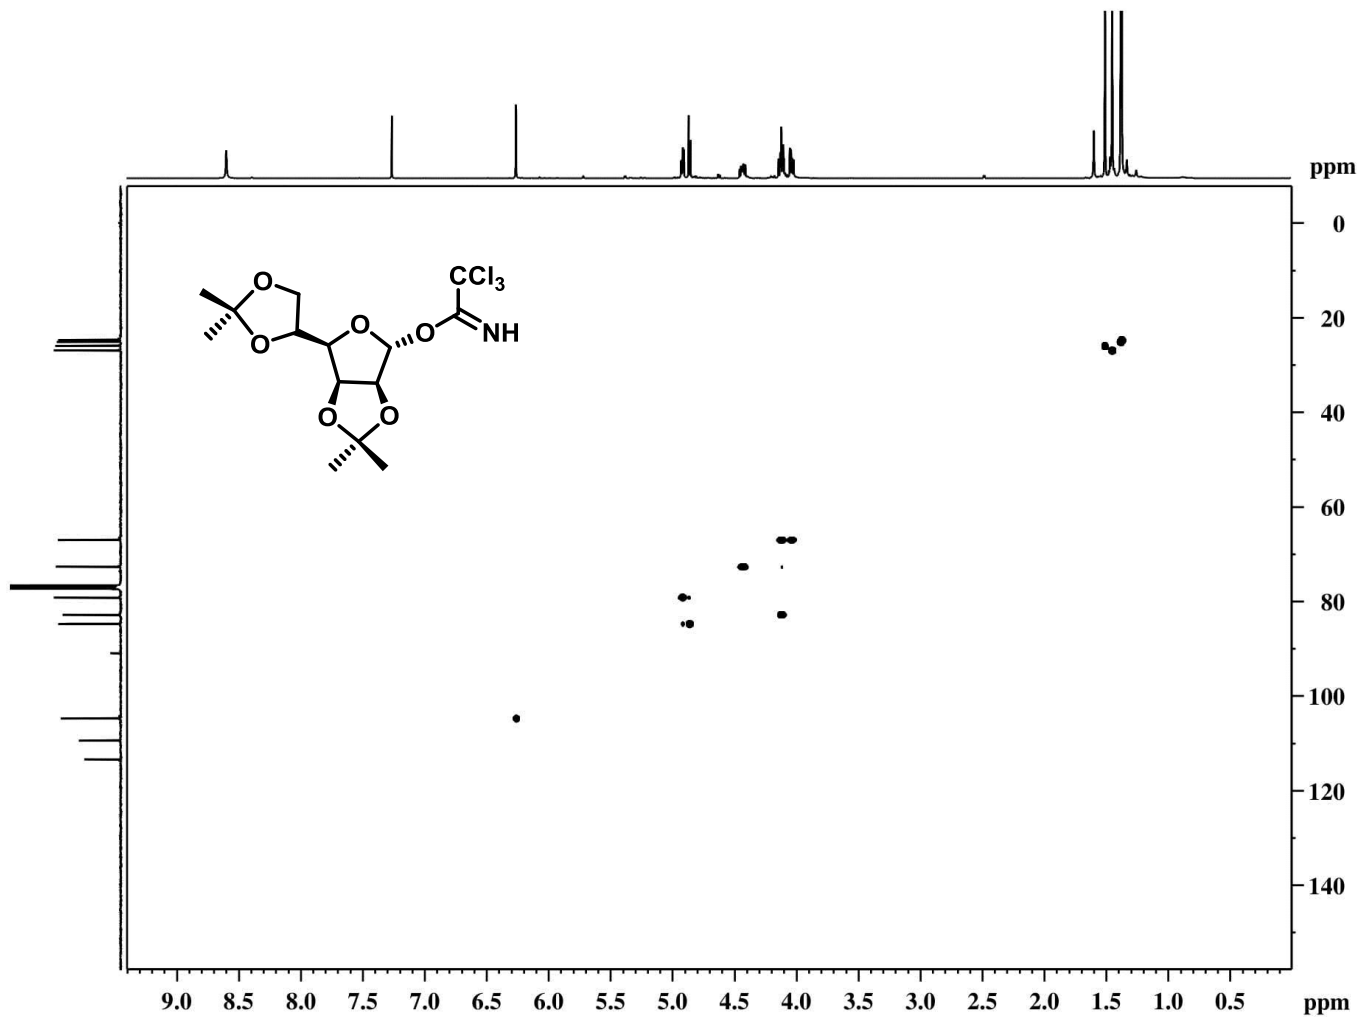

2D HSQC spectrum of **1a** ( $\text{CDCl}_3$ ).

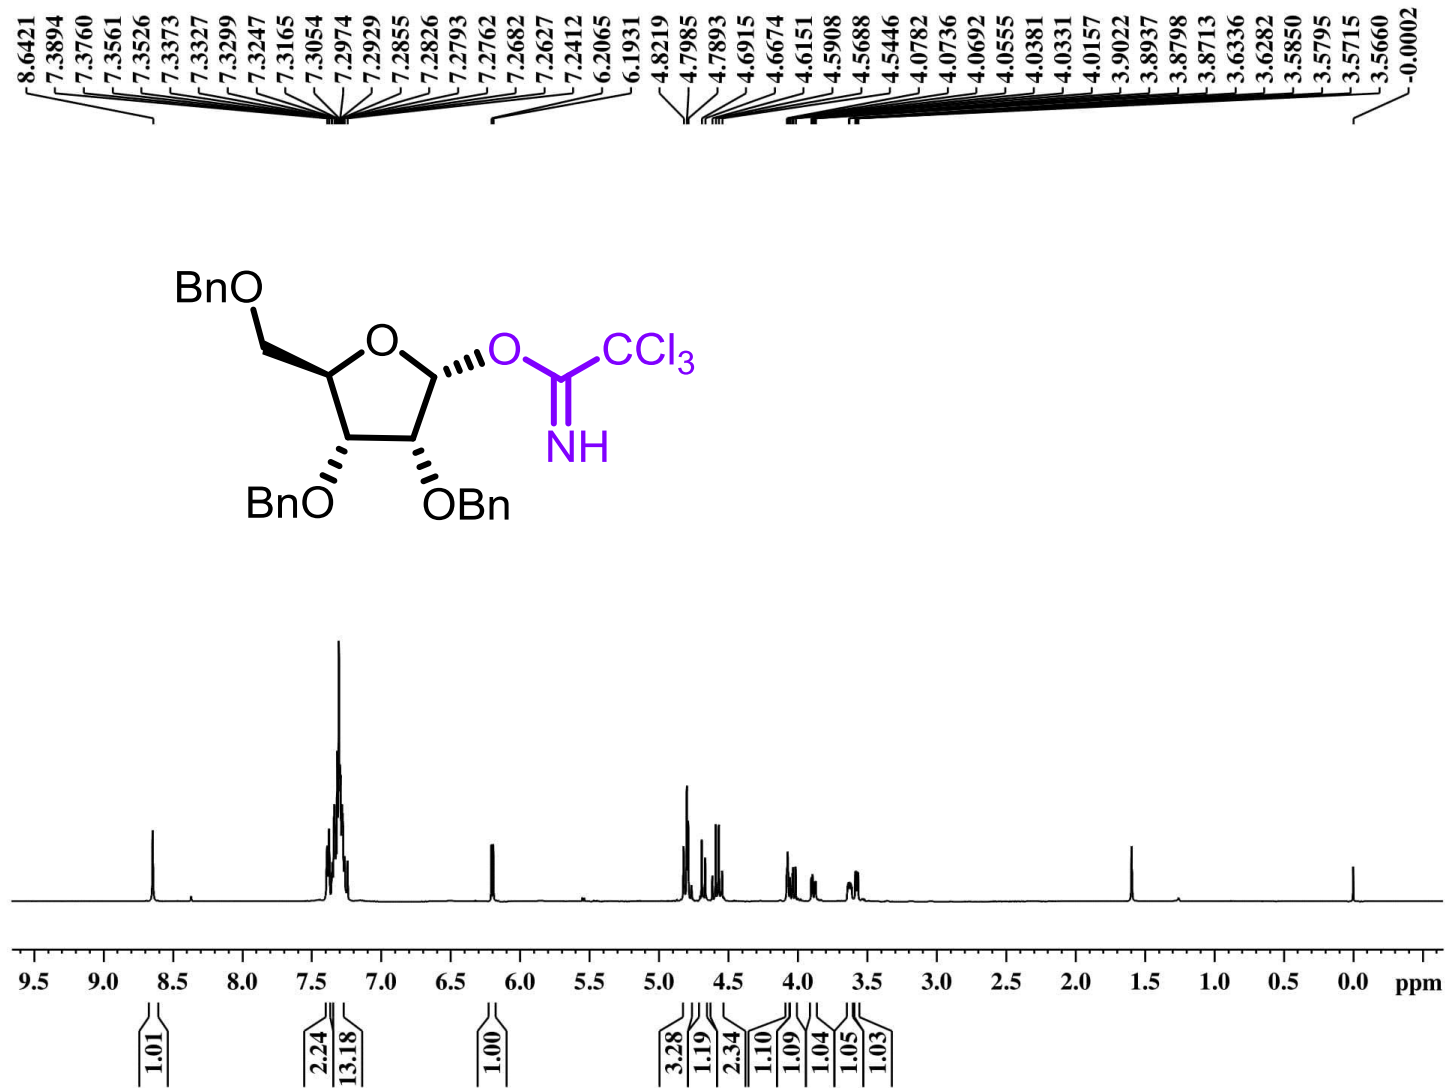

$^1\text{H}$  NMR spectrum of **1eα** (400 MHz,  $\text{CDCl}_3$ )

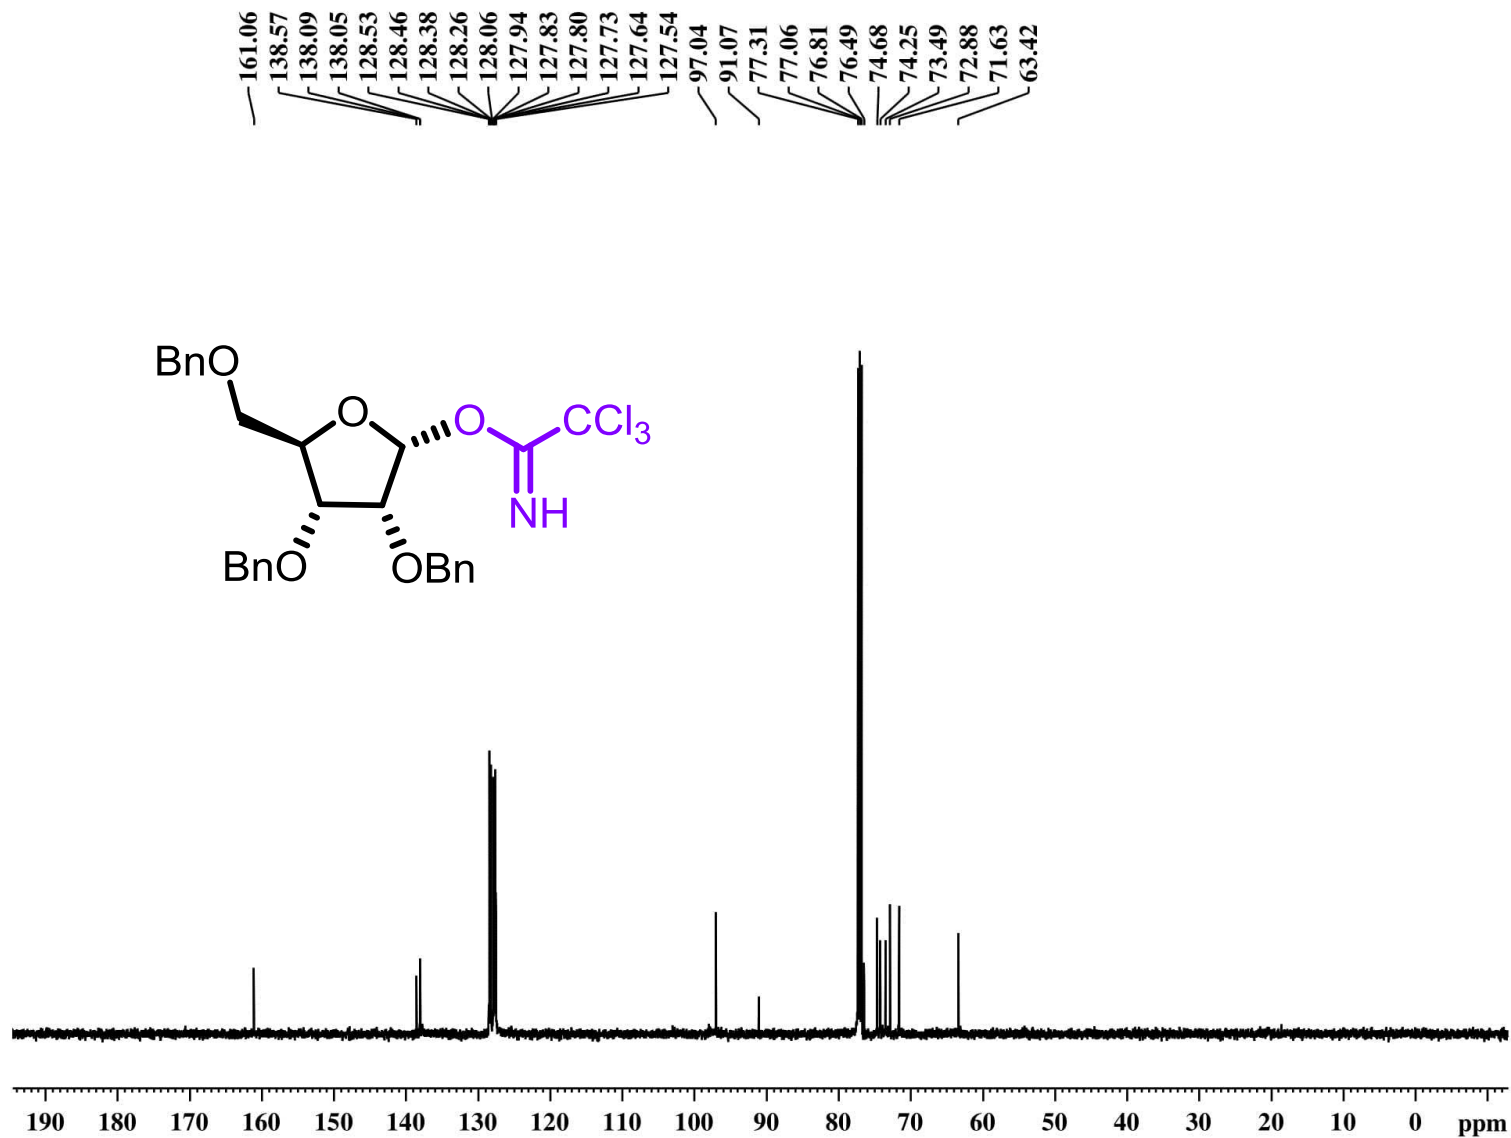

$^{13}\text{C}$  NMR spectrum of **1e $\alpha$**  (100 MHz, MHz,  $\text{CDCl}_3$ )

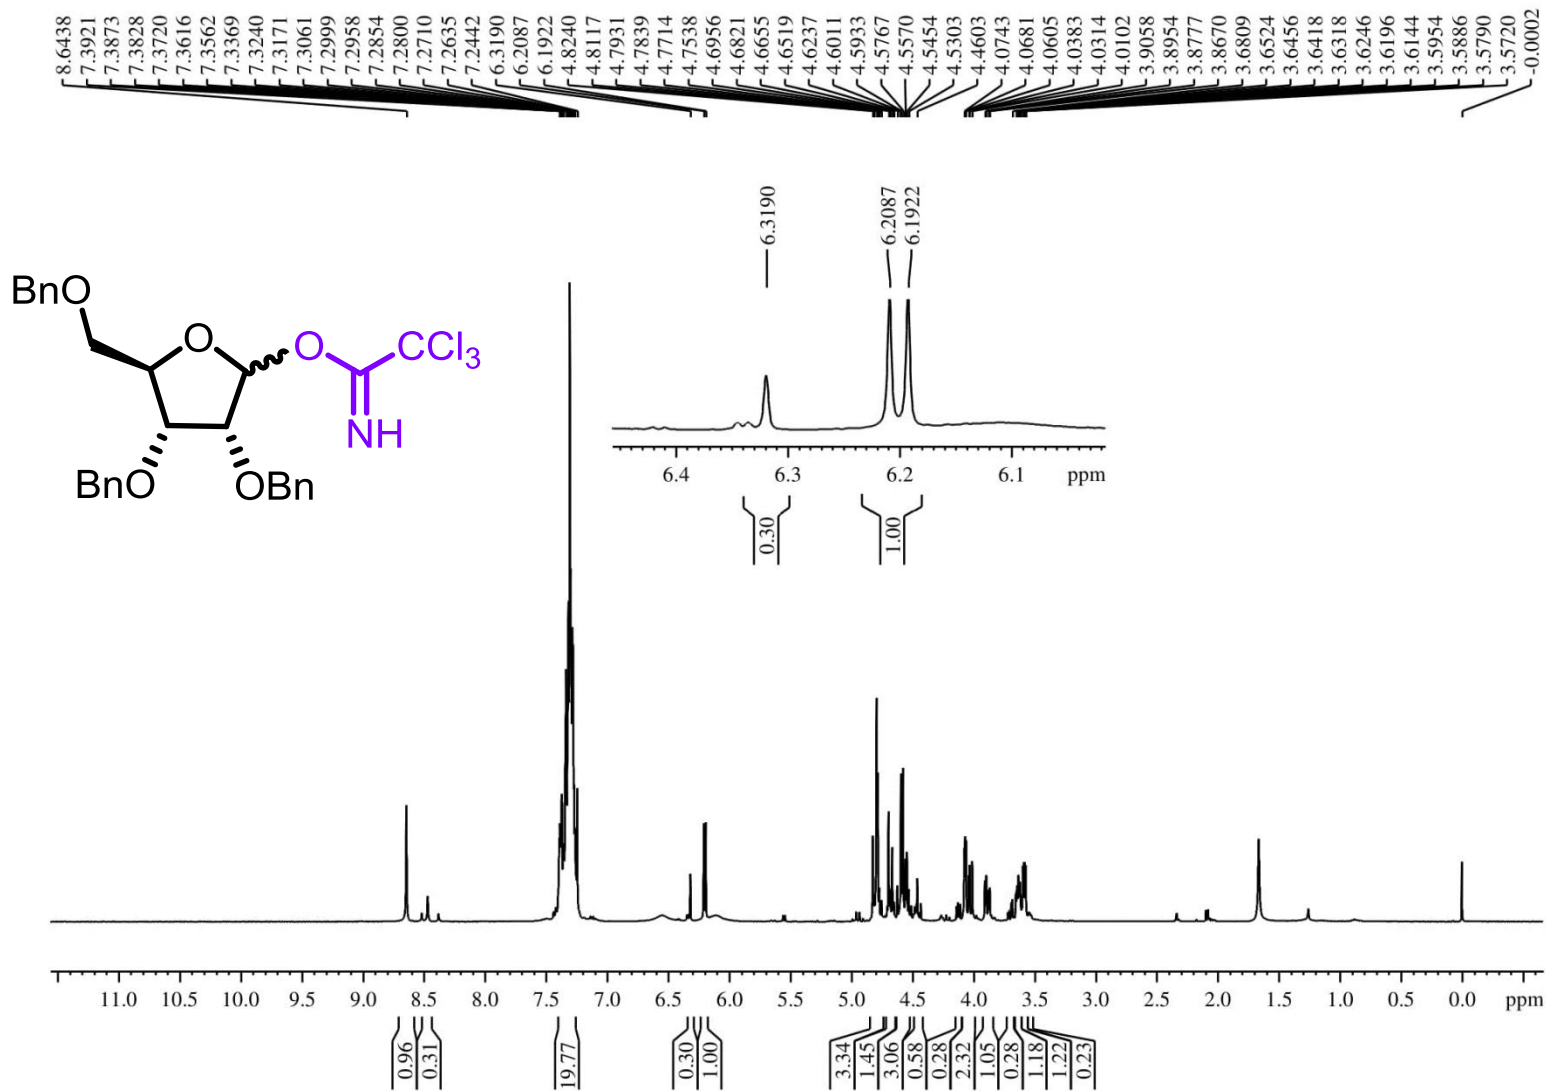

<sup>1</sup>H NMR spectrum of **1 $\alpha$  $\beta$**  (400 MHz, CDCl<sub>3</sub>)



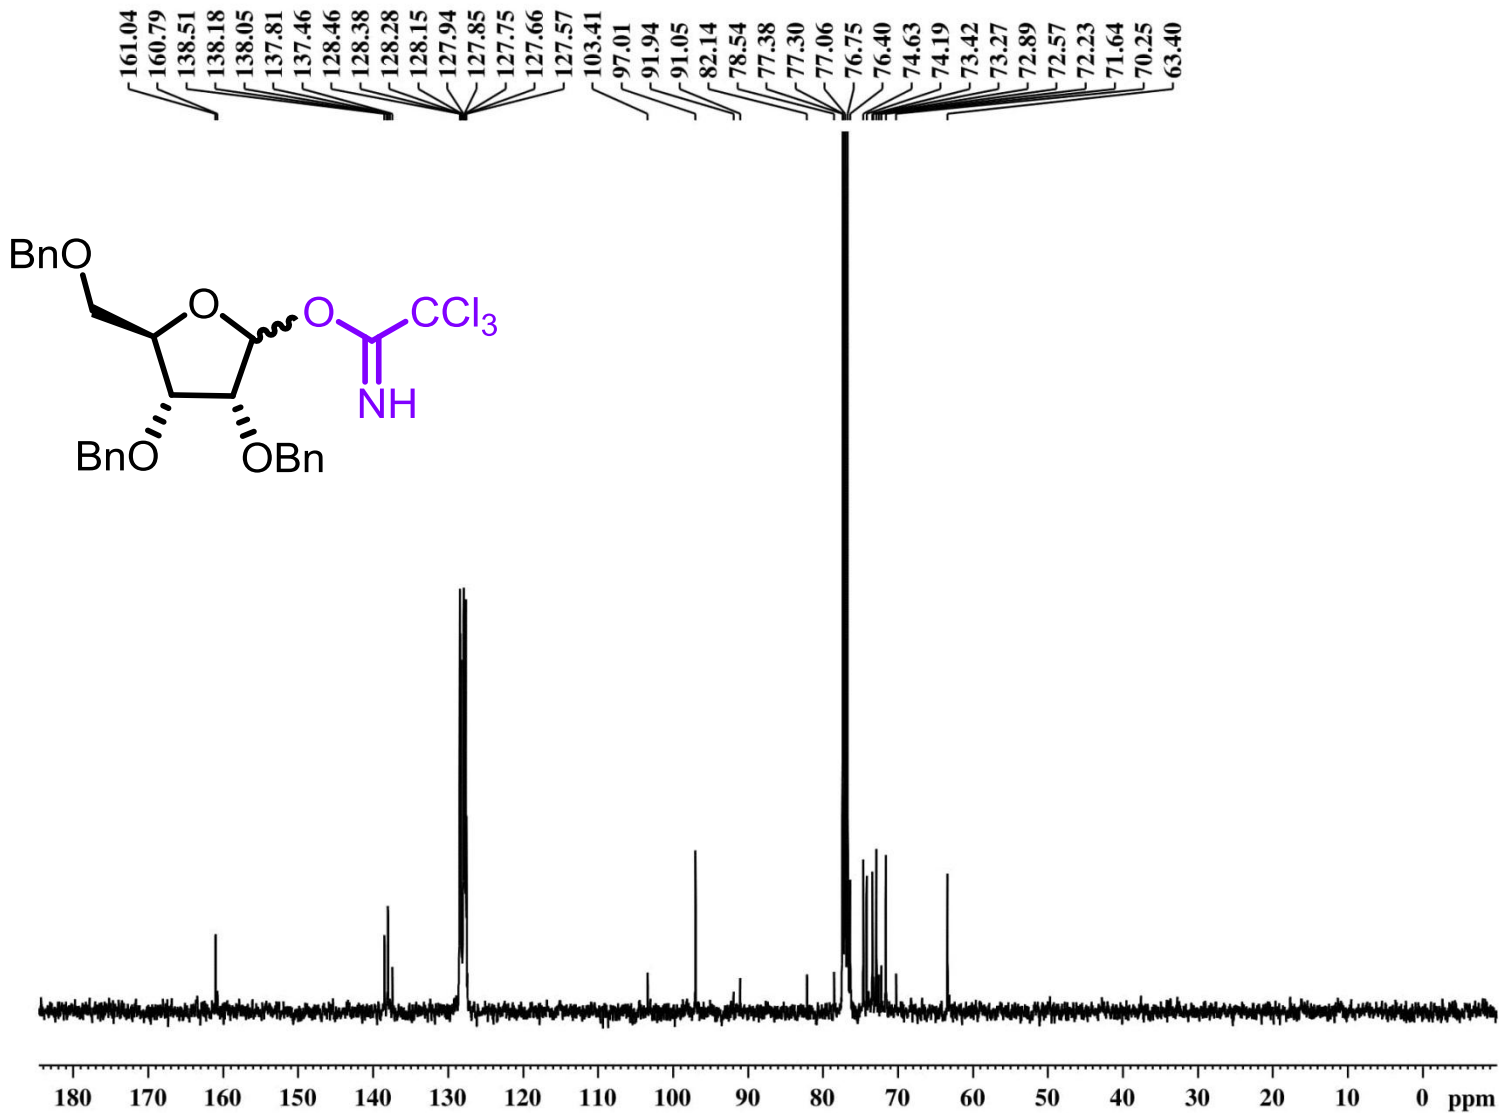

<sup>13</sup>C NMR spectrum of **1eαβ** (100 MHz, MHz, CDCl<sub>3</sub>)

6. Spectral data of **2a, 2b, 2d, 2e, 2f, 2g, 2h, 2i, 2j**

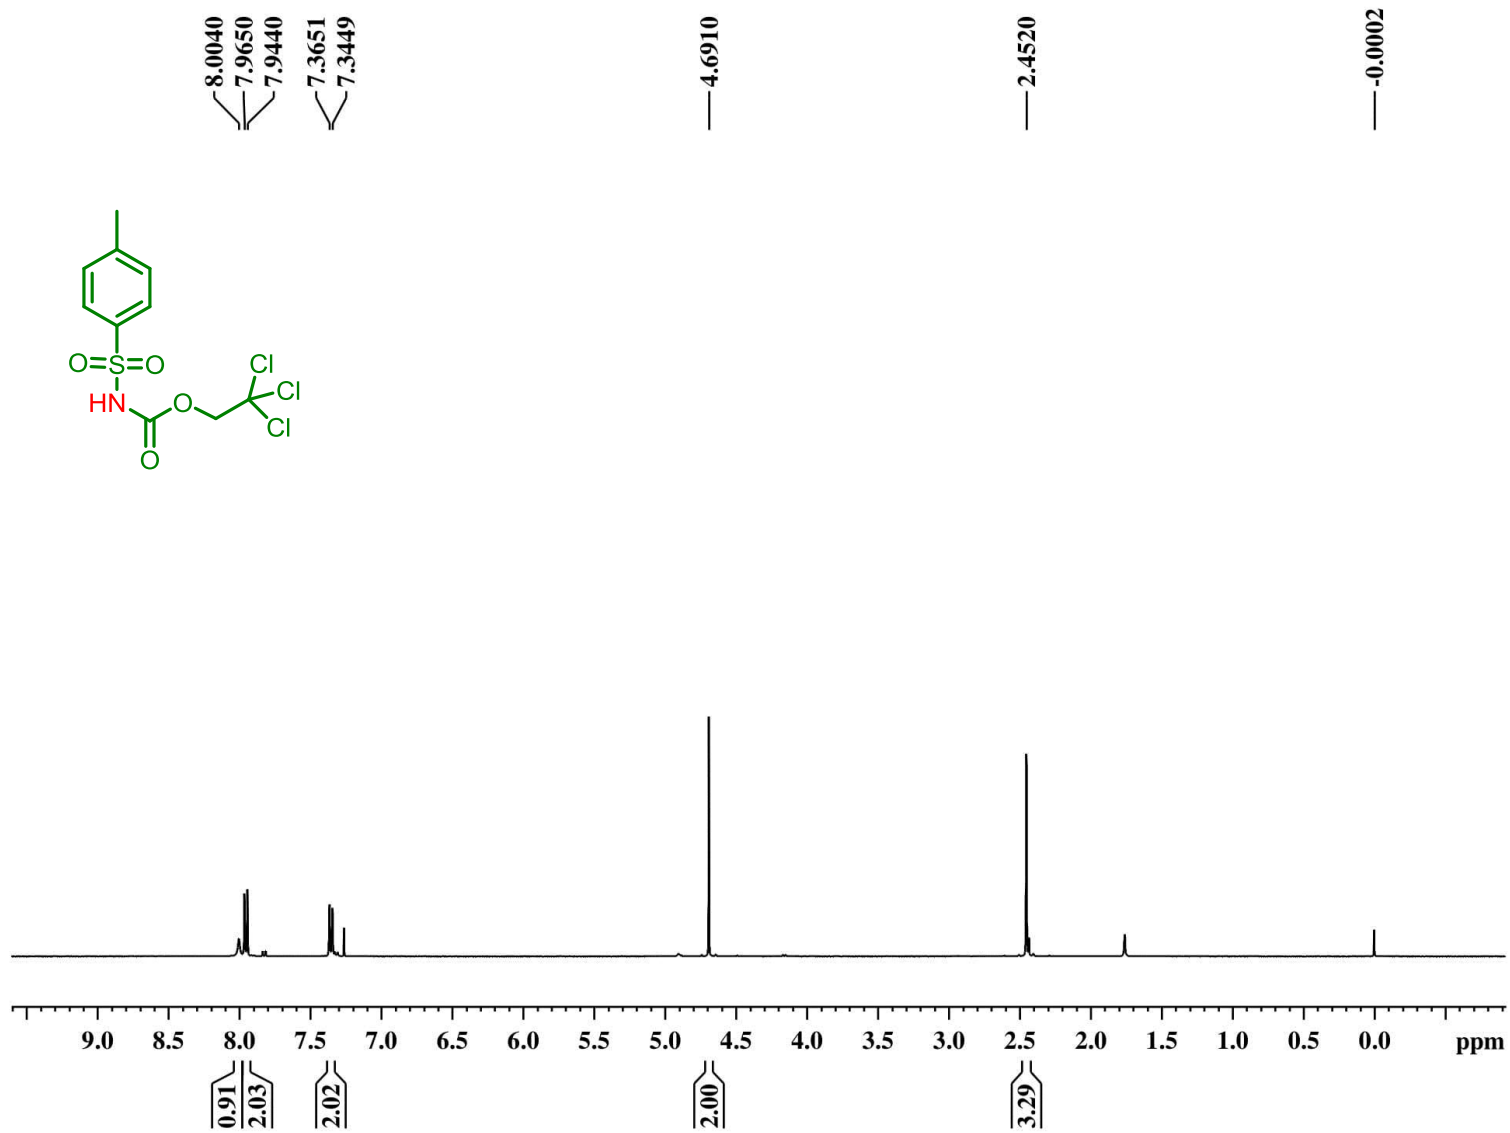

$^1\text{H}$  NMR spectrum of **2a** (400 MHz,  $\text{CDCl}_3$ )

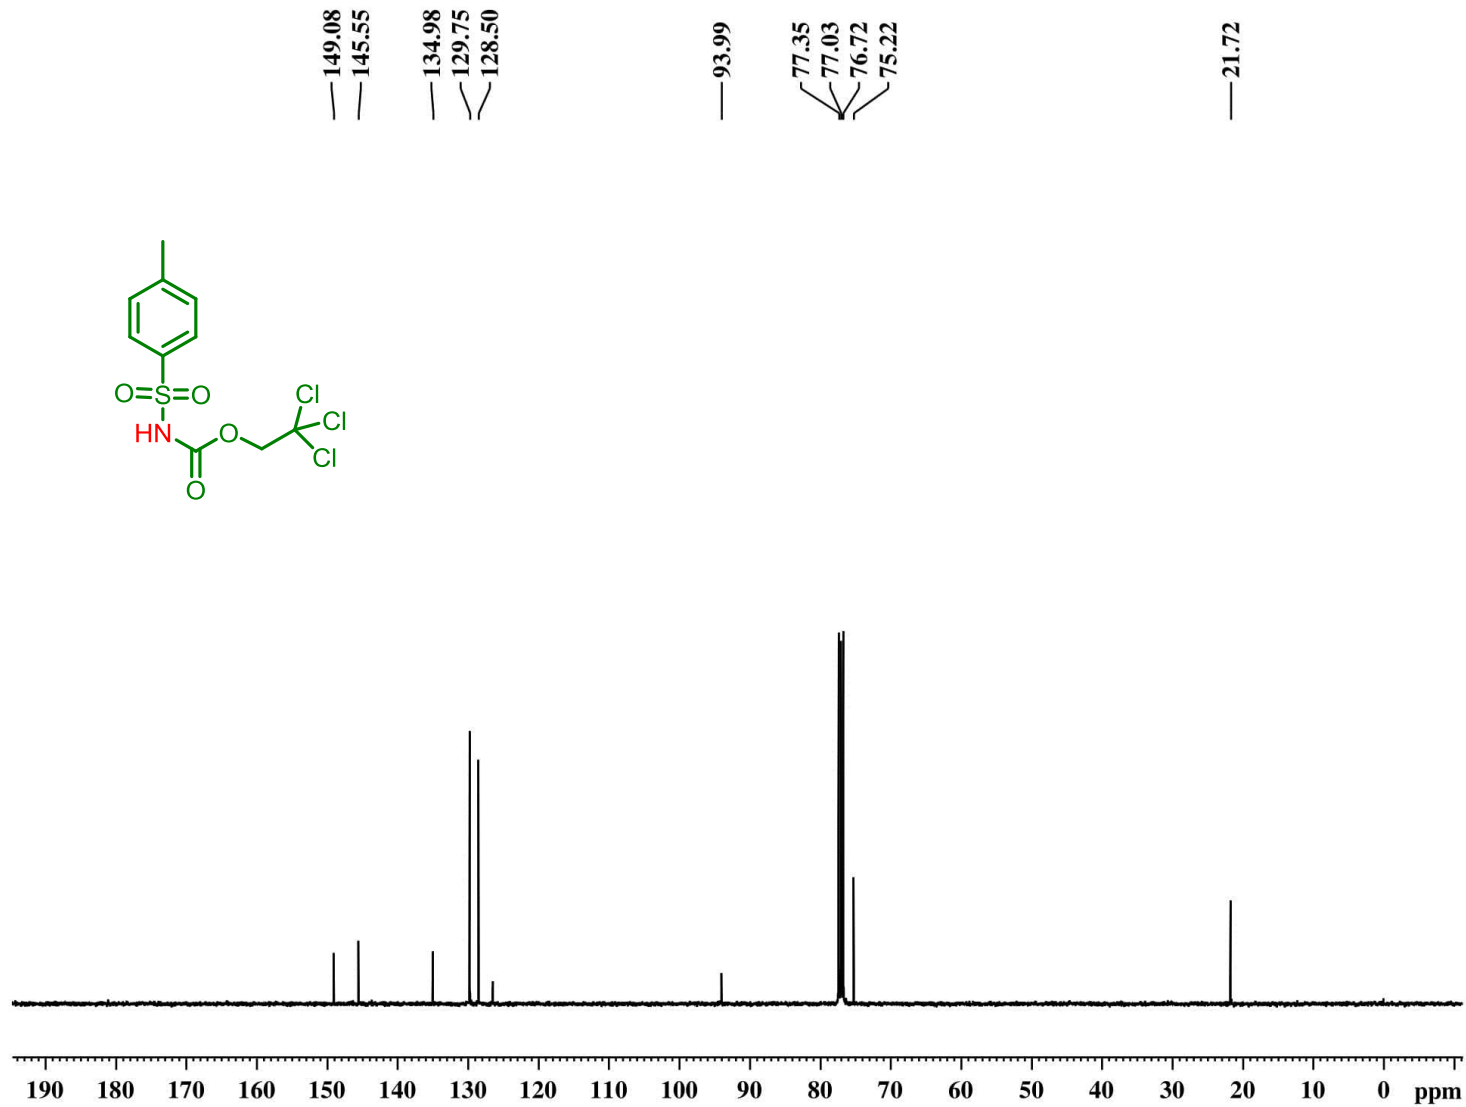

$^{13}\text{C}$  NMR spectrum of **2a** (100 MHz,  $\text{CDCl}_3$ )

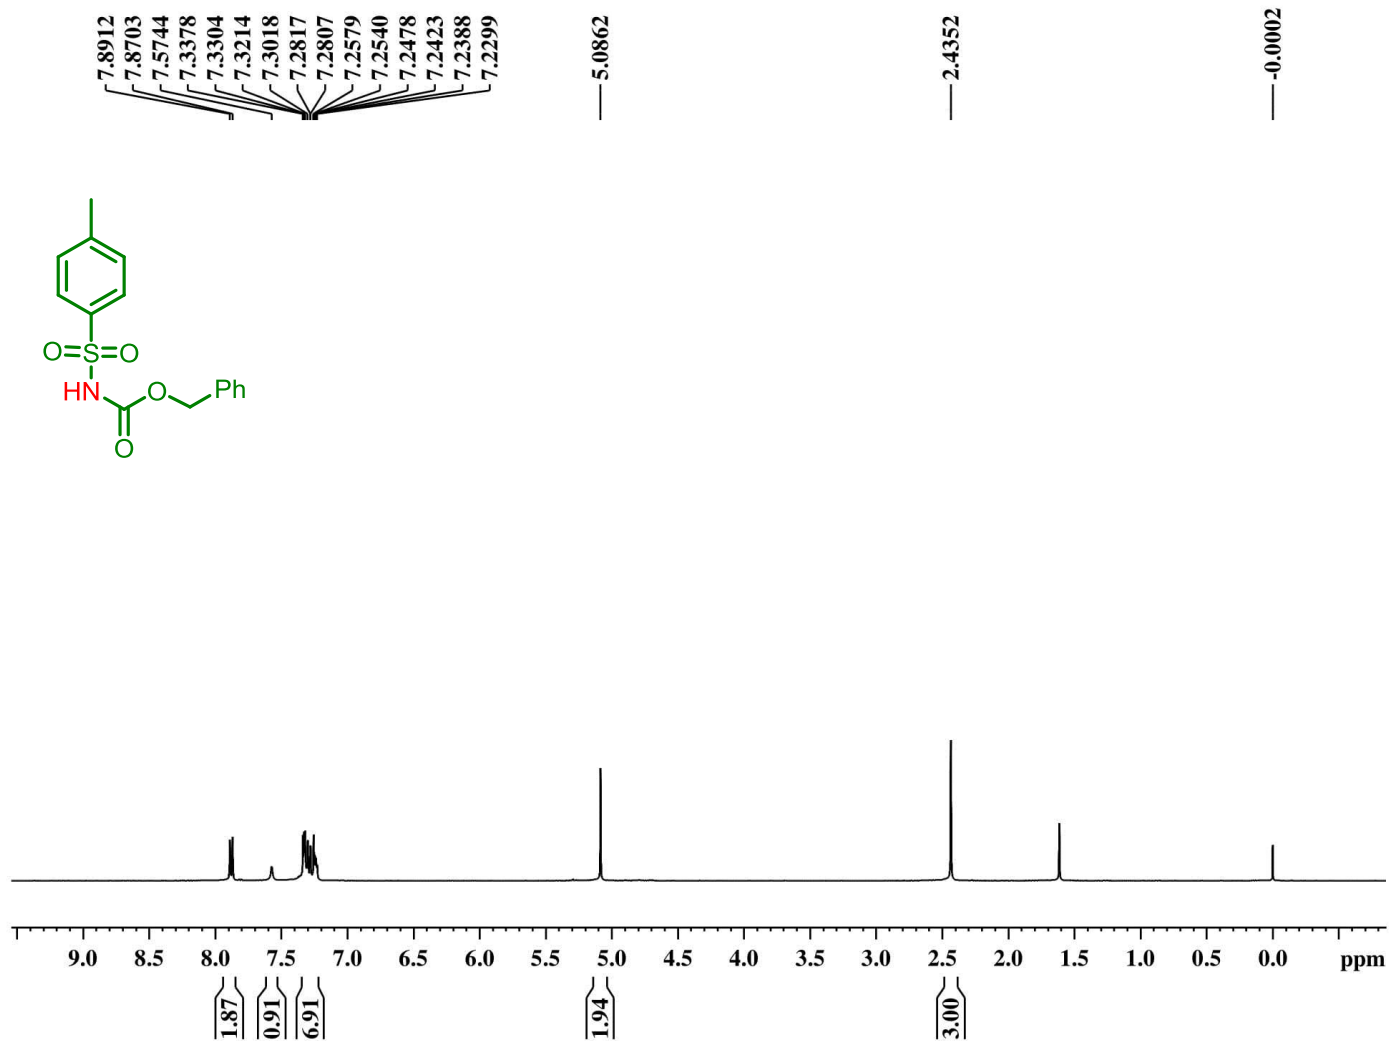

<sup>1</sup>H NMR spectrum of **2b** (400 MHz, CDCl<sub>3</sub>)

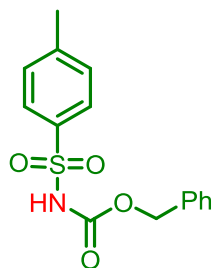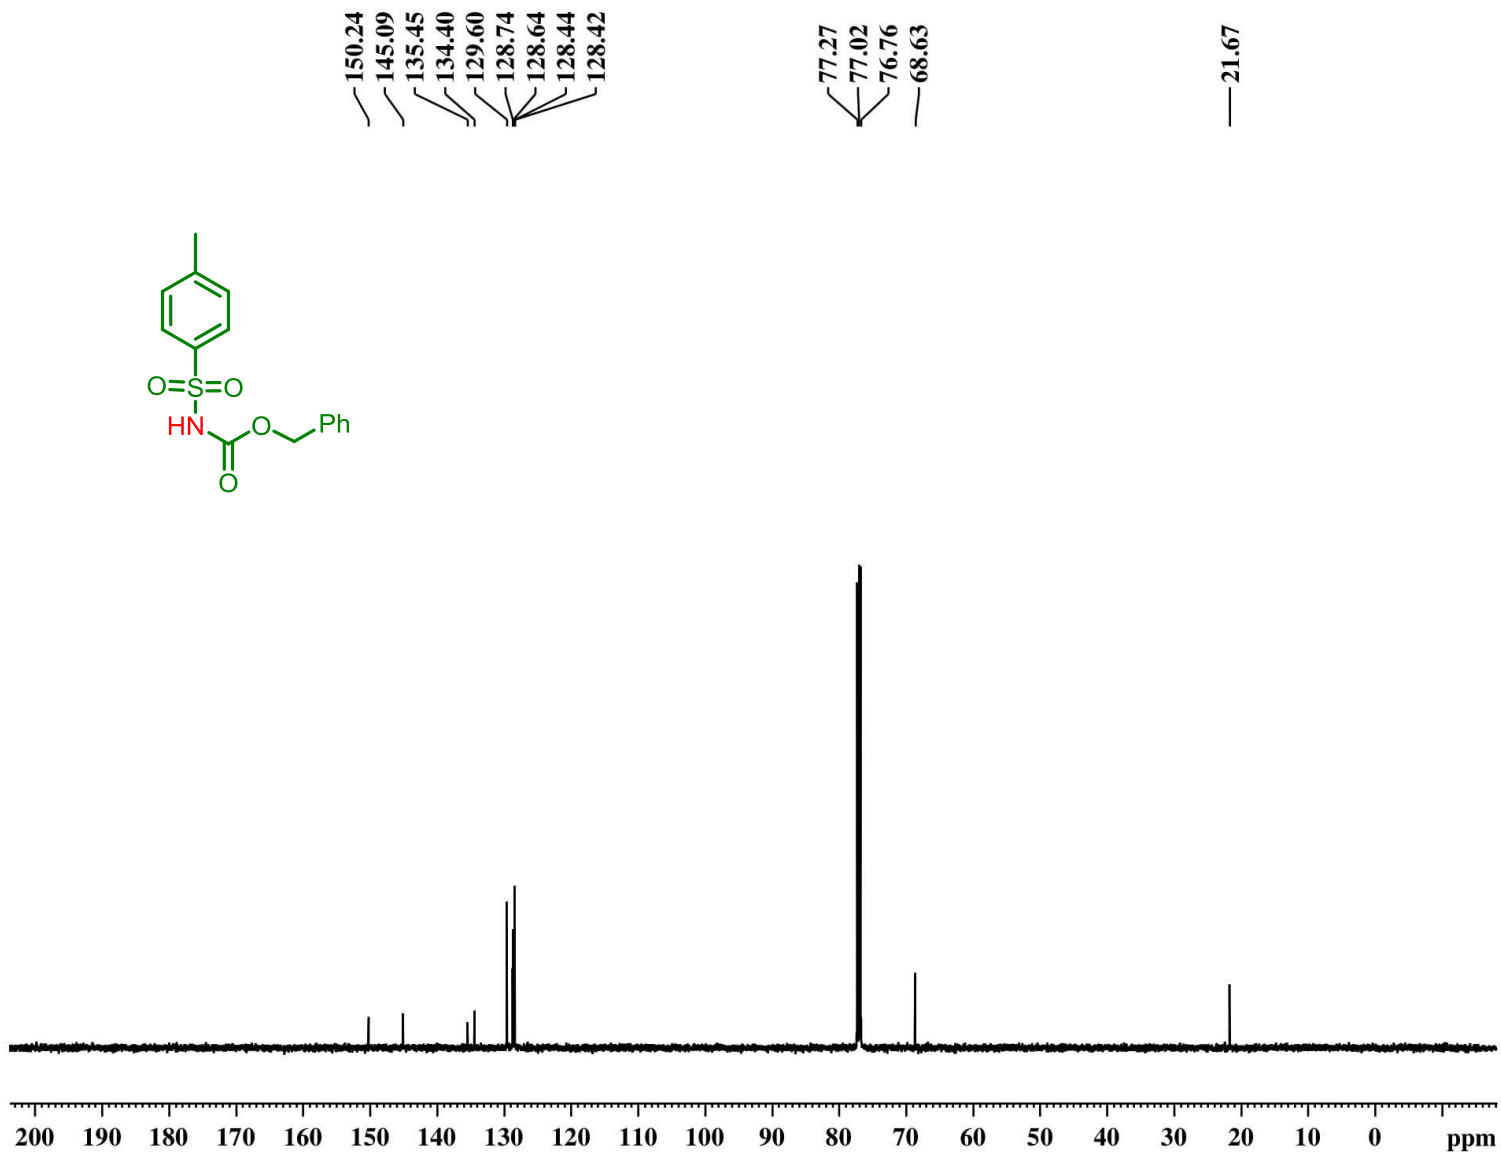

<sup>13</sup>C NMR spectrum of **2b** (100 MHz, MHz, CDCl<sub>3</sub>)

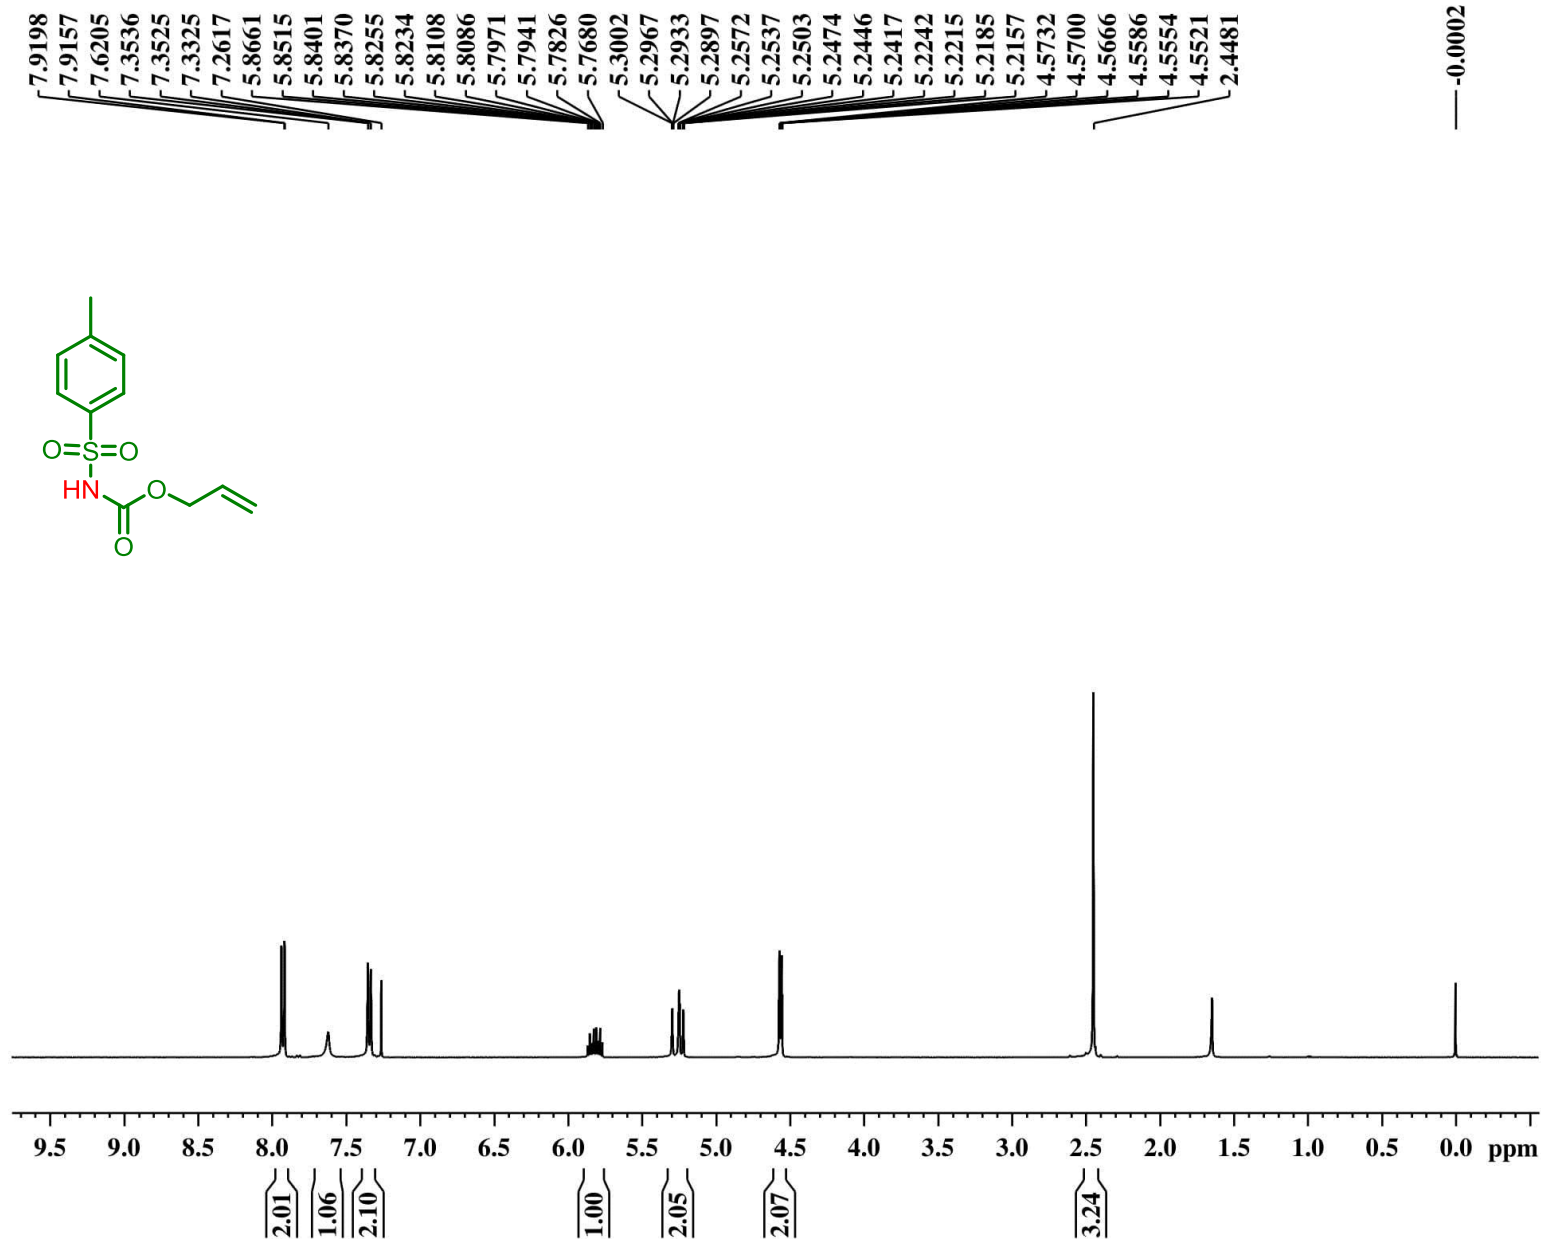

<sup>1</sup>H NMR spectrum of **2d** (400 MHz, CDCl<sub>3</sub>)

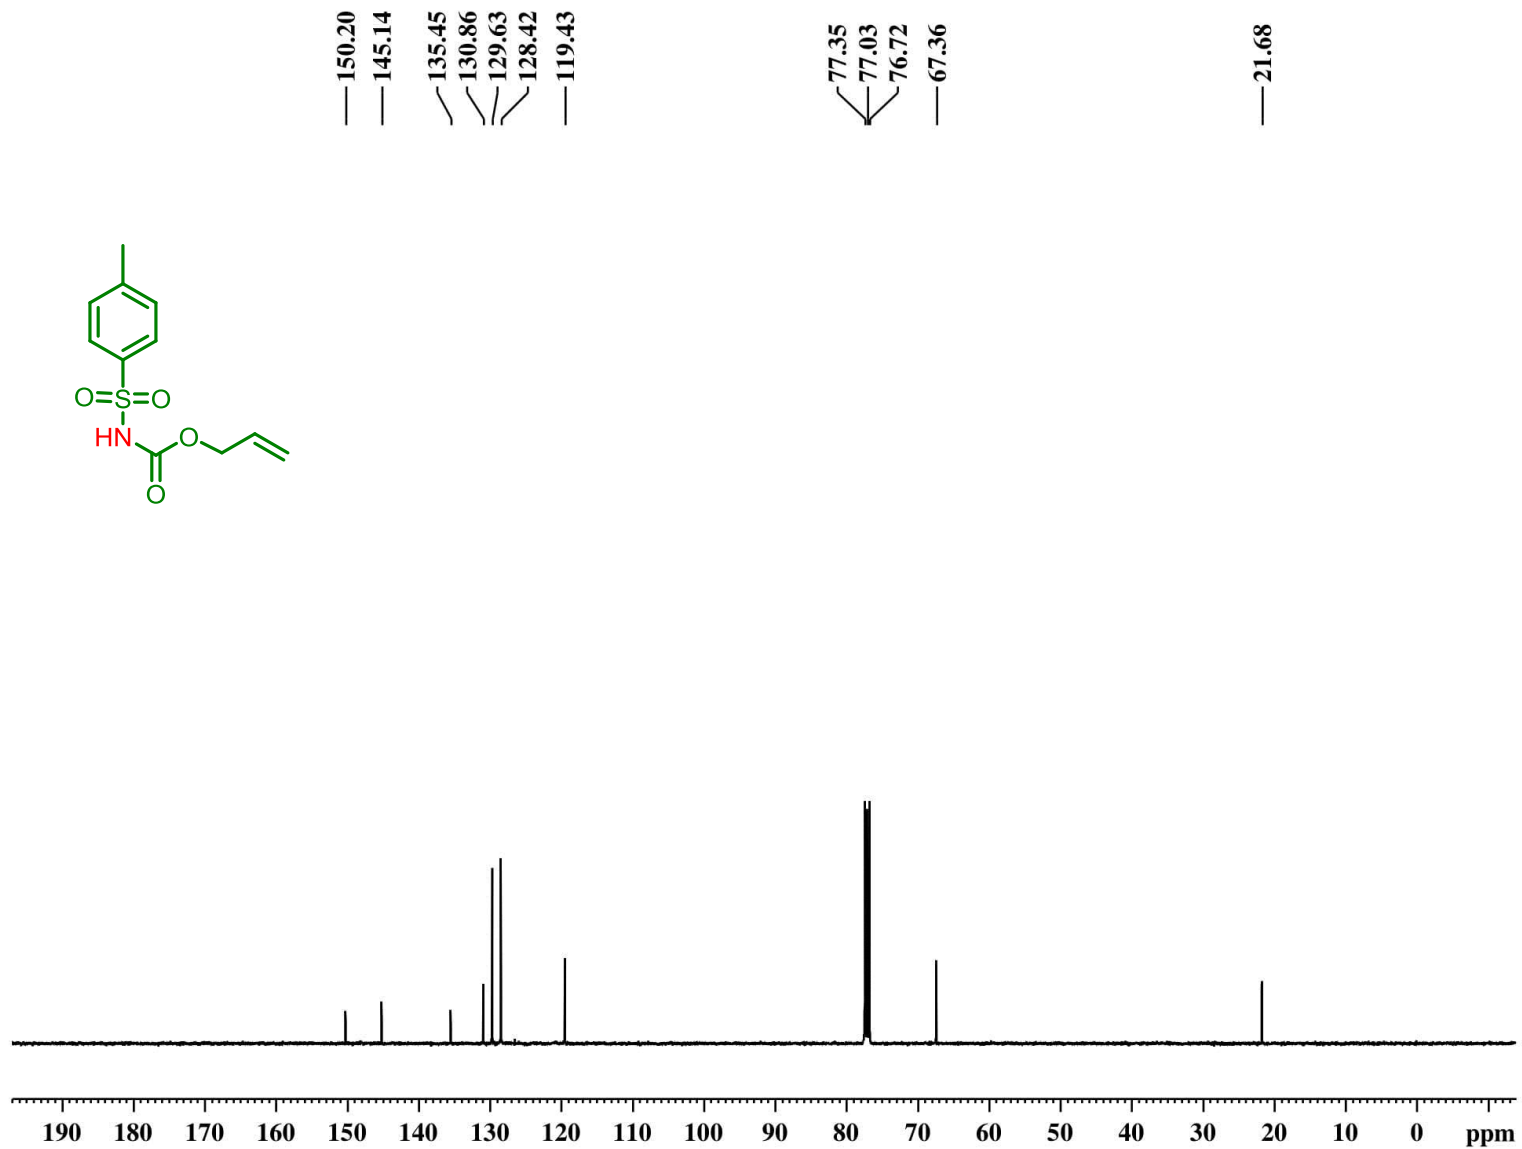

$^{13}\text{C}$  NMR spectrum of **2d** (100 MHz,  $\text{CDCl}_3$ )



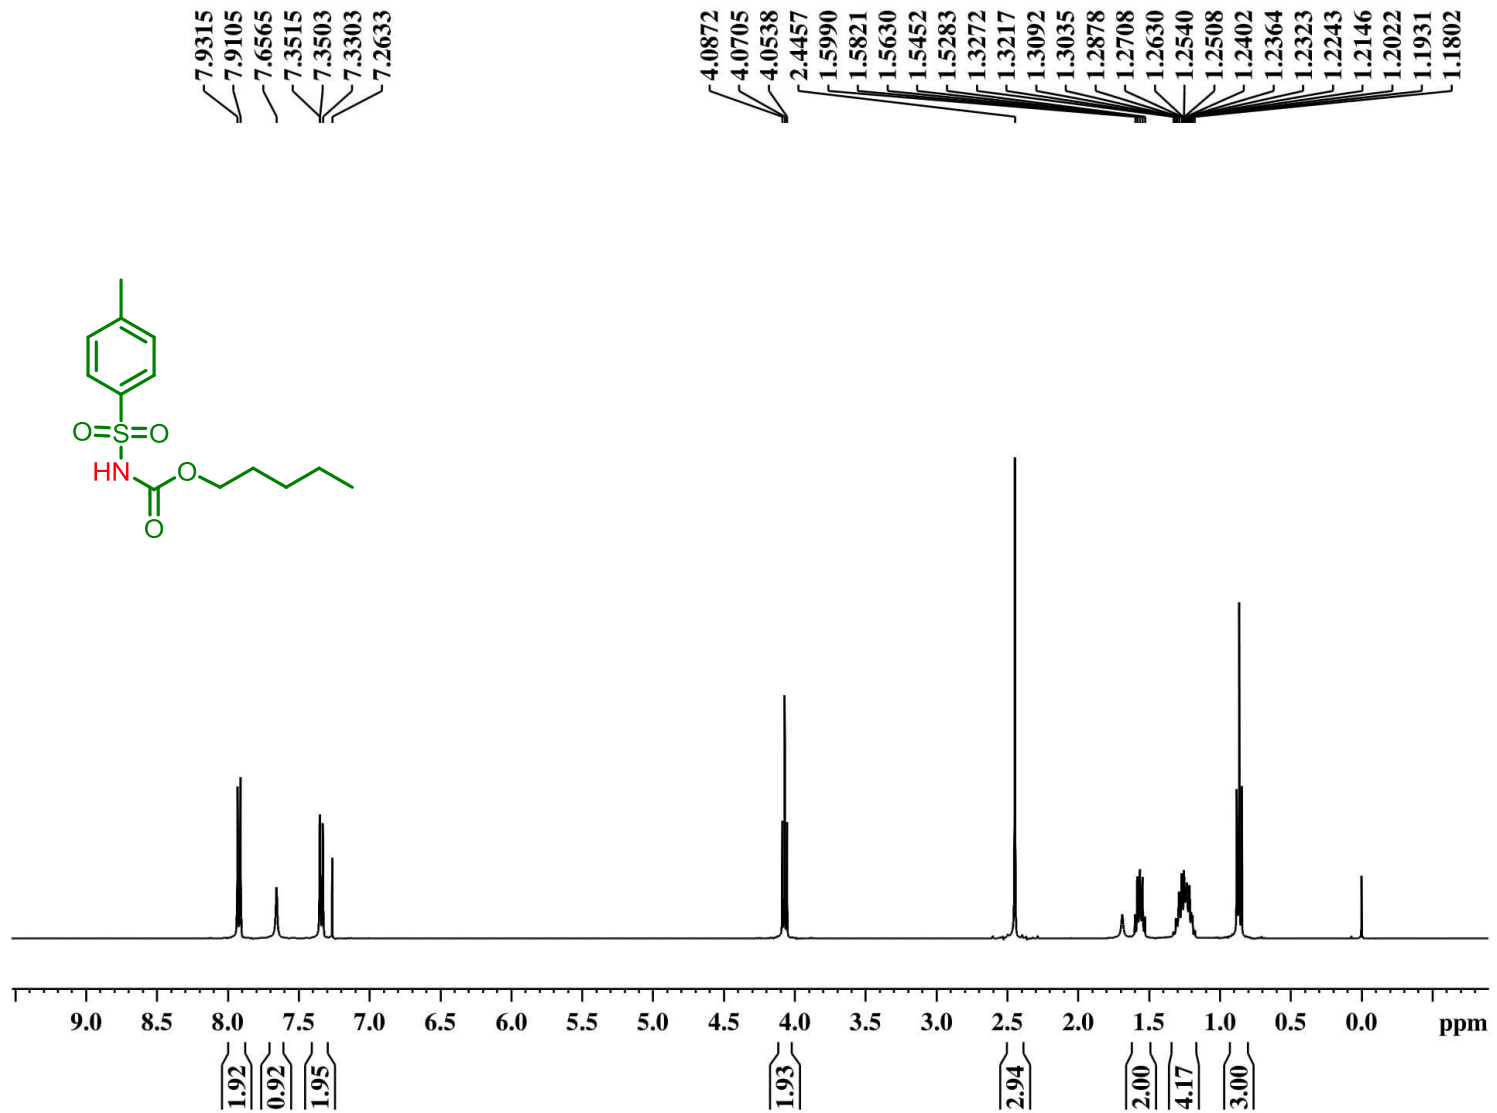

<sup>1</sup>H NMR spectrum of **2e** (400 MHz, CDCl<sub>3</sub>)

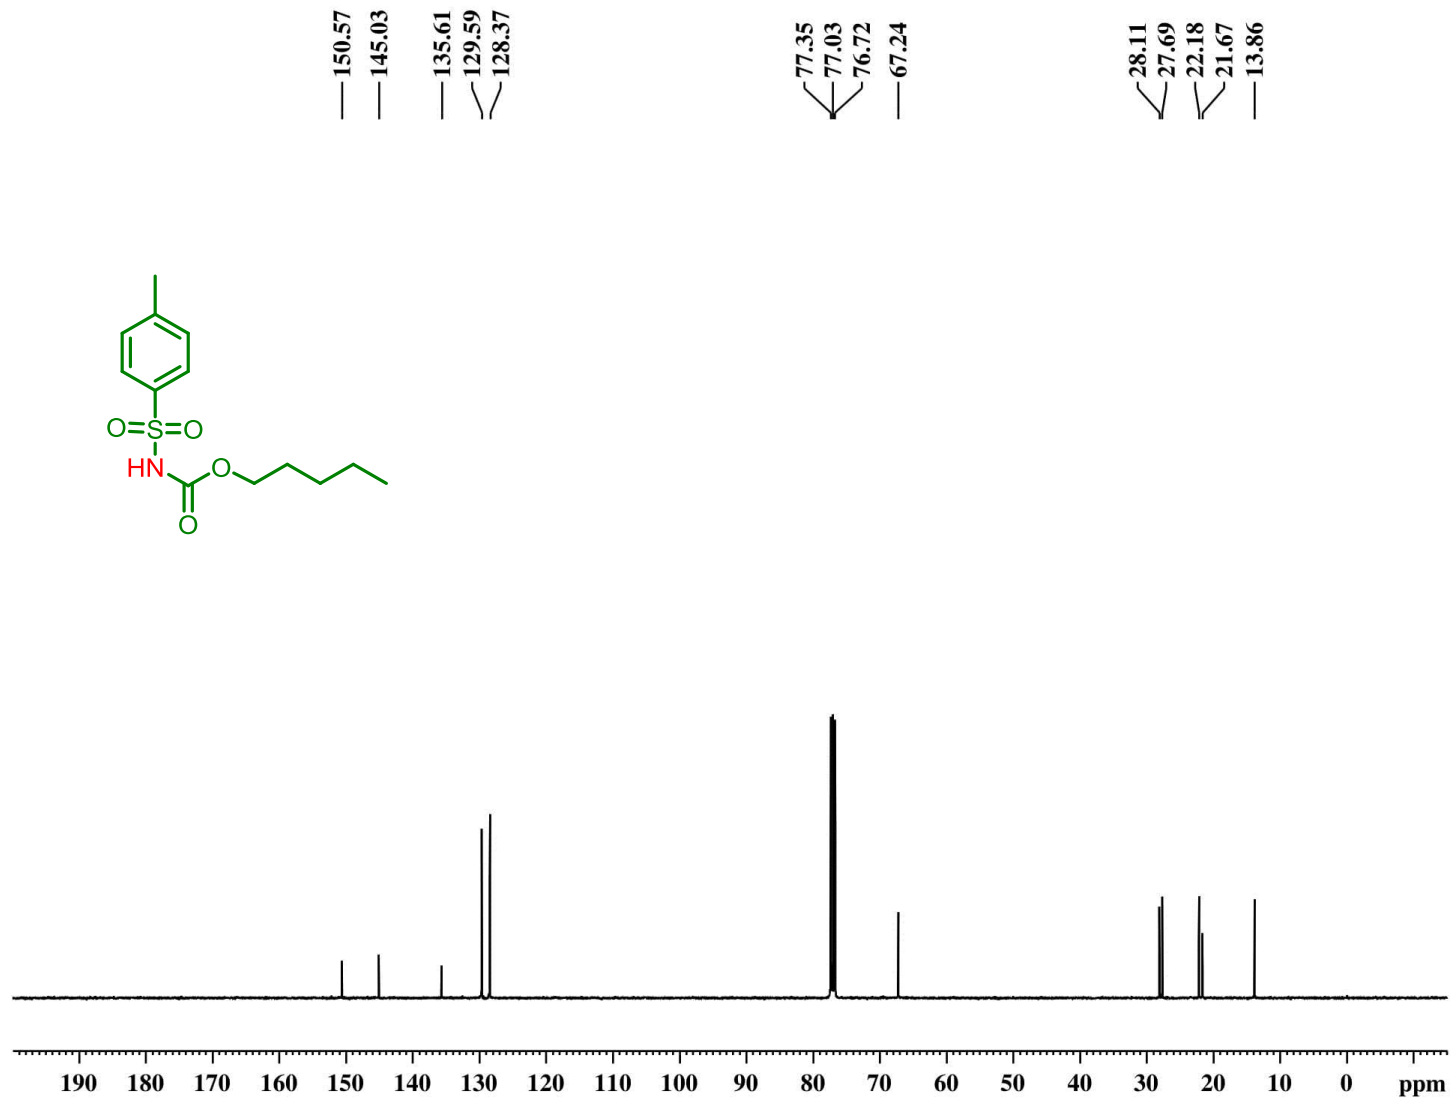

$^{13}\text{C}$  NMR spectrum of **2e** (100 MHz,  $\text{CDCl}_3$ )

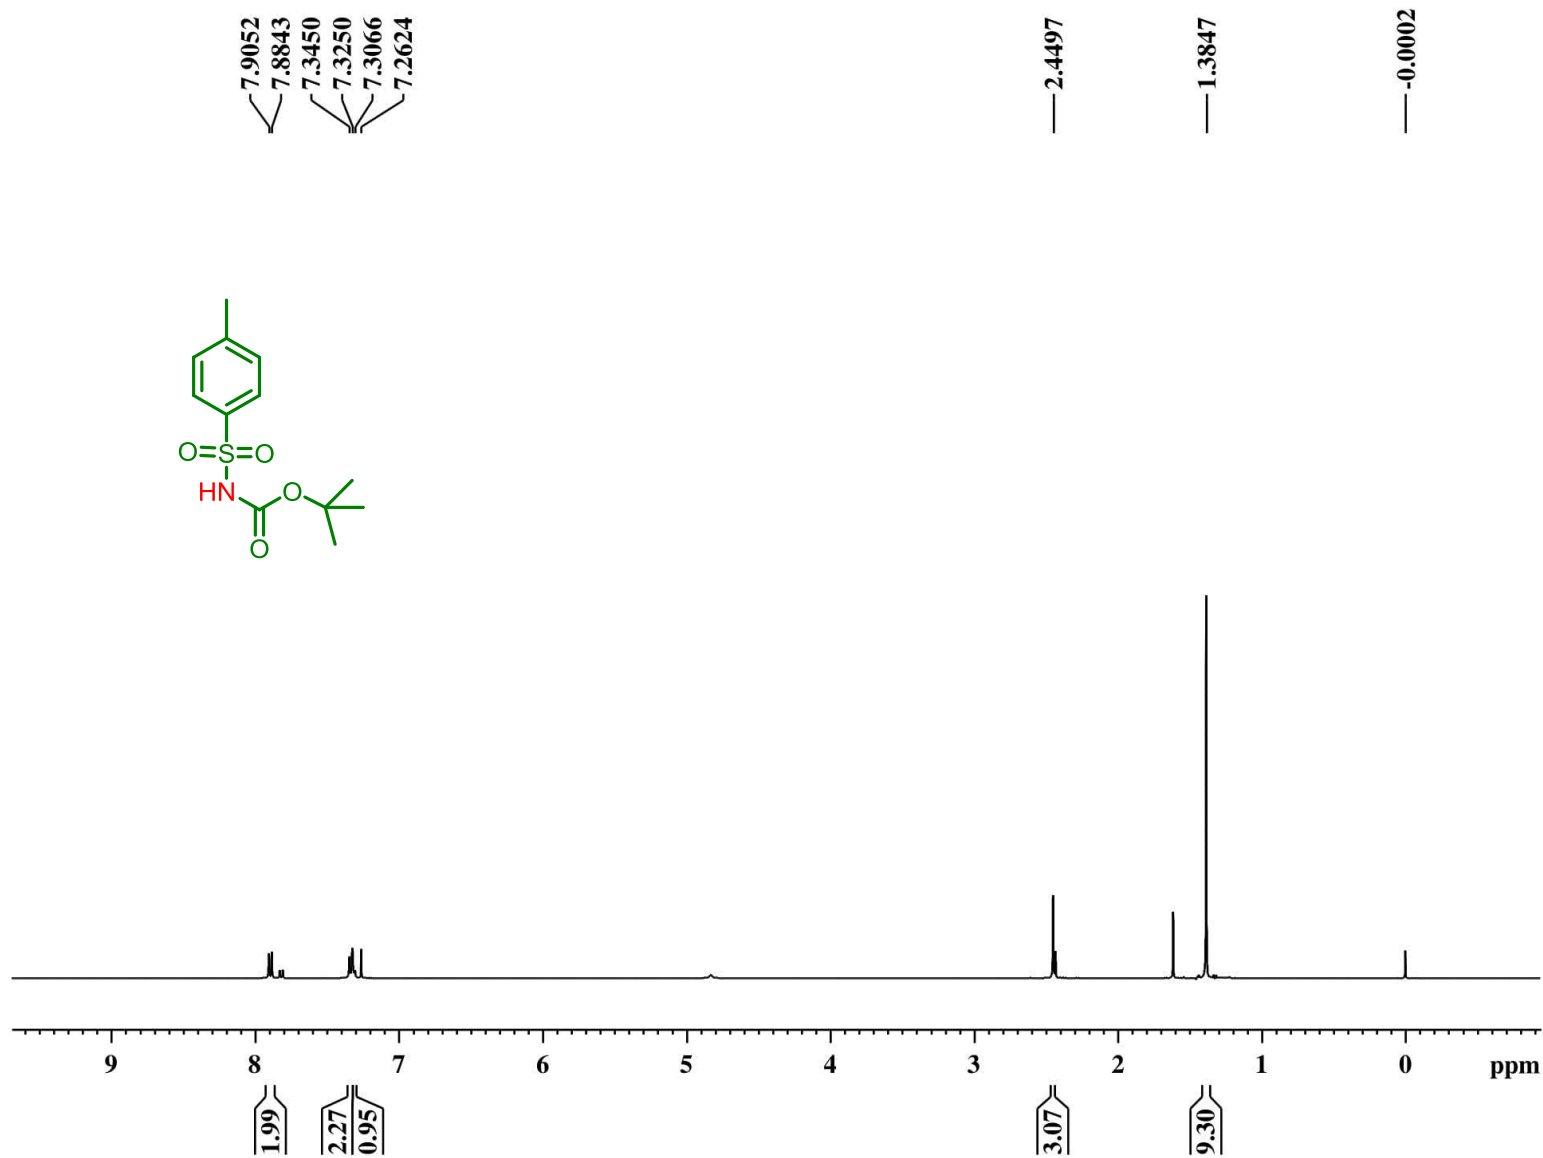

$^1\text{H}$  NMR spectrum of **2f** (400 MHz,  $\text{CDCl}_3$ )

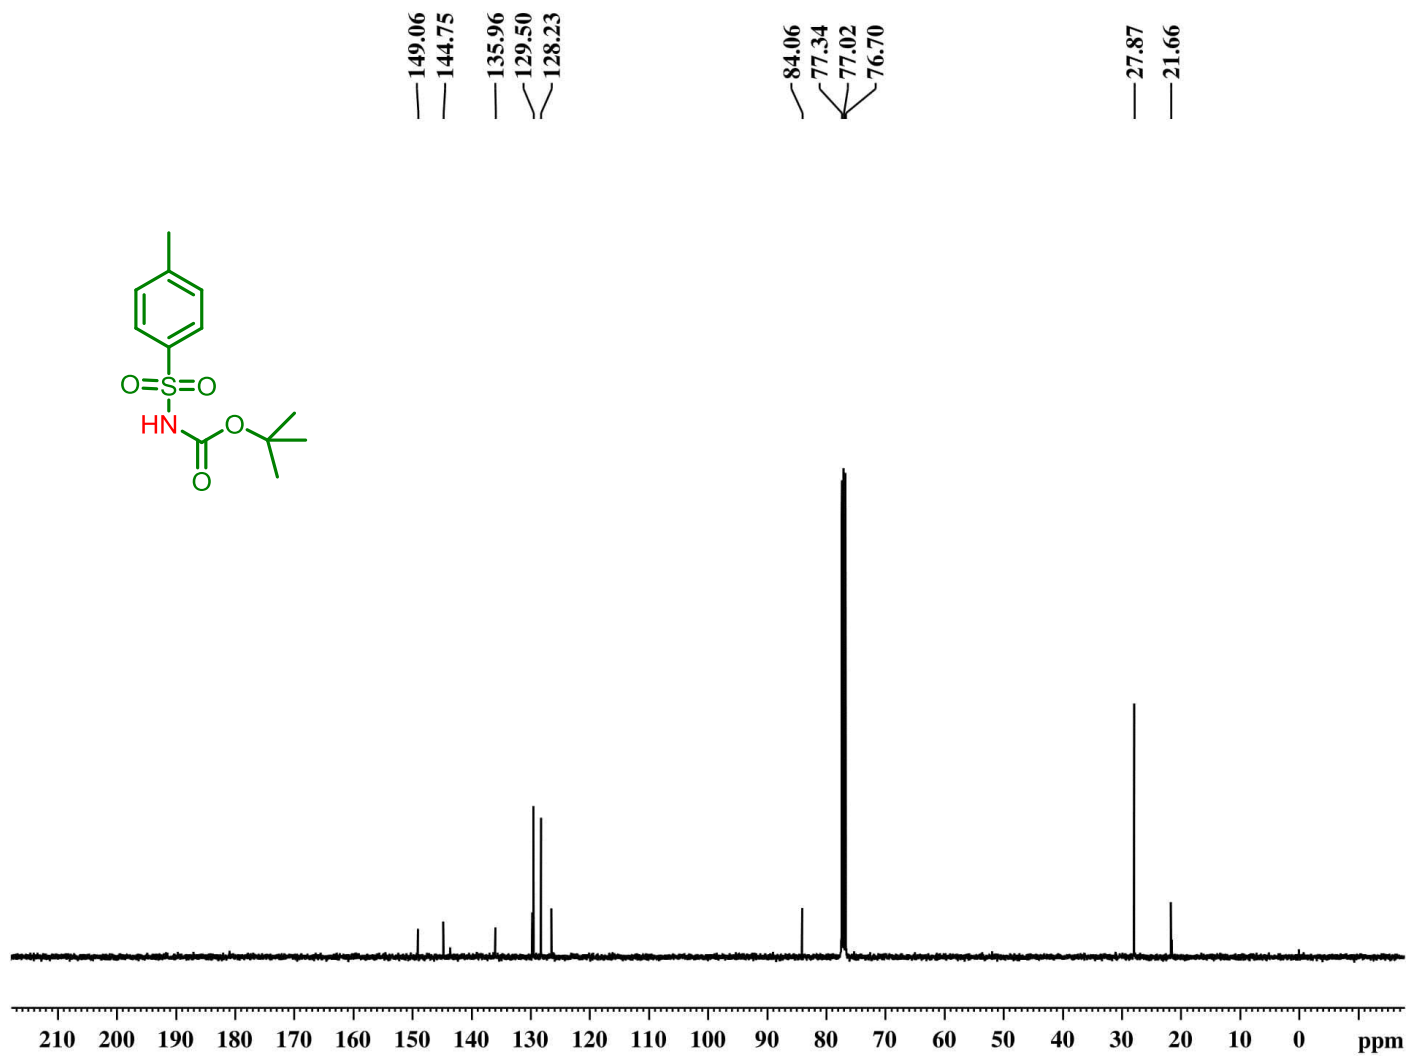

$^{13}\text{C}$  NMR spectrum of **2f** (100 MHz,  $\text{CDCl}_3$ )

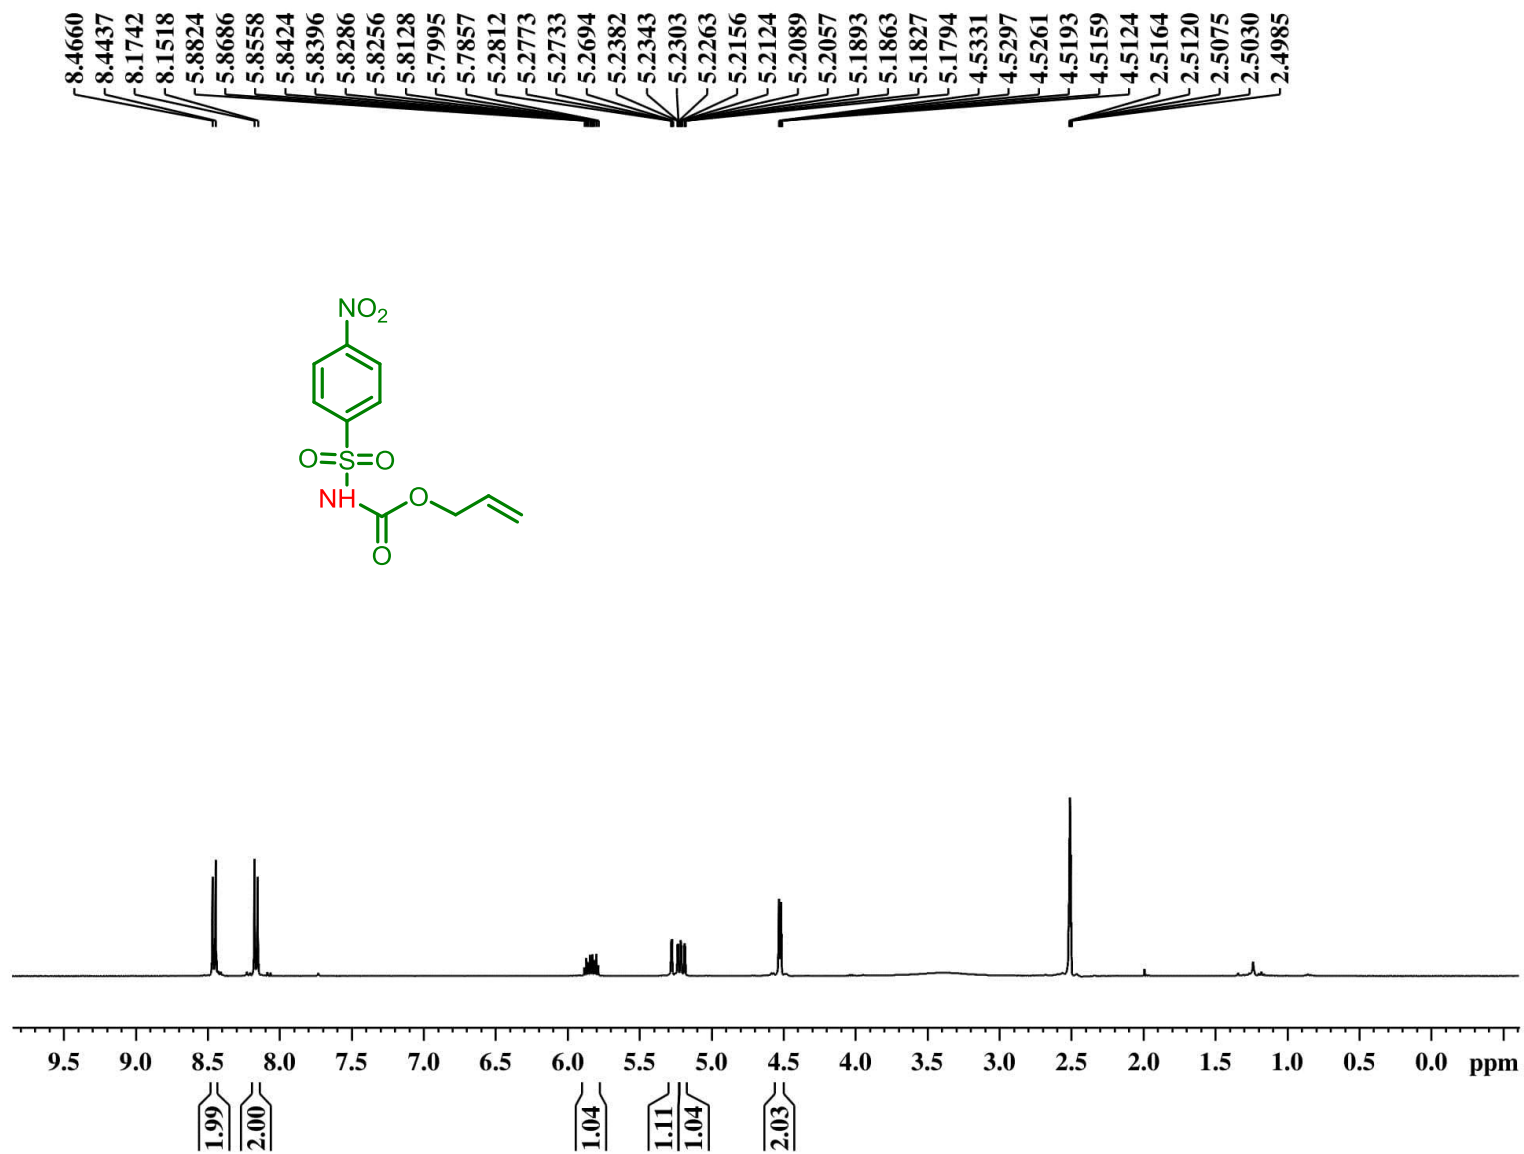

<sup>1</sup>H NMR spectrum of **2g** (400 MHz, CDCl<sub>3</sub>)

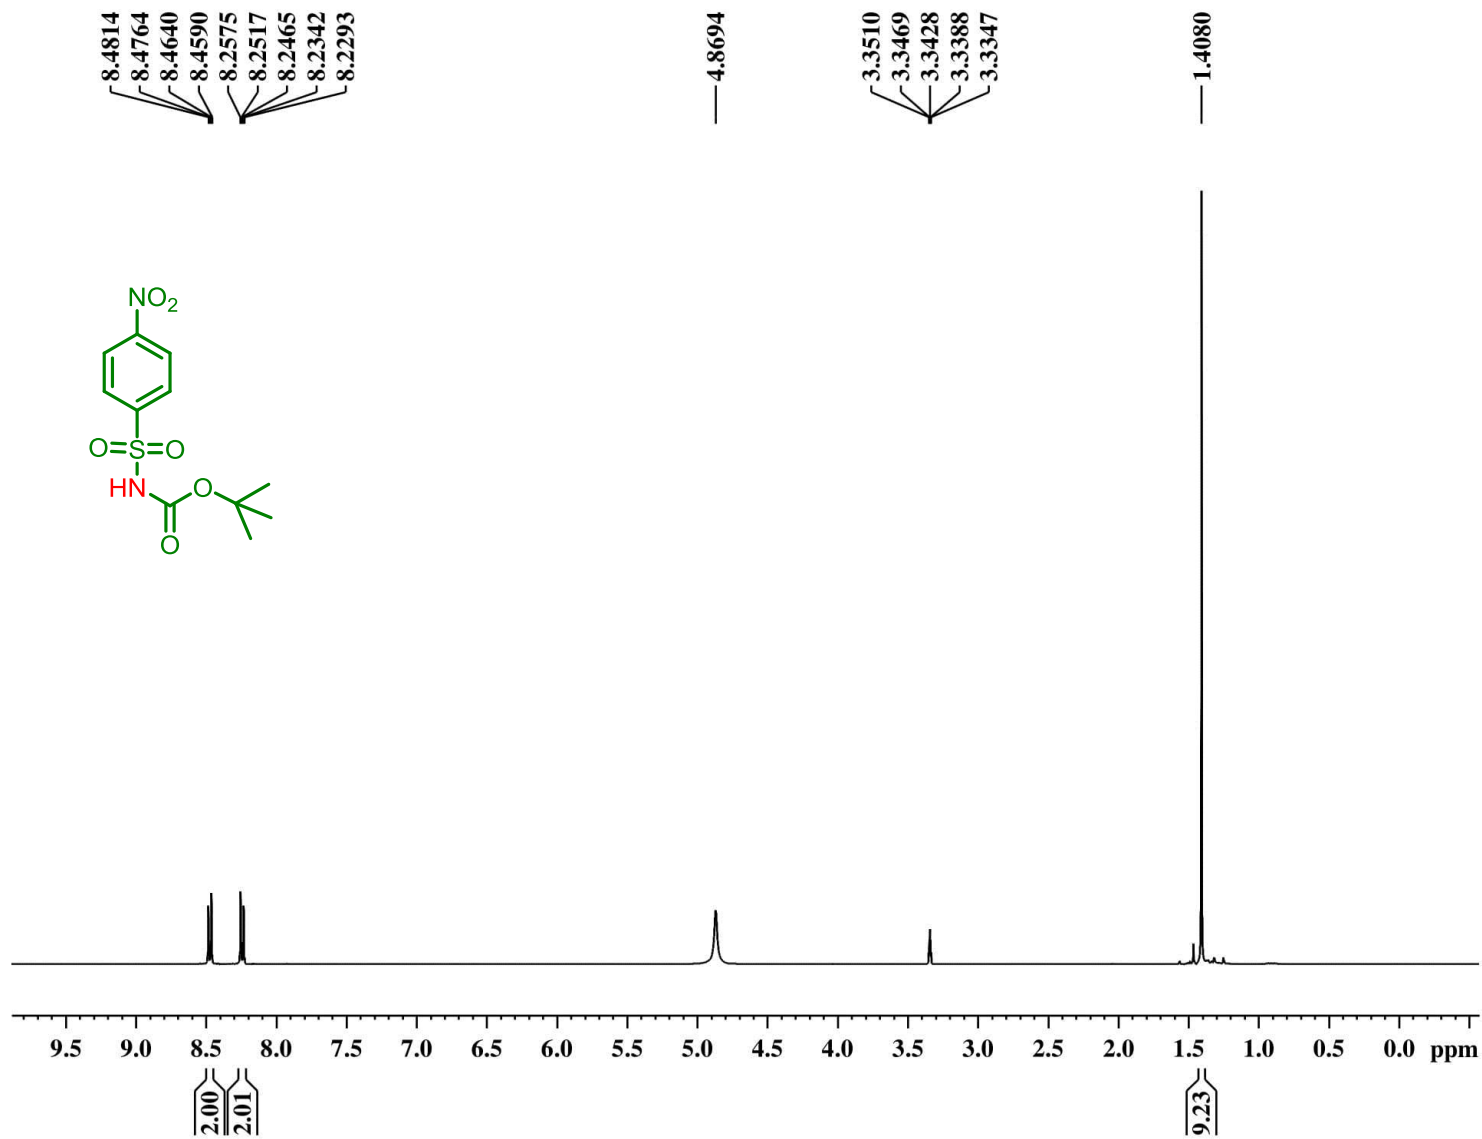

**<sup>1</sup>H NMR spectrum of **2h** (400 MHz, DMSO-d<sub>6</sub>)**

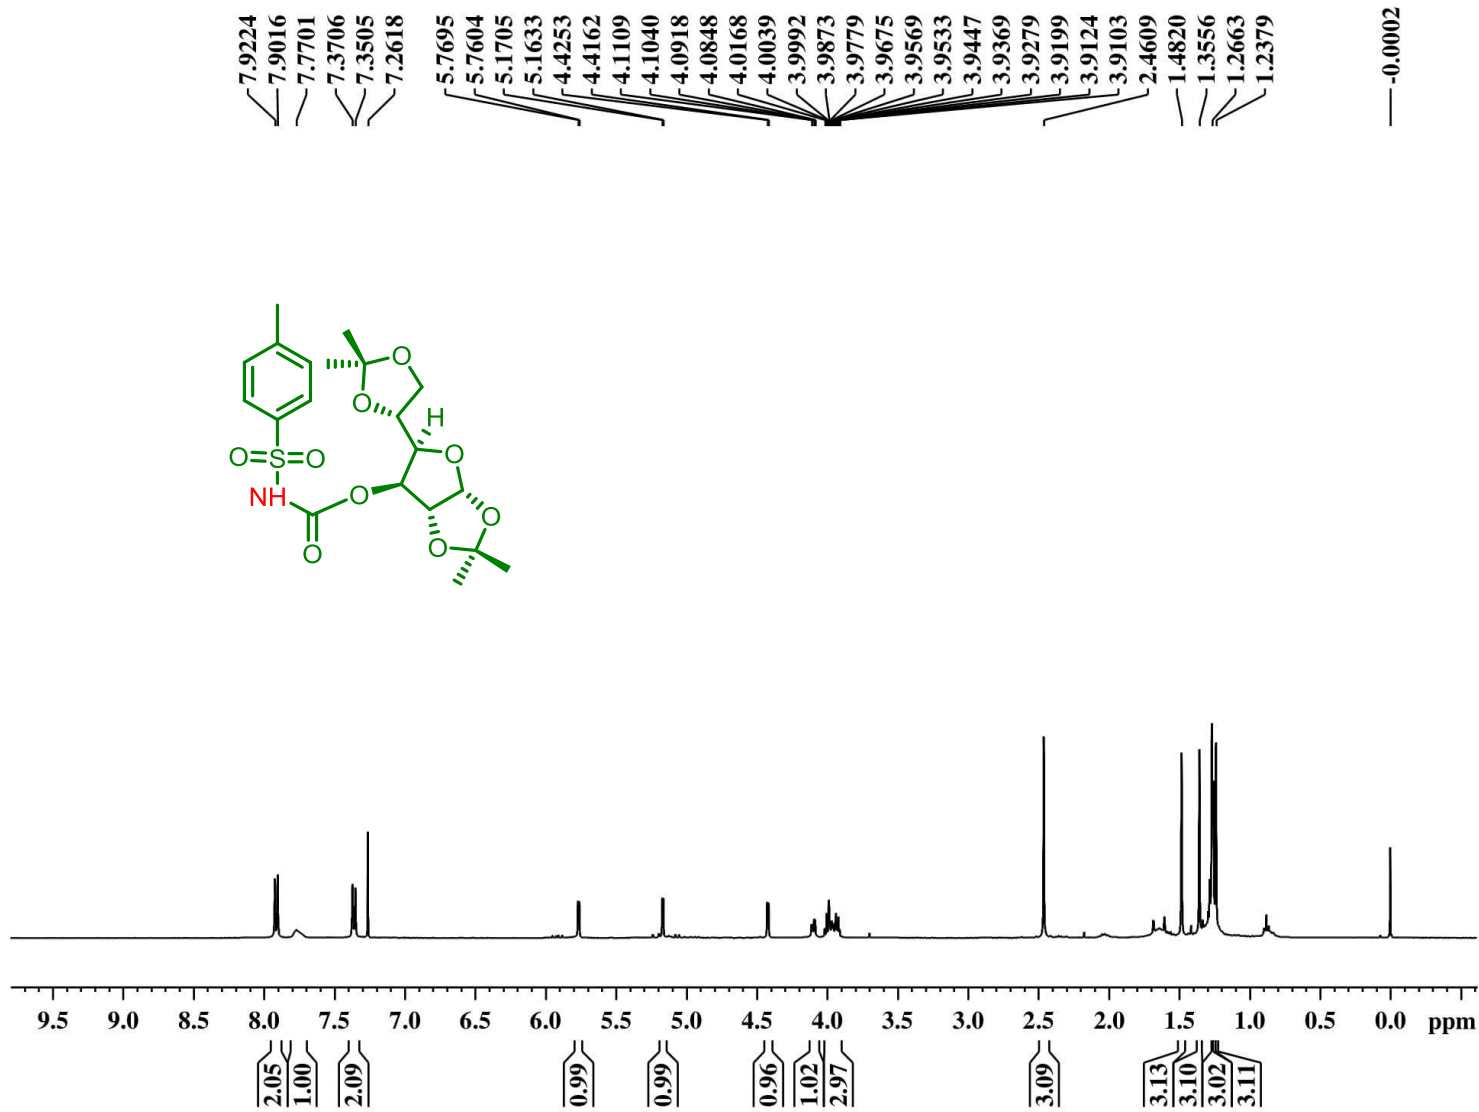

<sup>1</sup>H NMR spectrum of **2i** (400 MHz, CDCl<sub>3</sub>)

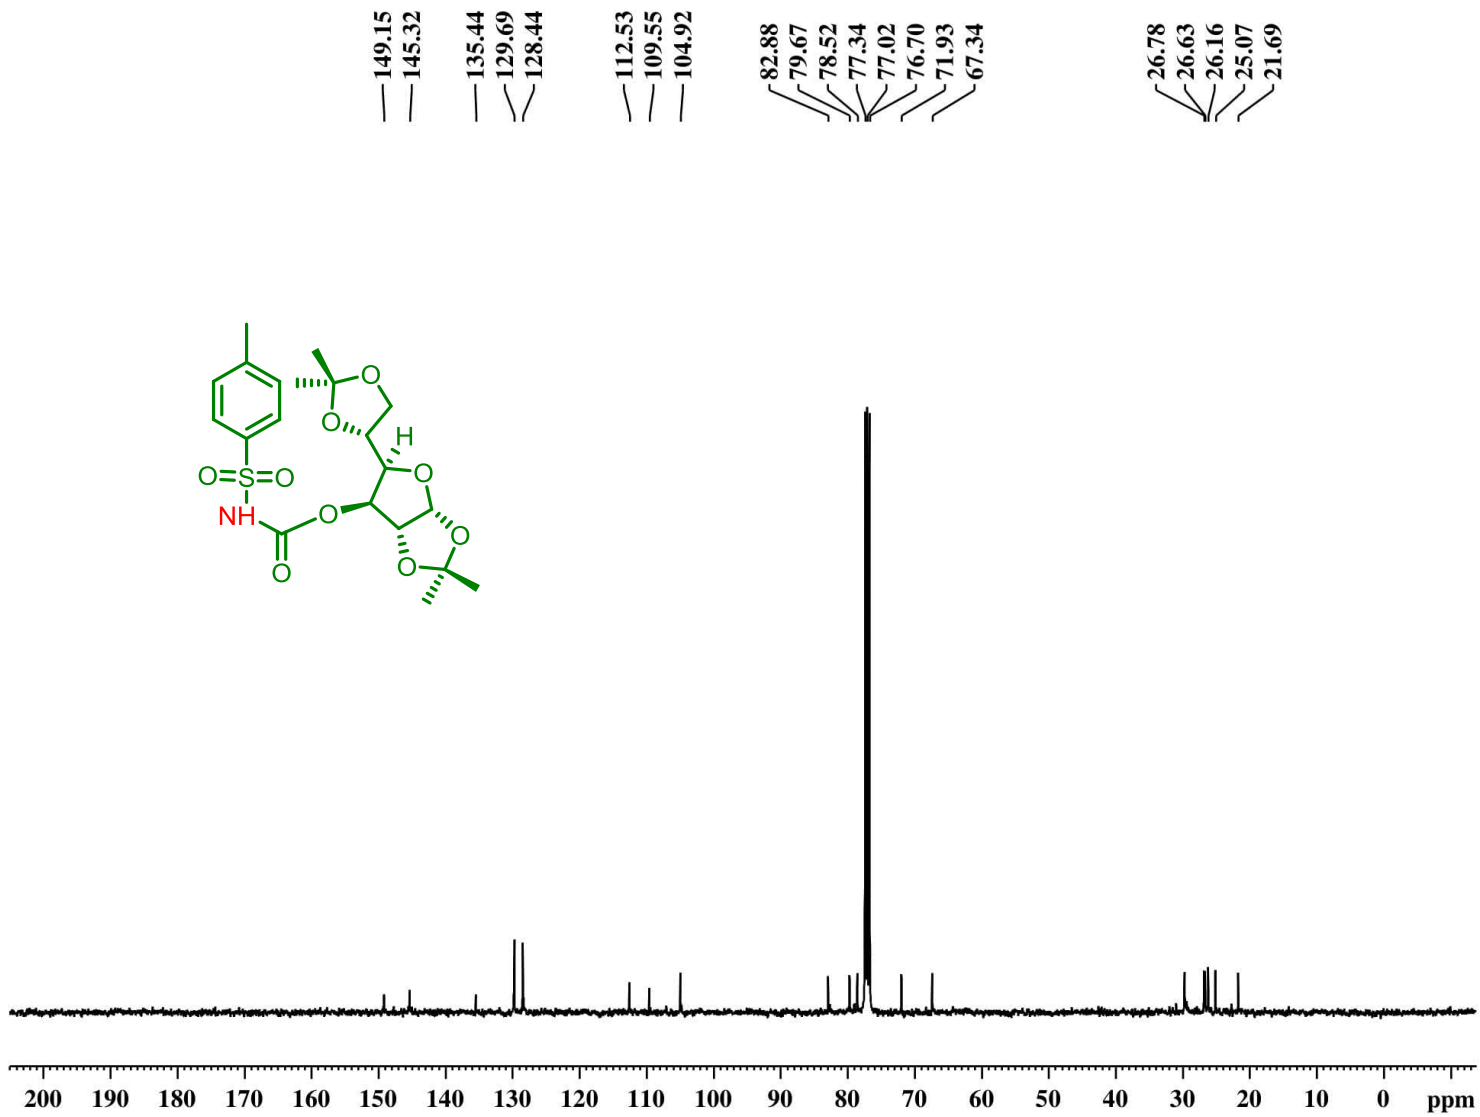

<sup>13</sup>C NMR spectrum of **2i** (100 MHz, MHz, CDCl<sub>3</sub>)



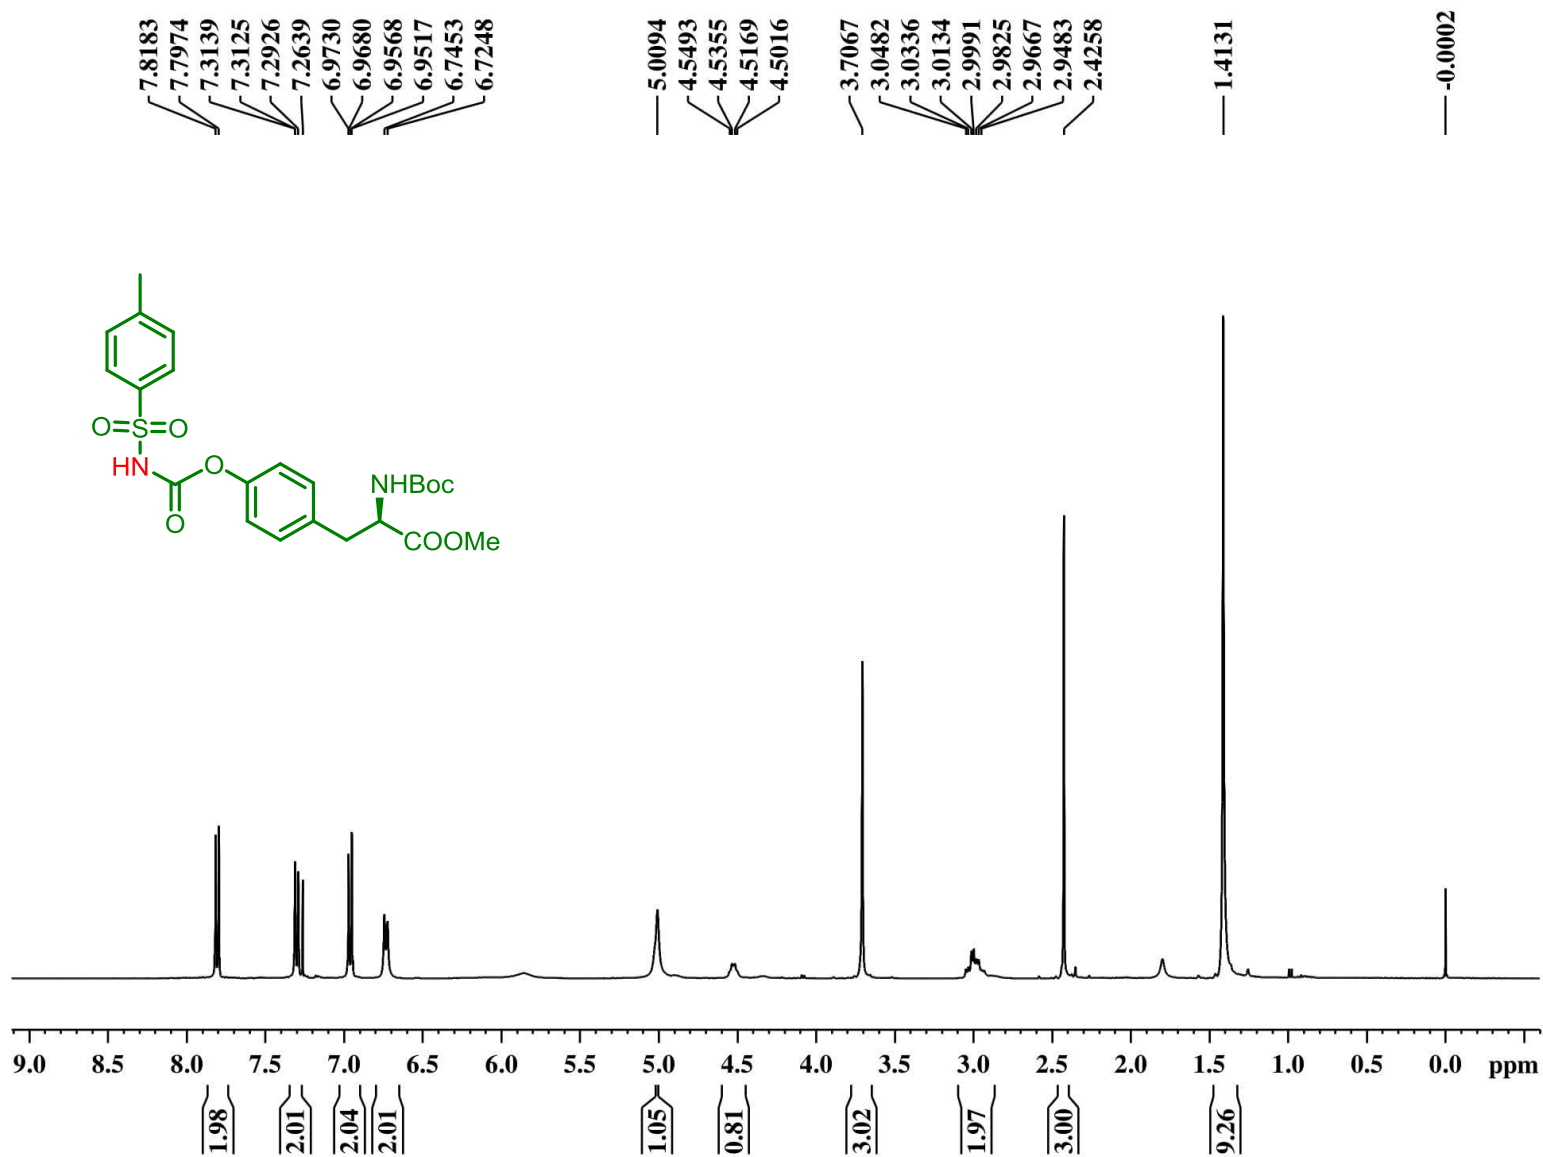

$^1\text{H}$  NMR spectrum of **2j** (400 MHz,  $\text{CDCl}_3$ )

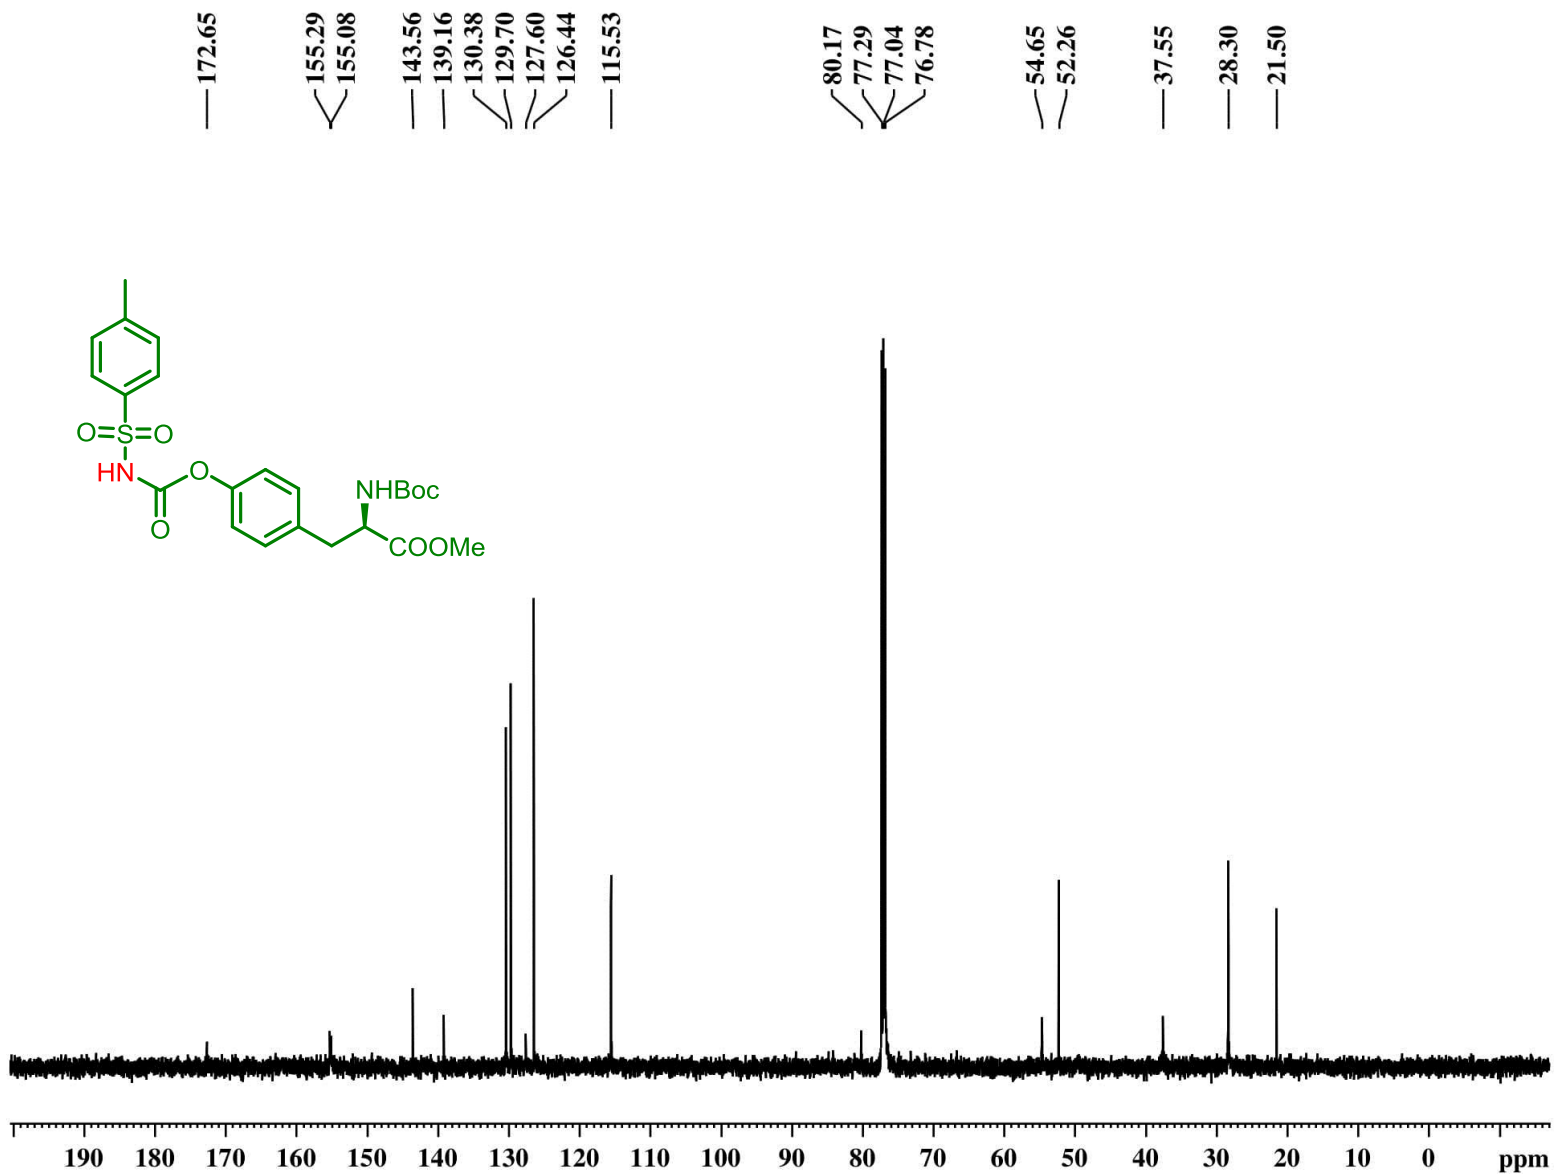

<sup>13</sup>C NMR spectrum of **2j** (100 MHz, MHz, CDCl<sub>3</sub>)

7. Confirmation the exact structure **3a** by NMR (**NOESY correlation**) and Spectra Data, HRMS of all the synthesized *N*-glycofuranosides (**3a-3z, 3v' , 3aa**)

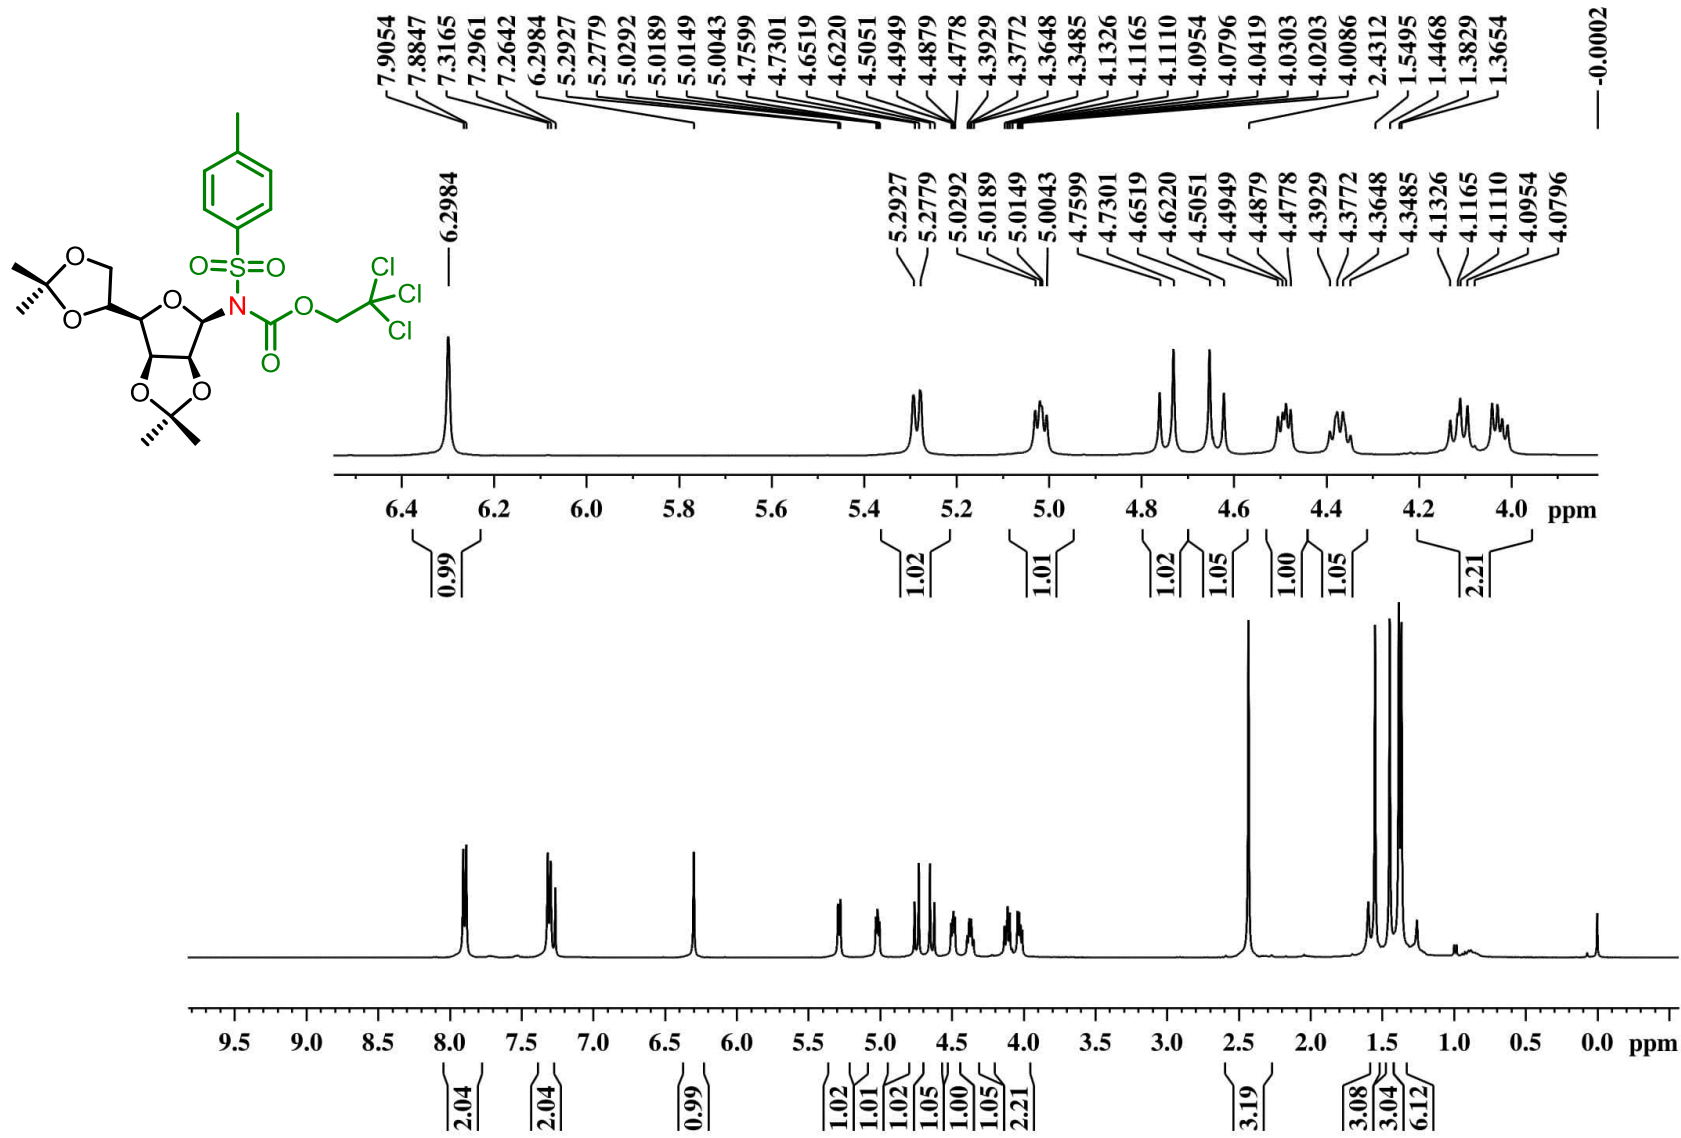

<sup>1</sup>H NMR spectrum of **3a** (400 MHz, CDCl<sub>3</sub>)

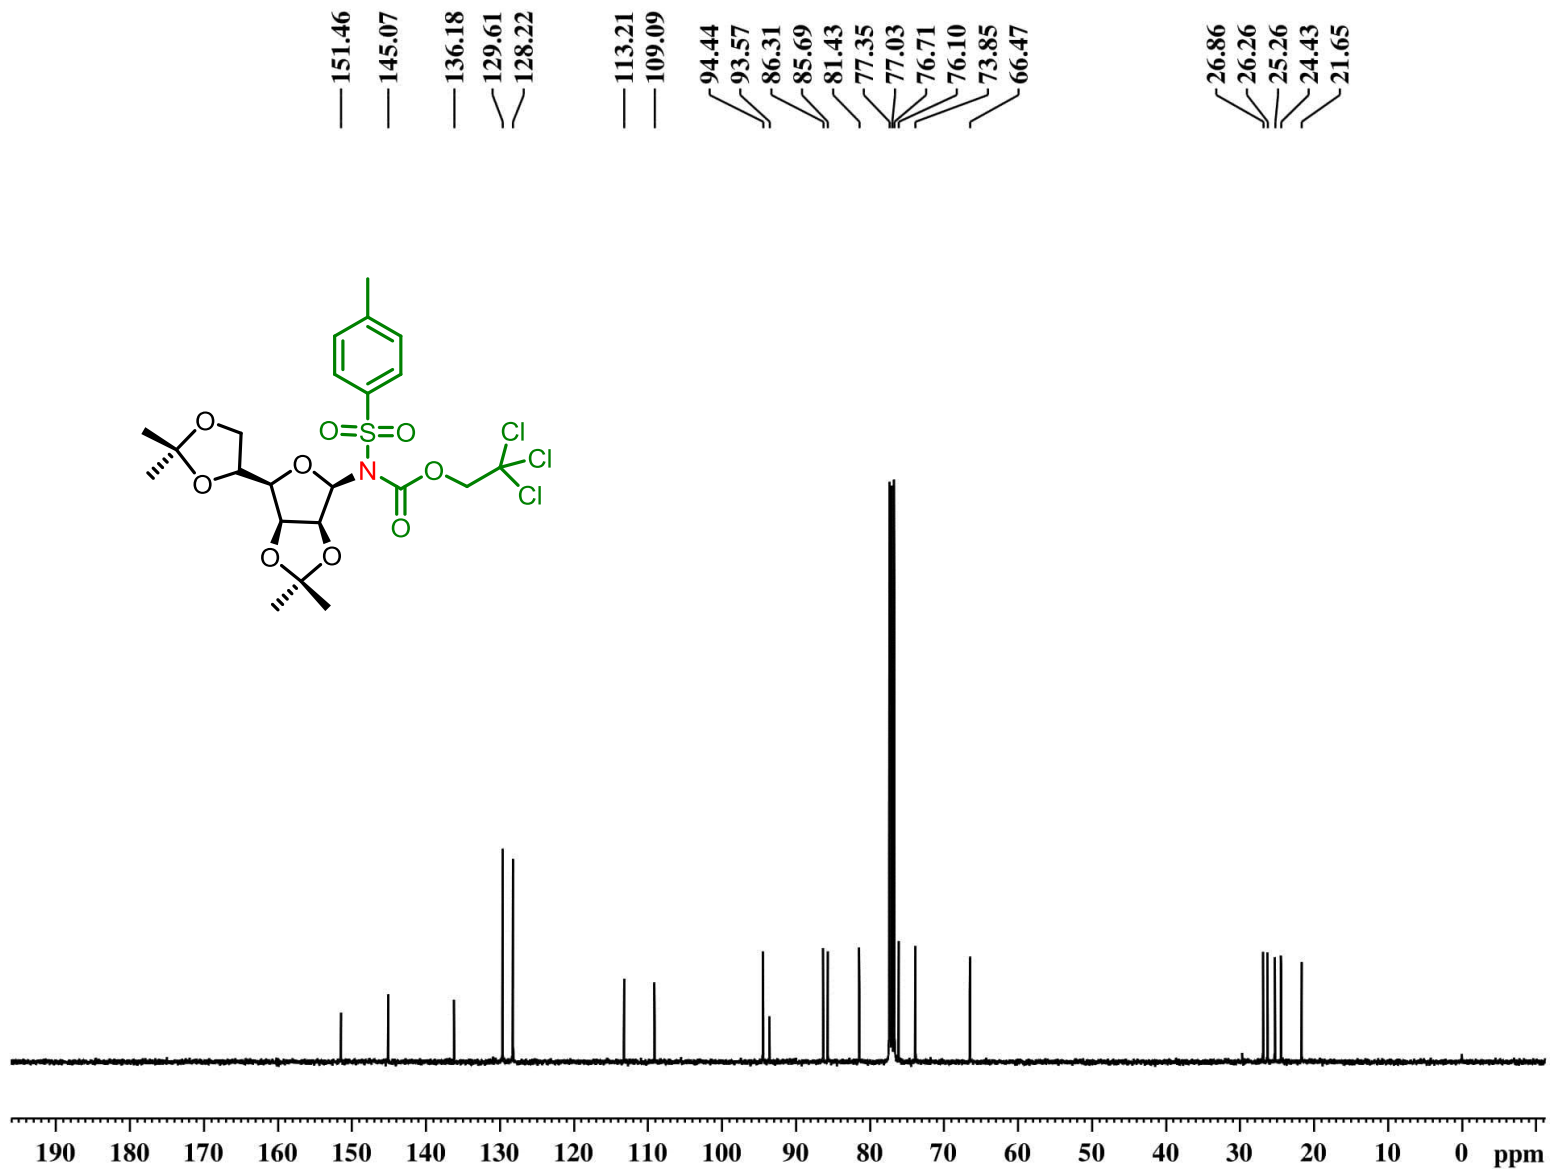

<sup>13</sup>C NMR spectrum of **3a** (100 MHz, MHz, CDCl<sub>3</sub>)

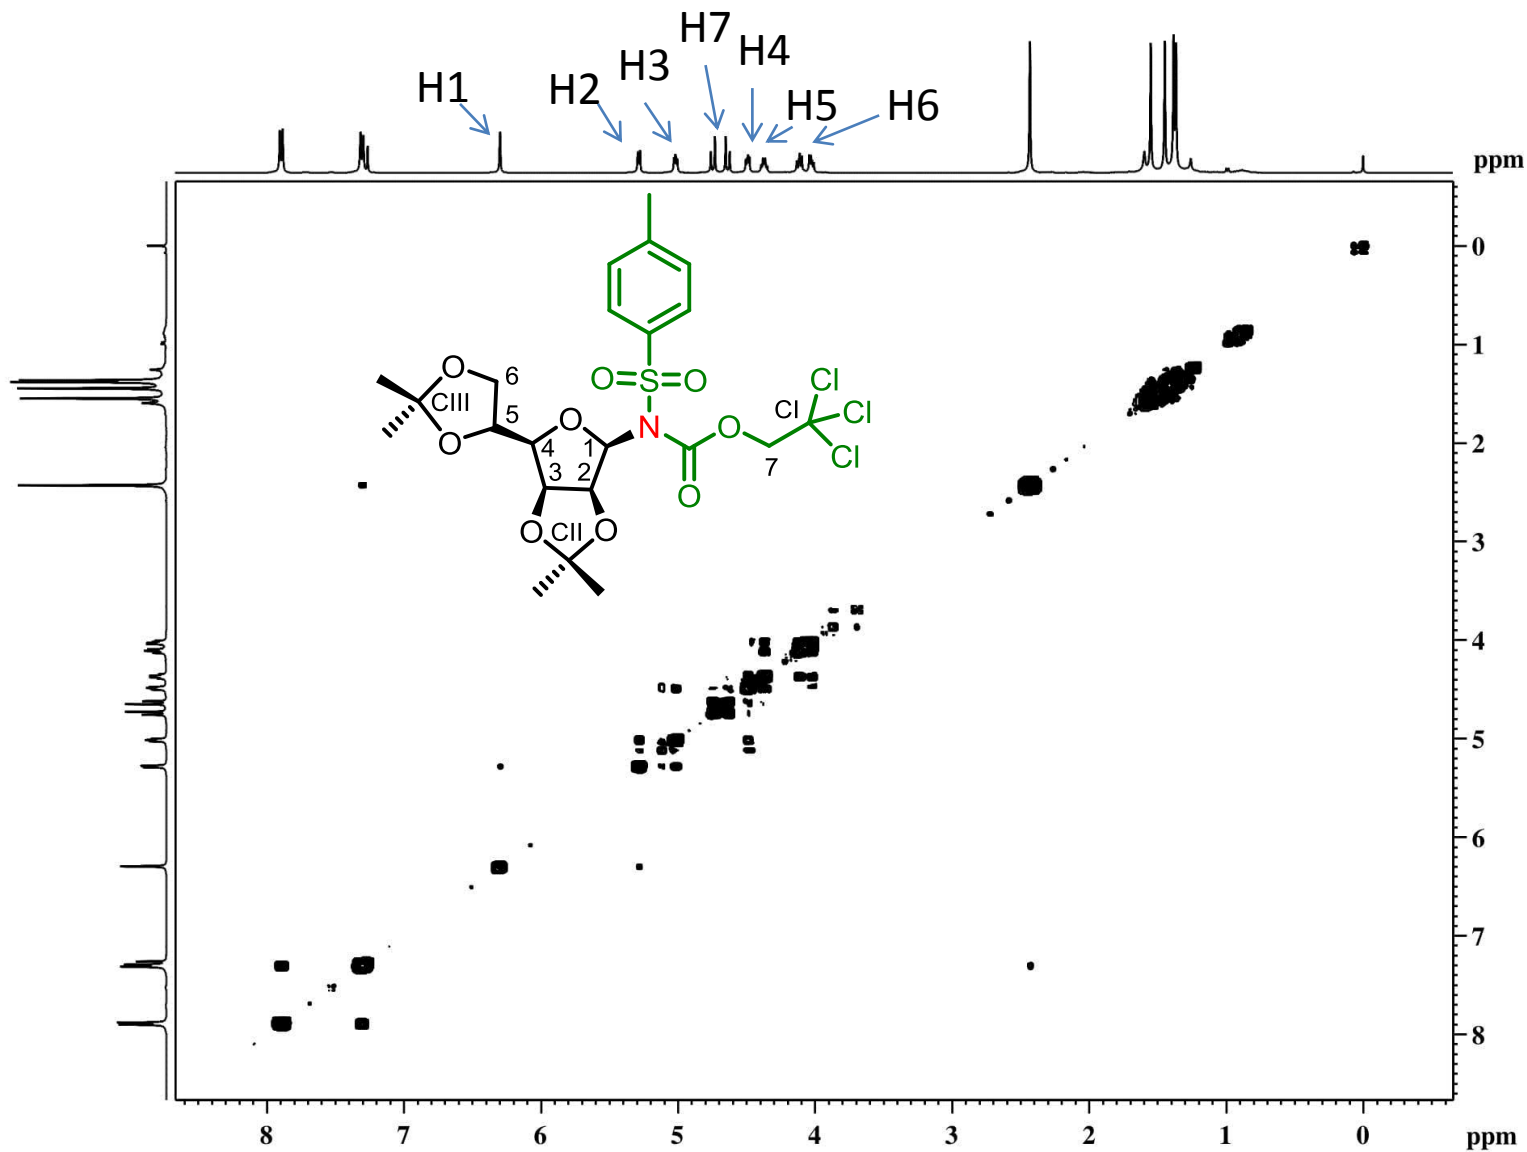

2D COSY spectrum of **3a** (400 MHz, MHz, CDCl<sub>3</sub>)

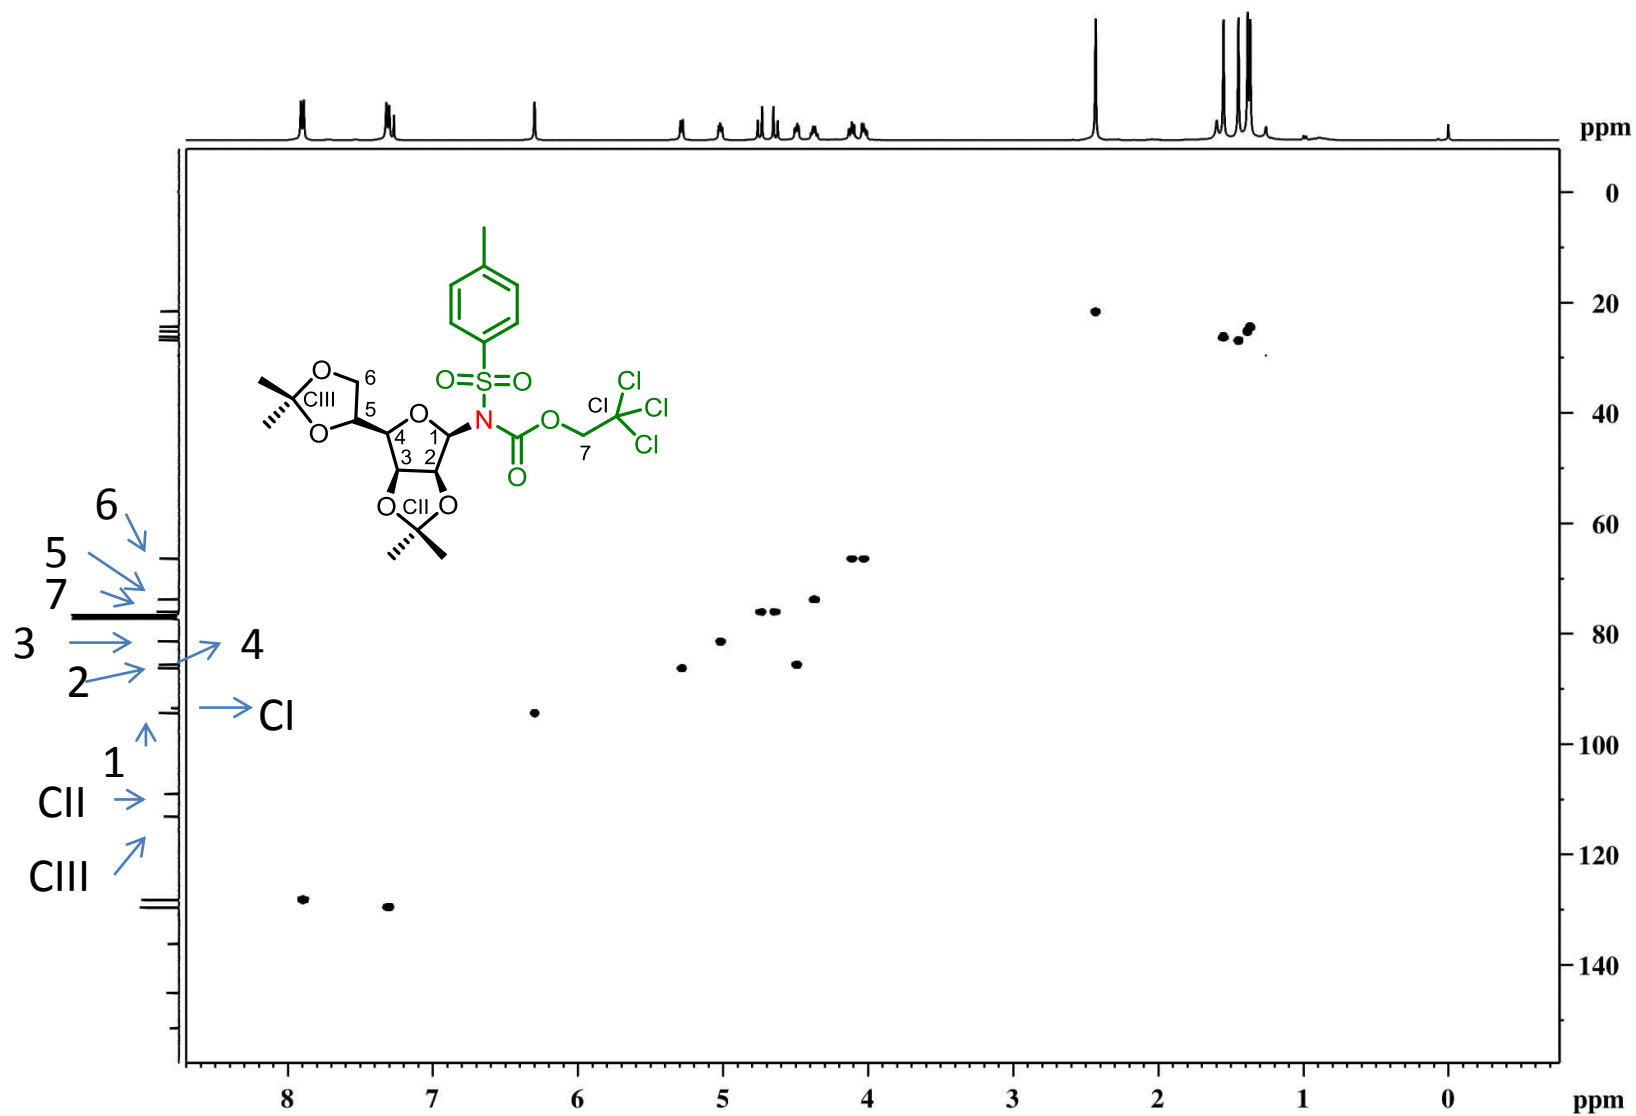

2D HSQC spectrum of **3a** ( $\text{CDCl}_3$ ).

NOESY expansion of **3a**, the characteristic nOe's of H2/H1, H4/H1, and H4/H3 are labelled.

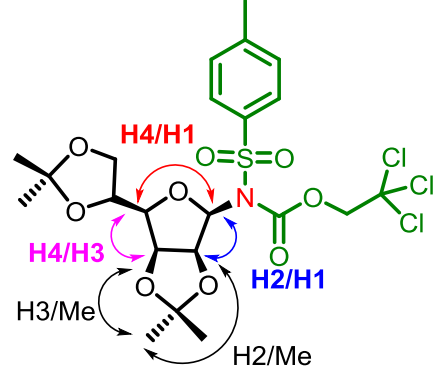

Cross peaks

(H-1,  $\delta$  6.29)-(H-2,  $\delta$  5.28)

(H-1,  $\delta$  6.29)-(H-4,  $\delta$  4.49)

(H-2,  $\delta$  5.28)-(Me,  $\delta$  1.37)

(H-3,  $\delta$  5.02)-(H-4,  $\delta$  4.49)

(H-3,  $\delta$  5.02)-(Me,  $\delta$  1.37)

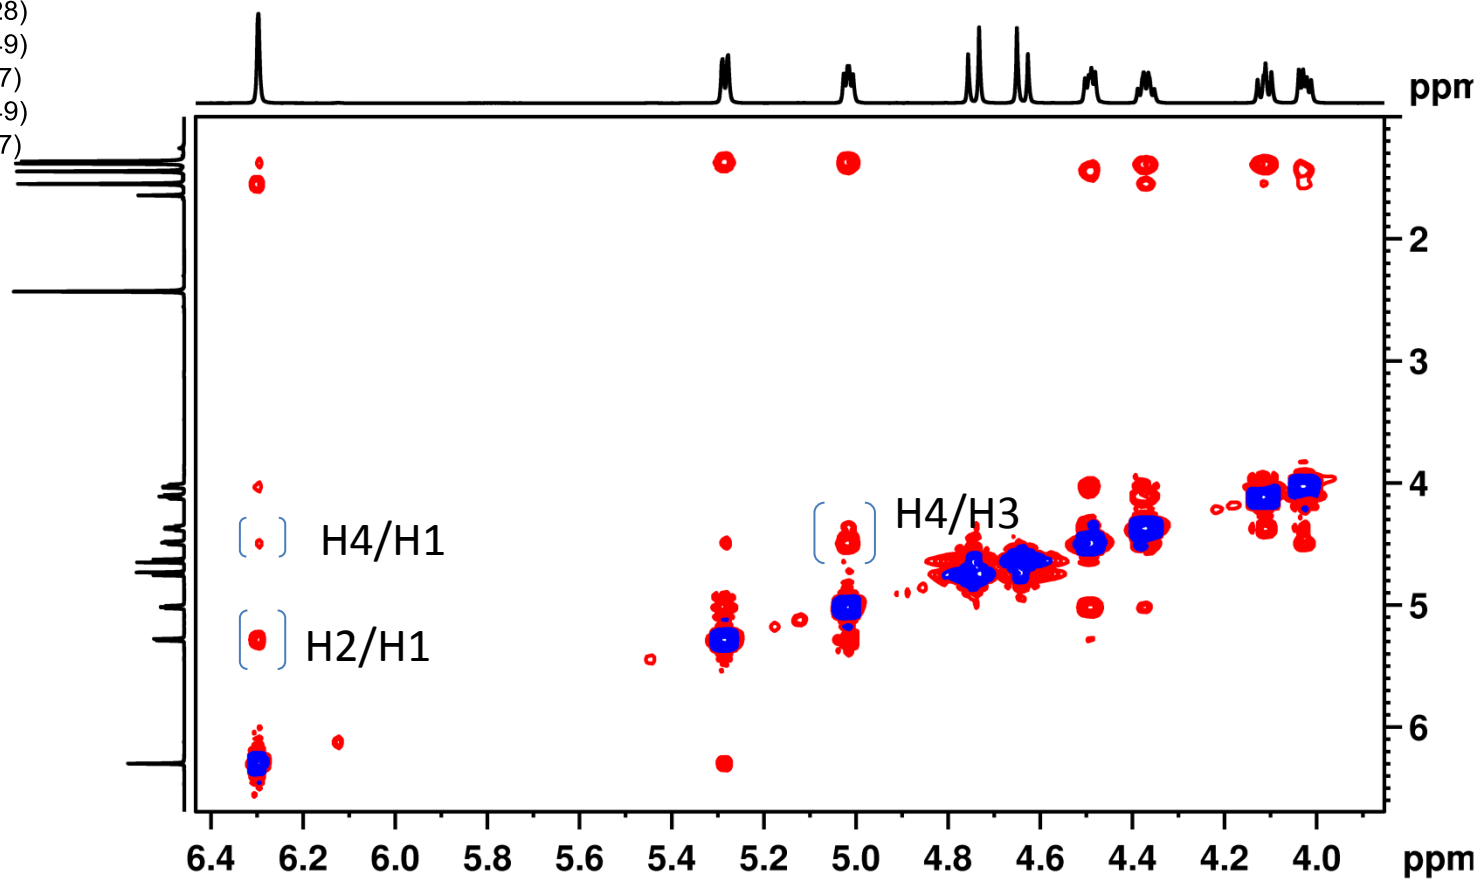

2D NOESY spectrum of **3a** (CDCl<sub>3</sub>) Expansion.



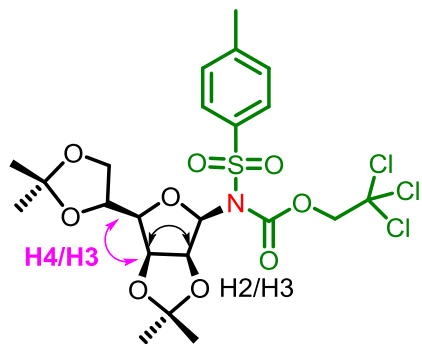

NOESY expansion of **3a**, the characteristic nOe's of H2/H3 and H3/H4 are labelled.

Cross peaks

(H-2,  $\delta$  5.28)-(H-3,  $\delta$  5.02)

(H-3,  $\delta$  5.02)-(H-4,  $\delta$  4.49)

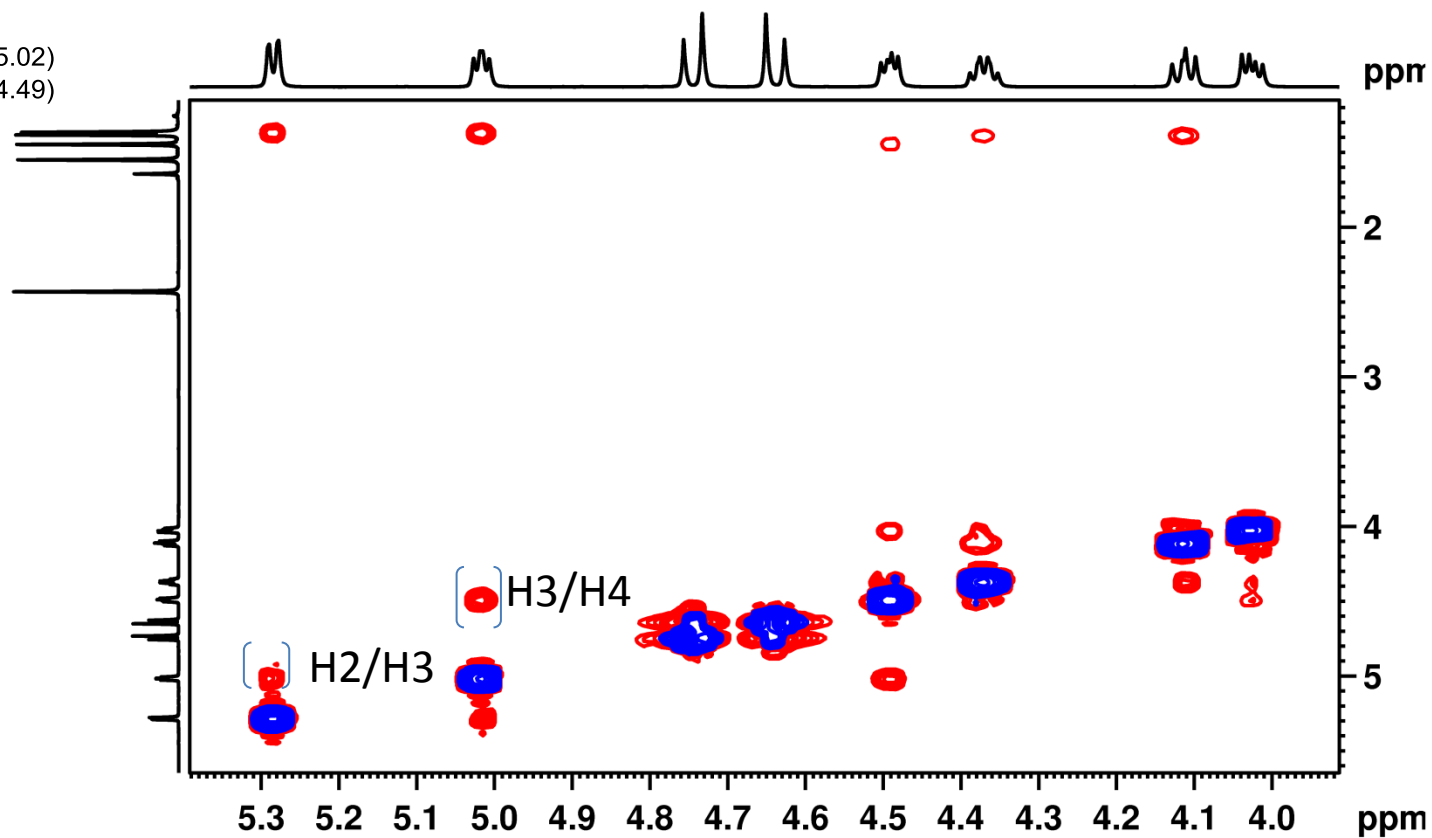

2D NOESY spectrum of **3a** (CDCl<sub>3</sub>) Expansion.

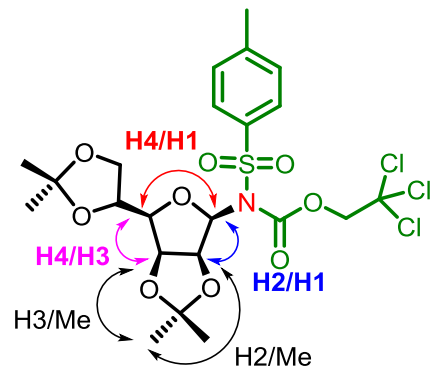

(H-2,  $\delta$  5.28)-(Me,  $\delta$  1.37)  
 (H-3,  $\delta$  5.02)-(Me,  $\delta$  1.37)

NOESY expansion of **3a**, the characteristic nOe's of H2/Me and H3/Me are labelled.

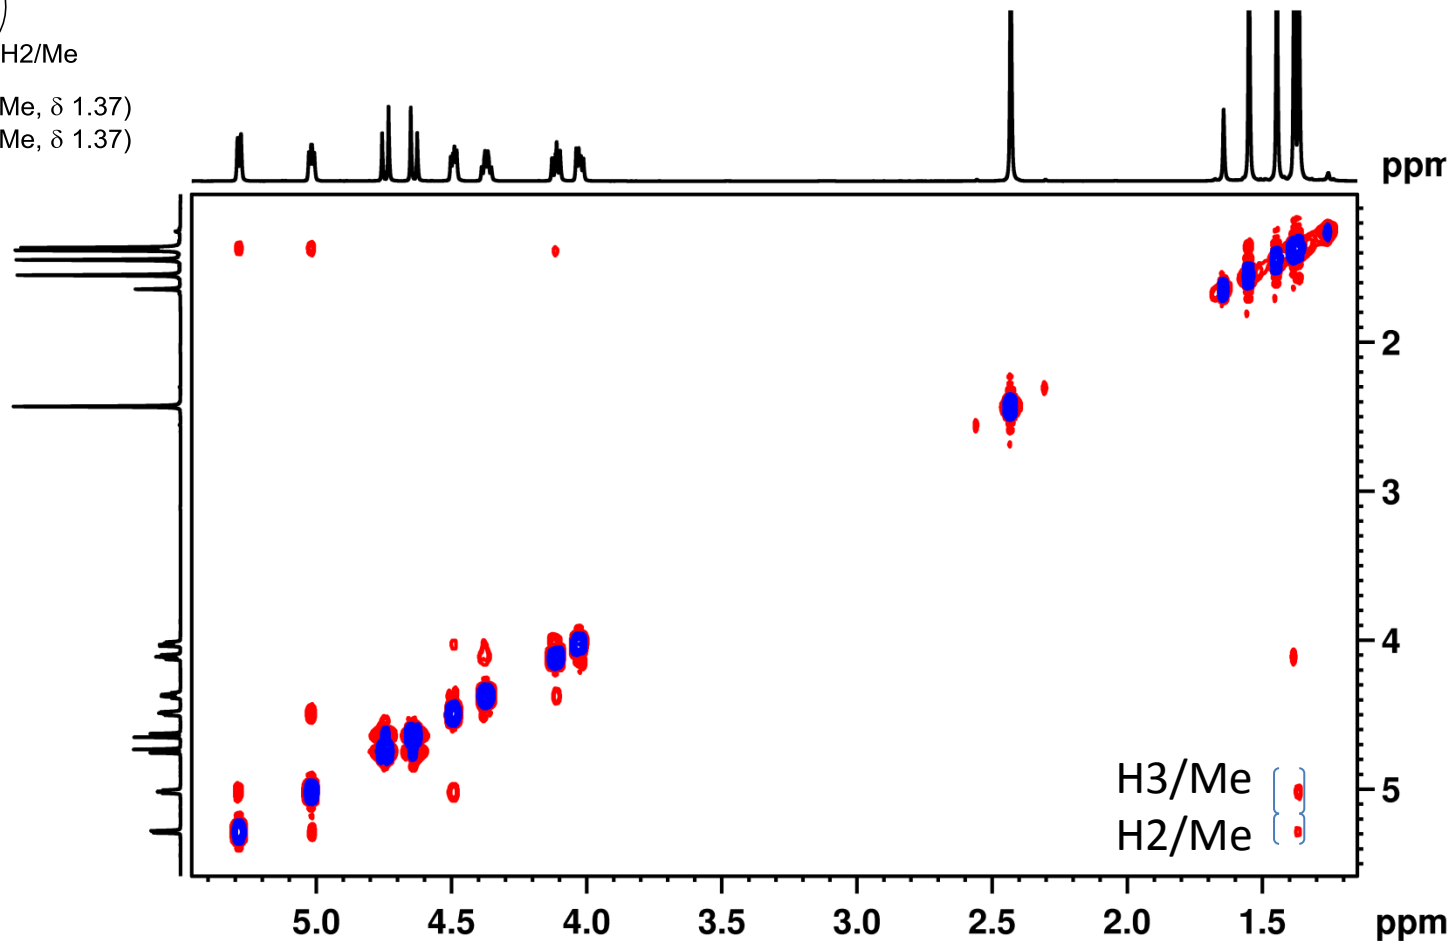

2D NOESY spectrum of **3a** (CDCl<sub>3</sub>) Expansion).

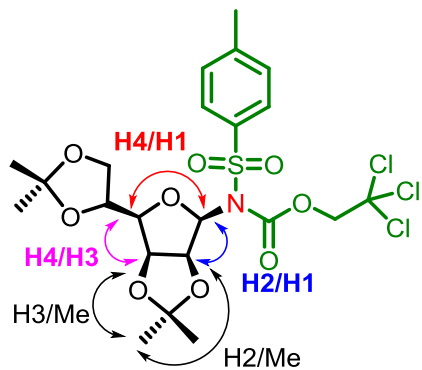

Cross peaks

- (H-1,  $\delta$  6.29)-(H-2,  $\delta$  5.28)
- (H-1,  $\delta$  6.29)-(H-4,  $\delta$  4.49)
- (H-2,  $\delta$  5.28)-(Me,  $\delta$  1.37)
- (H-3,  $\delta$  5.02)-(H-4,  $\delta$  4.49)
- (H-3,  $\delta$  5.02)-(Me,  $\delta$  1.37)

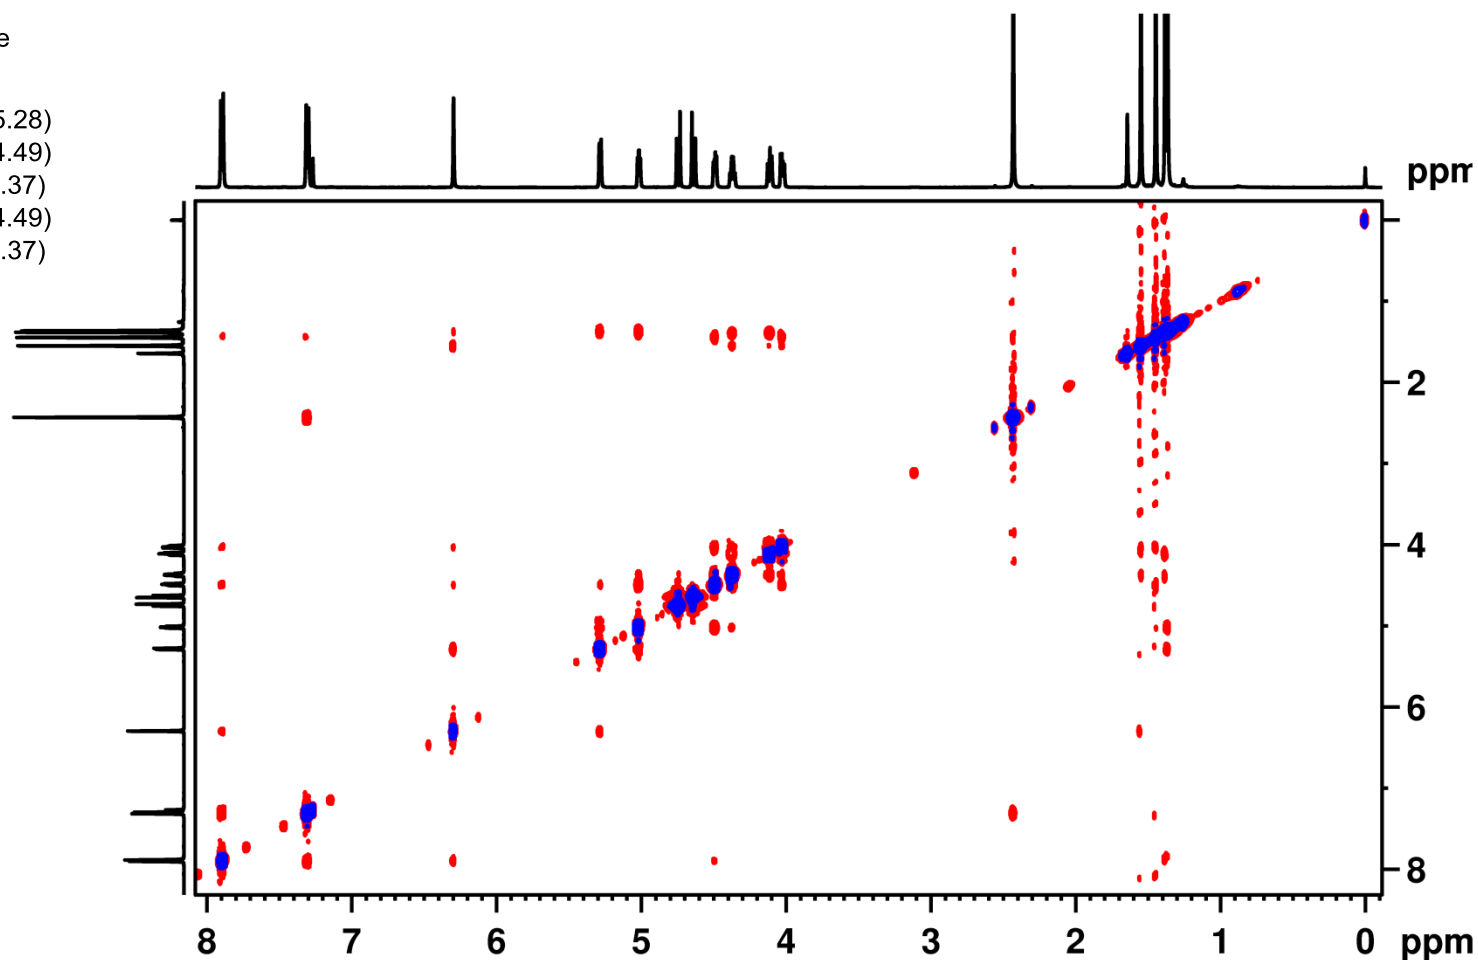

2D NOESY spectrum of **3a** ( $CDCl_3$ ).

HRMS20I16OCT14 #34 RT: 0.29 AV: 1 SB: 6 0.02-0.07 NL: 1.57E6  
T: FTMS + p ESI Full ms [100.00-1000.00]

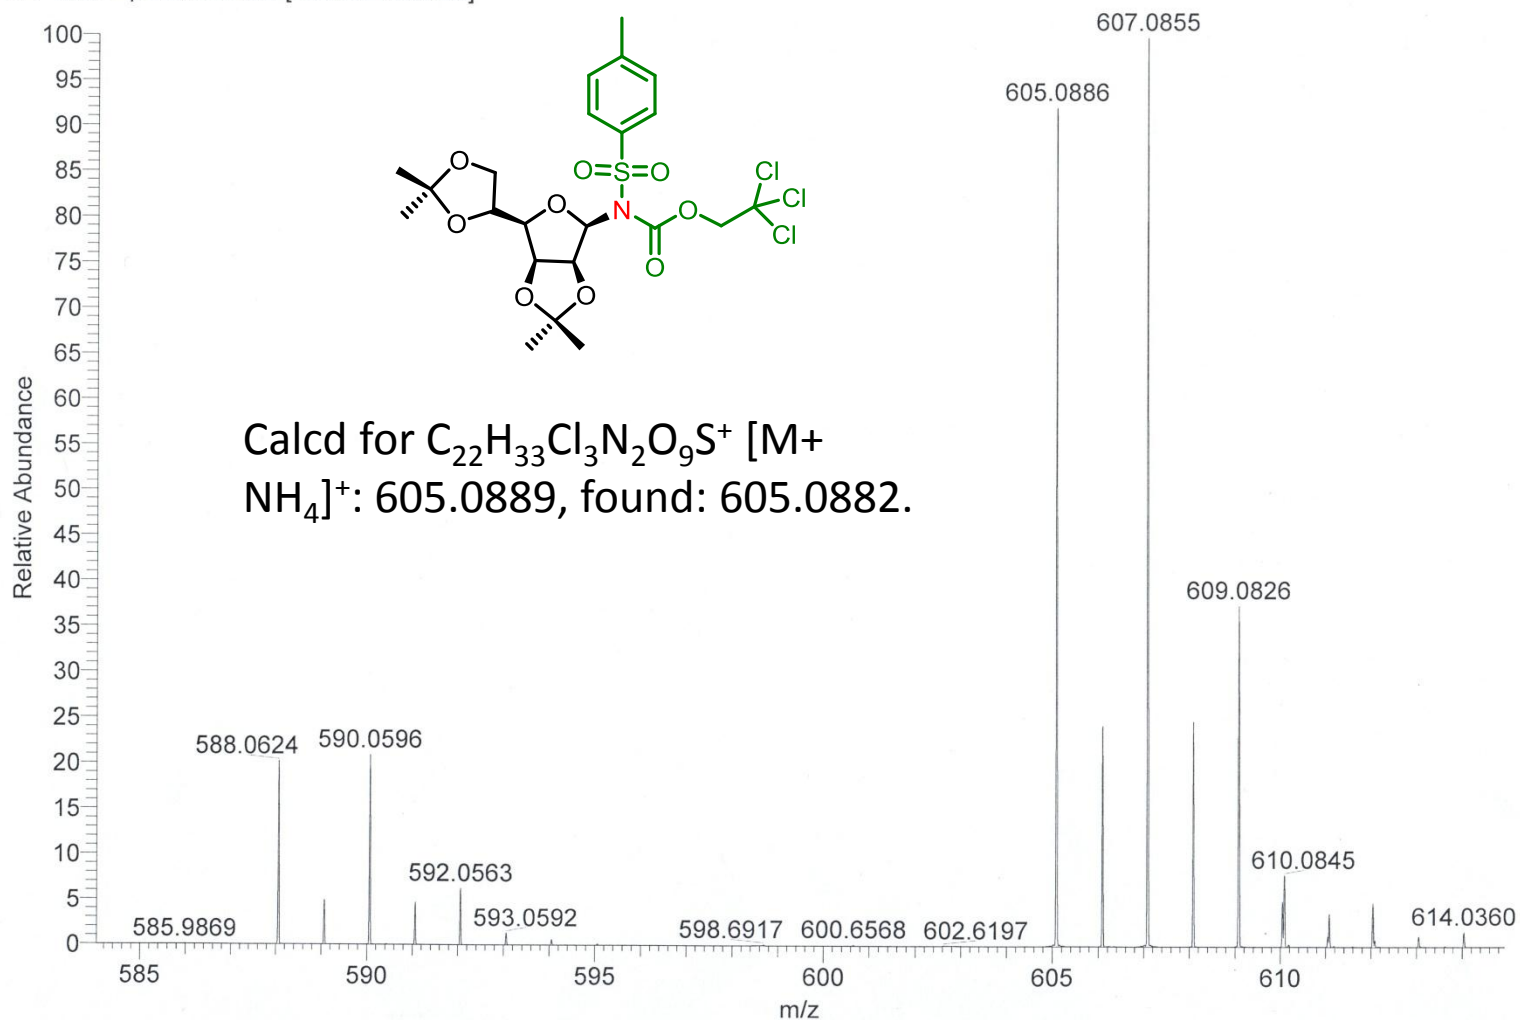

HRMS of **3a**

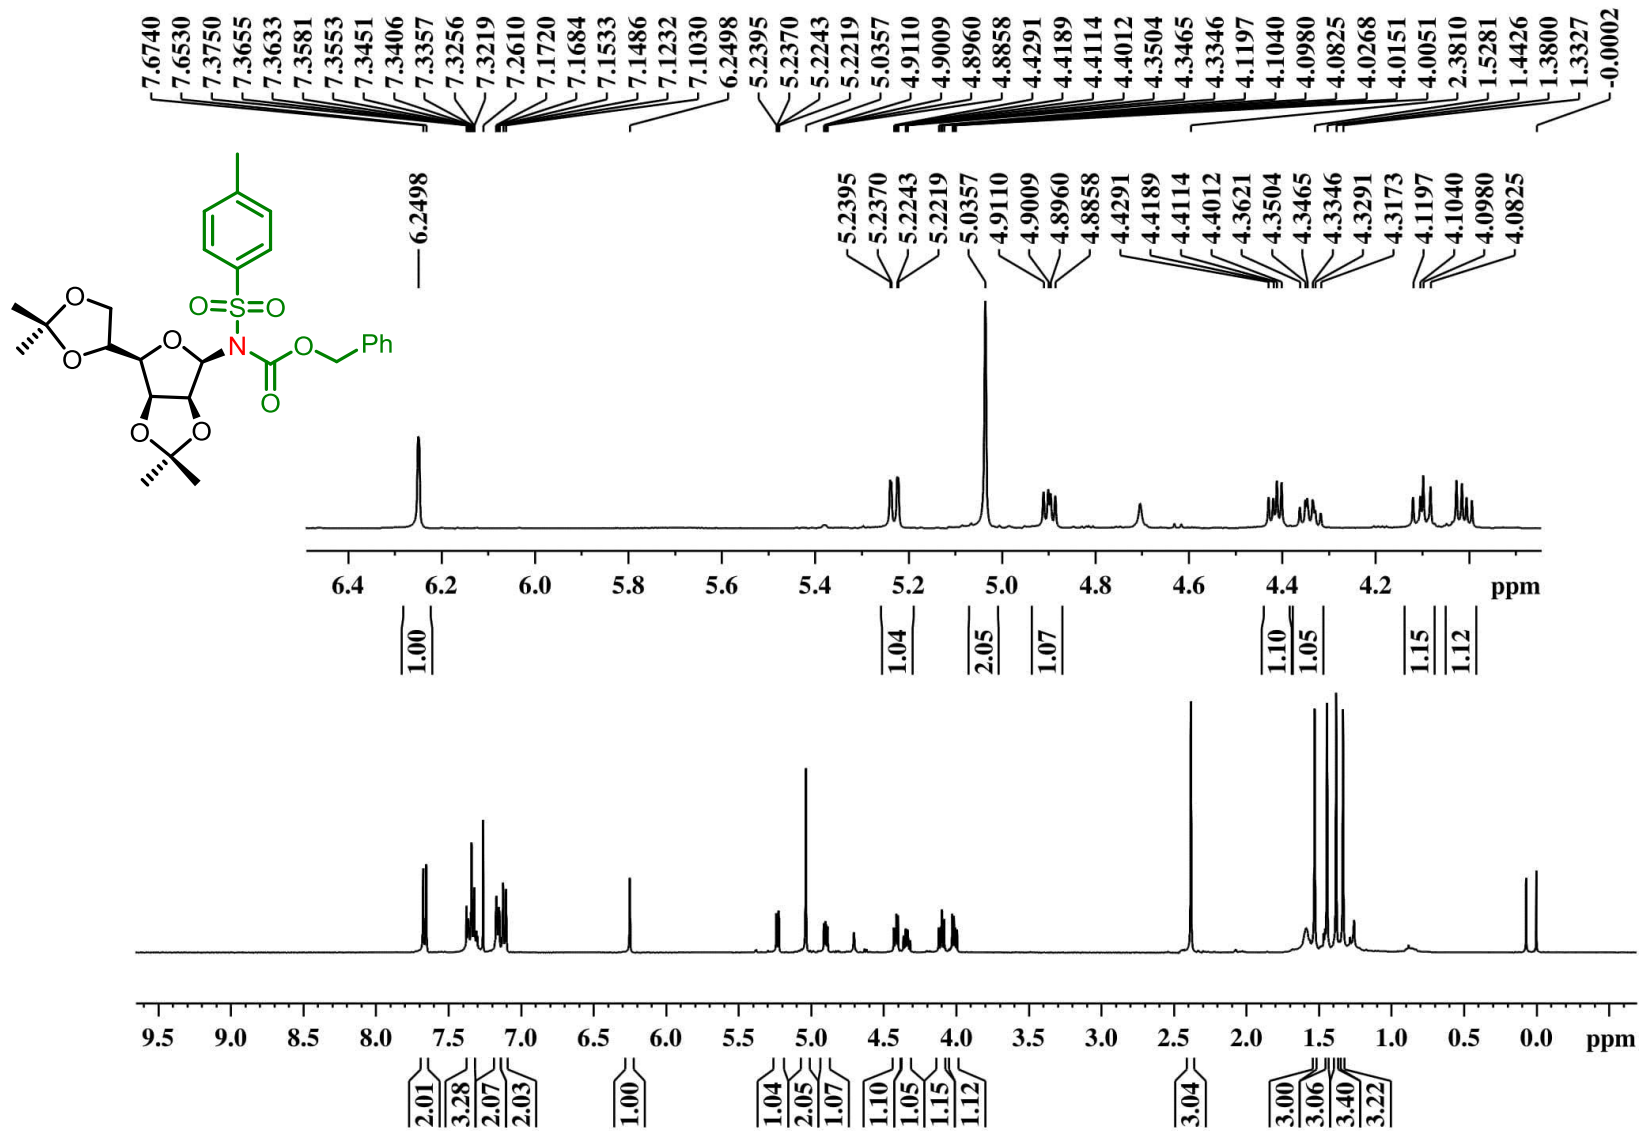

$^1\text{H}$  NMR spectrum of **3b** (400 MHz,  $\text{CDCl}_3$ )

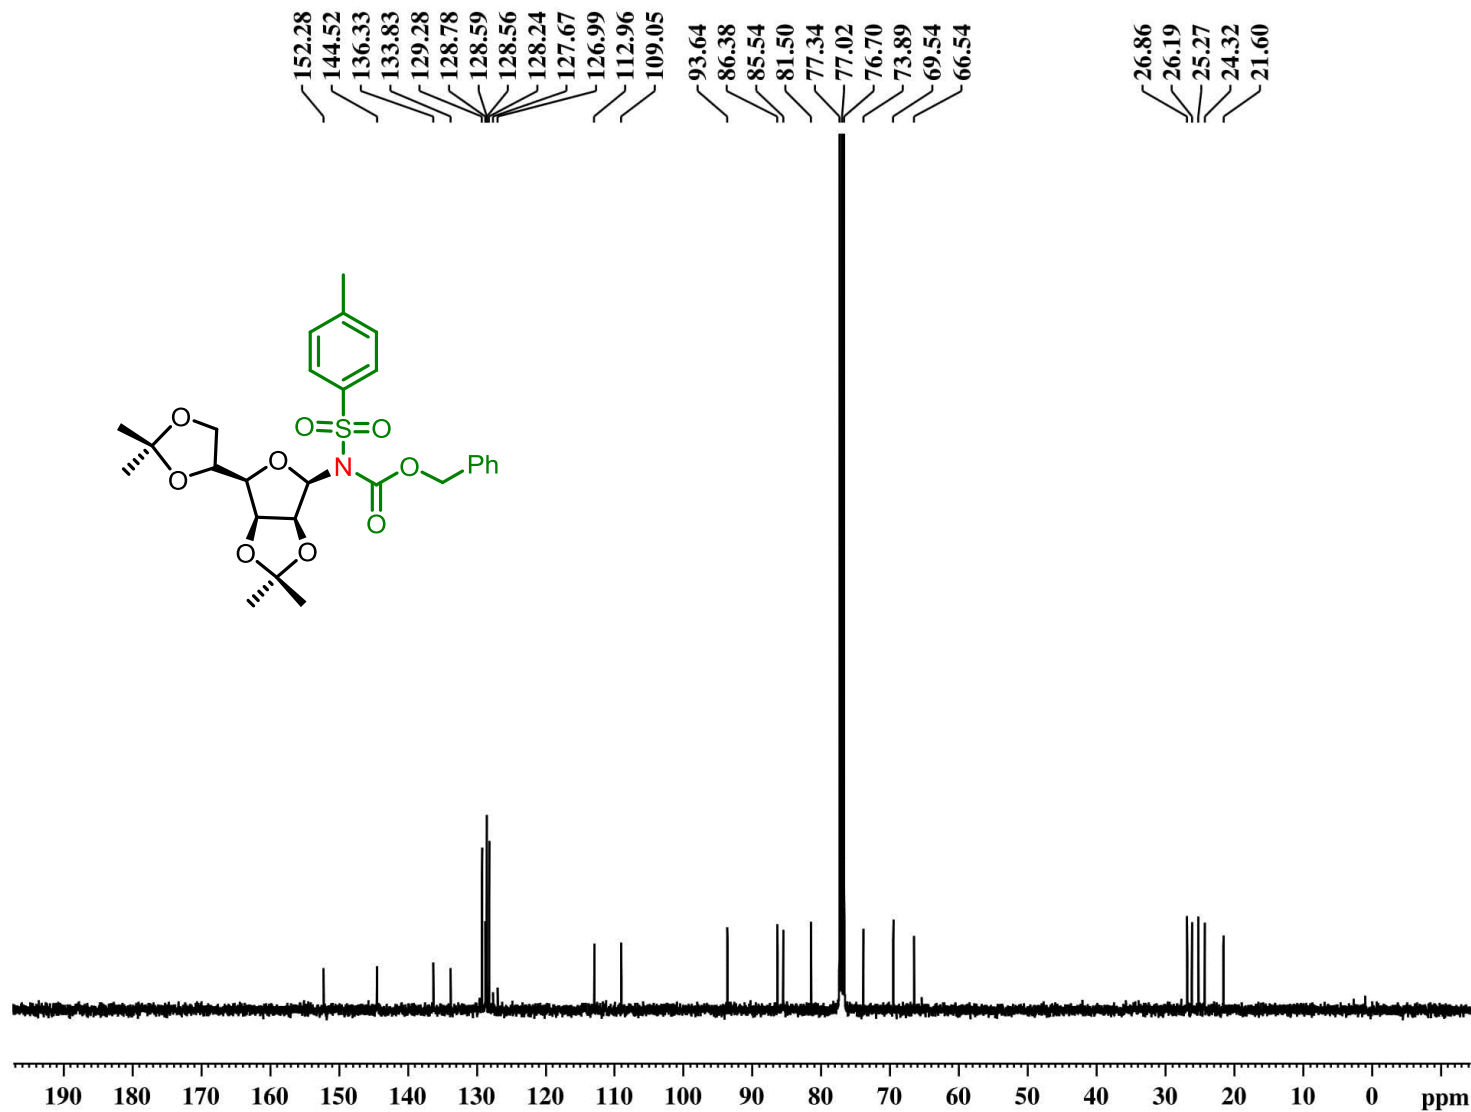

<sup>13</sup>C NMR spectrum of **3b** (100 MHz, MHz, CDCl<sub>3</sub>)

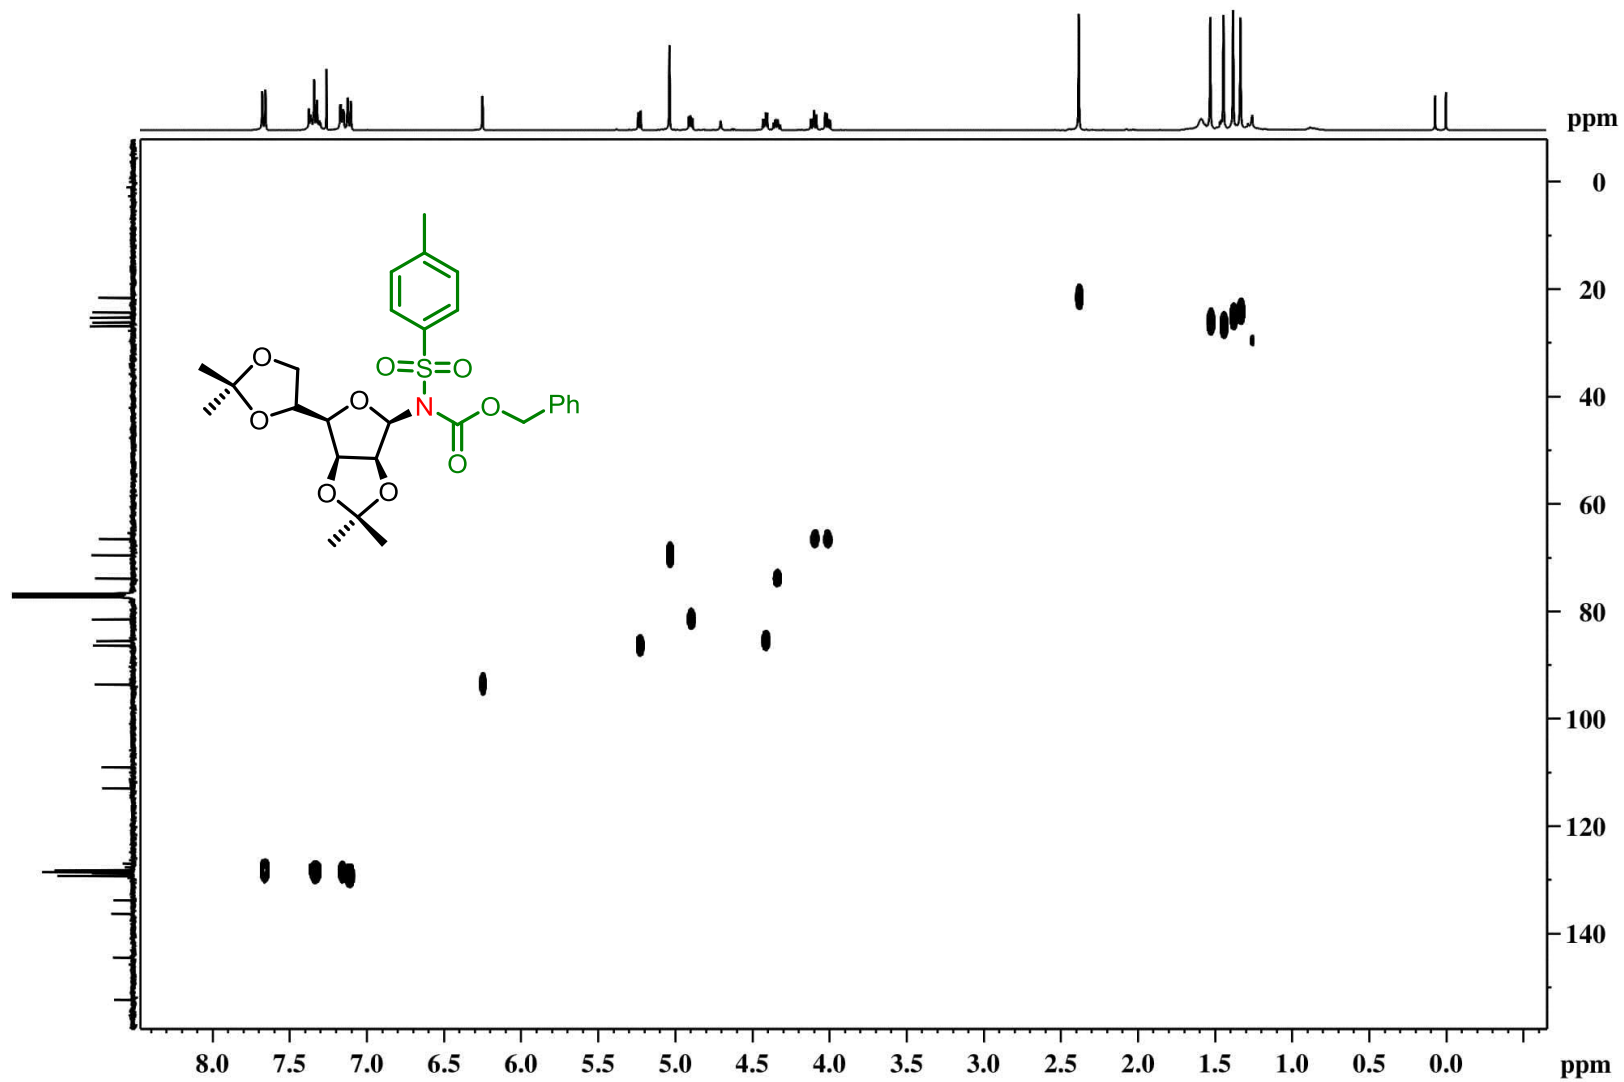

2D HSQC spectrum of **3b** ( $\text{CDCl}_3$ ).

## SAIF [HRMS Report]

|                   |                      |                       |                                  |
|-------------------|----------------------|-----------------------|----------------------------------|
| Data File:        | HRMS20I01OCT01       | Original Data Path:   | D:\INTERNAL NEW\2020\OCT<br>2020 |
| Sample ID:        | PKM-TMb-02           | Sample Name:          |                                  |
| Acquisition Date: | 10/01/20 10:49:37 AM | Run Time(min):        | 0.00                             |
| Vial:             | CStk1-01:01          | Injection Volume(ul): | 1.00                             |

HRMS20I01OCT01 #12-25 RT: 0.11-0.21 AV: 14 SB: 1 0.01 NL: 4.11E6  
T: FTMS + p ESI Full ms [100.00-1500.00]

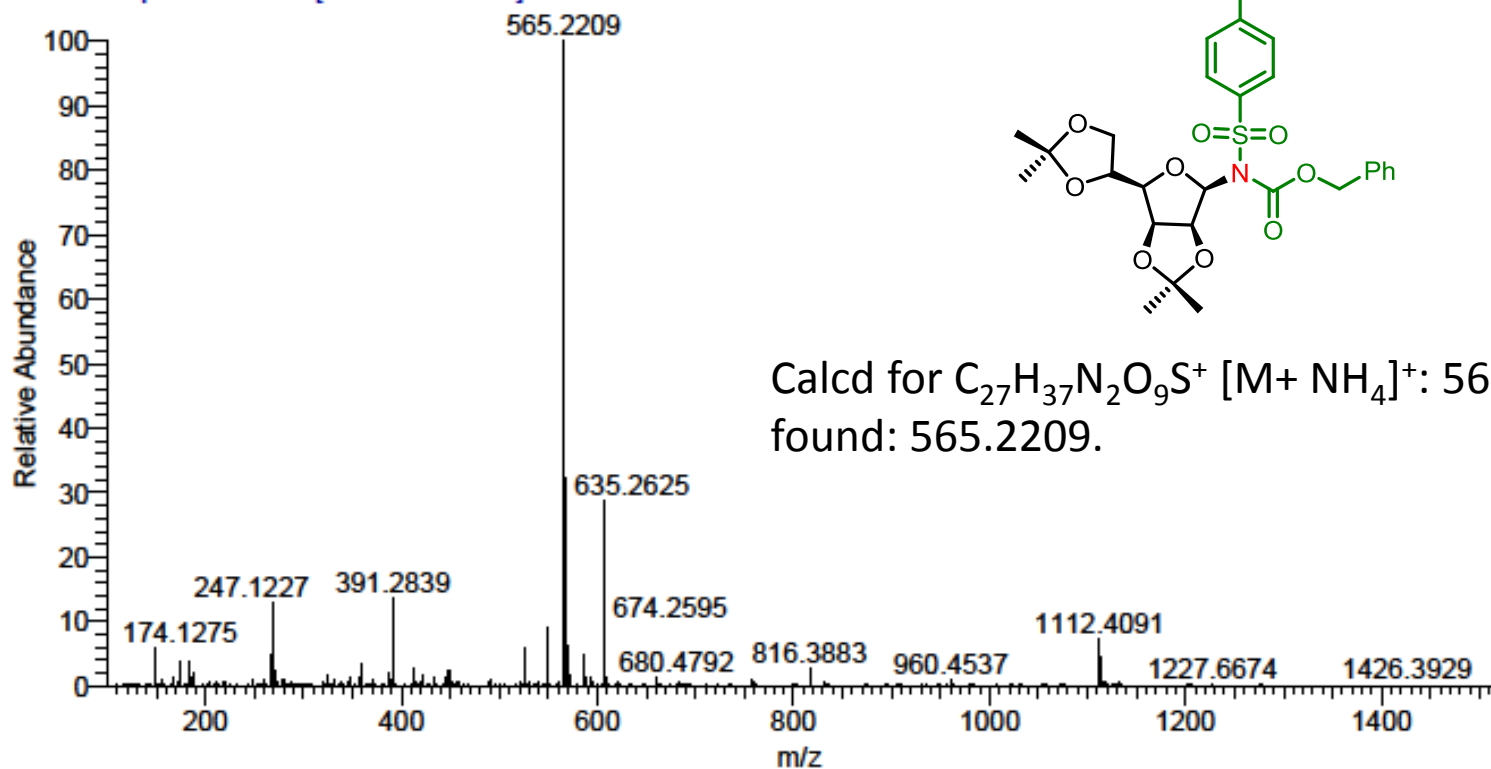

HRMS of **3b**



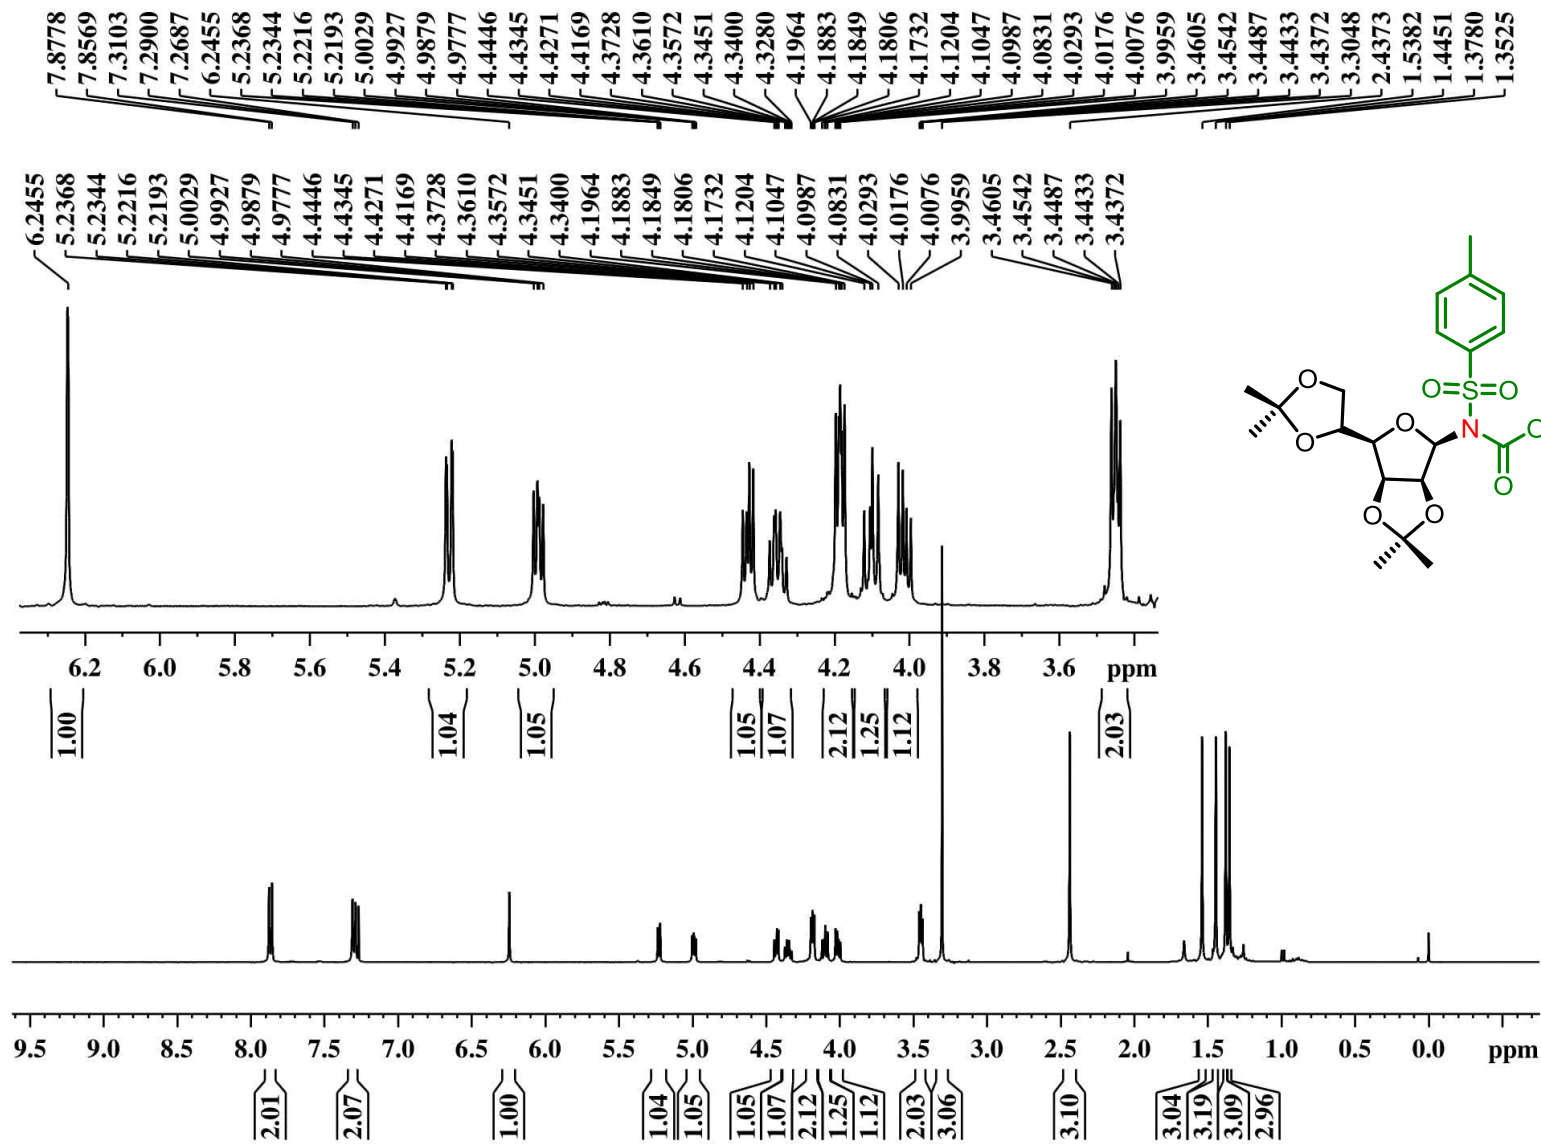

<sup>1</sup>H NMR spectrum of **3c** (400 MHz, CDCl<sub>3</sub>)

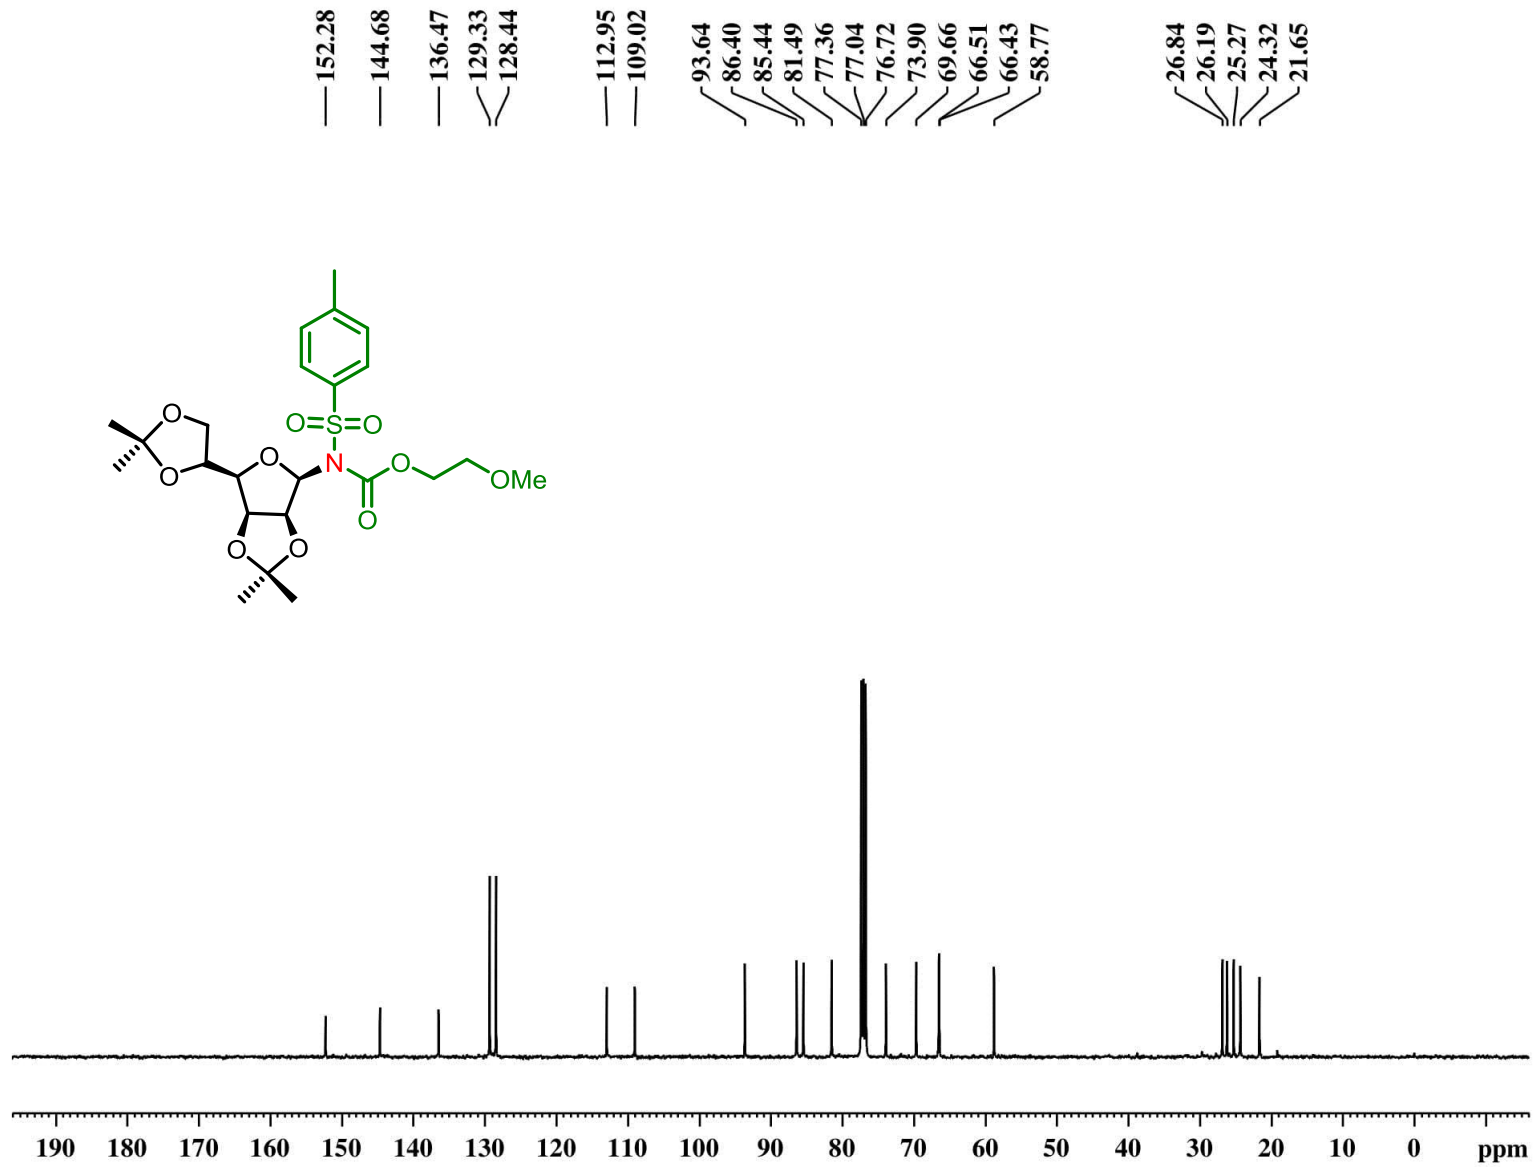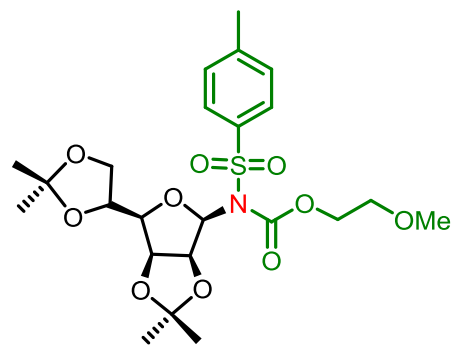

<sup>13</sup>C NMR spectrum of **3c** (100 MHz, MHz, CDCl<sub>3</sub>)

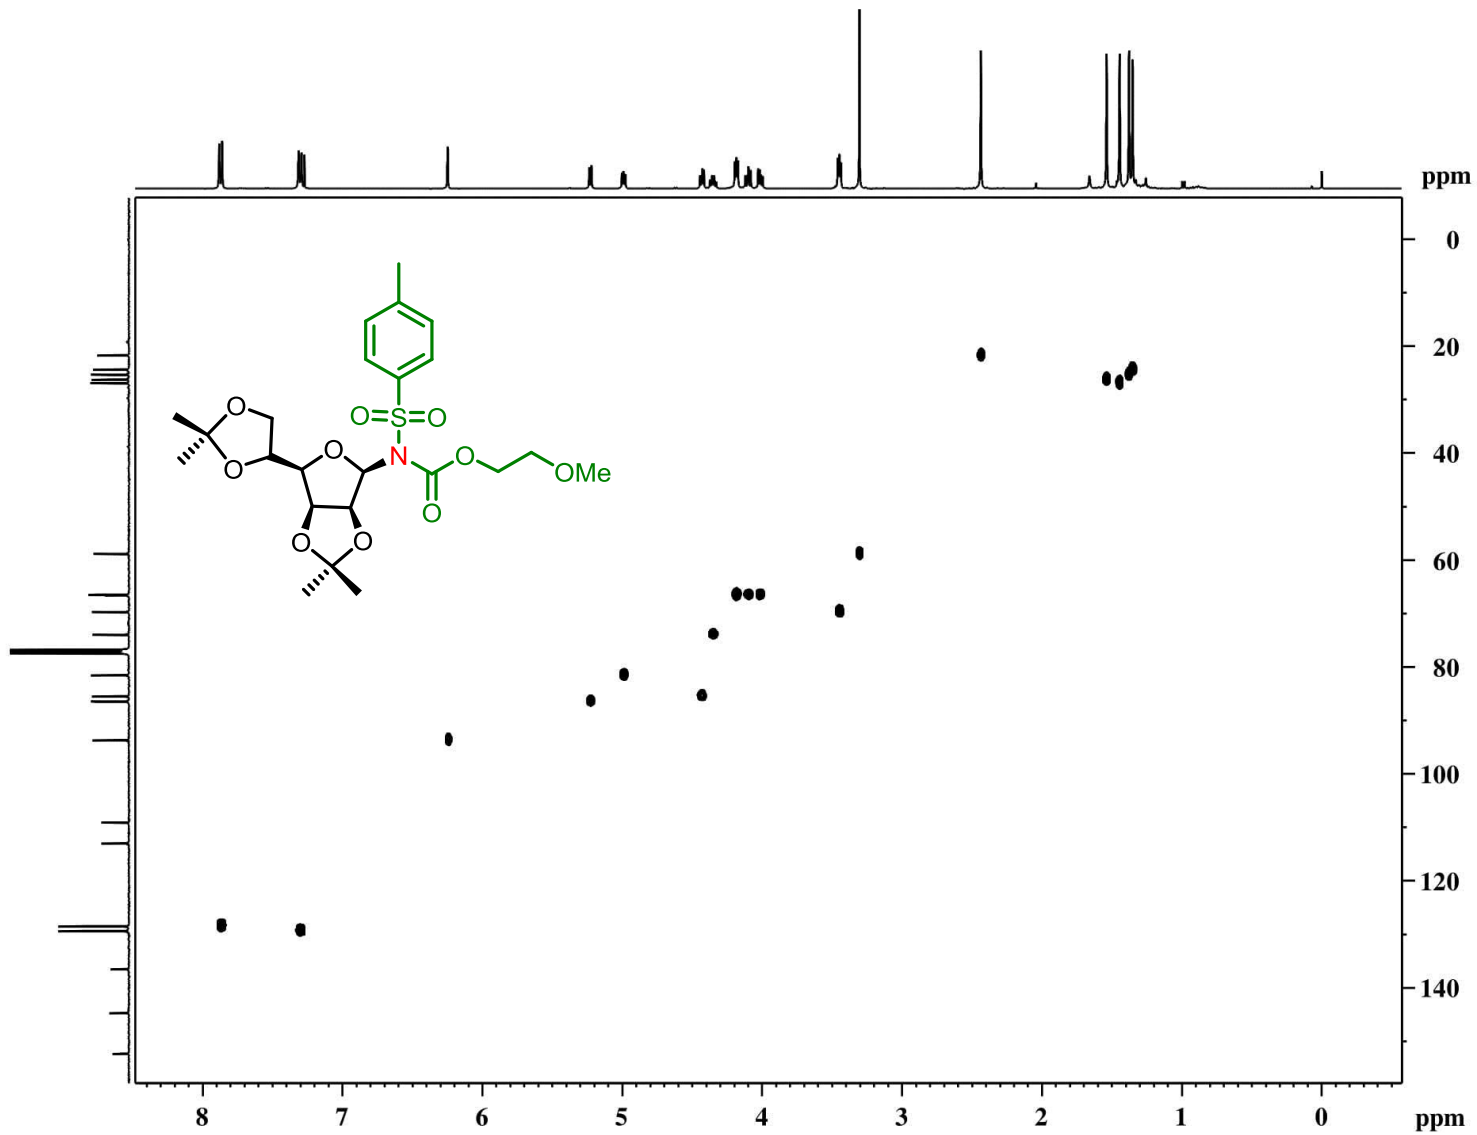

2D HSQC spectrum of **3c** (CDCl<sub>3</sub>).

HRMS20117FEB12\_200217165651 #19-28 RT: 0.14-0.21 AV: 10 SB: 7 0.02-0.07 NL: 2.50E4  
T: FTMS + p ESI Full ms [100.00-1500.00]

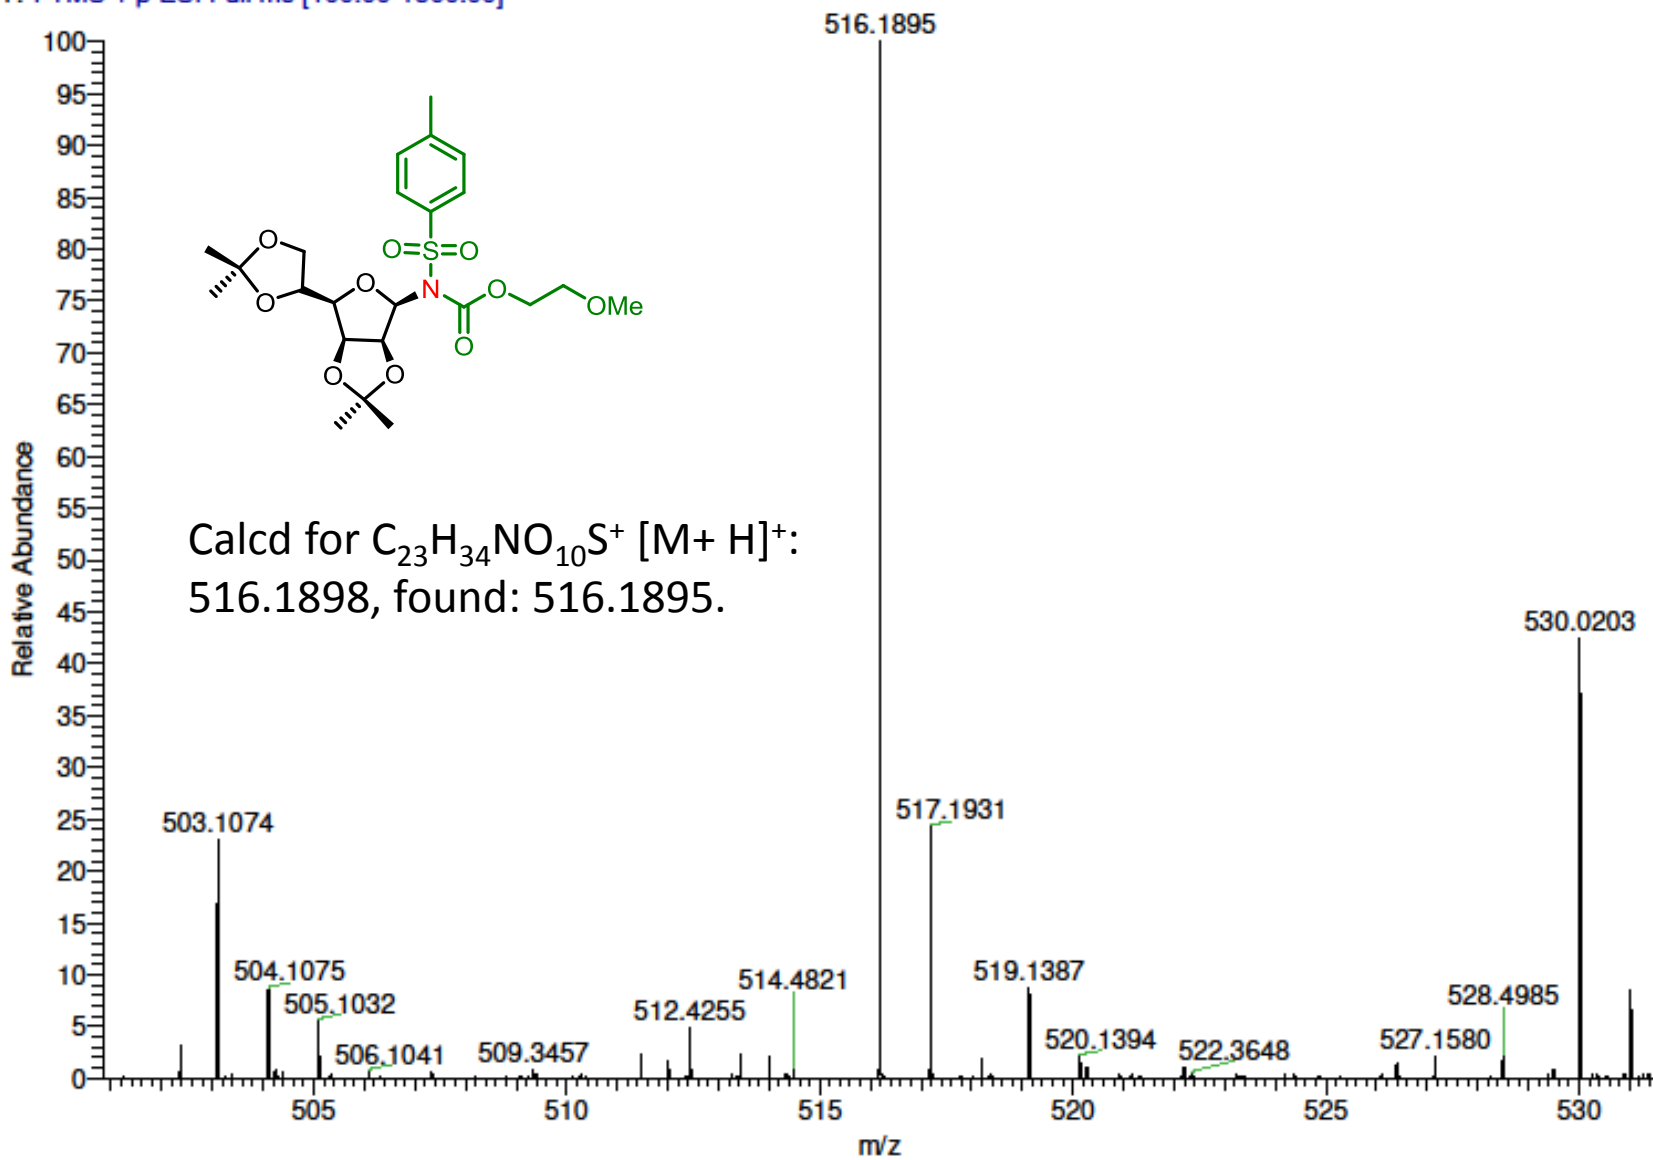

HRMS of 3c

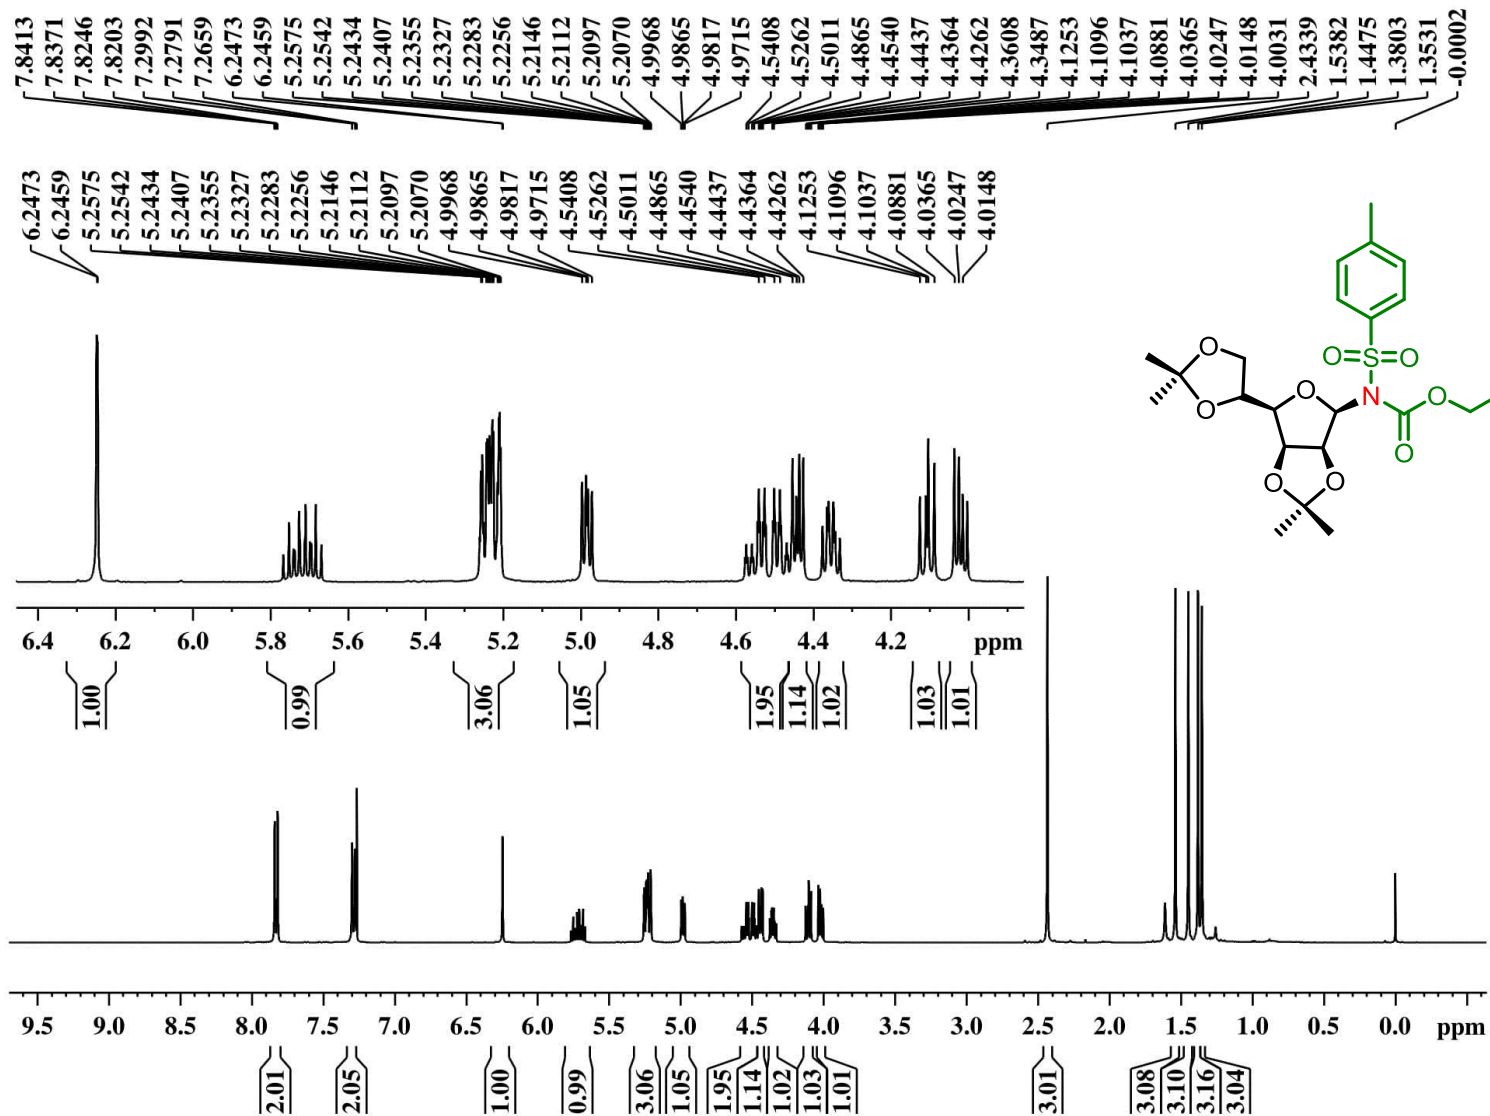

<sup>1</sup>H NMR spectrum of **3d** (400 MHz, CDCl<sub>3</sub>)



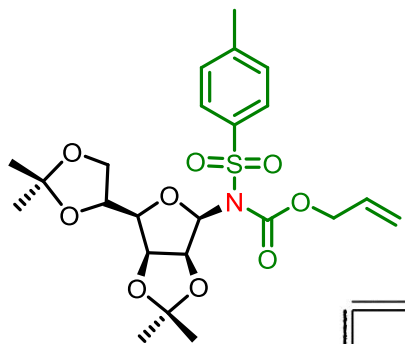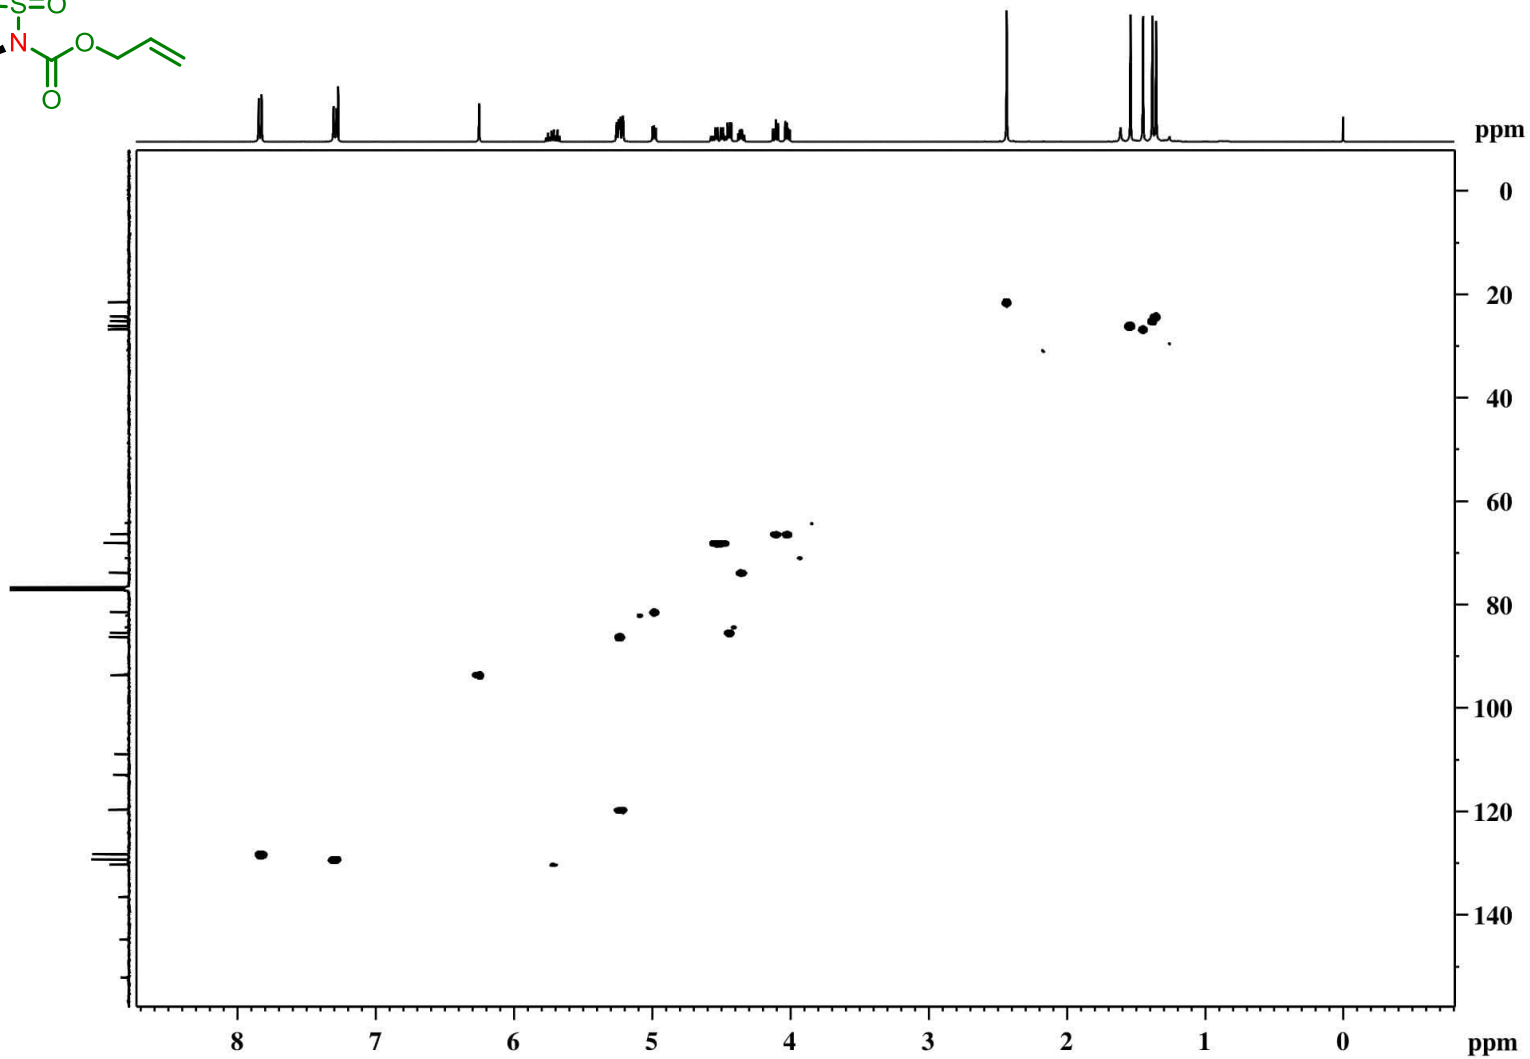

2D HSQC spectrum of **3d** ( $\text{CDCl}_3$ ).

## SAIF [HRMS Report]

|                   |                      |                       |                                  |
|-------------------|----------------------|-----------------------|----------------------------------|
| Data File:        | HRMS20I01OCT04       | Original Data Path:   | D:\INTERNAL NEW\2020\OCT<br>2020 |
| Sample ID:        | PKM-TMA-01           | Sample Name:          |                                  |
| Acquisition Date: | 10/01/20 10:55:36 AM | Run Time(min):        | 0.00                             |
| Vial:             | CStk1-01:4           | Injection Volume(μl): | 1.00                             |

HRMS20I01OCT04 #12-25 RT: 0.11-0.21 AV: 14 SB: 1 0.01 NL: 1.05E8  
T: FTMS + p ESI Full ms [100.00-1500.00]

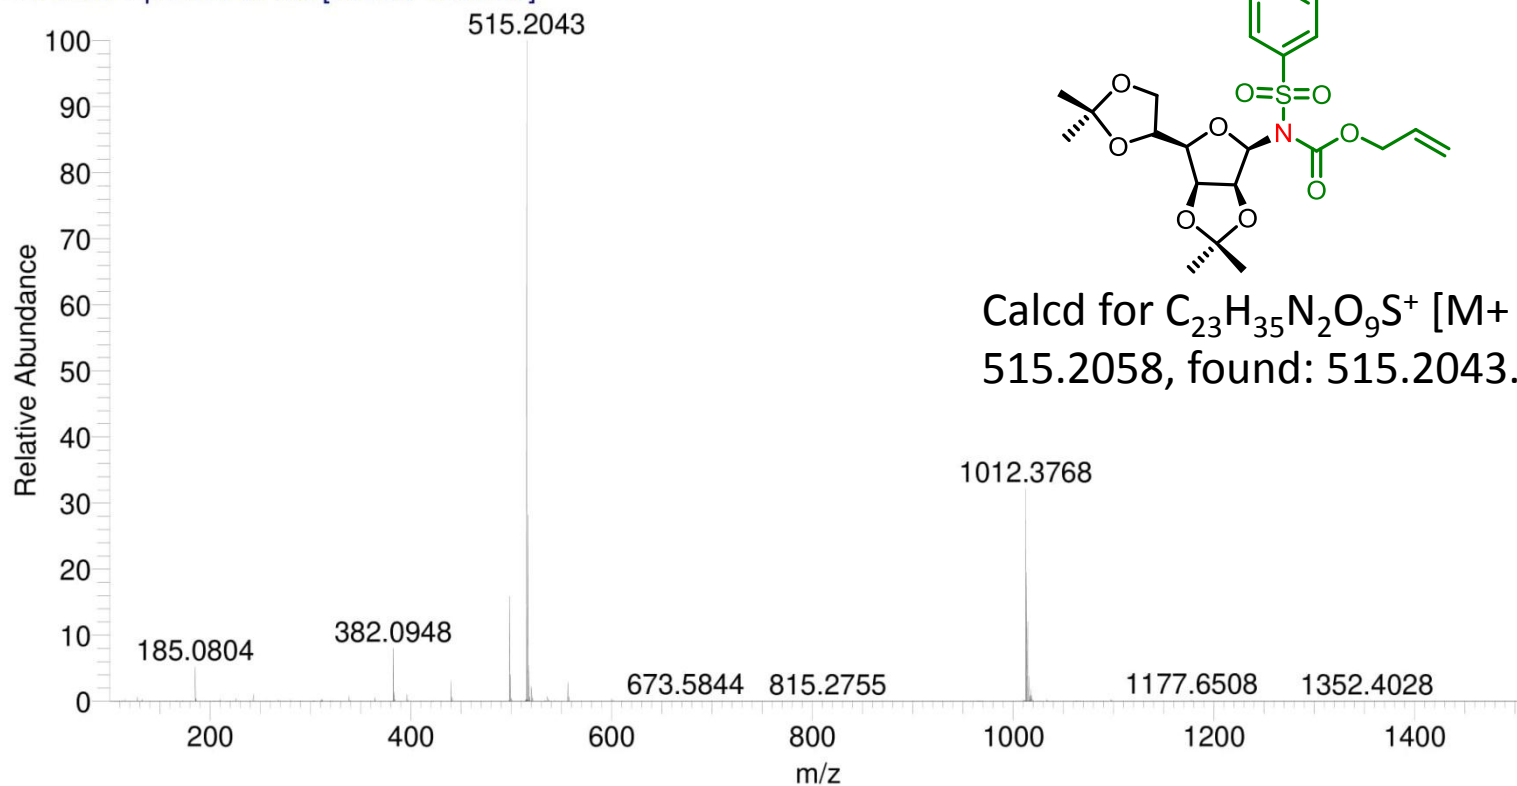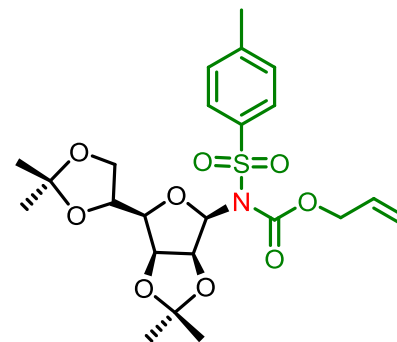

Calcd for  $C_{23}H_{35}N_2O_9S^+ [M+NH_4]^+$ :  
515.2058, found: 515.2043.

HRMS of **3d**





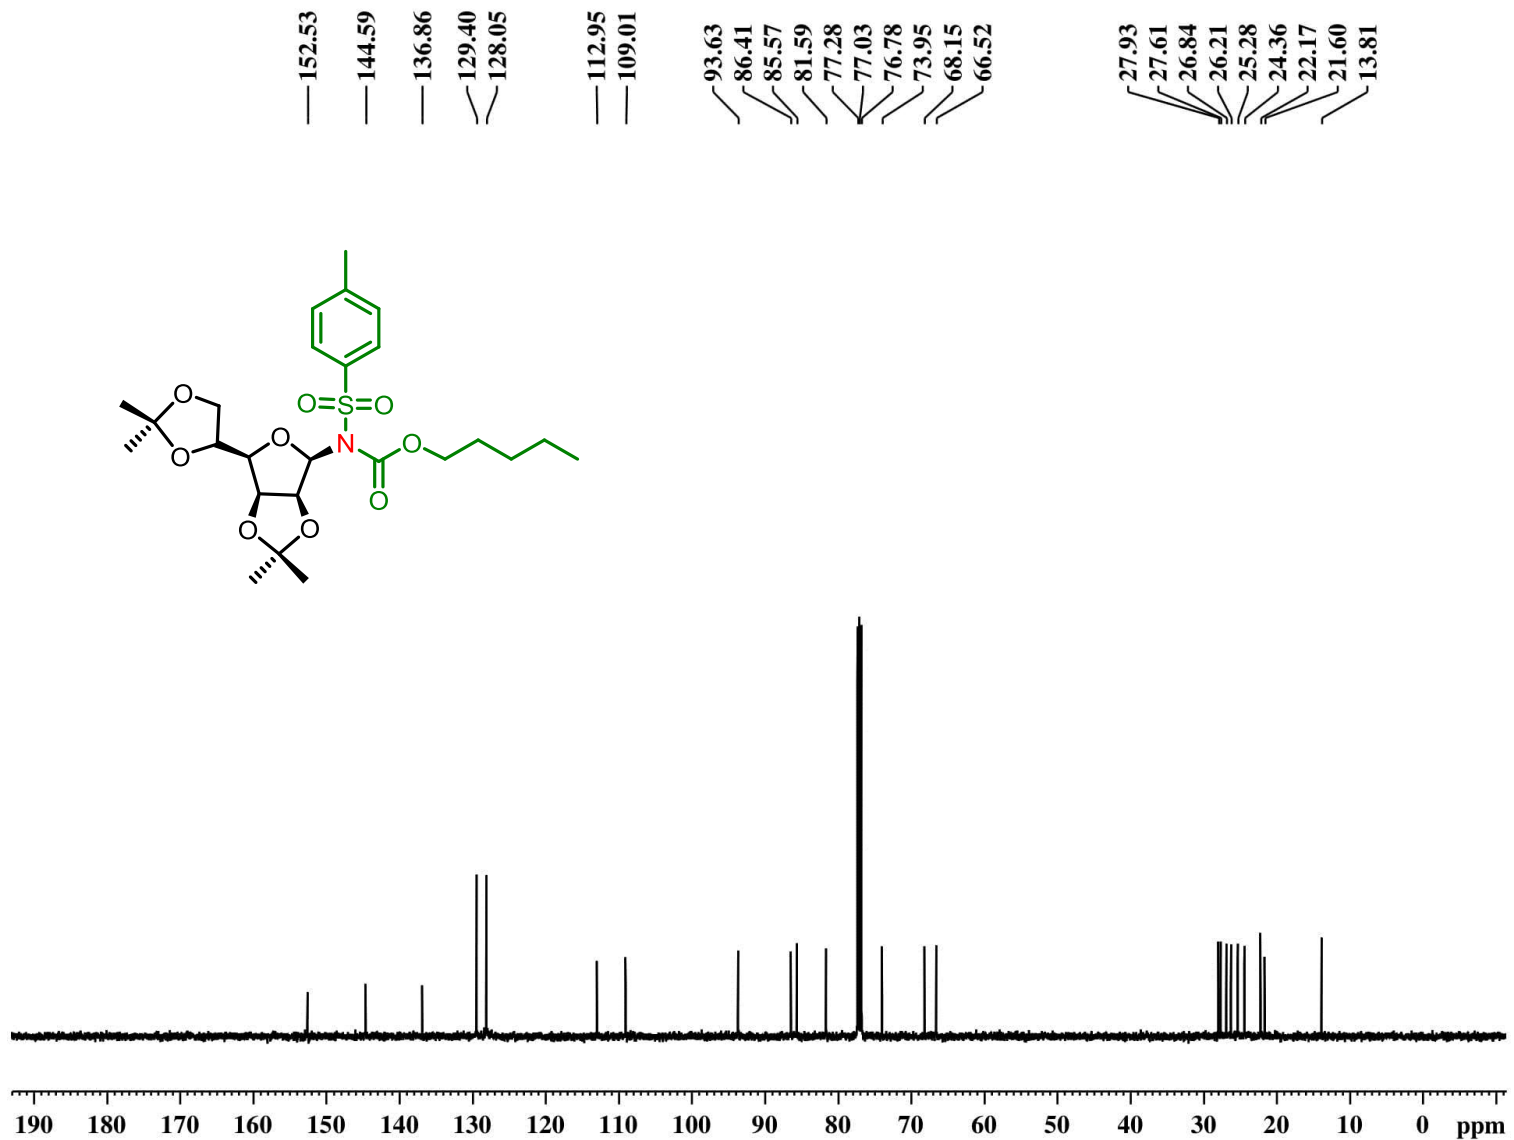

$^{13}\text{C}$  NMR spectrum of **3e** (100 MHz,  $\text{CDCl}_3$ )

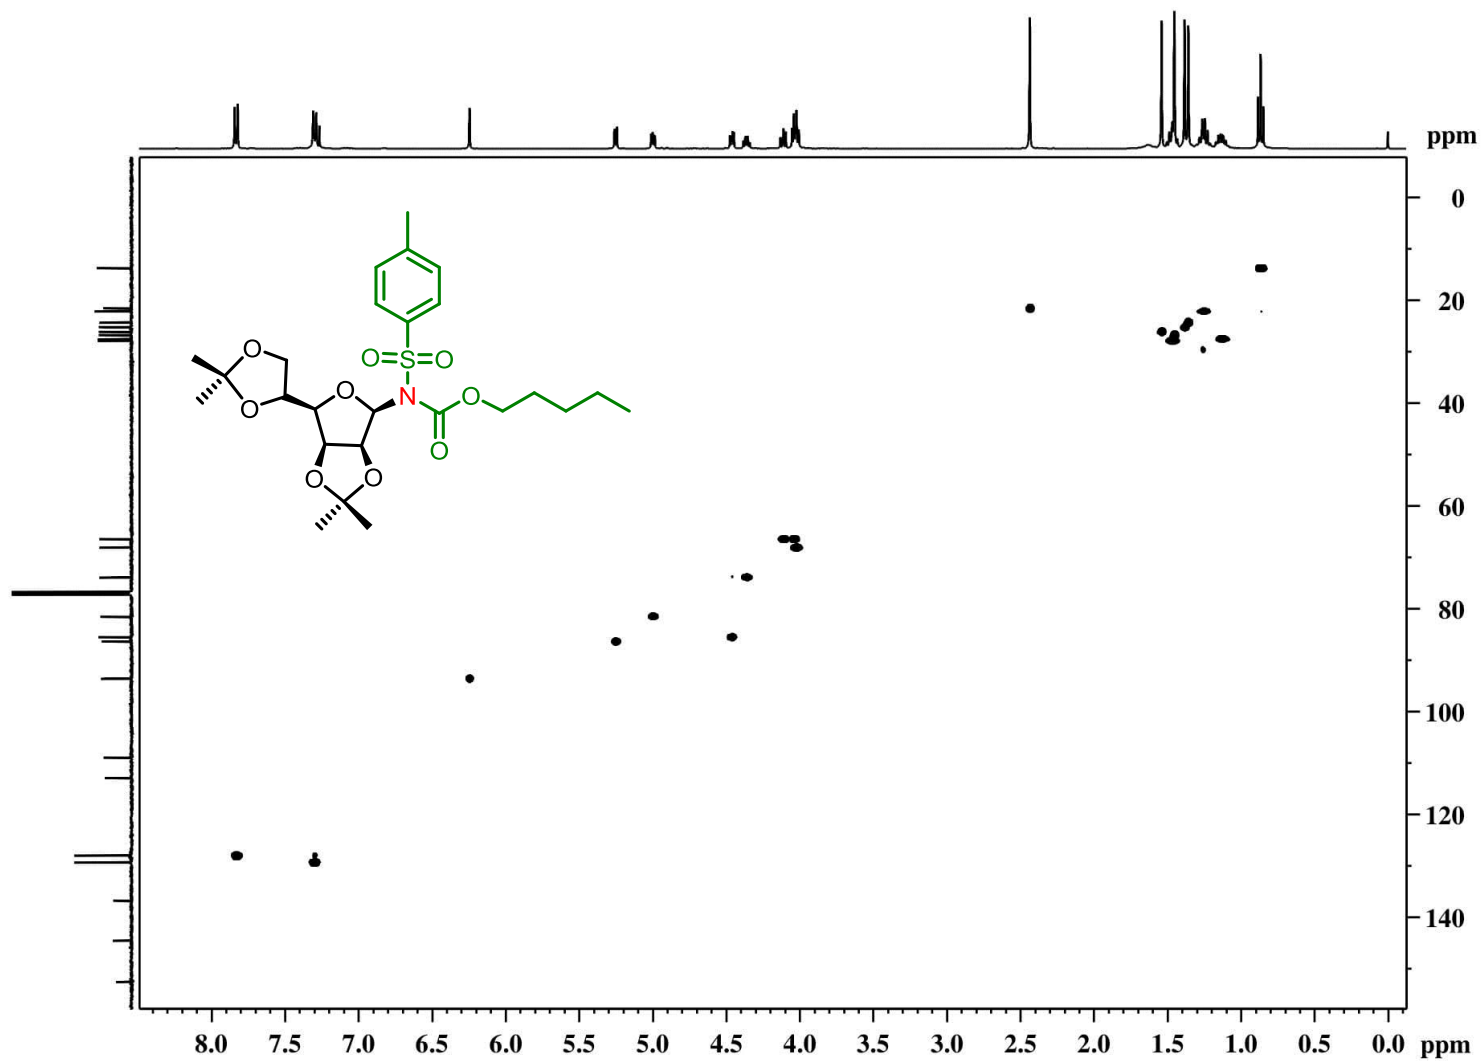

2D HSQC spectrum of **3e** ( $\text{CDCl}_3$ ).

## SAIF [HRMS Report]

Data File: HRMS20101JUN08  
Sample ID: PKM-TMP-01  
Acquisition Date: 06/01/20 12:36:07 PM  
Vial: CStk1-01:8

Original Data Path: D:\INTERNALS\2020\May 2020  
Sample Name:  
Run Time(min): 0.00  
Injection Volume(ul): 1.00

HRMS20101JUN08 #13-27 RT: 0.11-0.21 AV: 15 SB: 1 0.01 NL: 3.43E7  
T: FTMS + p ESI Full ms [100.00-1000.00]

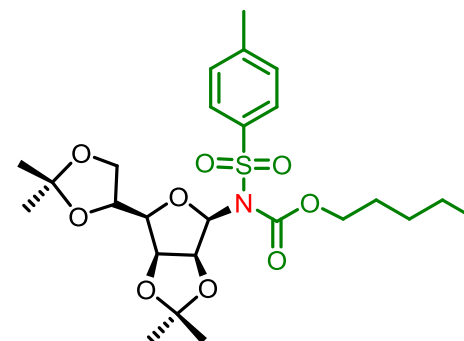

Calcd for  $C_{25}H_{41}N_2O_9S^+ [M+NH_4]^+$ :  
545.2527, found: 545.2514.

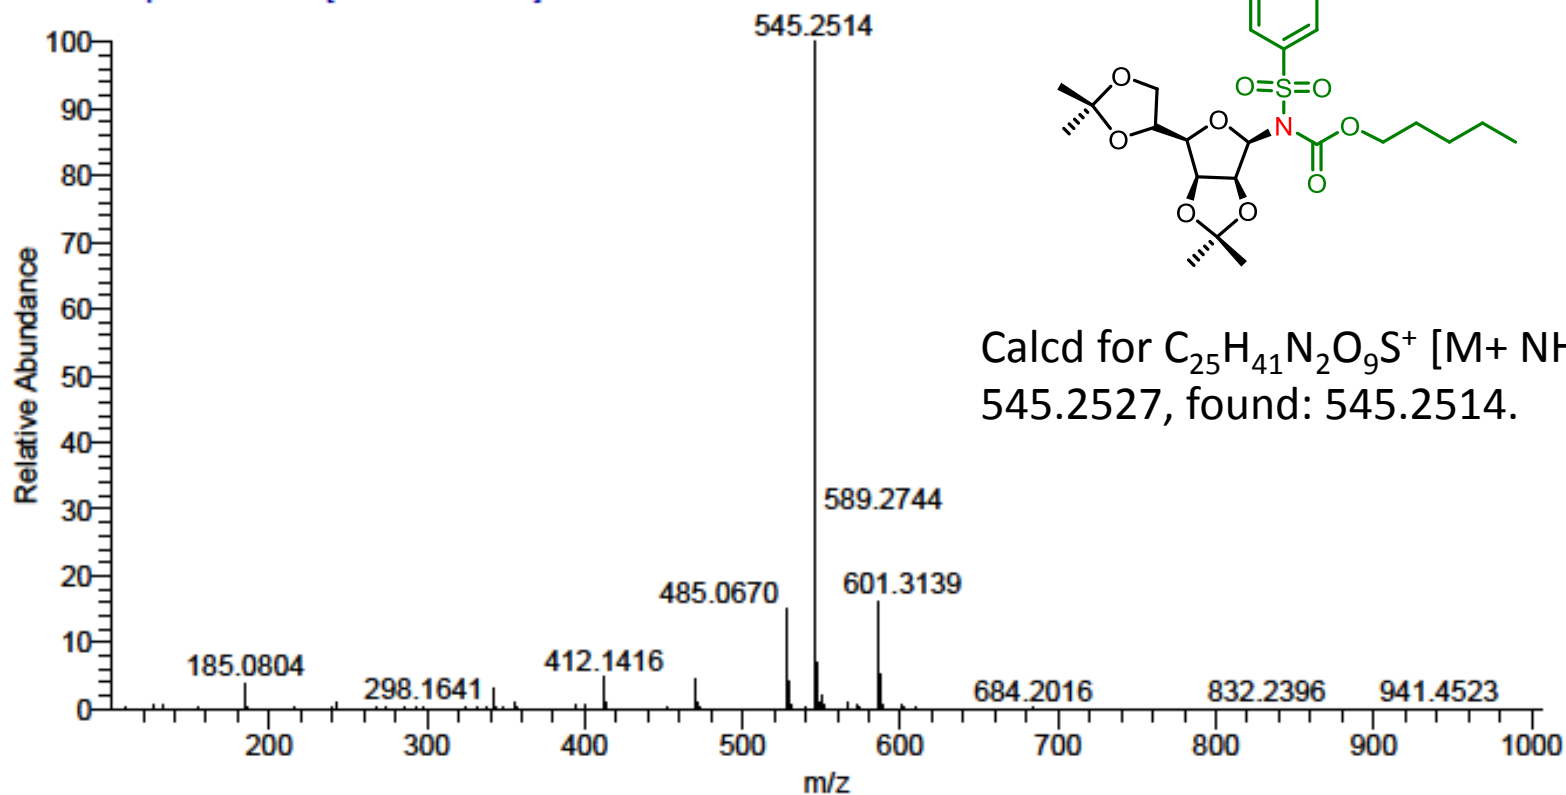

HRMS of **3e**

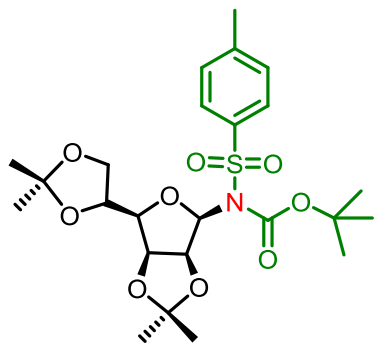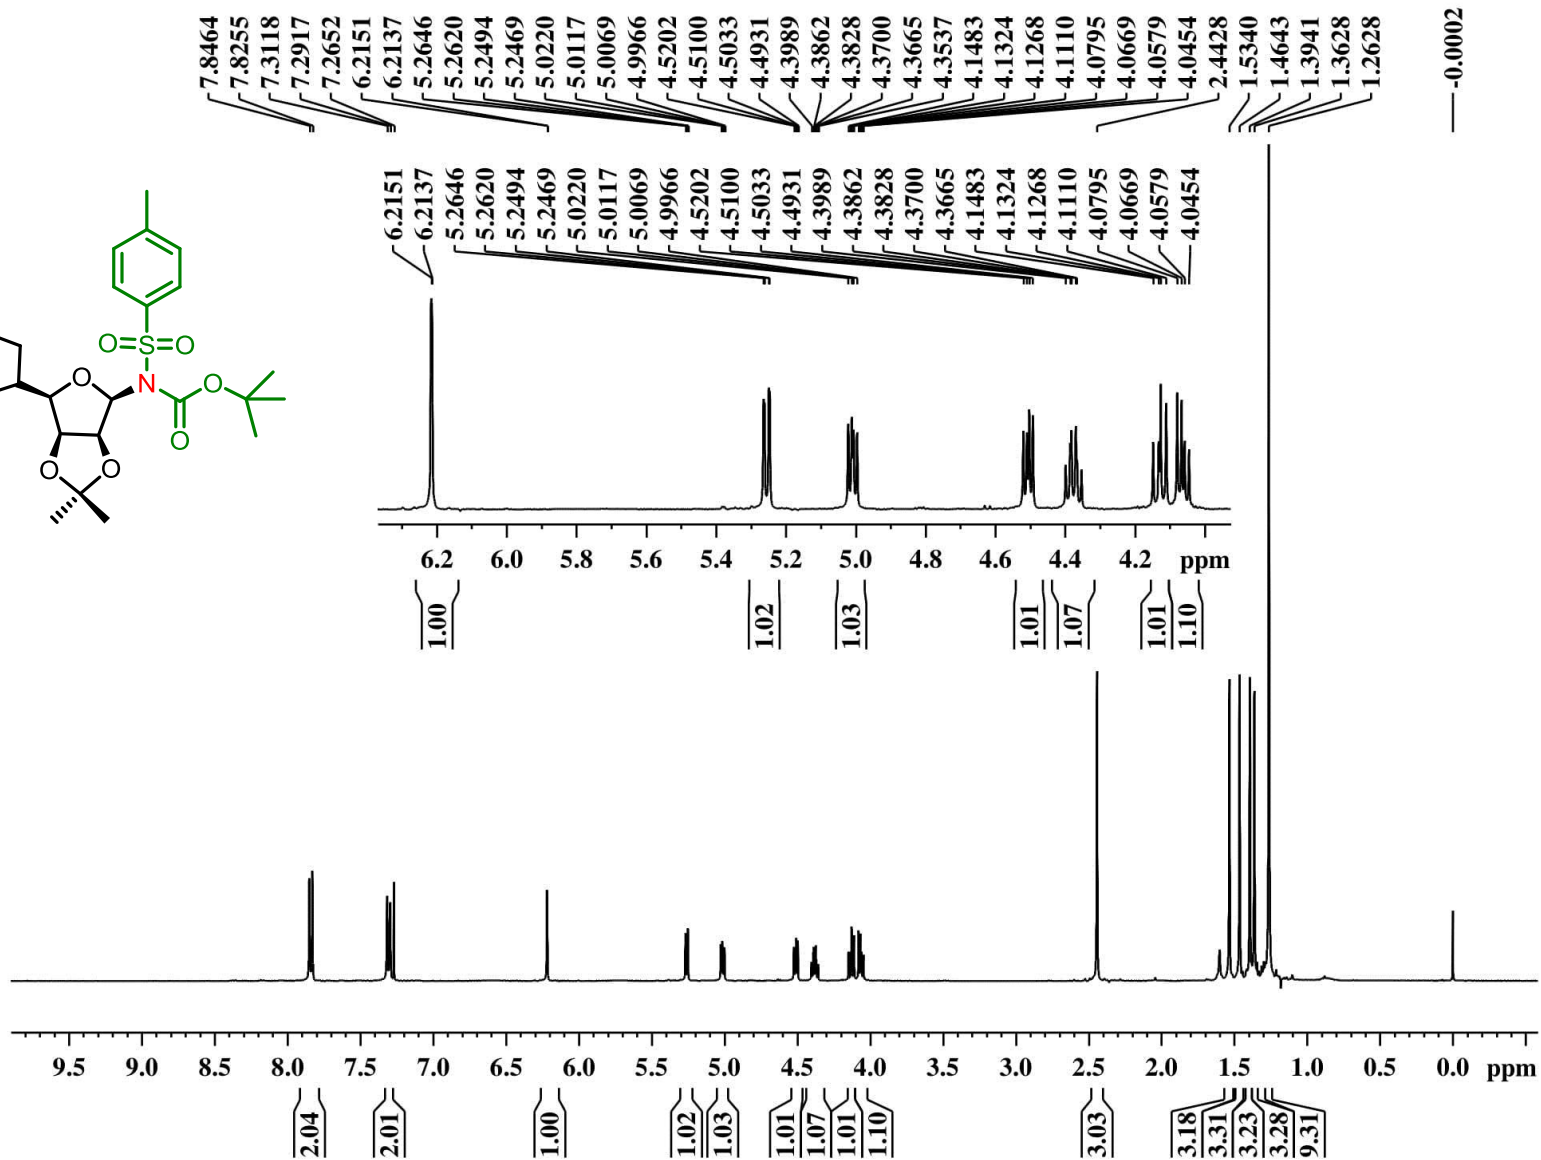

$^1\text{H}$  NMR spectrum of **3f** (400 MHz,  $\text{CDCl}_3$ )

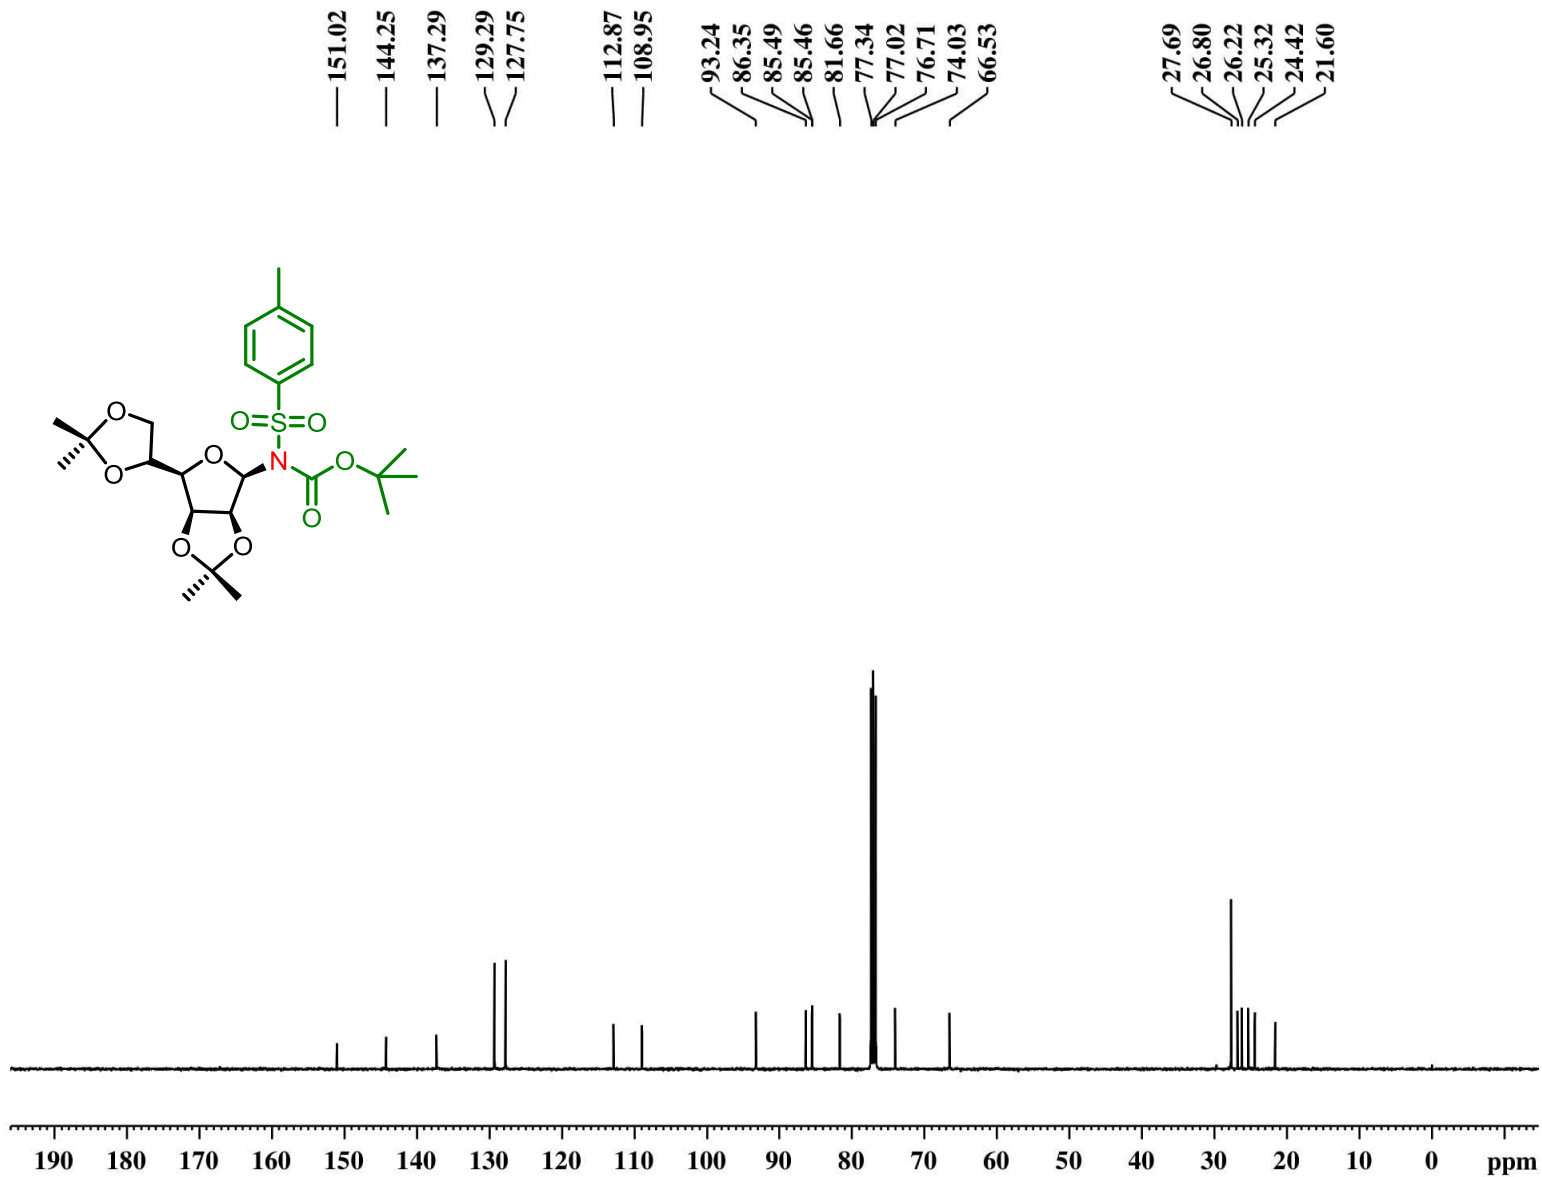

<sup>13</sup>C NMR spectrum of **3f** (100 MHz, MHz, CDCl<sub>3</sub>)

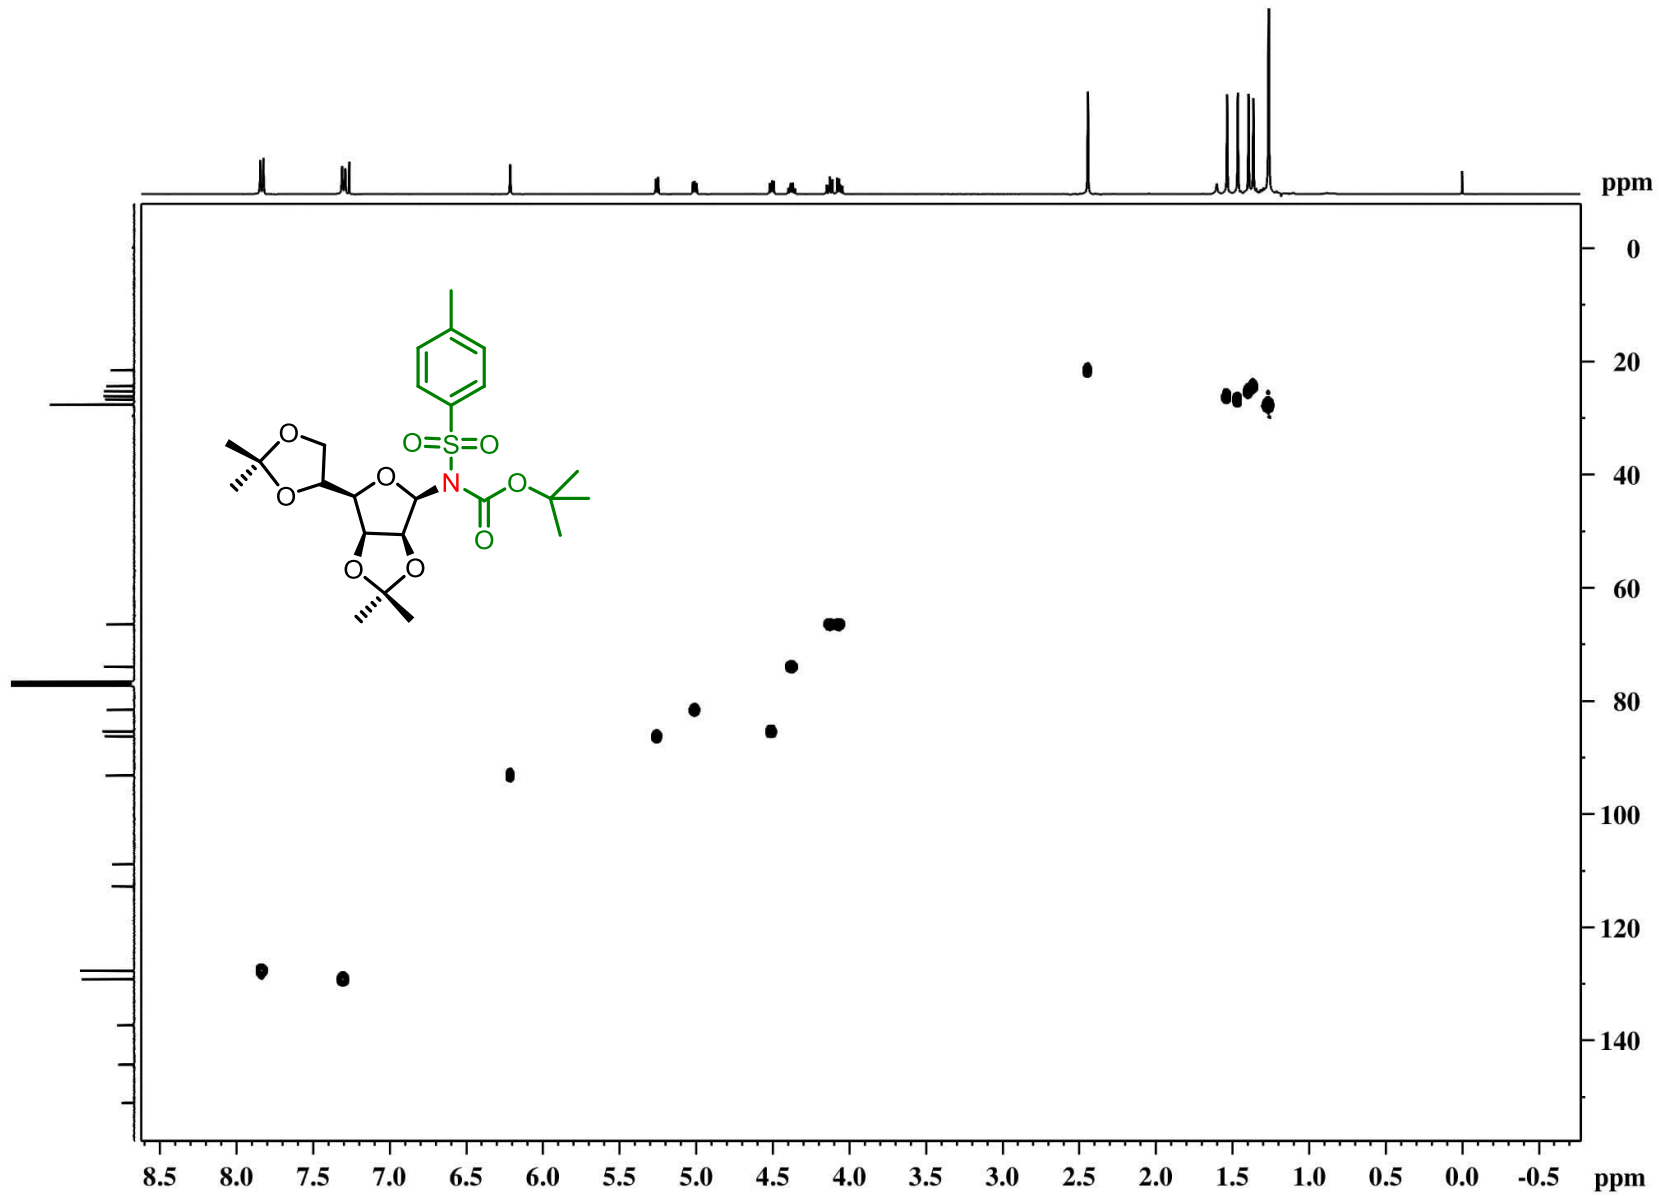

2D HSQC spectrum of **3f** (CDCl<sub>3</sub>).

## SAIF [HRMS Report]

|                   |                      |                       |                                  |
|-------------------|----------------------|-----------------------|----------------------------------|
| Data File:        | HRMS21I06JAN06       | Original Data Path:   | D:\INTERNAL NEW\2021\Jan<br>2021 |
| Sample ID:        | PKM-TMB-01           | Sample Name:          |                                  |
| Acquisition Date: | 01/06/21 11:43:10 AM | Run Time(min):        | 0.00                             |
| Vial:             | CStk1-01:6           | Injection Volume(μl): | 1.00                             |

HRMS21I06JAN06 #29-61 RT: 0.25-0.50 AV: 33 SB: 1 0.00 NL: 1.70E6  
T: FTMS + p ESI Full ms [150.00-1000.00]

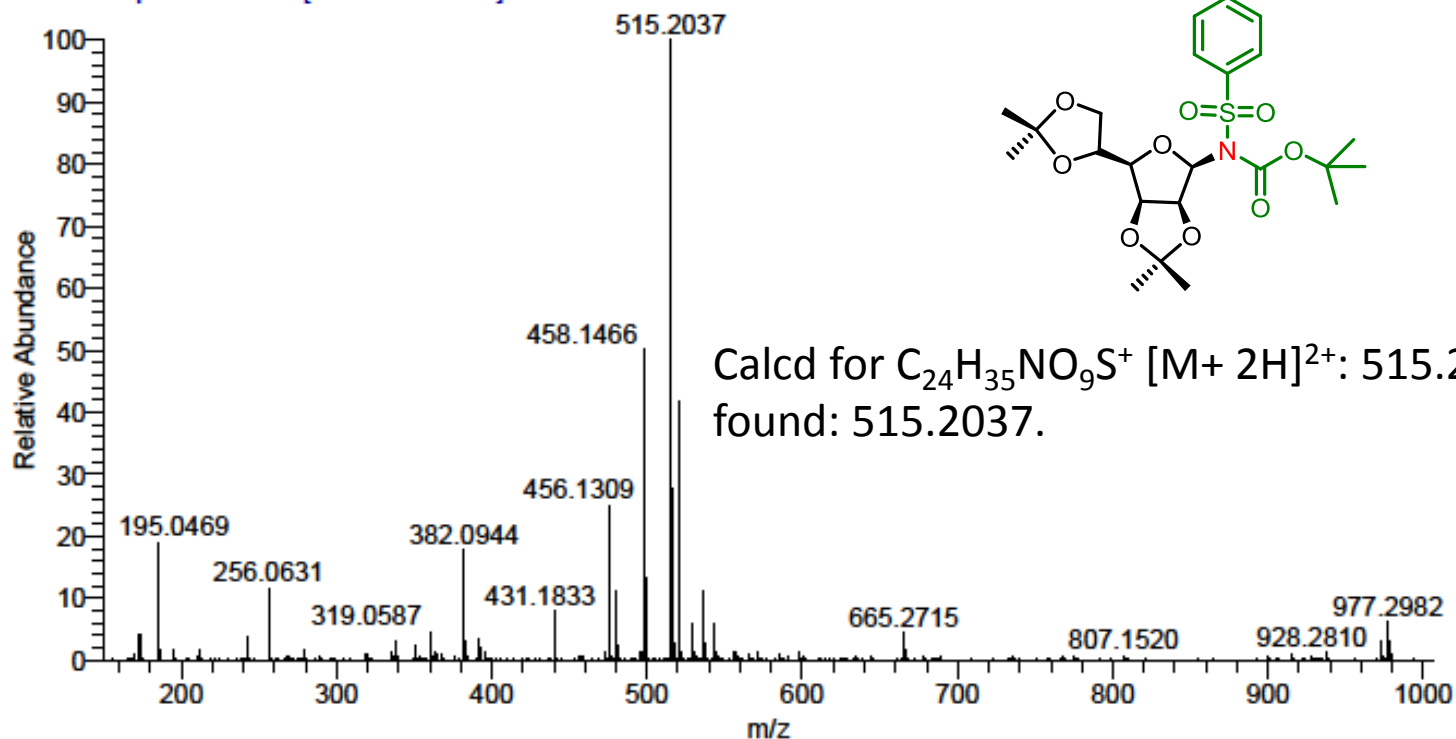

HRMS of **3f**



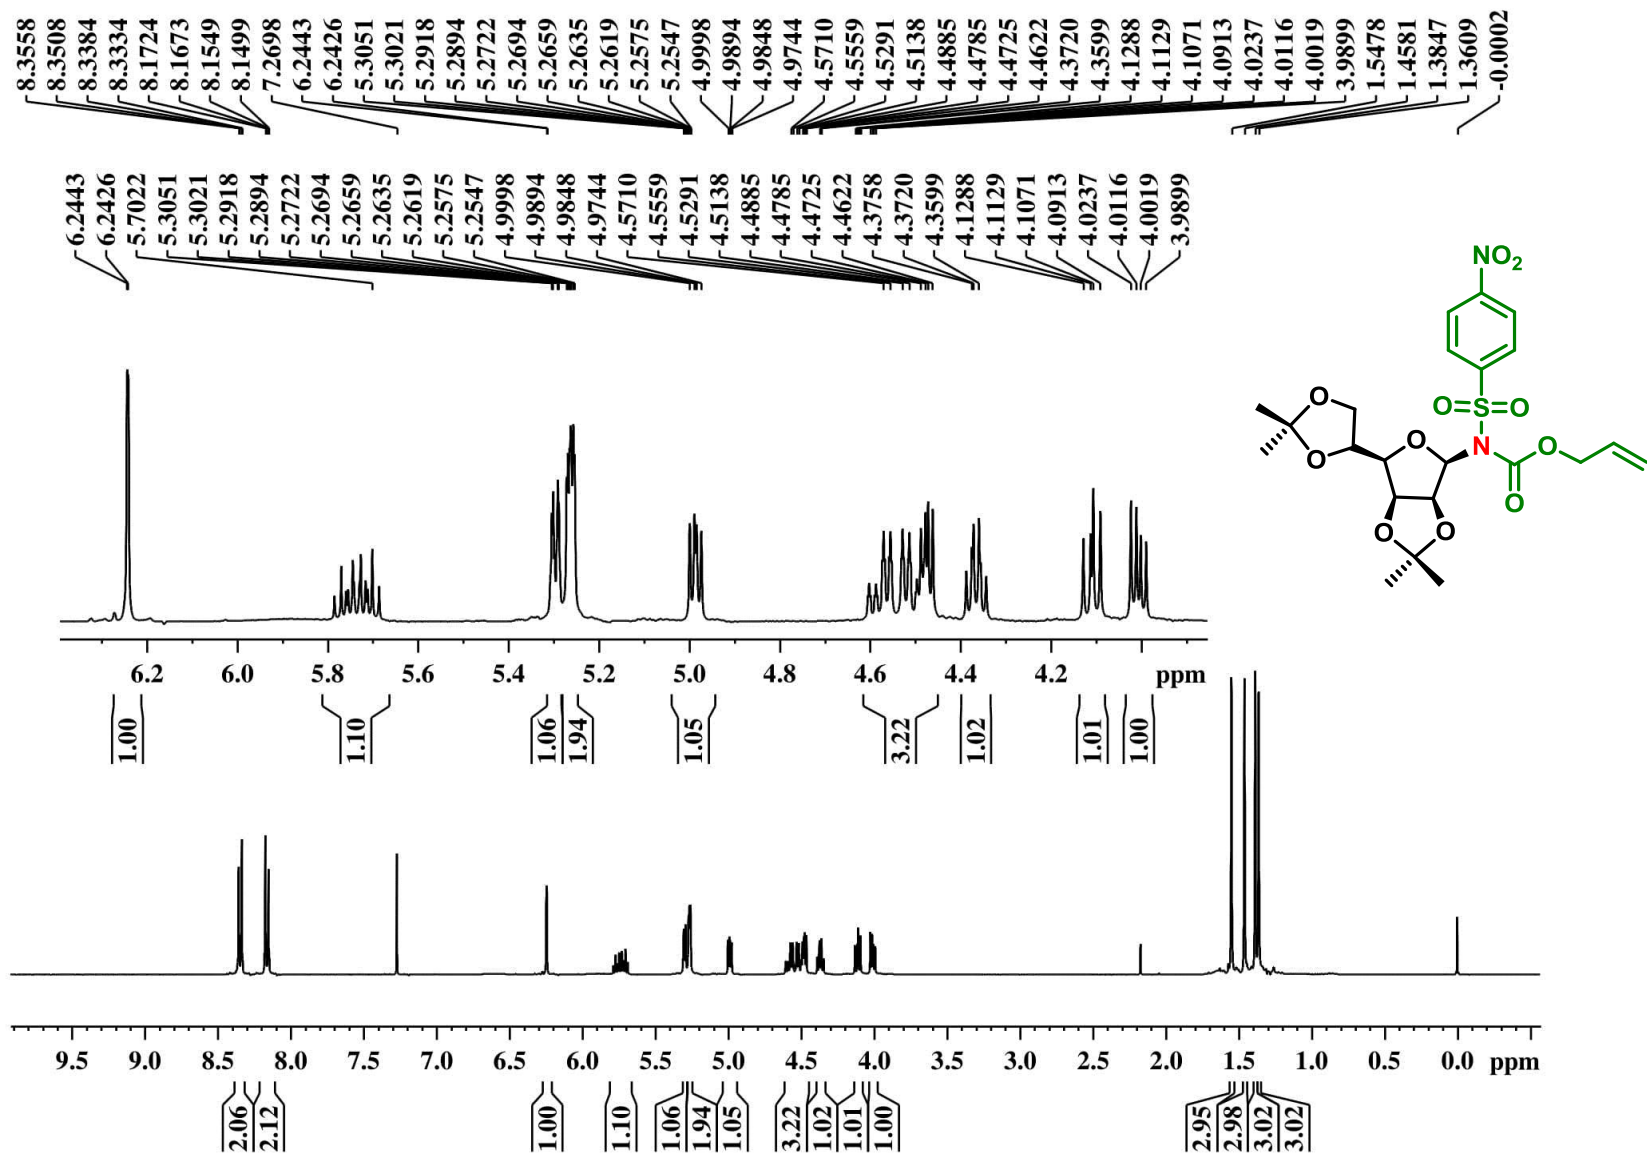

<sup>1</sup>H NMR spectrum of **3g** (400 MHz, CDCl<sub>3</sub>)

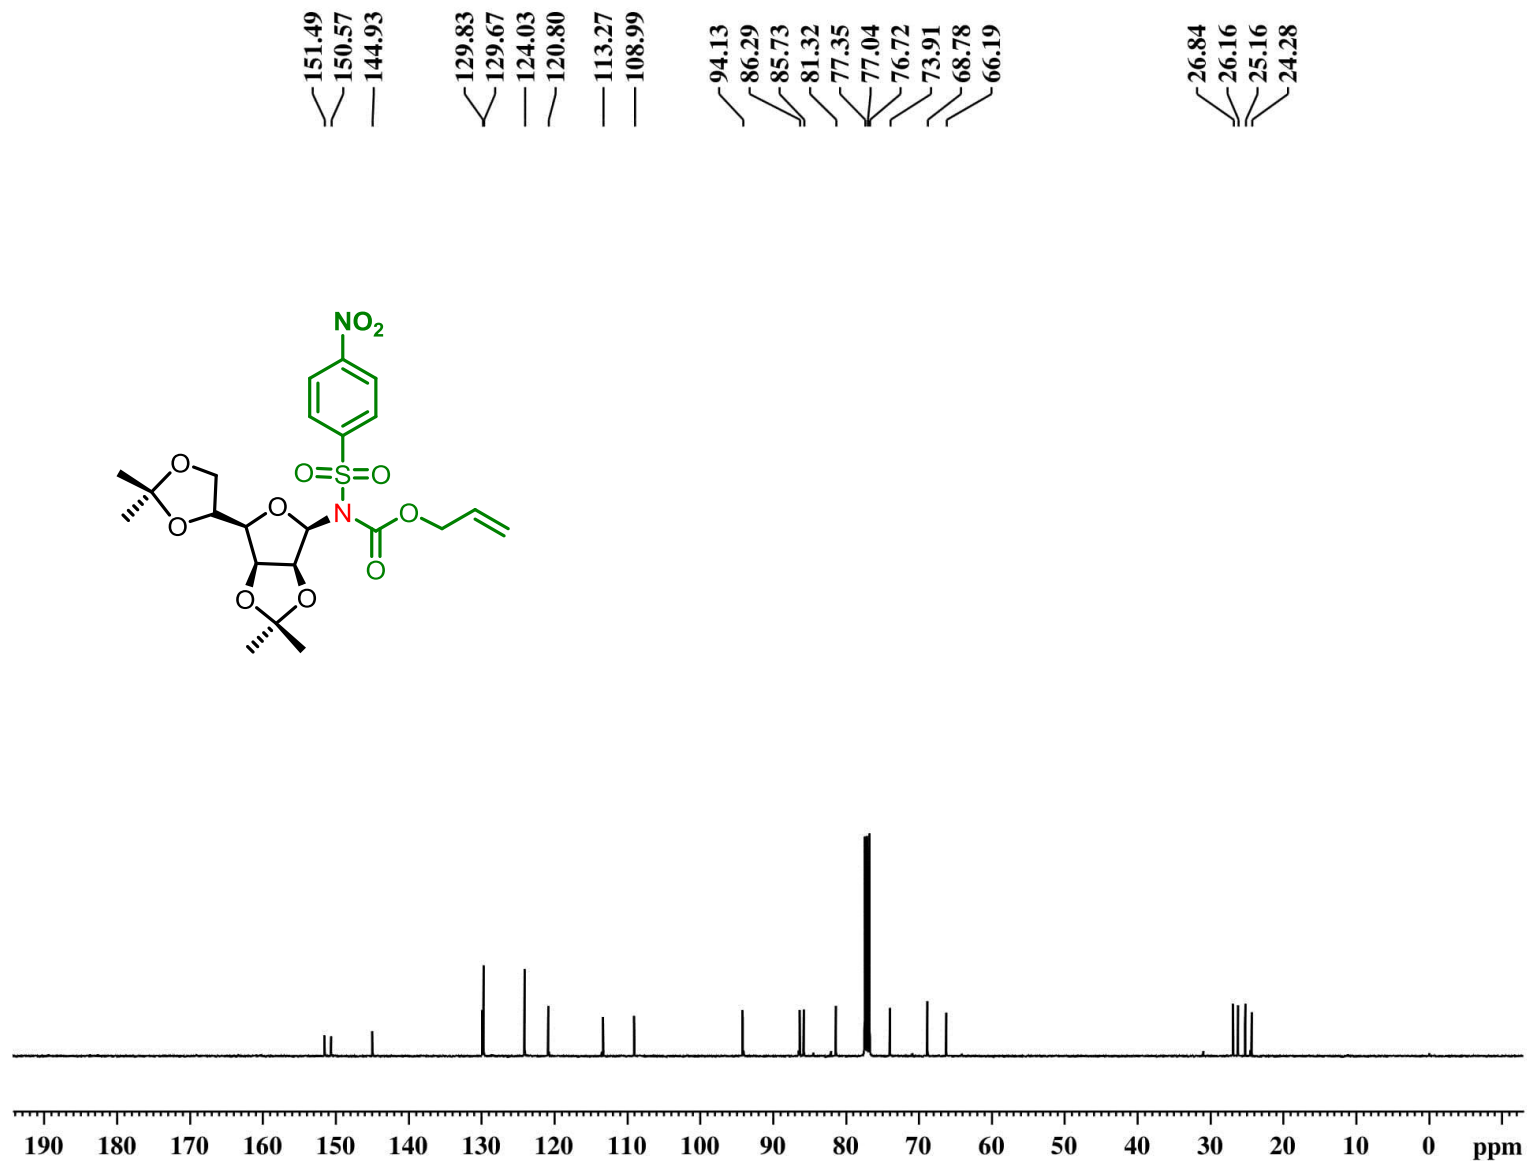

<sup>13</sup>C NMR spectrum of **3g** (100 MHz, MHz, CDCl<sub>3</sub>)

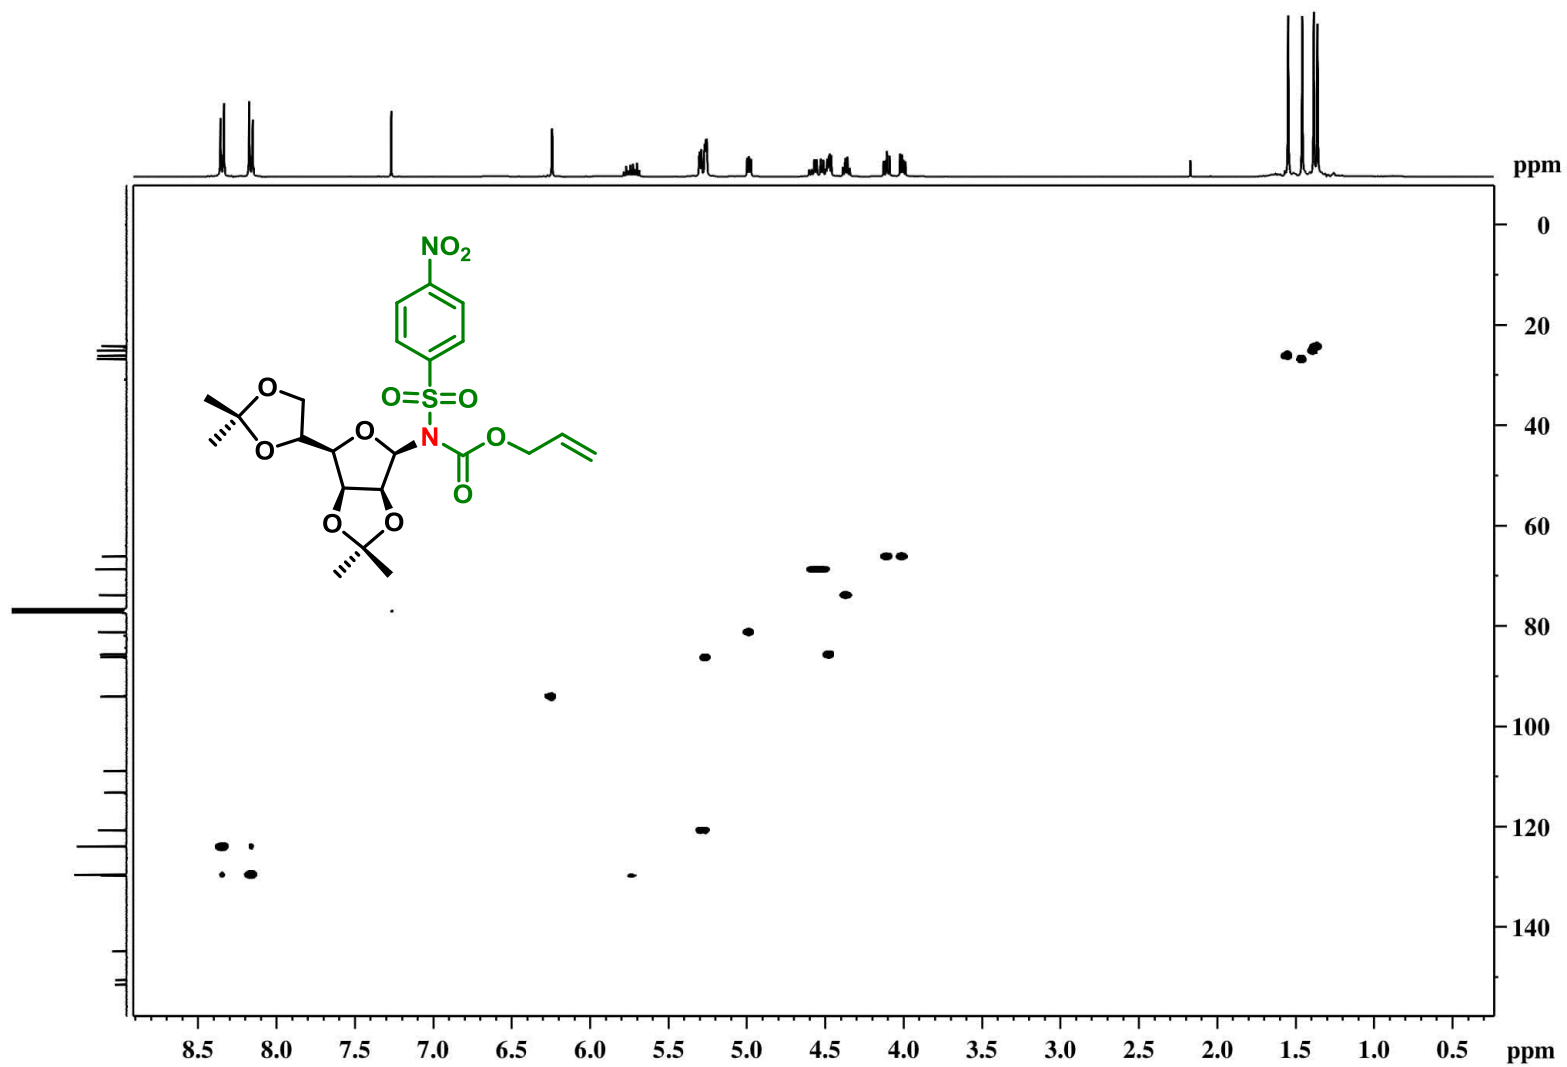

2D HSQC spectrum of **3g** ( $\text{CDCl}_3$ ).

## SAIF [HRMS Report]

|                   |                      |                       |                               |
|-------------------|----------------------|-----------------------|-------------------------------|
| Data File:        | HRMS21I05JAN19       | Original Data Path:   | D:\INTERNAL NEW\2021\Jan 2021 |
| Sample ID:        | PKM-NMA-01           | Sample Name:          |                               |
| Acquisition Date: | 01/05/21 11:59:09 AM | Run Time(min):        | 0.00                          |
| Vial:             | CStk1-01:19          | Injection Volume(μl): | 1.00                          |

HRMS21I05JAN19 #30-60 RT: 0.25-0.50 AV: 31 SB: 1 0.01 NL: 2.18E5  
T: FTMS + c ESI Full ms [100.00-750.00]

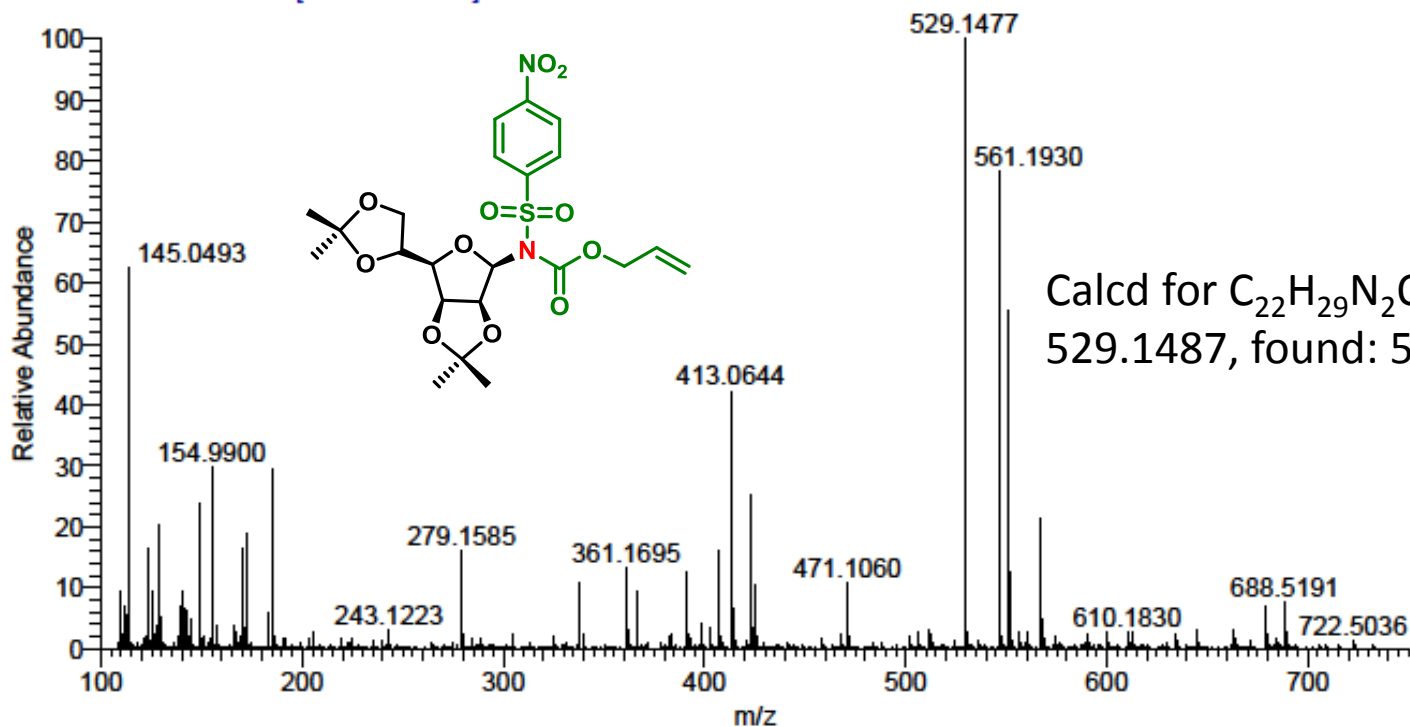

HRMS of **3g**

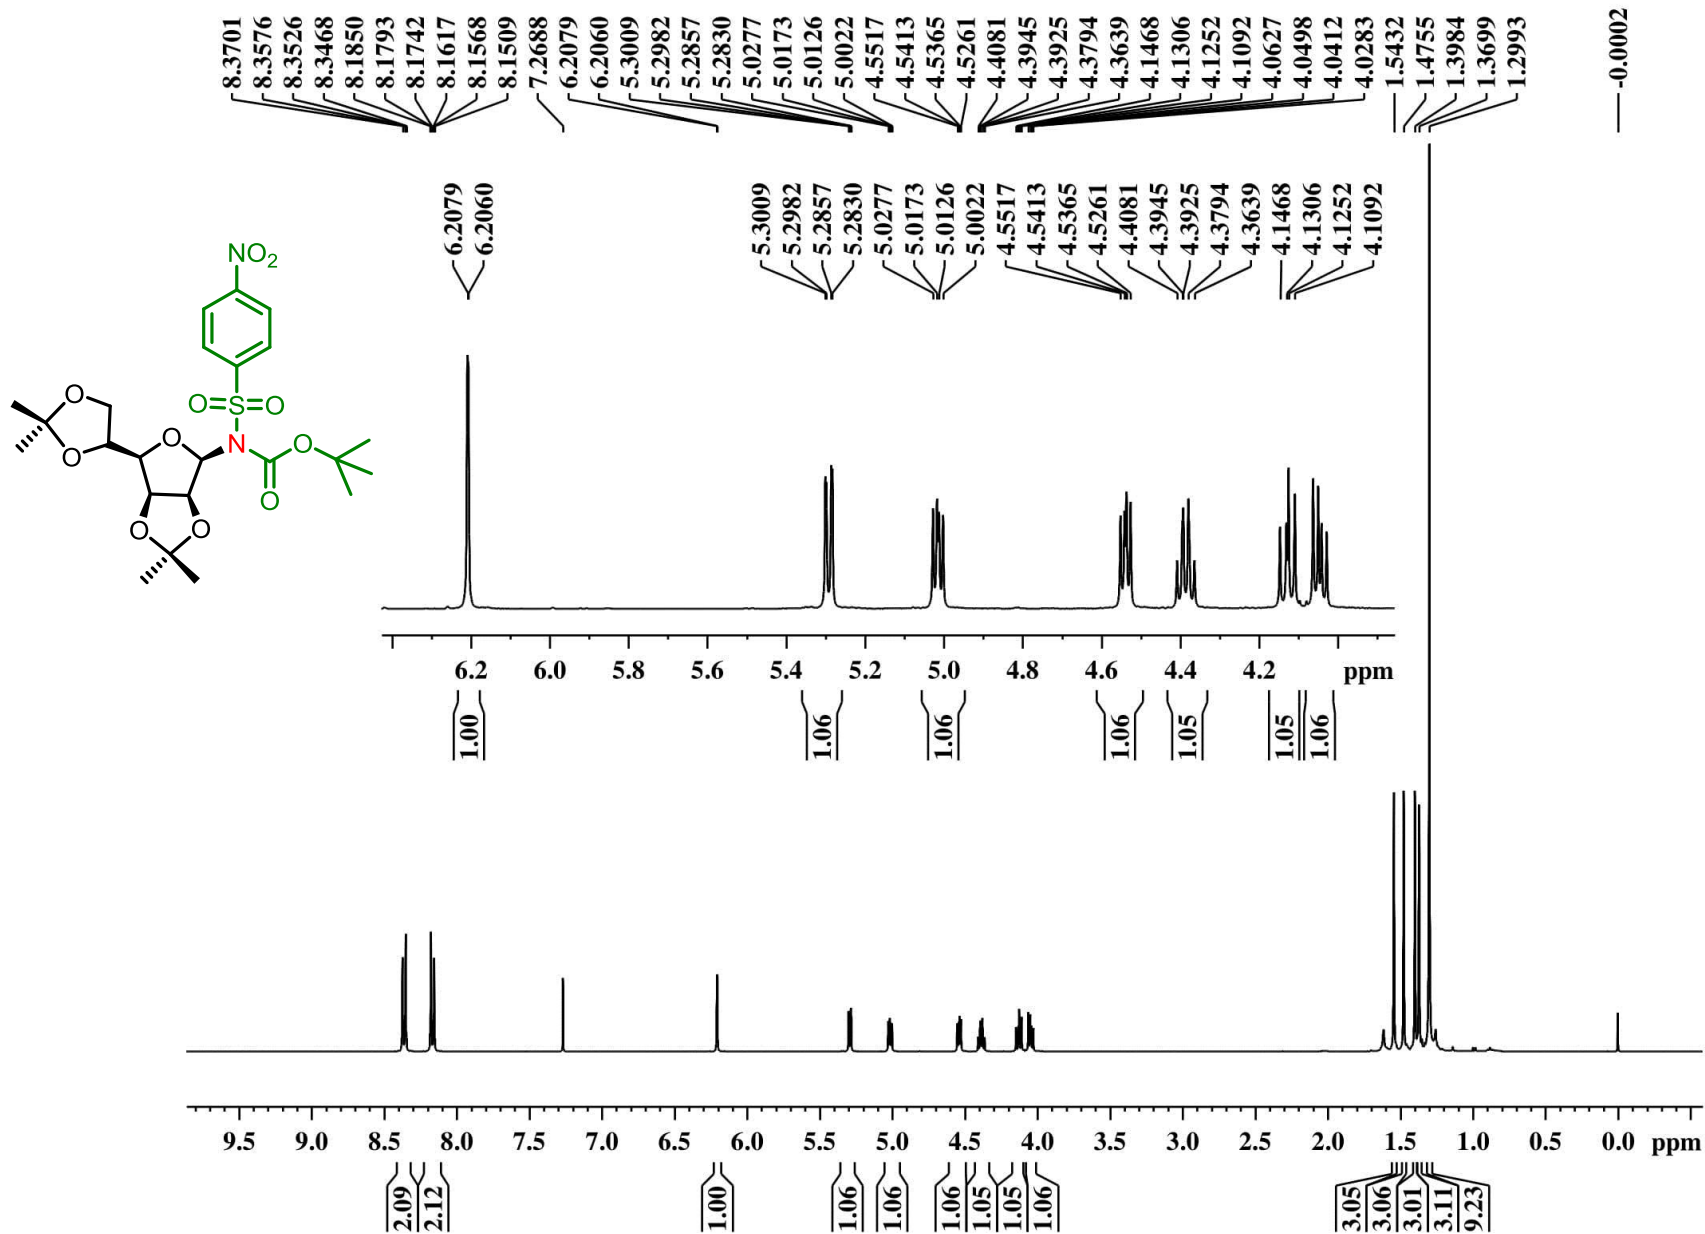

<sup>1</sup>H NMR spectrum of **3h** (400 MHz, CDCl<sub>3</sub>)

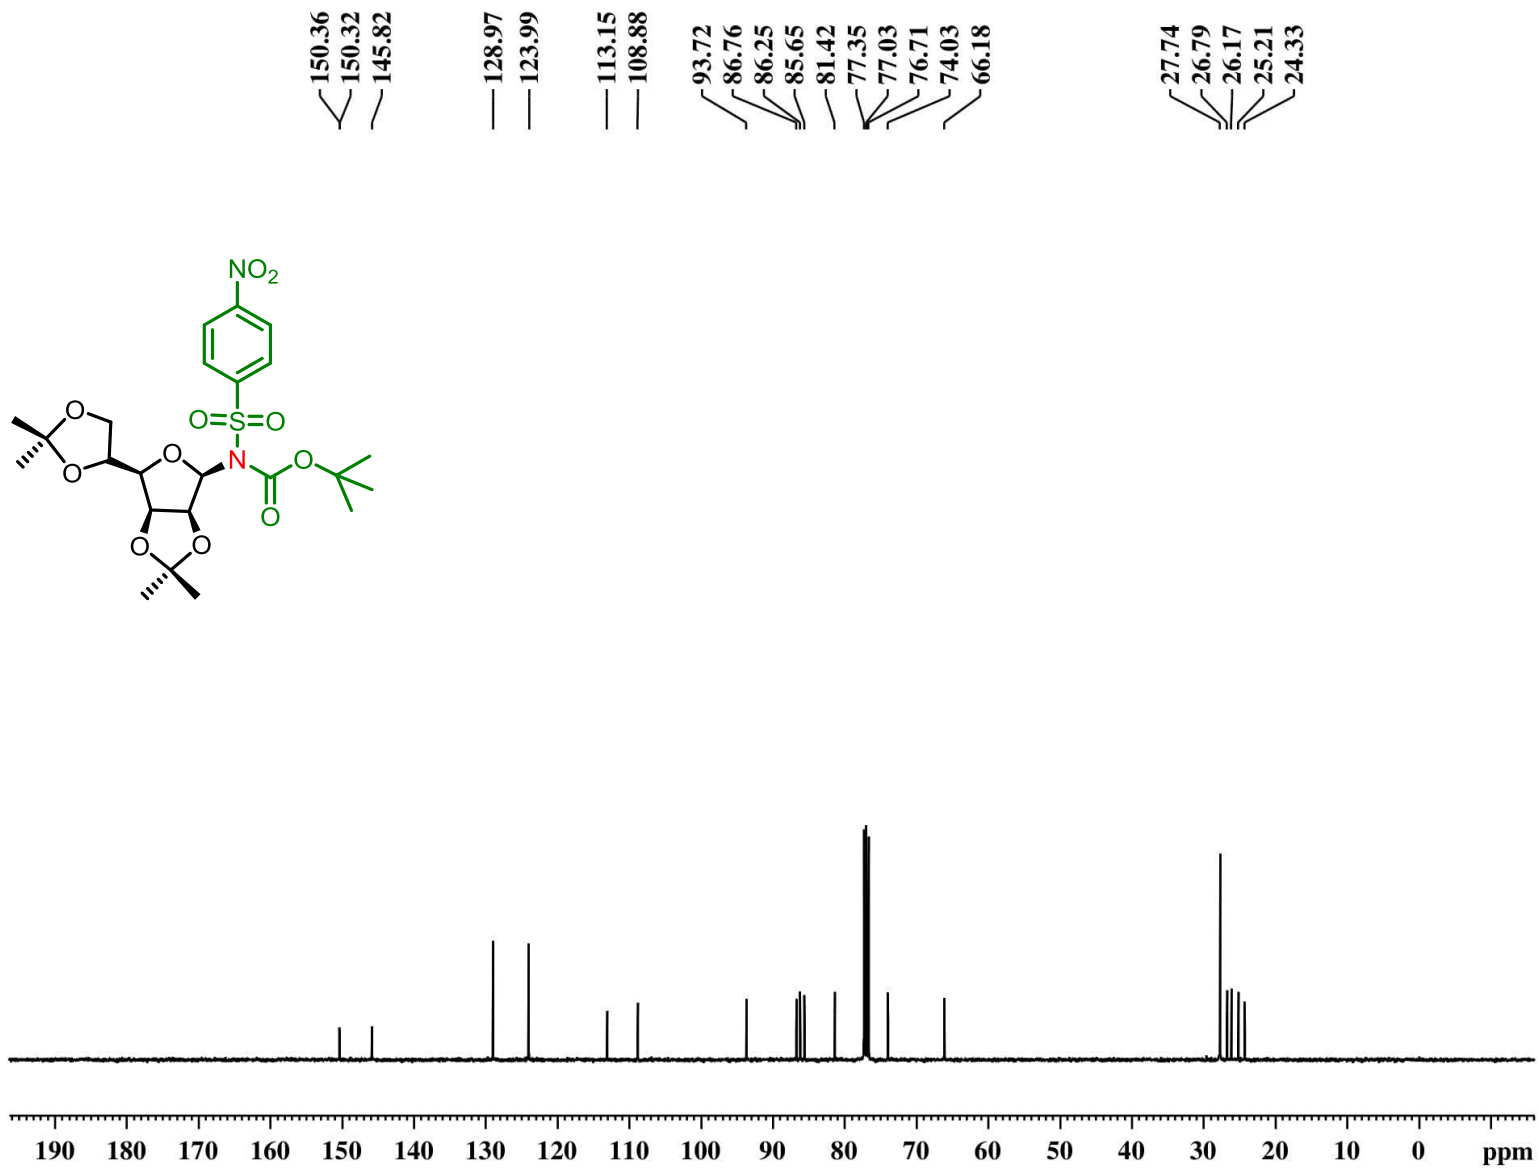

$^{13}\text{C}$  NMR spectrum of **3h** (100 MHz,  $\text{CDCl}_3$ )

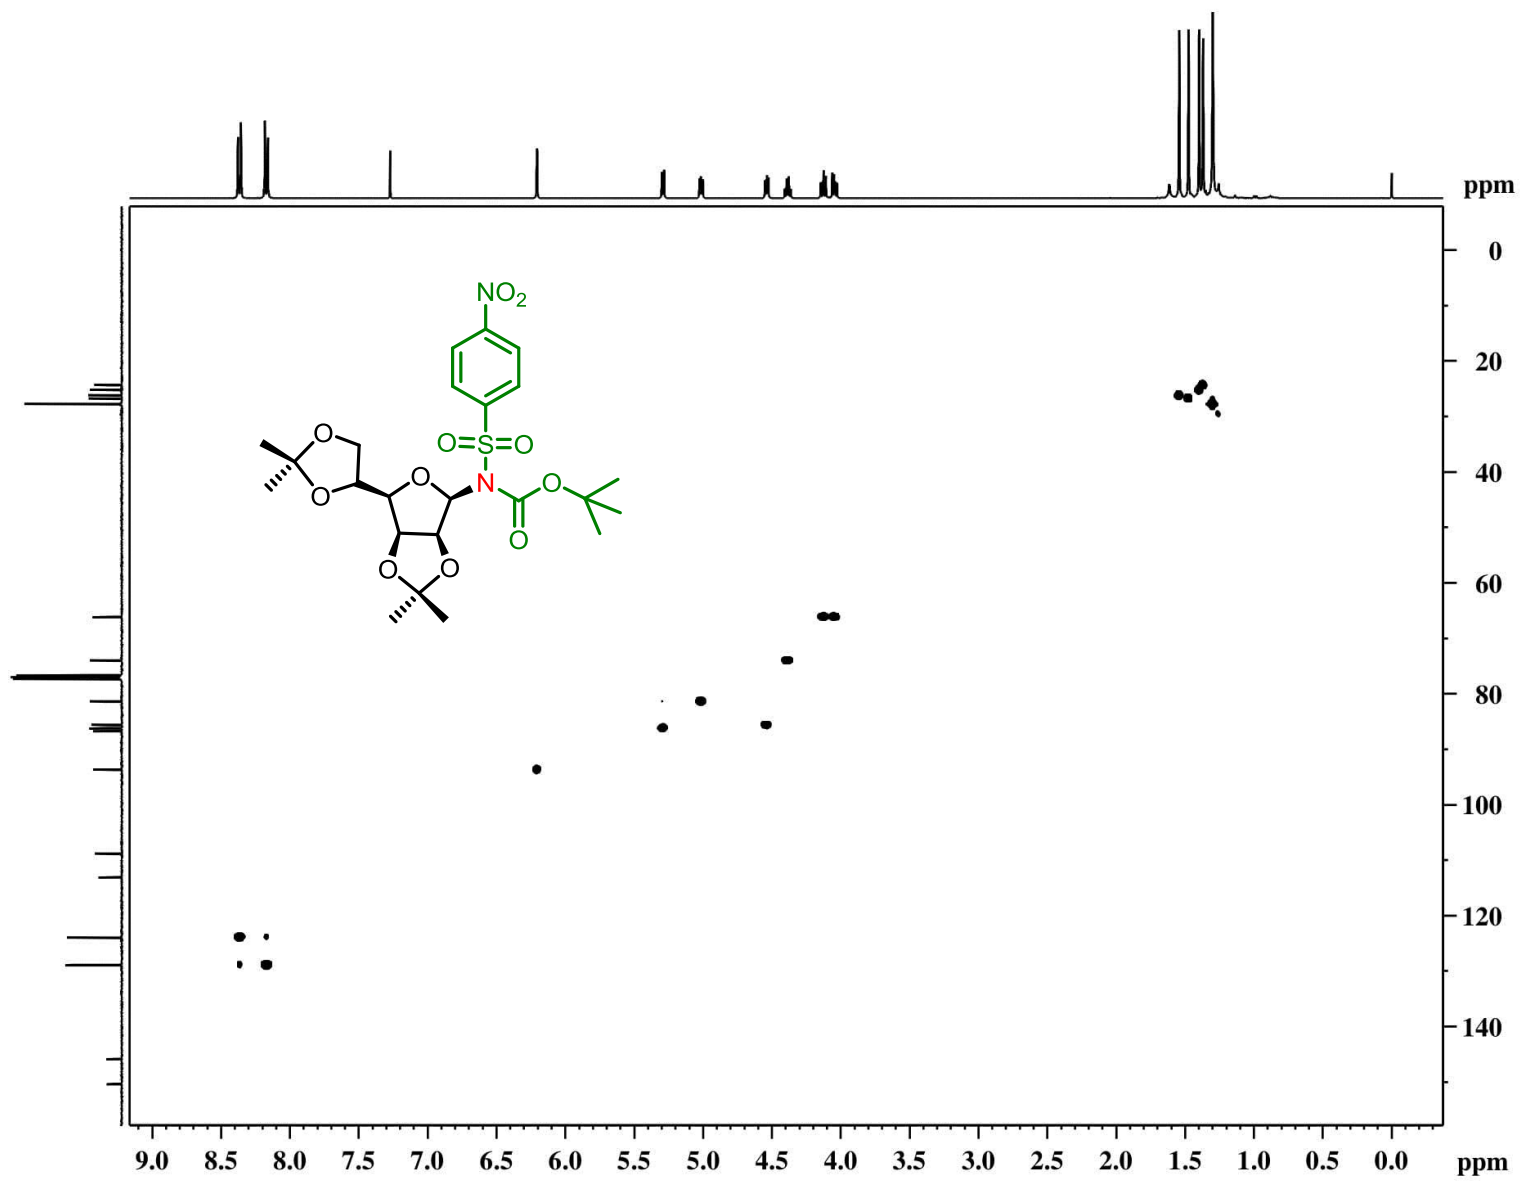

2D HSQC spectrum of **3h** (CDCl<sub>3</sub>).

## SAIF [HRMS Report]

|                   |                      |                       |                                  |
|-------------------|----------------------|-----------------------|----------------------------------|
| Data File:        | HRMS20I01OCT03       | Original Data Path:   | D:\INTERNAL NEW\2020\OCT<br>2020 |
| Sample ID:        | PKM-NMB-01           | Sample Name:          |                                  |
| Acquisition Date: | 10/01/20 10:53:37 AM | Run Time(min):        | 0.00                             |
| Vial:             | CS&k1-01:3           | Injection Volume(μl): | 1.00                             |

HRMS20I01OCT03 #12-24 RT: 0.11-0.21 AV: 13 SB: 1 0.01 NL: 3.90E6  
T: FTMS + p ESI Full ms [100.00-1500.00]

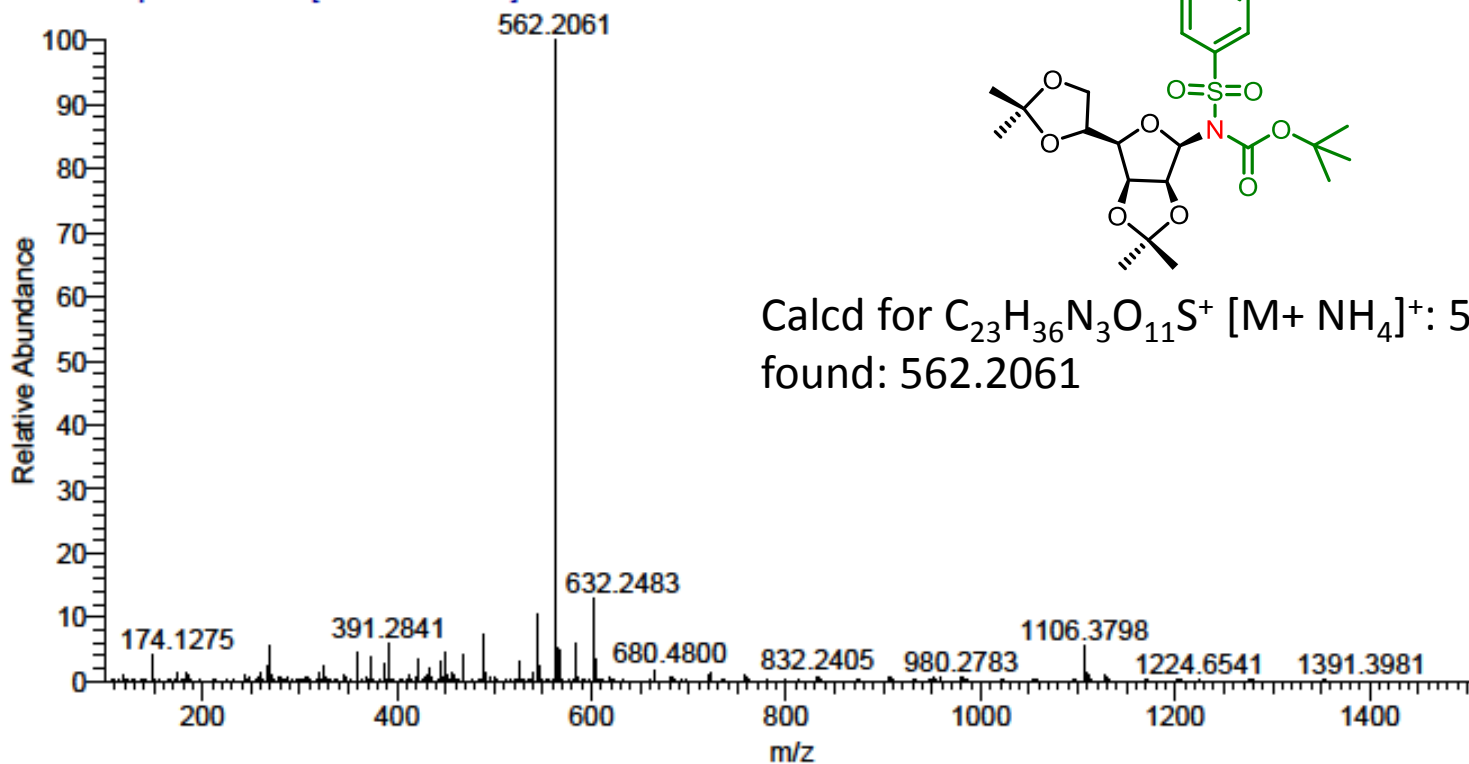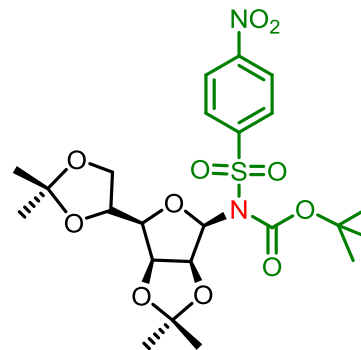

Calcd for  $C_{23}H_{36}N_3O_{11}S^+$   $[M+NH_4]^+$ : 562.2065,  
found: 562.2061

HRMS of **3h**



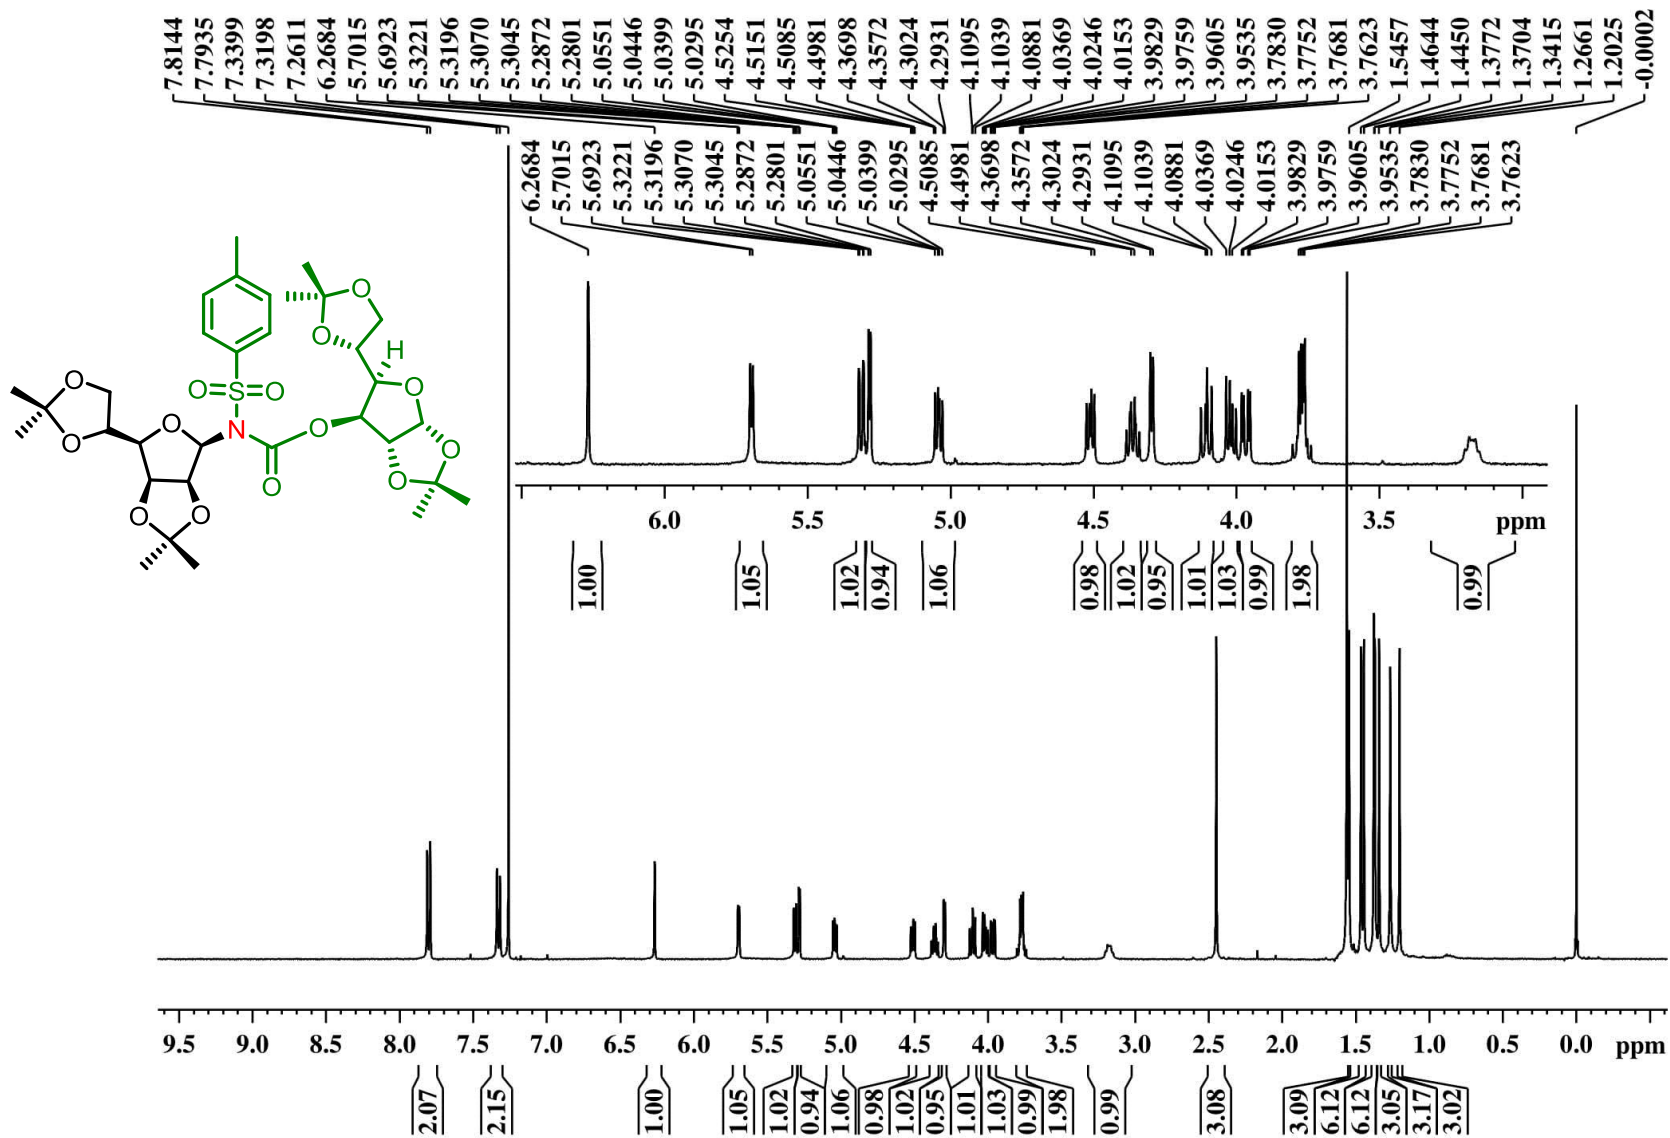

<sup>1</sup>H NMR spectrum of **3i** (400 MHz, CDCl<sub>3</sub>)

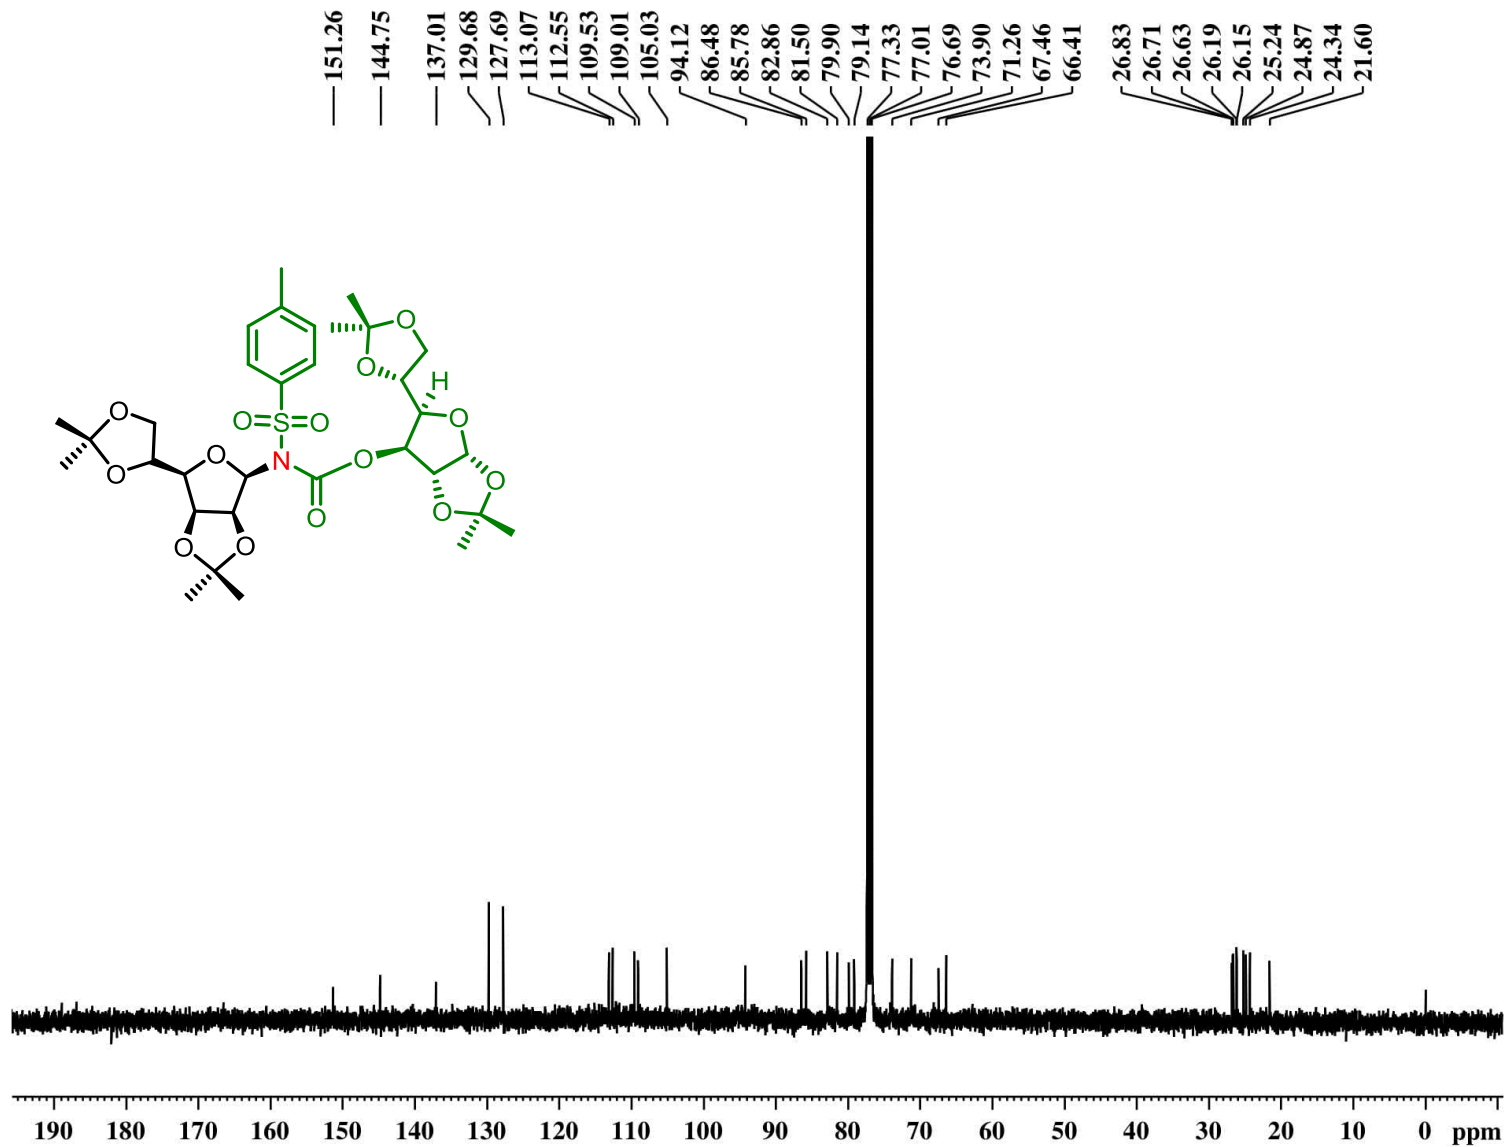

$^{13}\text{C}$  NMR spectrum of **3i** (100 MHz, MHz,  $\text{CDCl}_3$ )

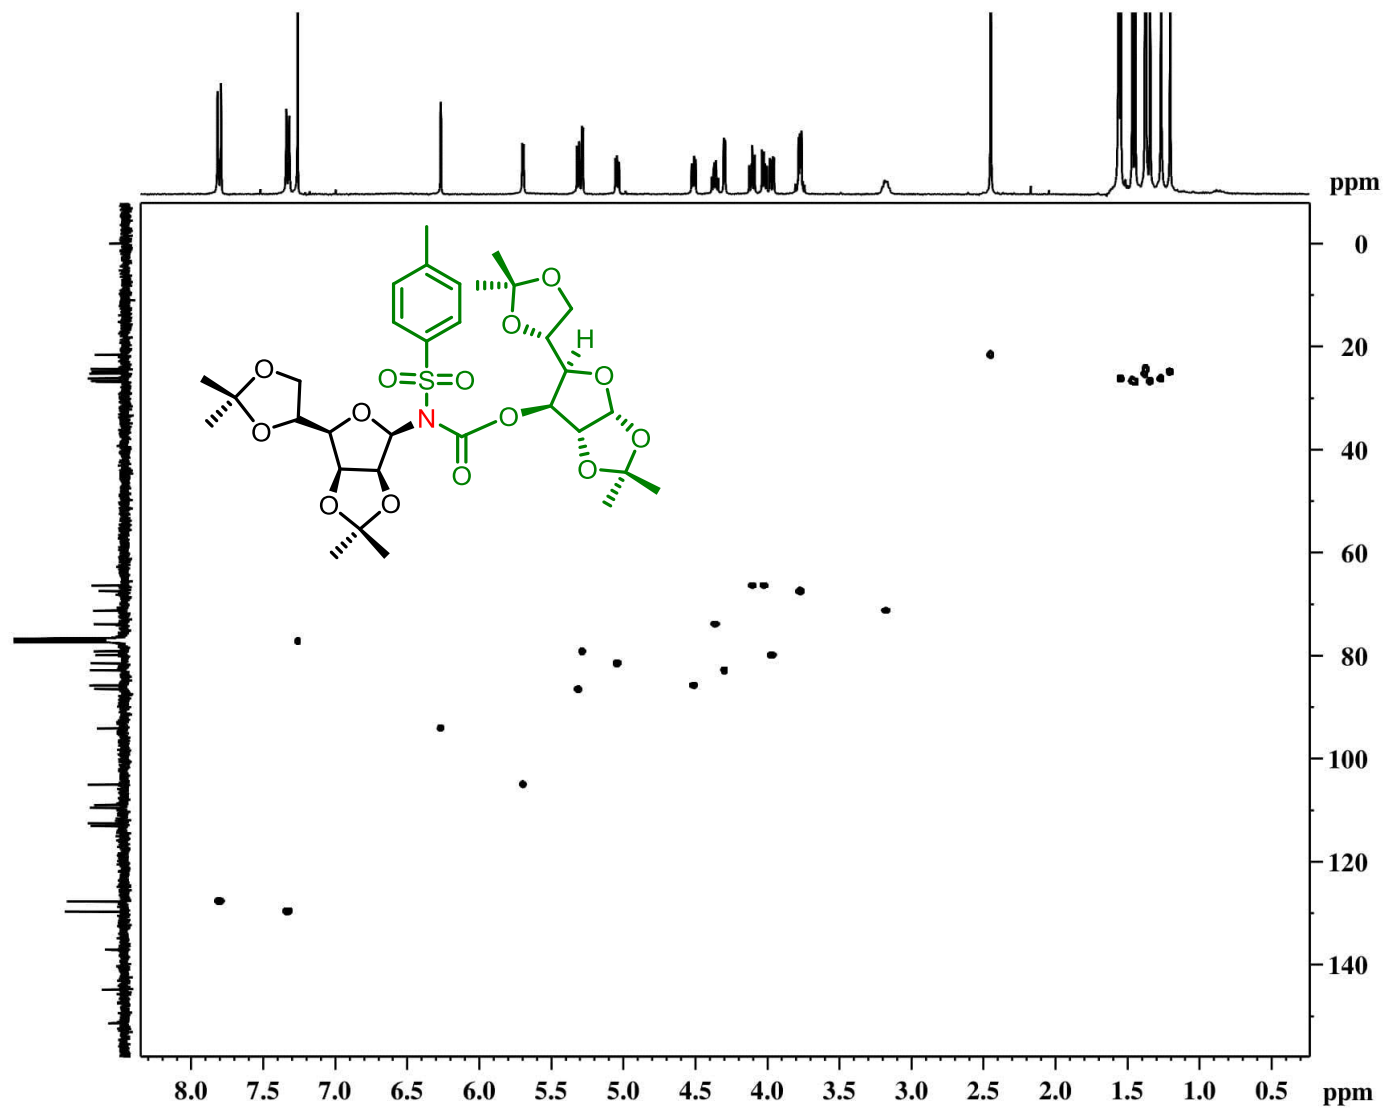

2D HSQC spectrum of **3i** (CDCl<sub>3</sub>).

HRMS20i13MAR10 #19-32 RT: 0.14-0.24 AV: 14 NL: 9.58E6  
T: FTMS + p ESI Full ms [100.00-1500.00]

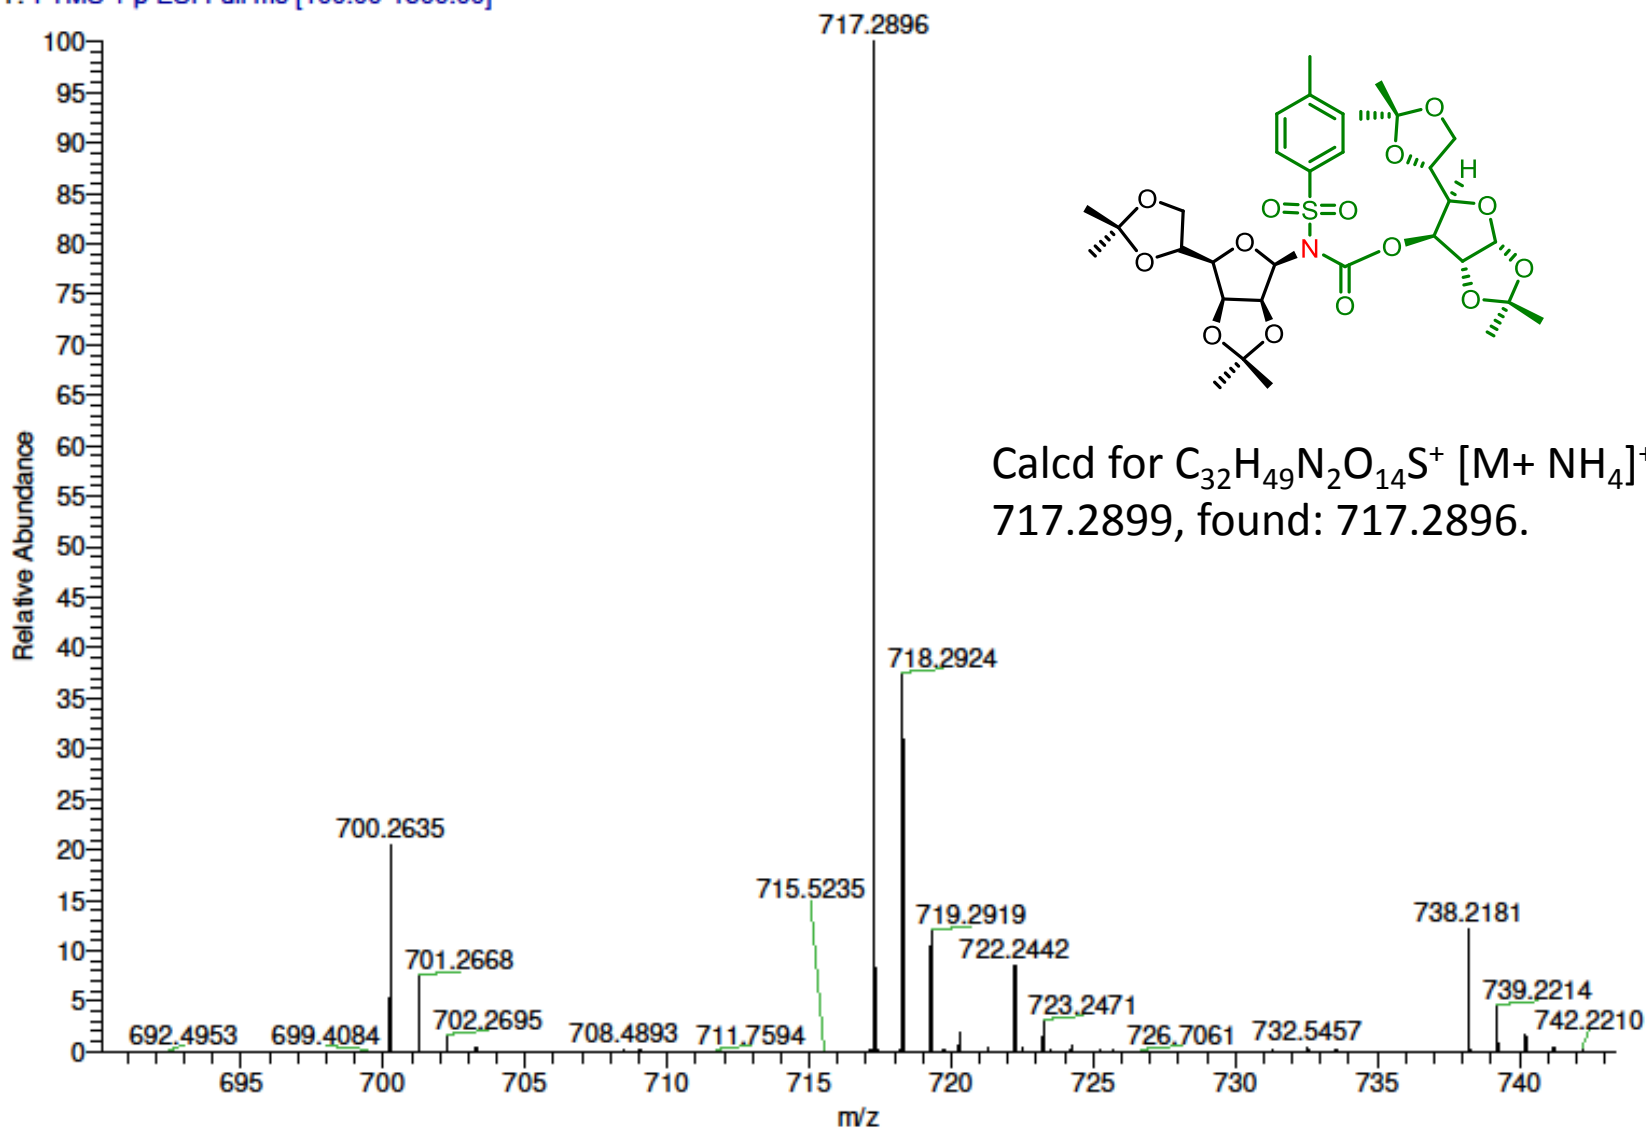

HRMS of **3i**

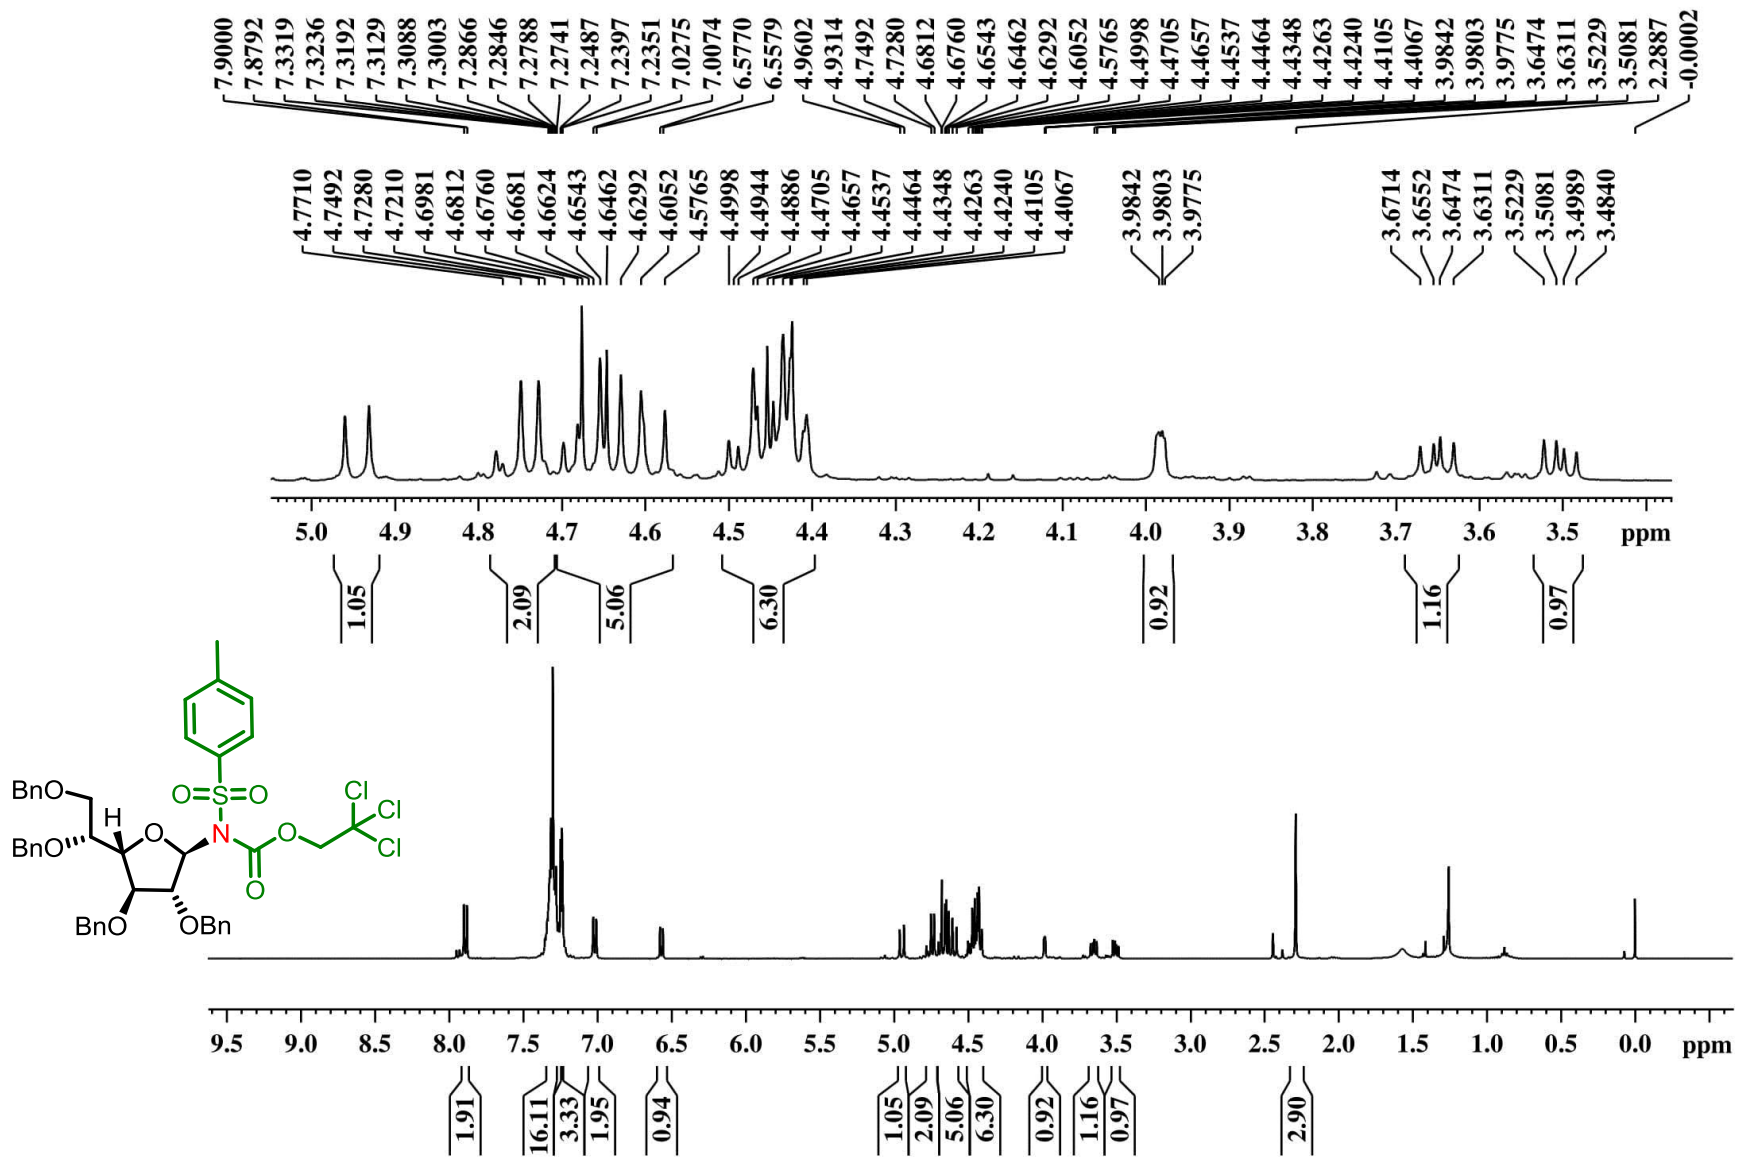

**<sup>1</sup>H NMR spectrum of 3j (400 MHz, CDCl<sub>3</sub>)**

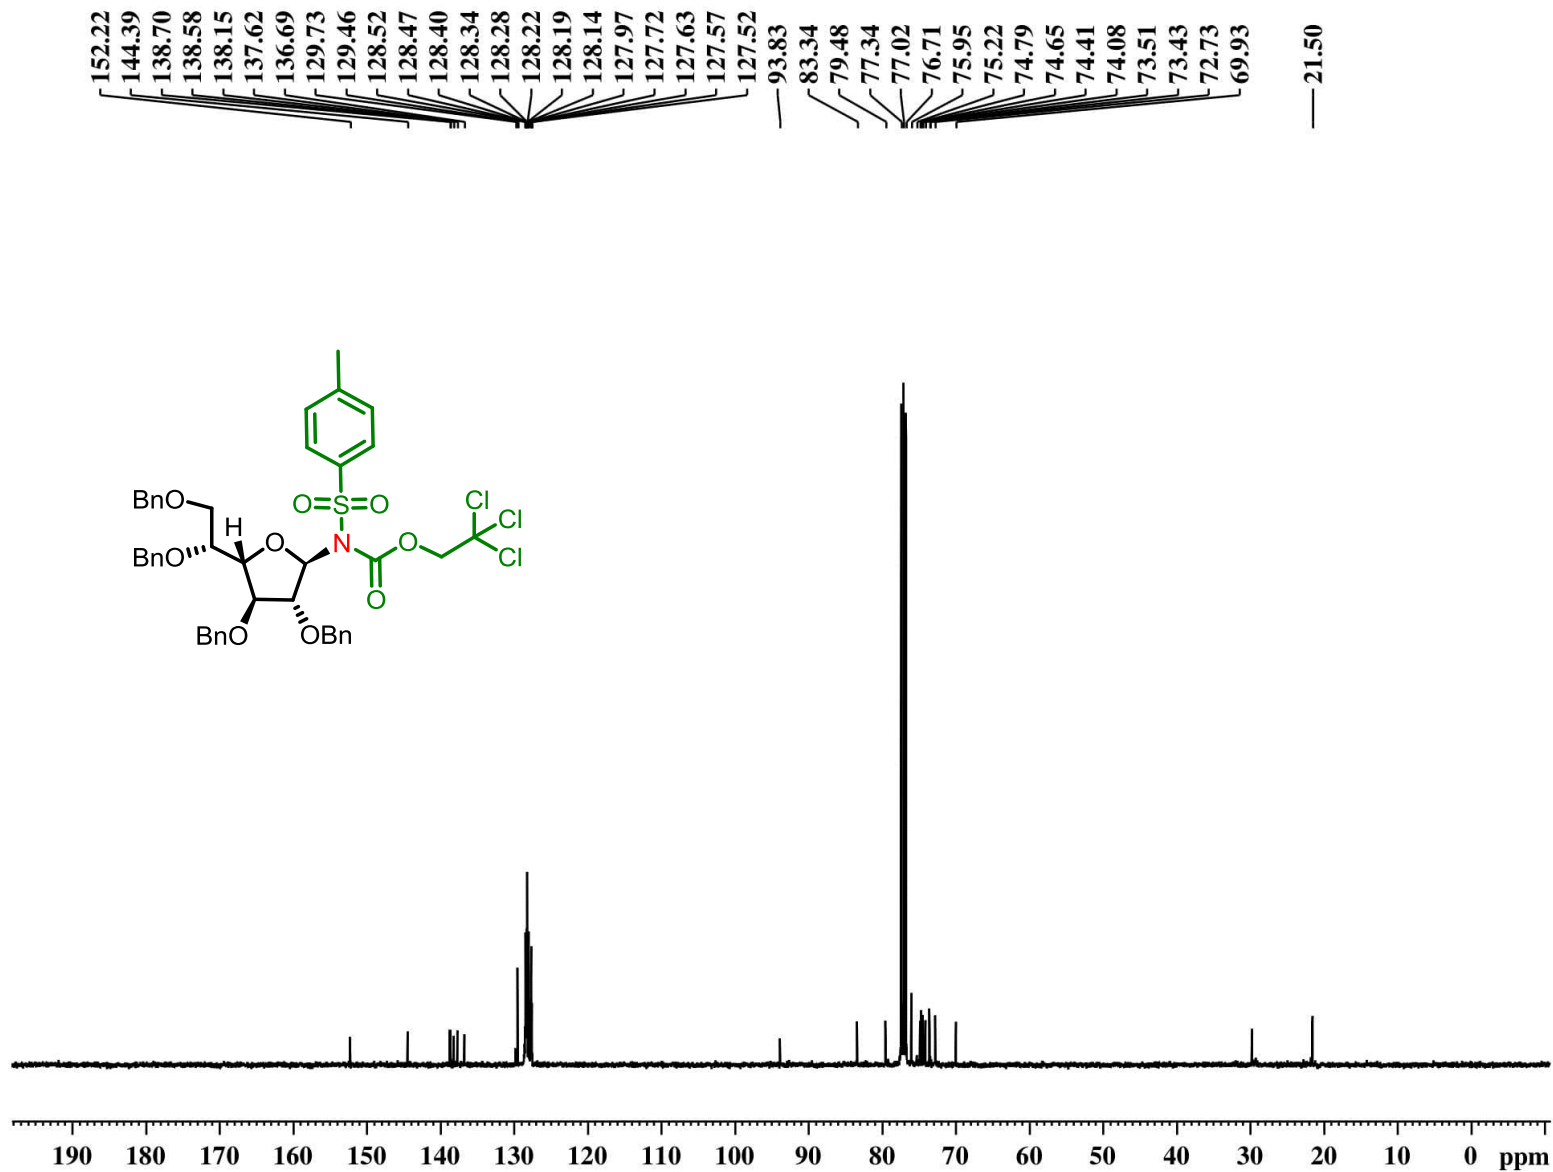

$^{13}\text{C}$  NMR spectrum of **3j** (100 MHz,  $\text{CDCl}_3$ )

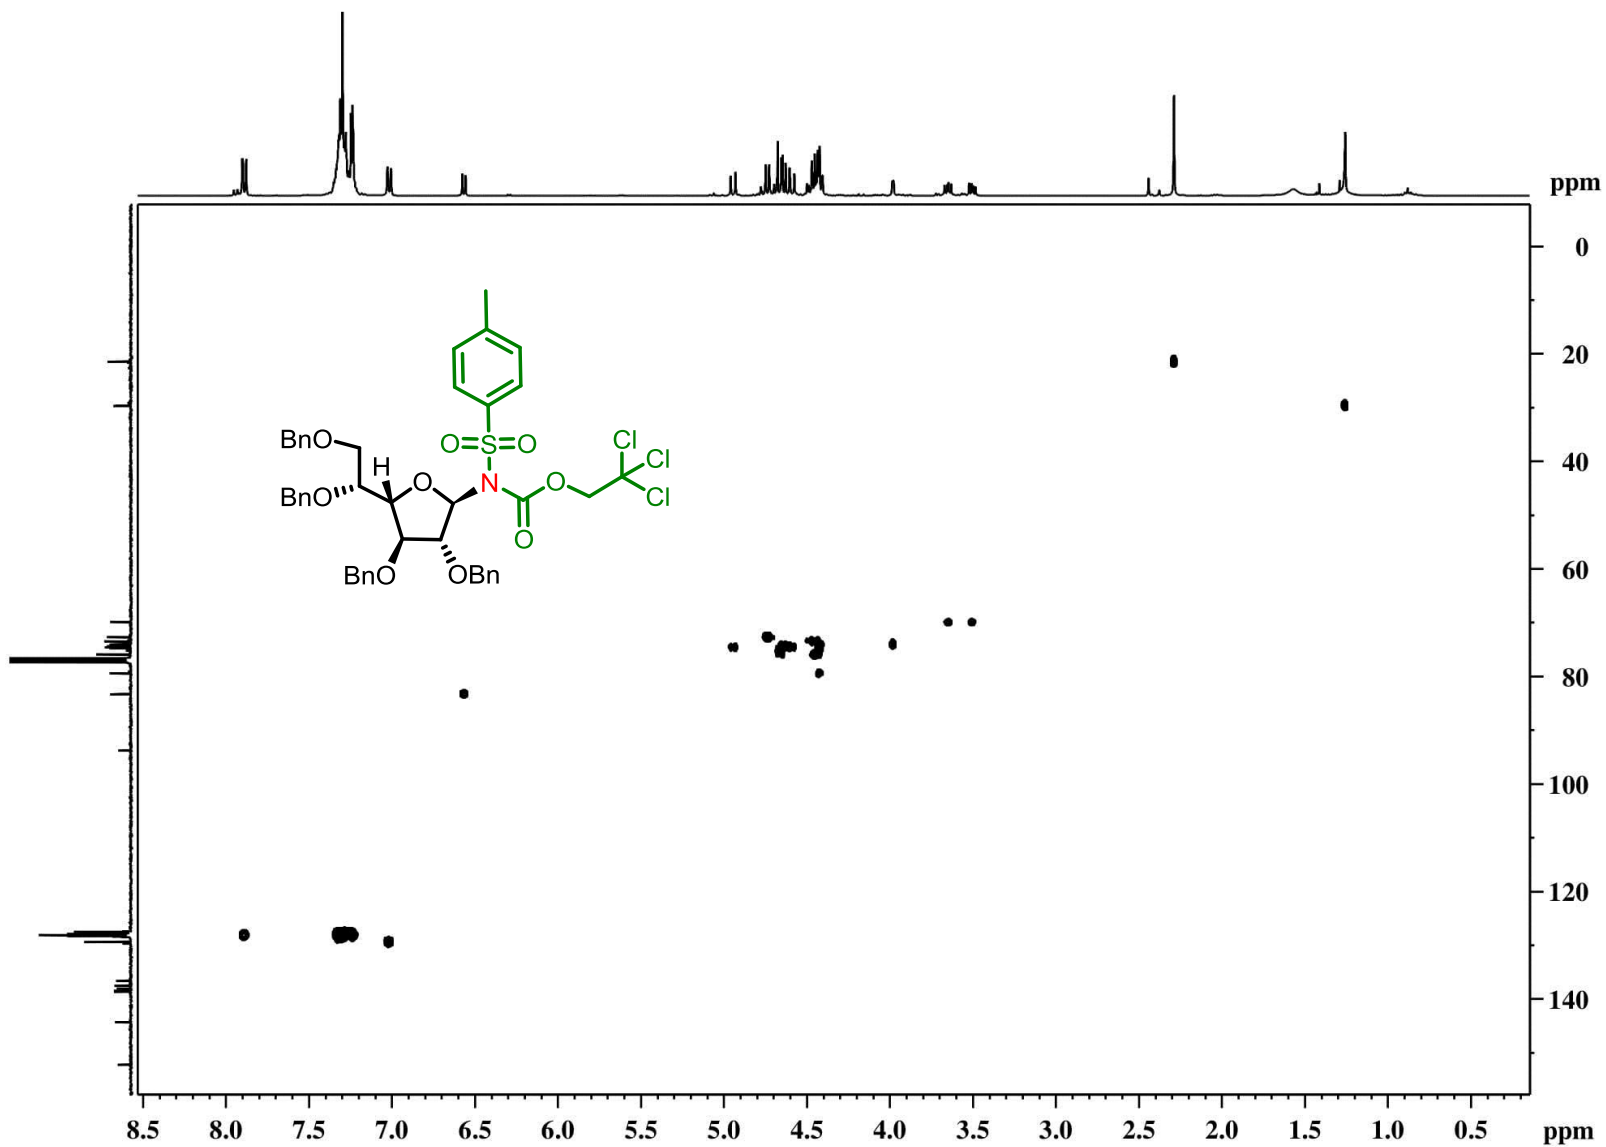

2D HSQC spectrum of **3j** (CDCl<sub>3</sub>).

HRMS20109JUL03 #16-36 RT: 0.13-0.29 AV: 21 SB: 7 0.02-0.07 NL: 8.96E5  
T: FTMS + p ESI Full ms [100.00-1500.00]

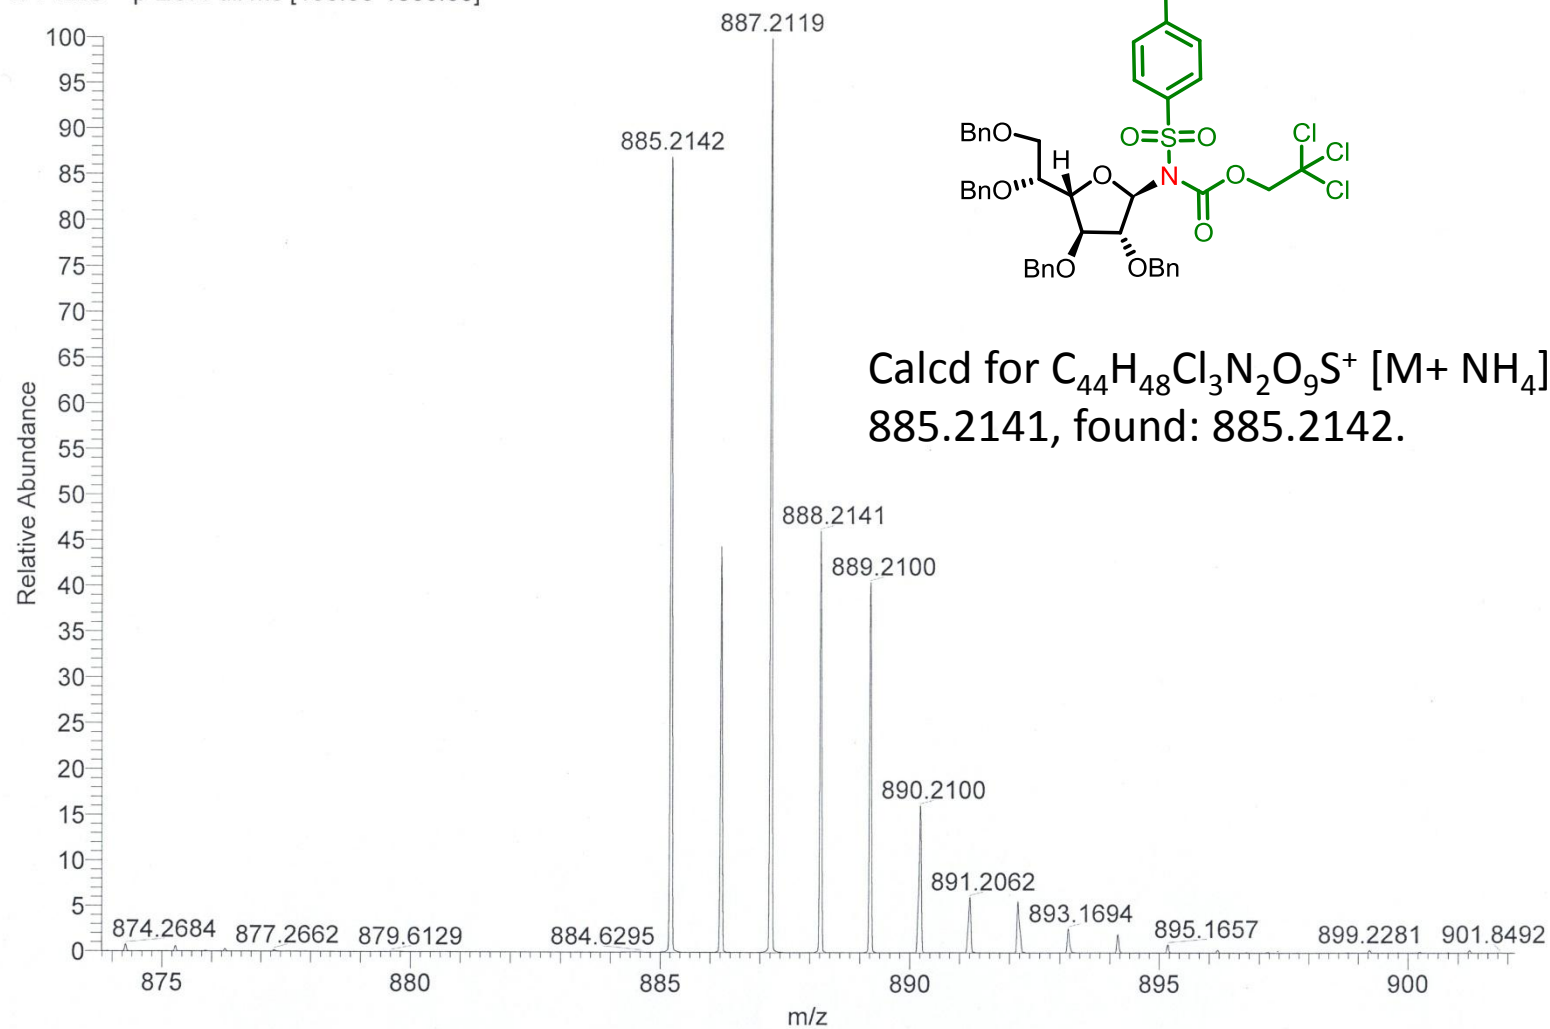

HRMS of **3j**



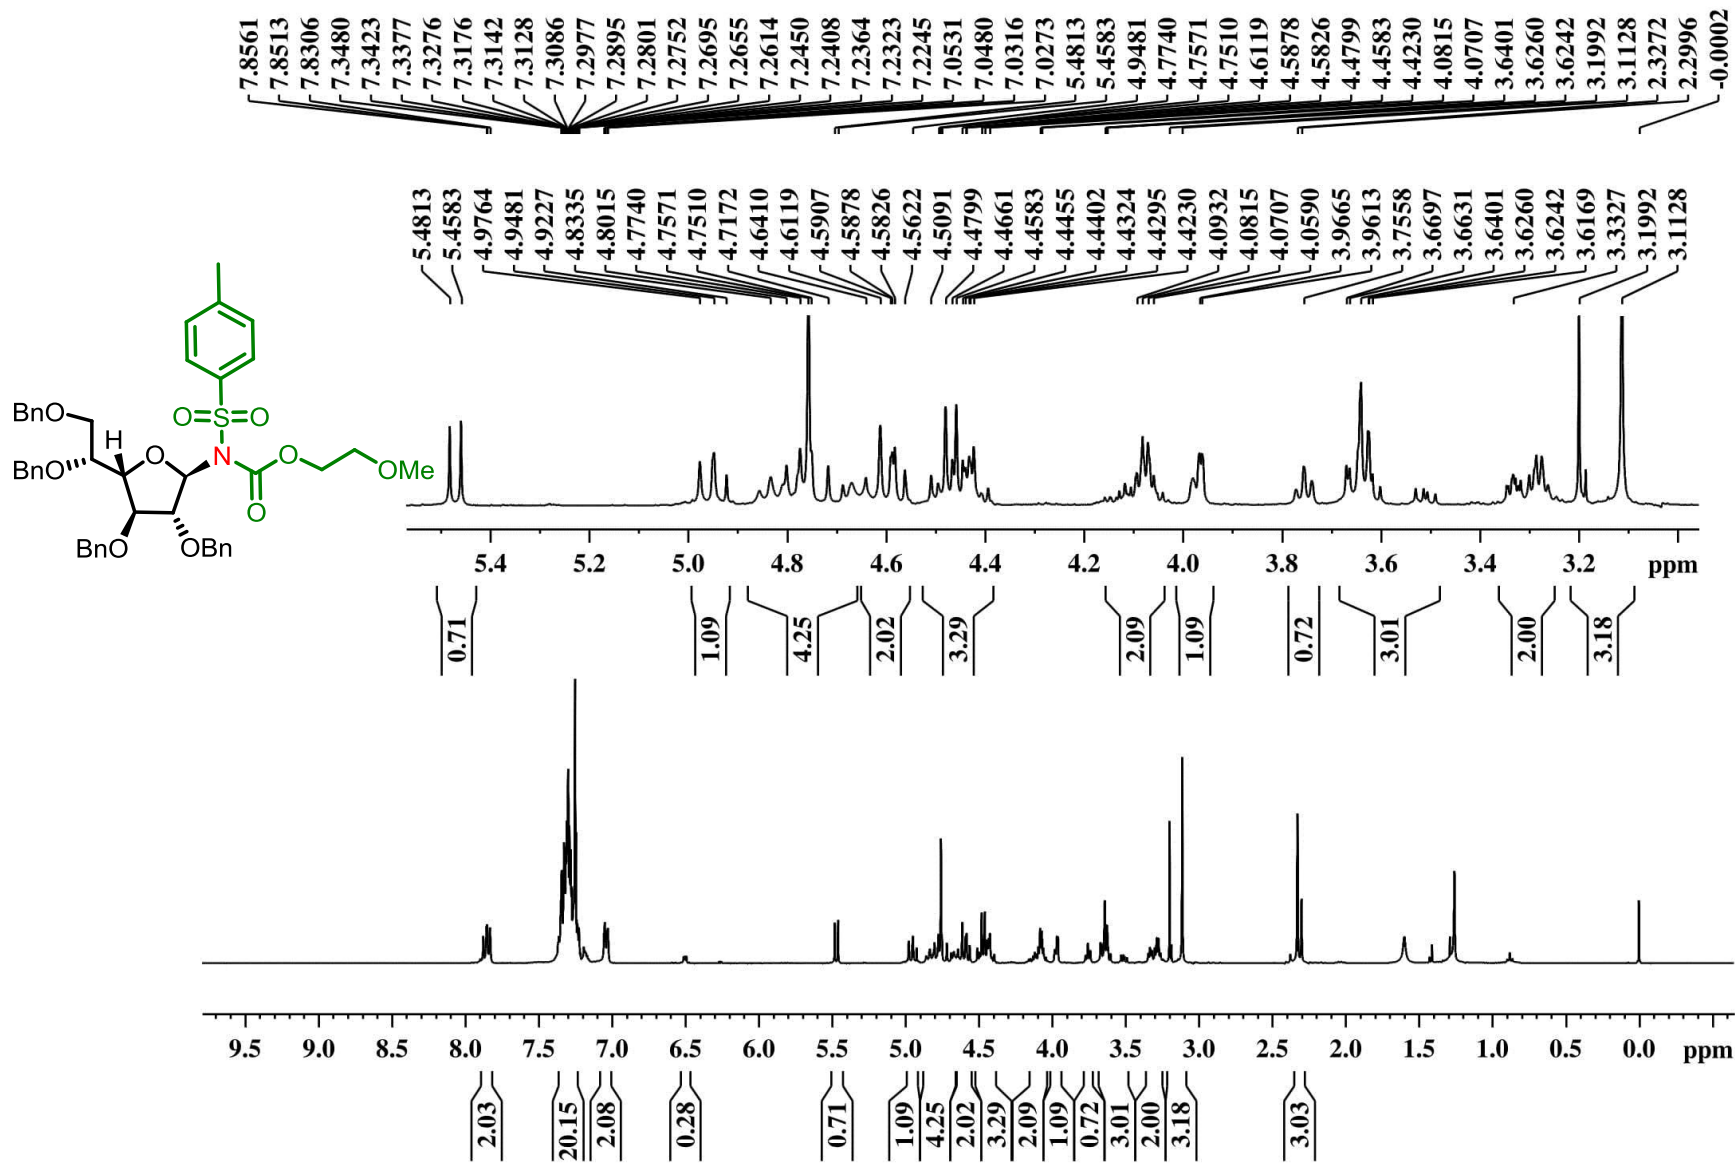

$^1\text{H}$  NMR spectrum of **3k** (400 MHz,  $\text{CDCl}_3$ )

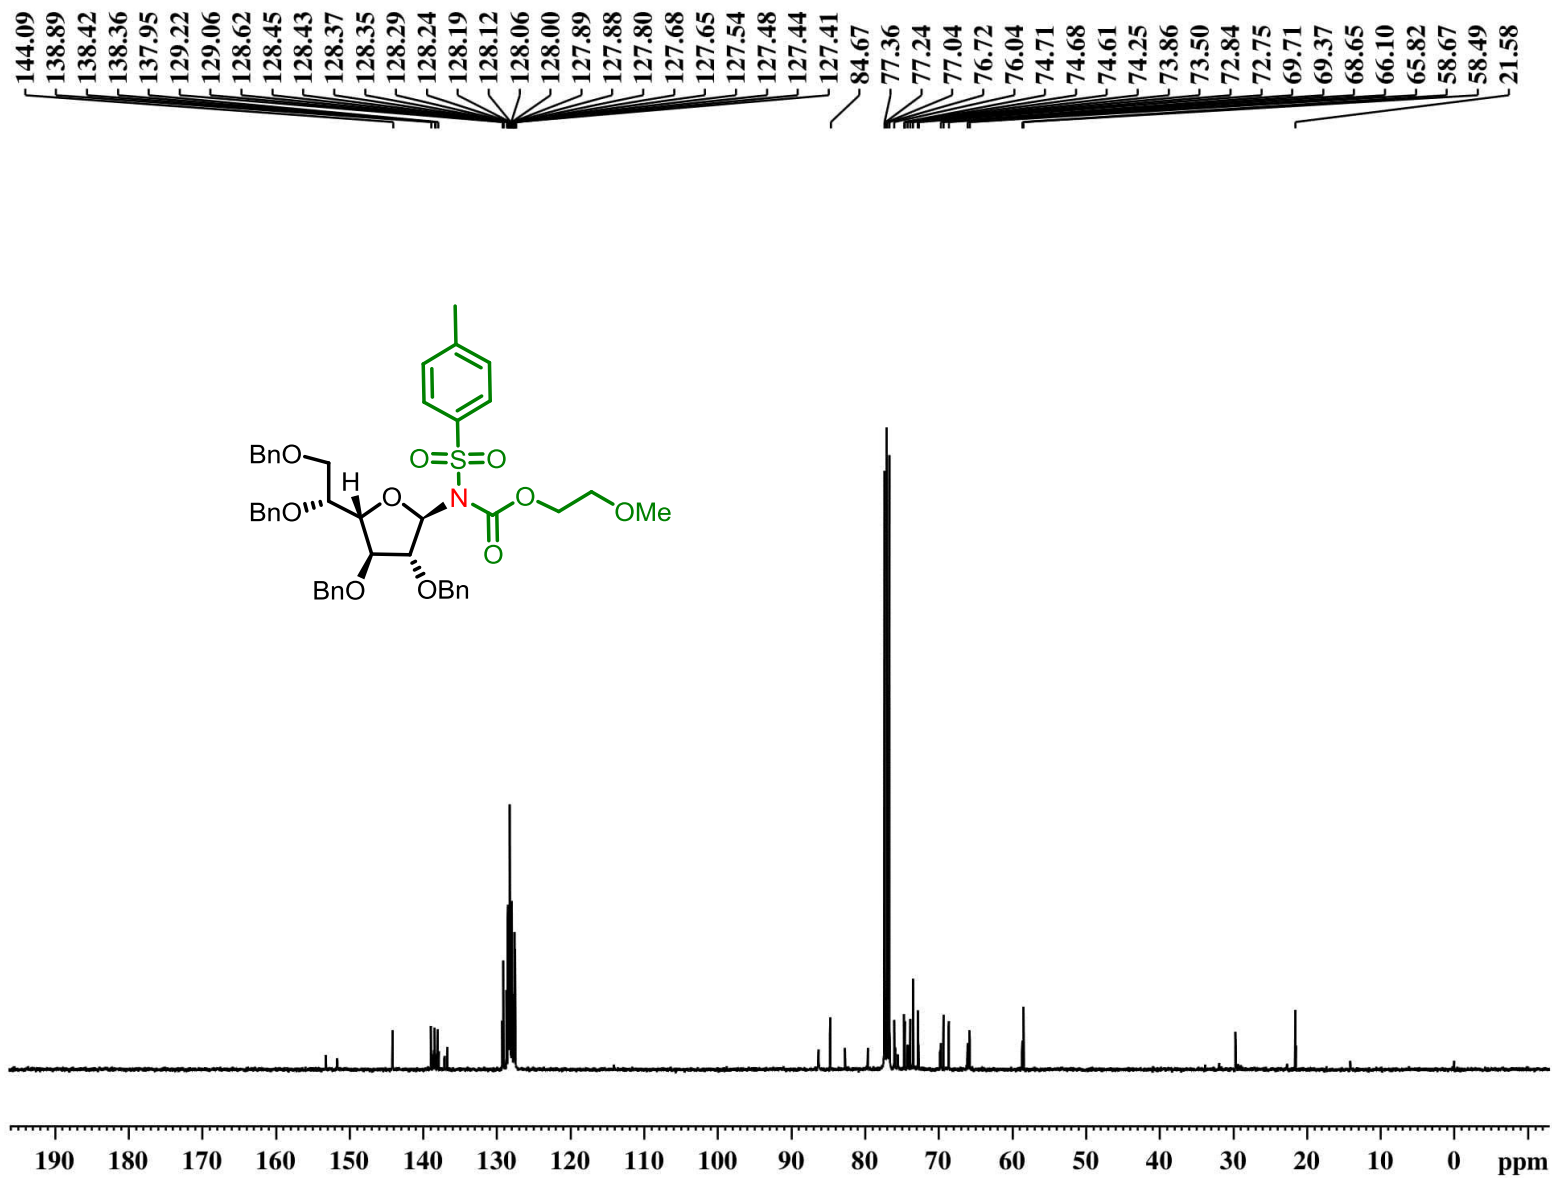

<sup>13</sup>C NMR spectrum of **3k** (100 MHz, MHz, CDCl<sub>3</sub>)

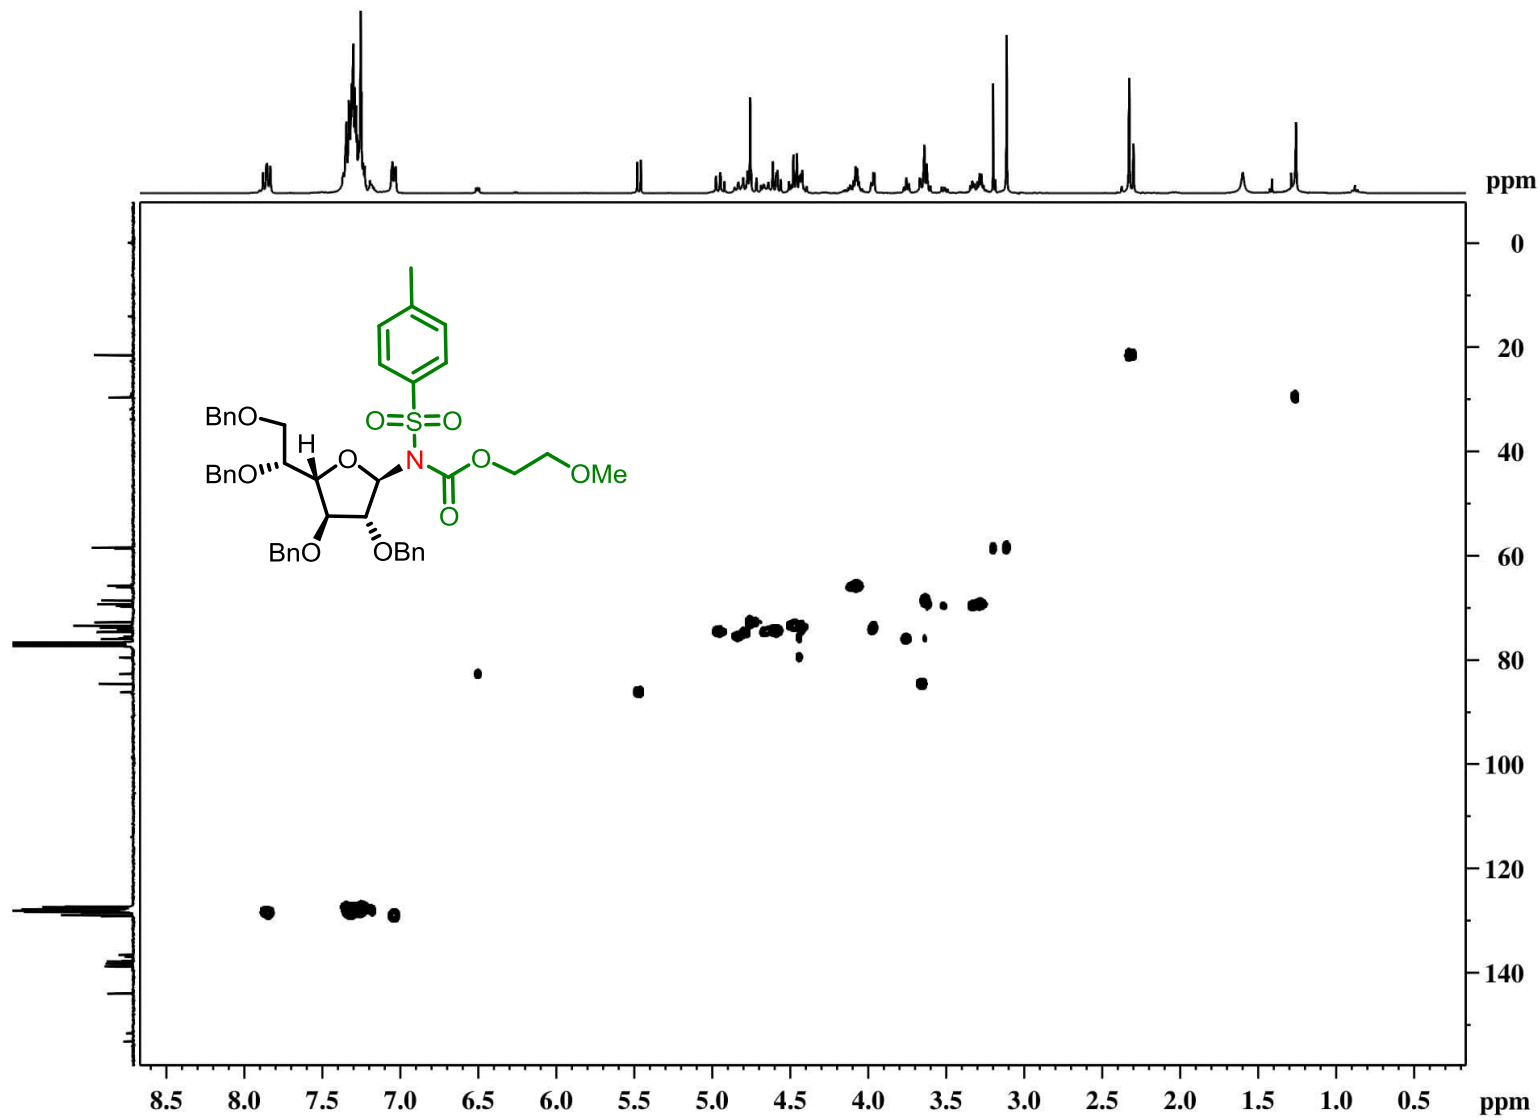

2D HSQC spectrum of **3k** ( $\text{CDCl}_3$ ).

## SAIF [HRMS Report]

|                   |                      |                       |                                |
|-------------------|----------------------|-----------------------|--------------------------------|
| Data File:        | HRMS20I09JUL05       | Original Data Path:   | D:\INTERNAL NEW\2020\July 2020 |
| Sample ID:        | PKM-Gal-03           | Sample Name:          |                                |
| Acquisition Date: | 07/09/20 10:47:56 AM | Run Time(min):        | 0.00                           |
| Vial:             | CSfk1-01:5           | Injection Volume(μl): | 1.00                           |

HRMS20I09JUL05 #13-25 RT: 0.11-0.21 AV: 13 SB: 1 0.01 NL: 3.07E6  
T: FTMS + p ESI Full ms [100.00-1500.00]

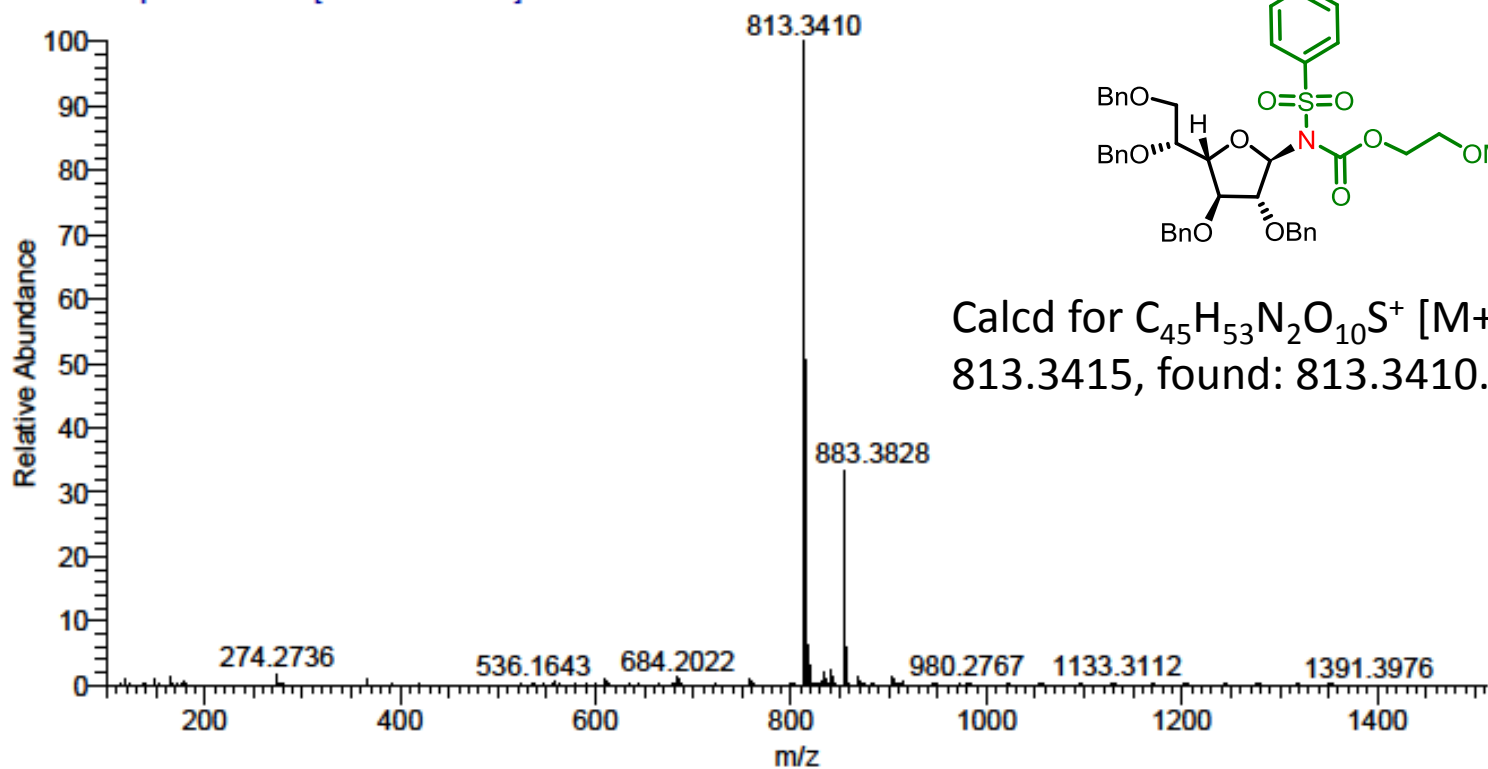

HRMS of **3k**

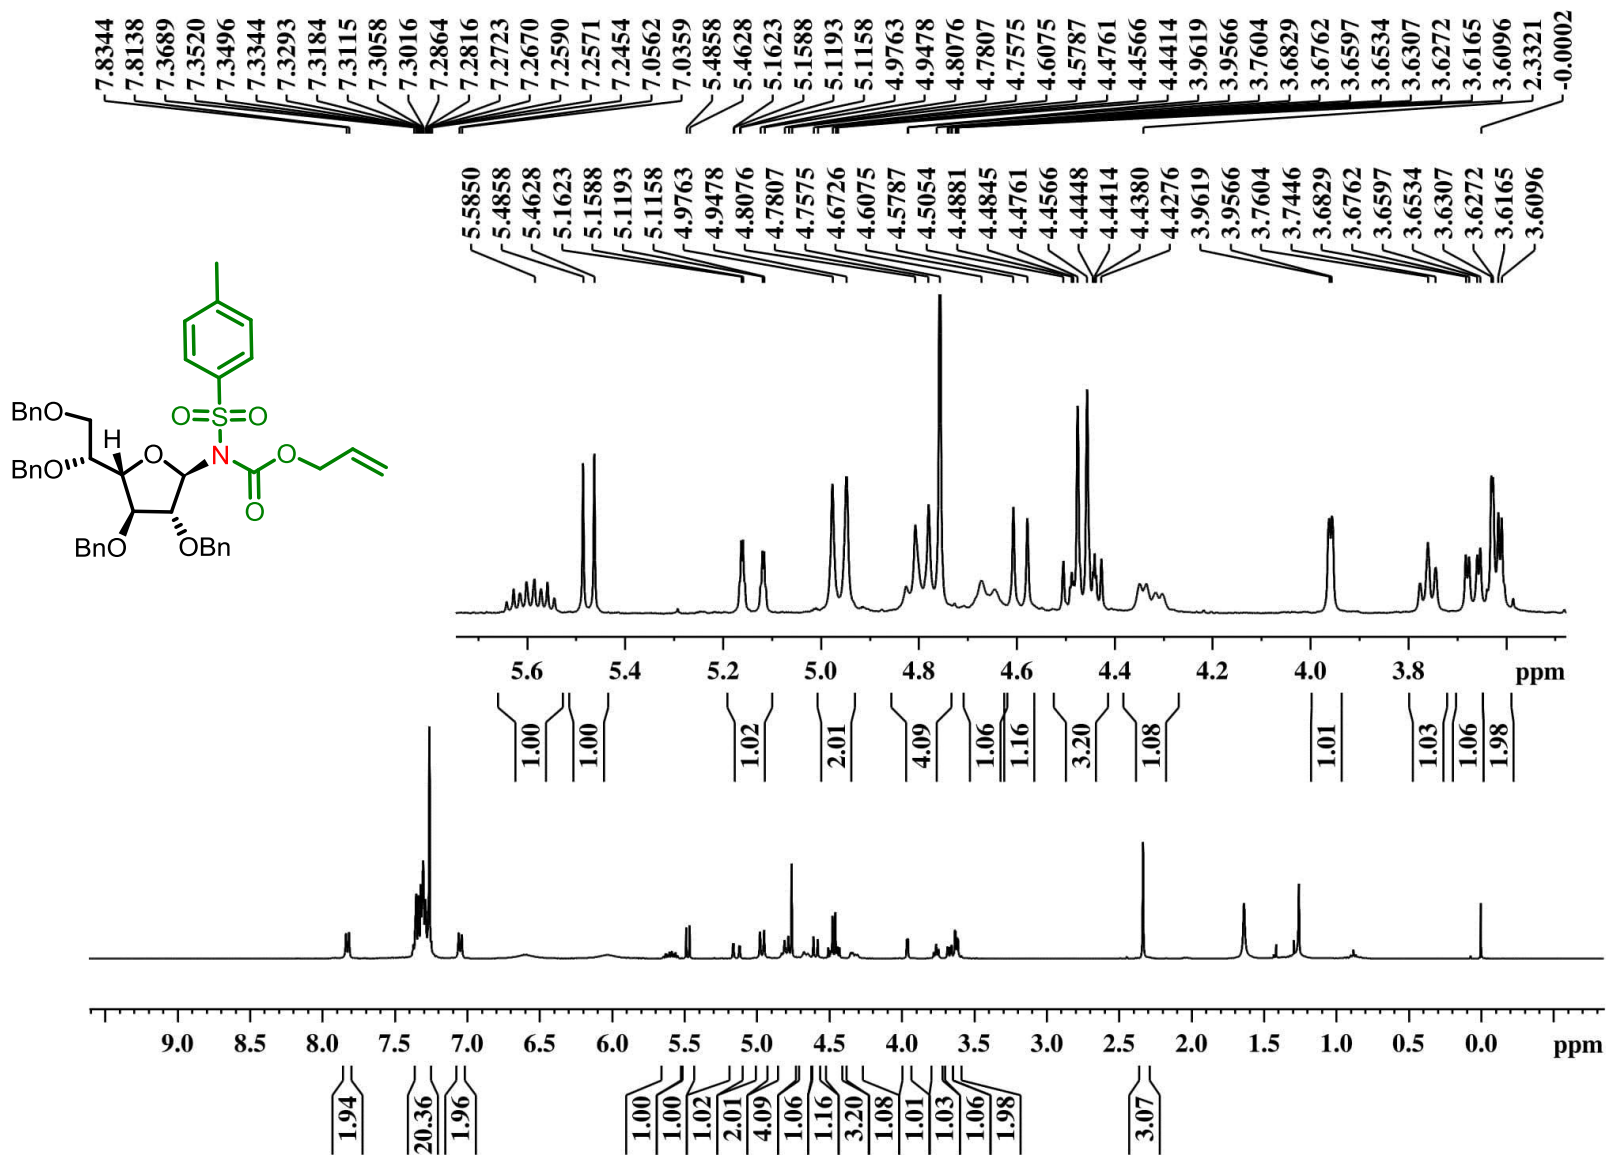

<sup>1</sup>H NMR spectrum of **3I** (400 MHz, CDCl<sub>3</sub>)

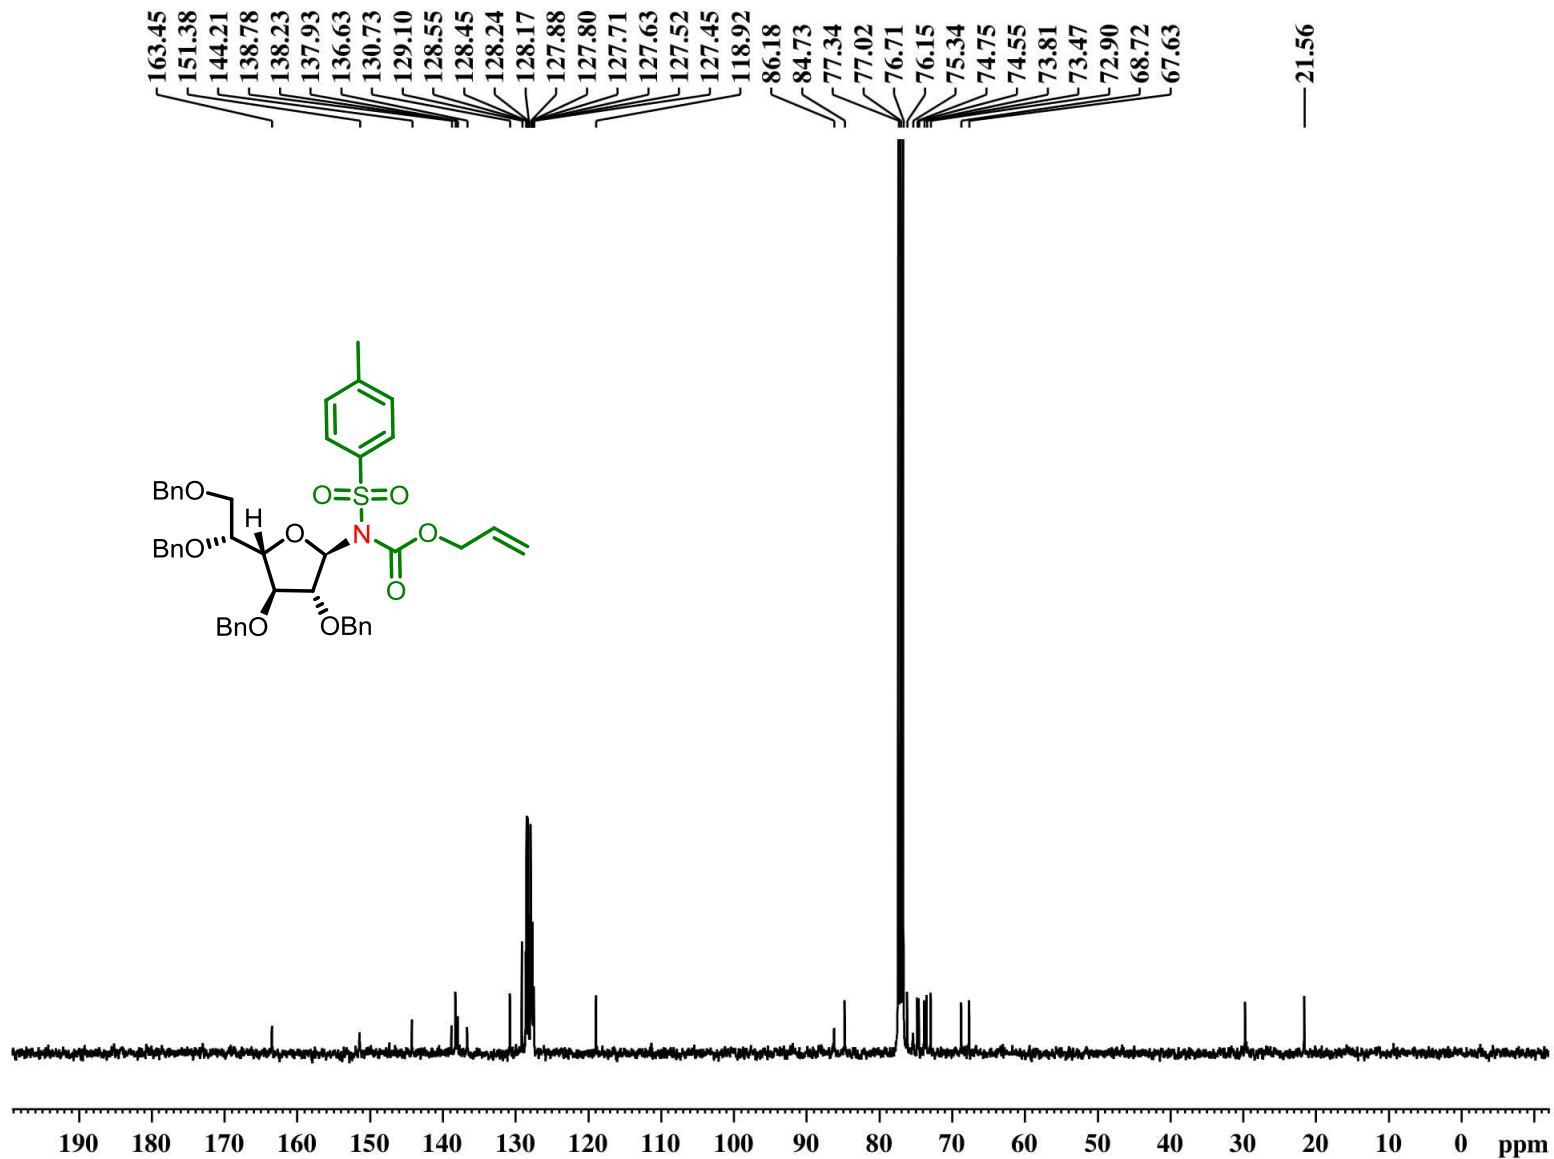

$^{13}\text{C}$  NMR spectrum of **3I** (100 MHz, MHz,  $\text{CDCl}_3$ )

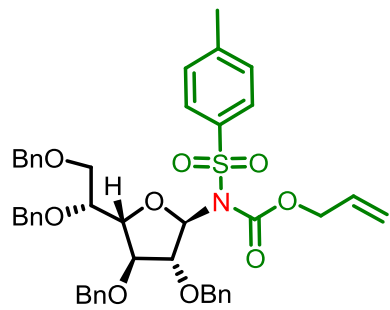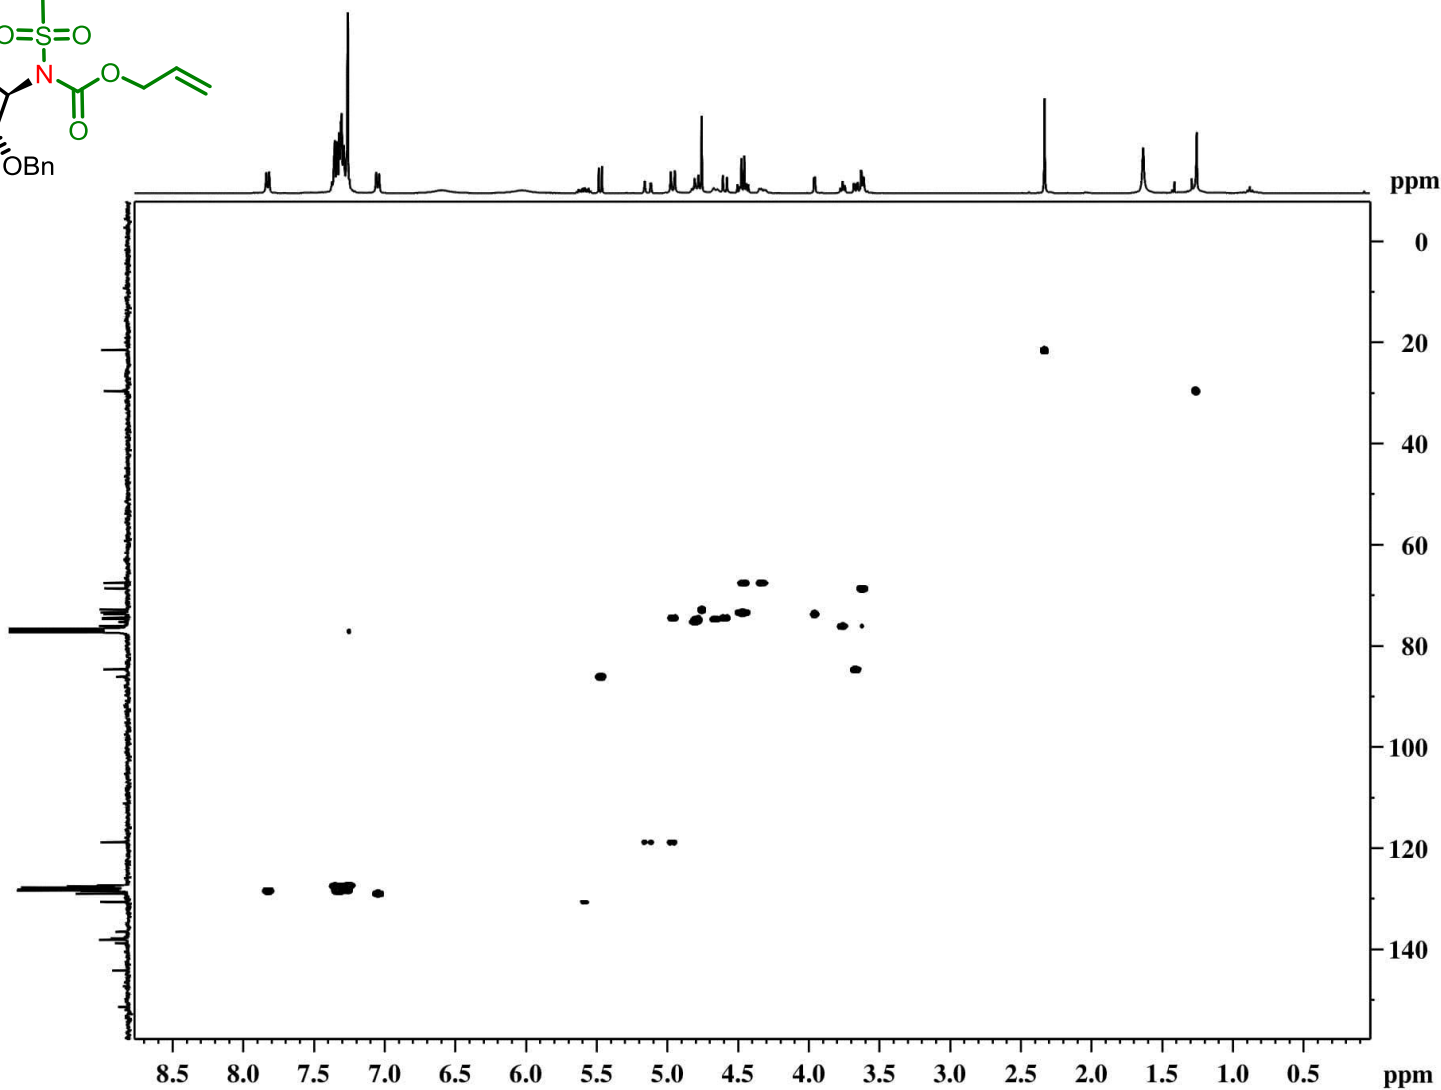

2D HSQC spectrum of **3I**(CDCl<sub>3</sub>).

## SAIF [HRMS Report]

|                   |                      |                       |                                |
|-------------------|----------------------|-----------------------|--------------------------------|
| Data File:        | HRMS20I30JUN08       | Original Data Path:   | D:\INTERNAL NEW\2020\June 2020 |
| Sample ID:        | PKM-TGA-01           | Sample Name:          |                                |
| Acquisition Date: | 06/30/20 12:09:11 PM | Run Time(min):        | 0.00                           |
| Vial:             | CSfk1-01:8           | Injection Volume(μl): | 1.00                           |

HRMS20I30JUN08 #12-25 RT: 0.11-0.21 AV: 14 SB: 1 0.01 NL: 5.87E6  
T: FTMS + p ESI Full ms [100.00-1500.00]

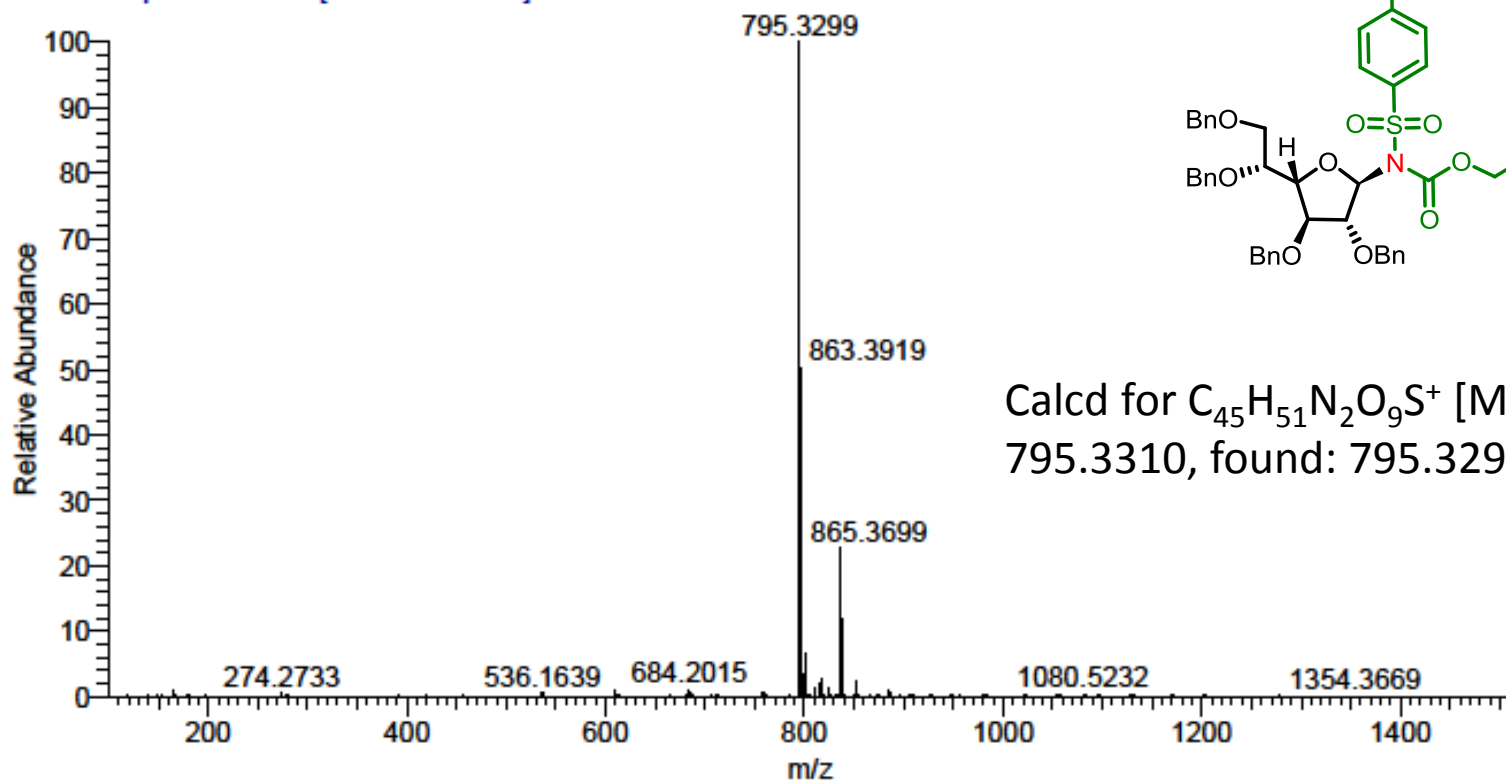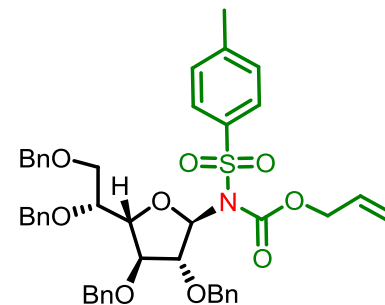

Calcd for  $C_{45}H_{51}N_2O_9S^+ [M+NH_4]^+$ :  
795.3310, found: 795.3299.

HRMS of **3I**



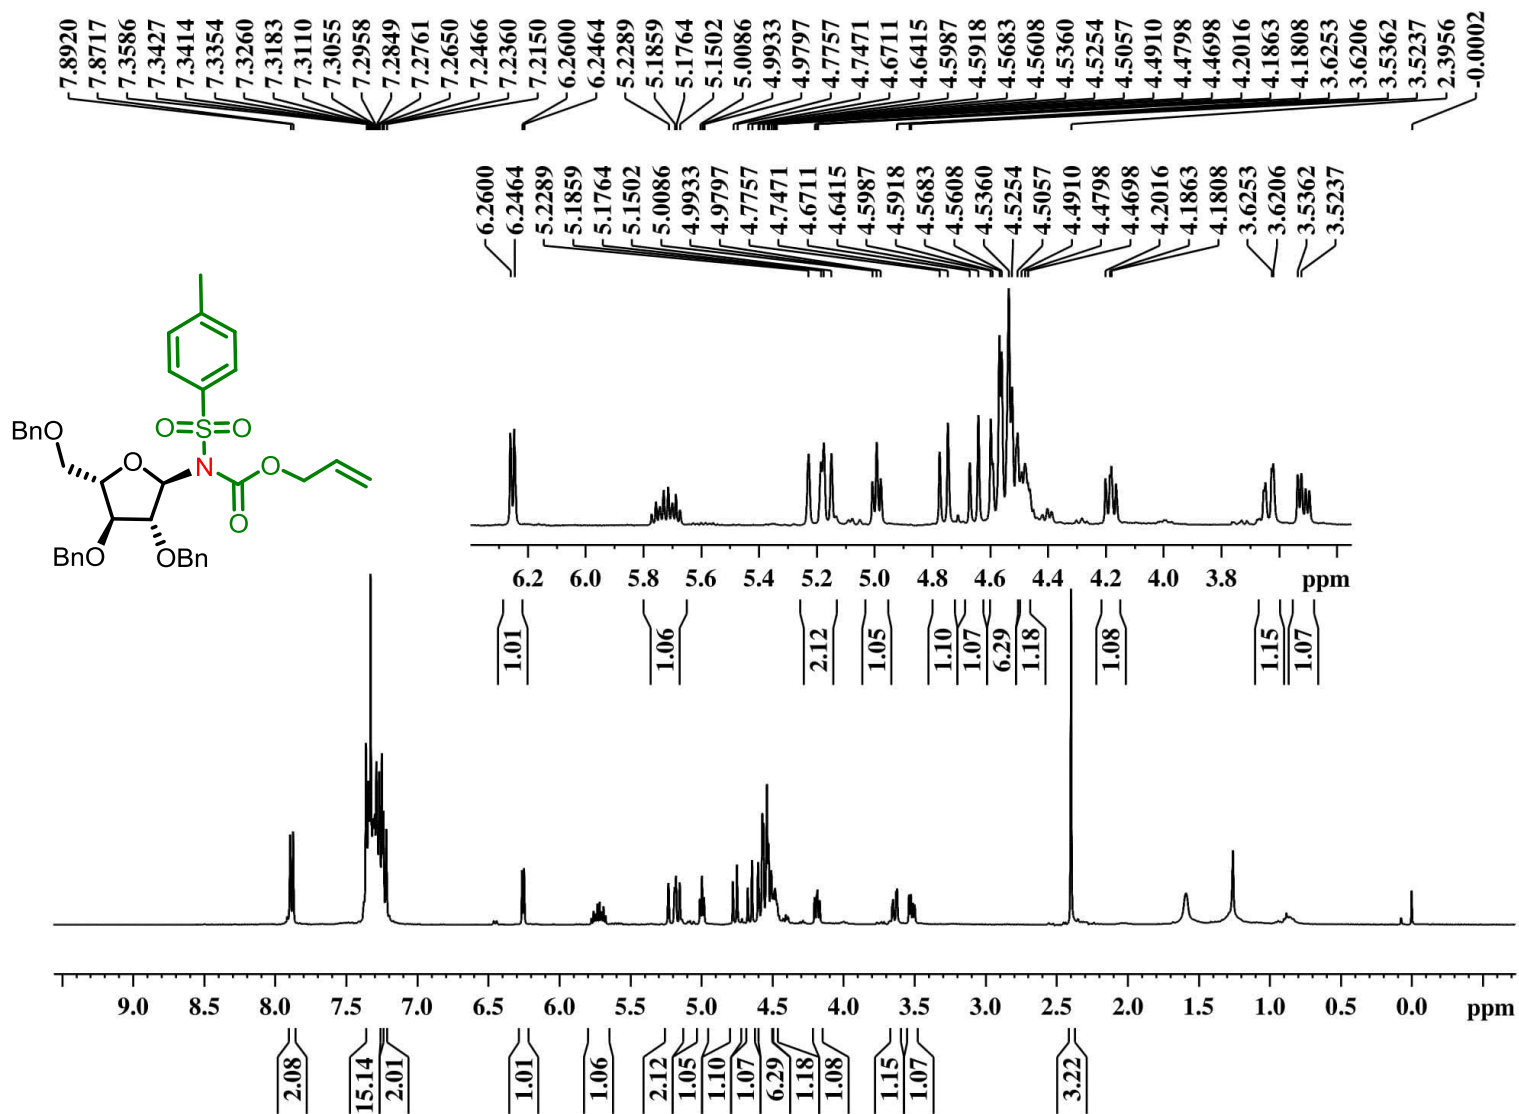

<sup>1</sup>H NMR spectrum of **3m** (400 MHz, CDCl<sub>3</sub>)

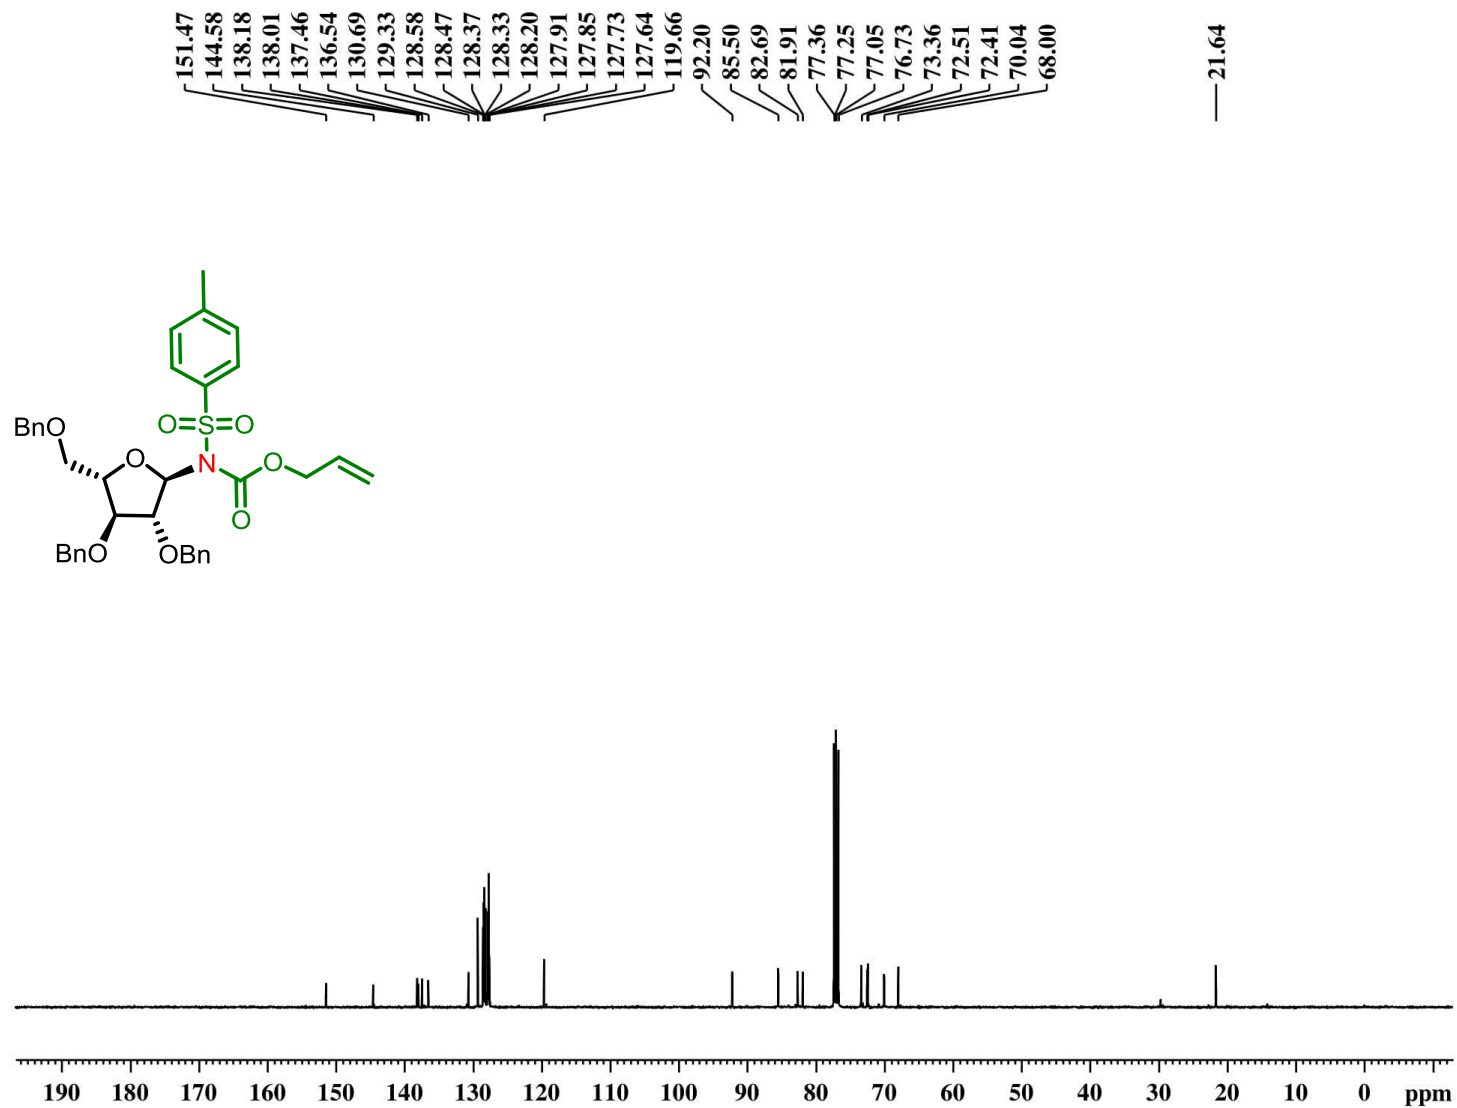

<sup>13</sup>C NMR spectrum of **3m** (100 MHz, MHz, CDCl<sub>3</sub>)

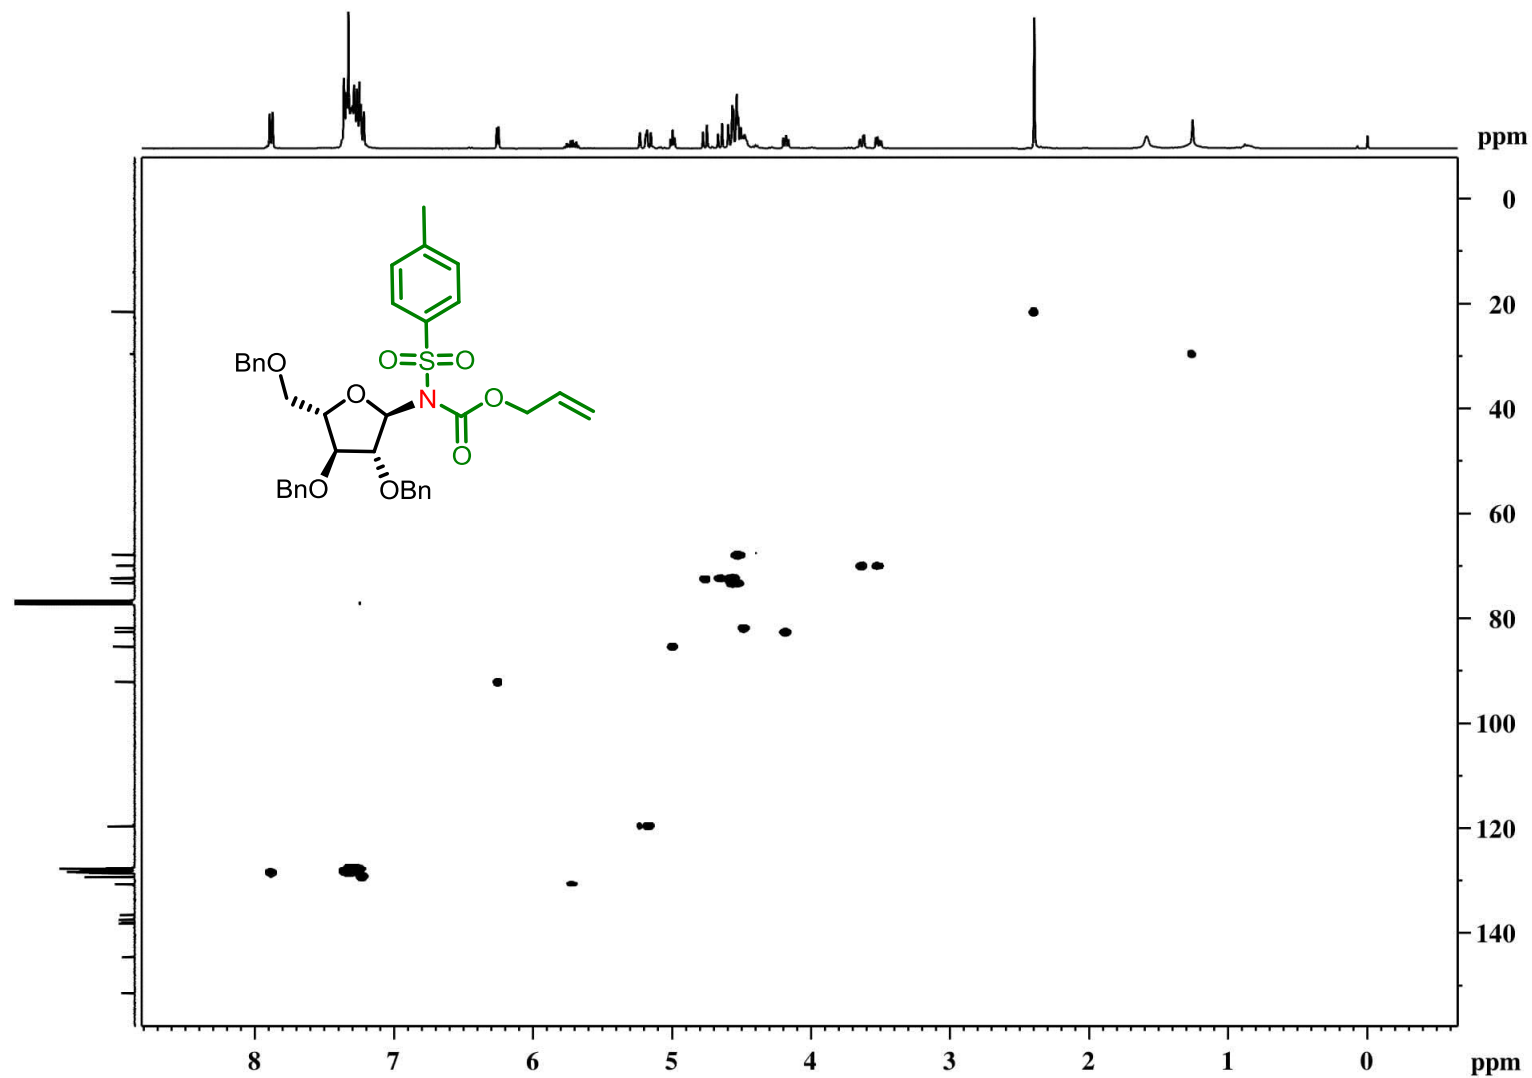

2D HSQC spectrum of **3m** (CDCl<sub>3</sub>).

## SAIF [HRMS Report]

|                   |                      |                       |                                  |
|-------------------|----------------------|-----------------------|----------------------------------|
| Data File:        | HRMS20I06OCT15       | Original Data Path:   | D:\INTERNAL NEW\2020\OCT<br>2020 |
| Sample ID:        | PKM-LAf-03           | Sample Name:          |                                  |
| Acquisition Date: | 10/06/20 11:46:48 AM | Run Time(min):        | 0.00                             |
| Vial:             | CStk1-01:15          | Injection Volume(μl): | 1.00                             |

HRMS20I06OCT15 #12-25 RT: 0.12-0.21 AV: 14 SB: 1 0.01 NL: 2.02E7  
T: FTMS + p ESI Full ms [100.00-1500.00]

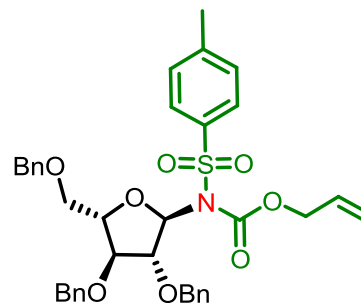

Calcd for  $C_{37}H_{43}N_2O_8S^+$   $[M+NH_4]^+$ : 675.2735,  
found: 675.2716.

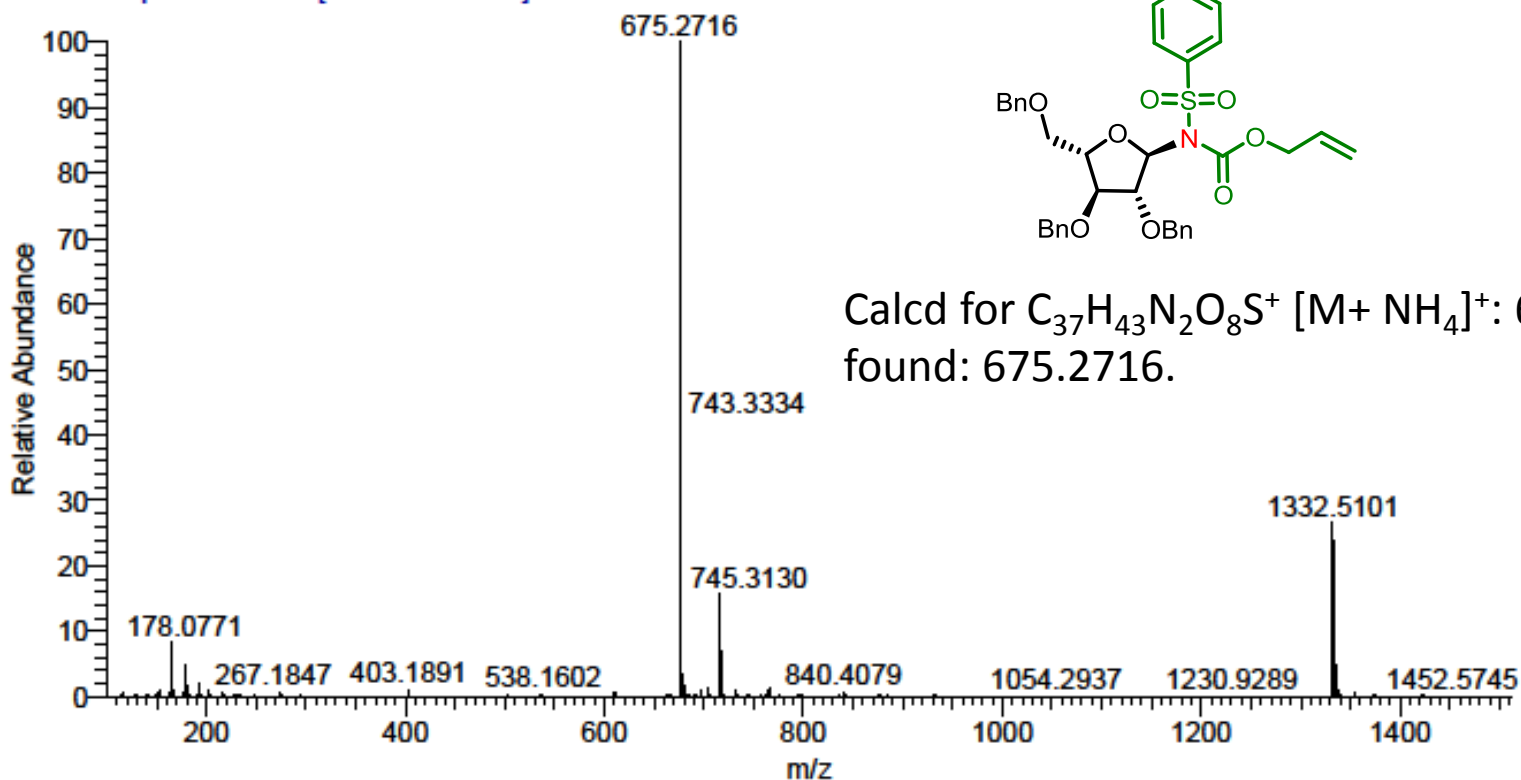

HRMS of **3m**

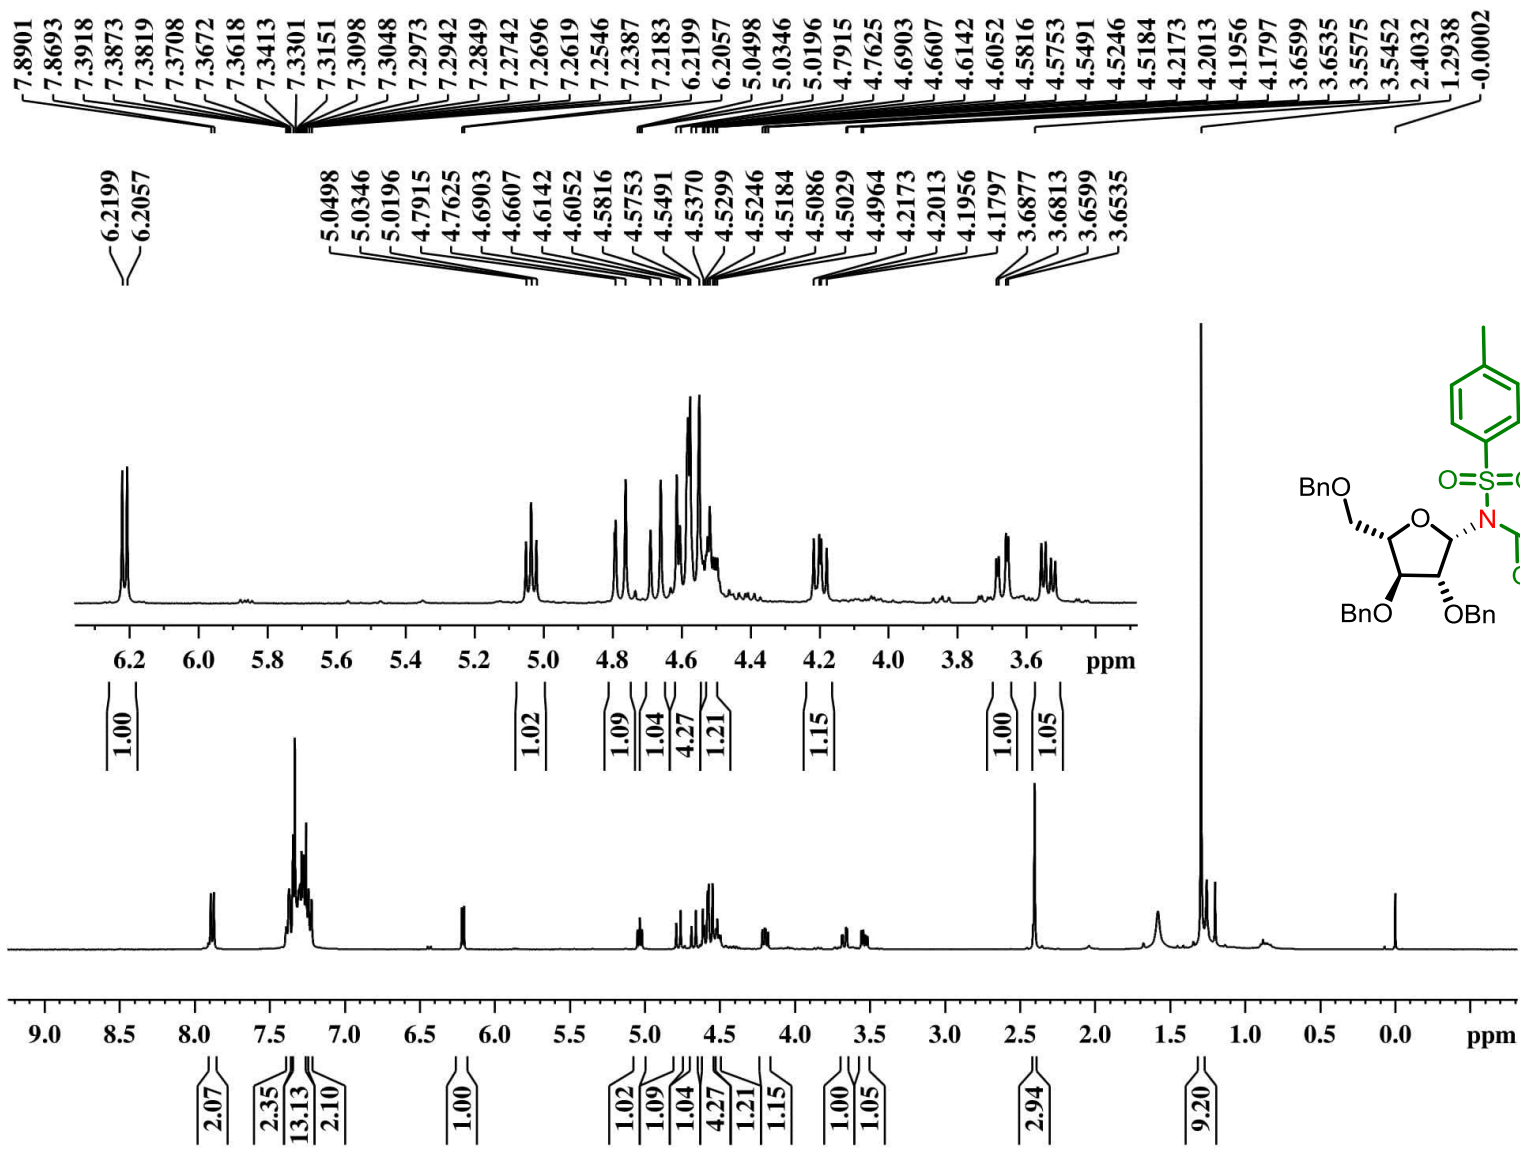

$^1\text{H}$  NMR spectrum of **3n** (400 MHz,  $\text{CDCl}_3$ )

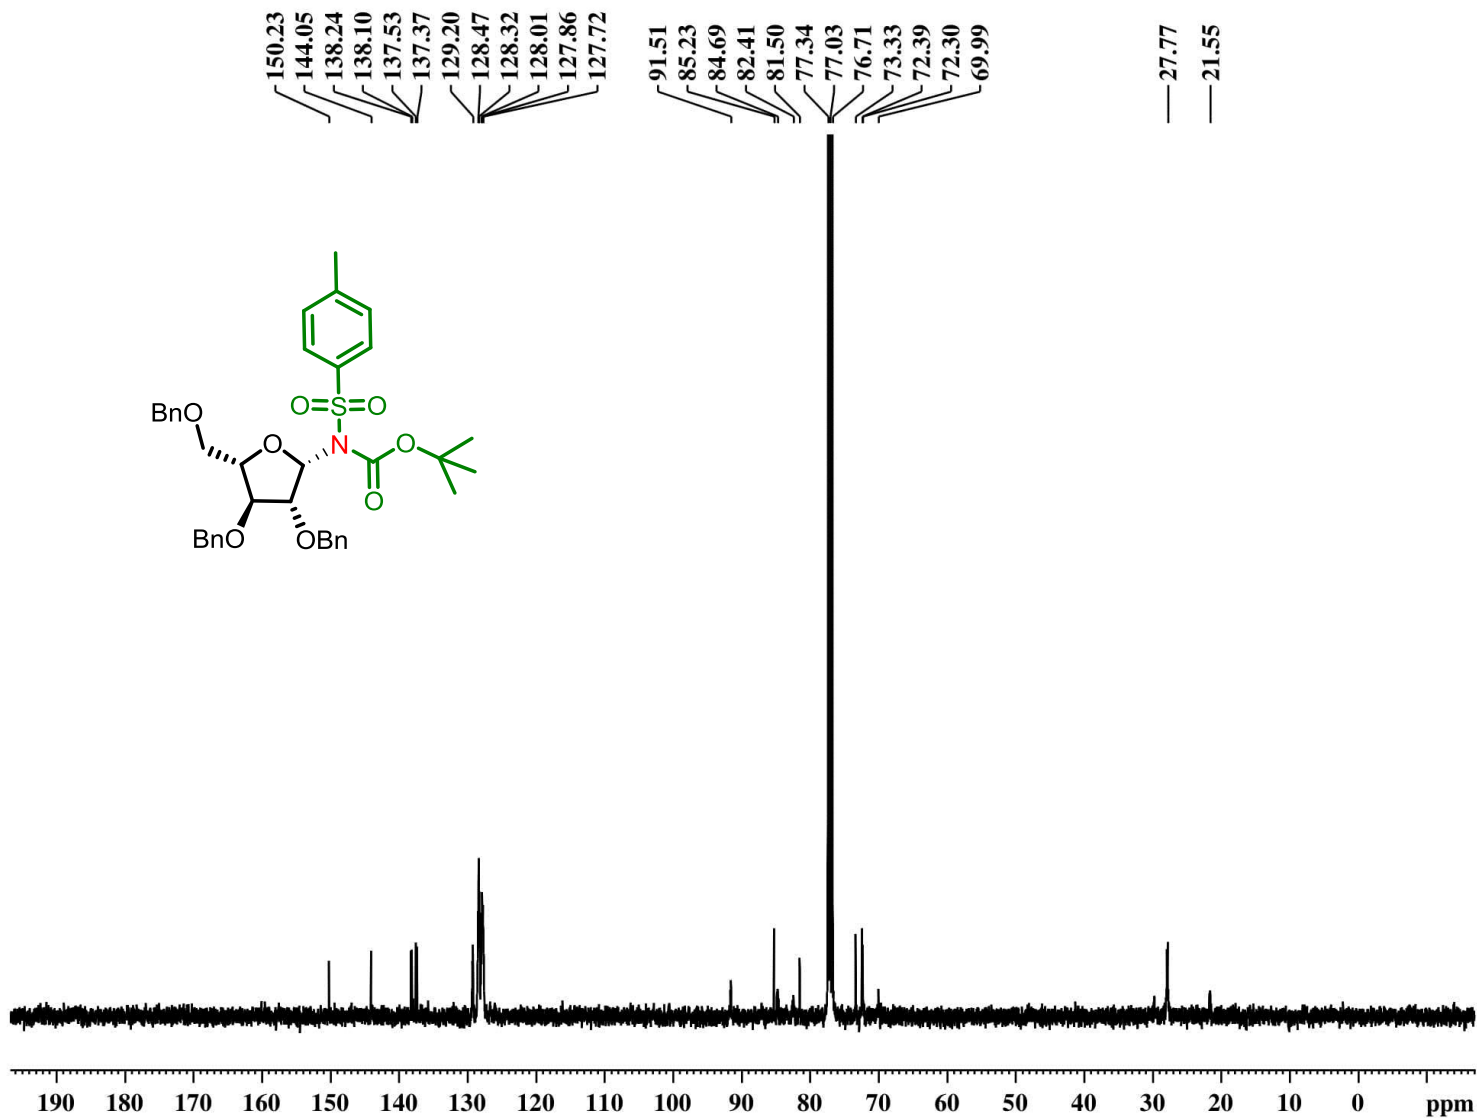

<sup>13</sup>C NMR spectrum of **3n** (100 MHz, MHz, CDCl<sub>3</sub>)

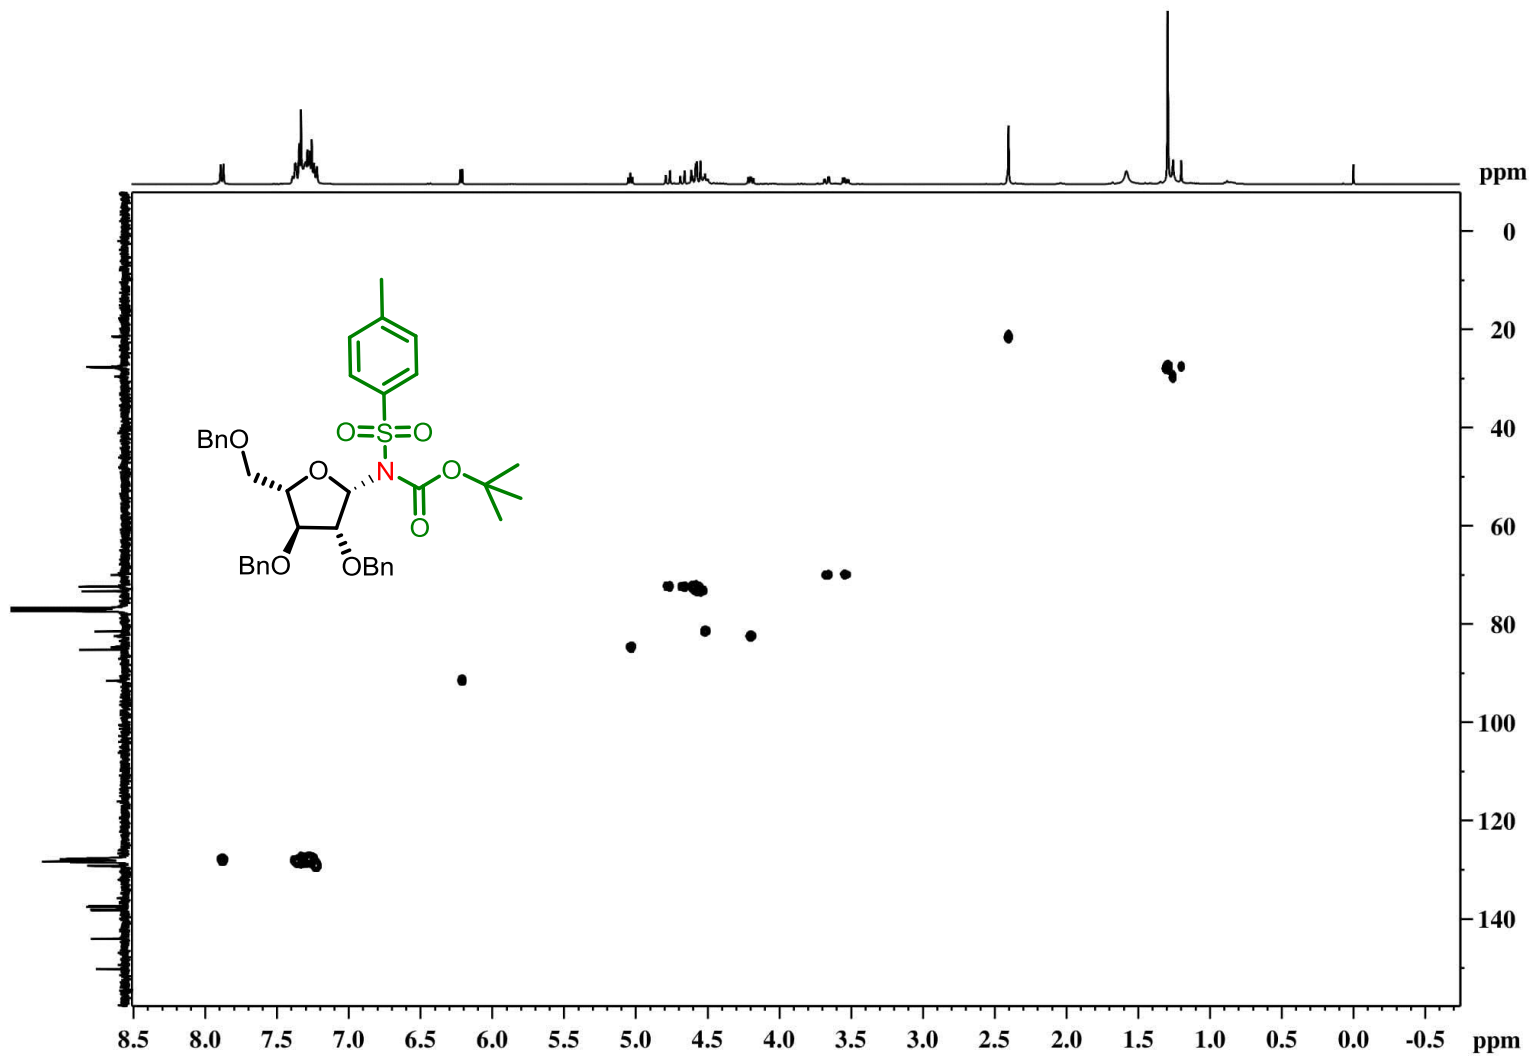

2D HSQC spectrum of **3n**(CDCl<sub>3</sub>).

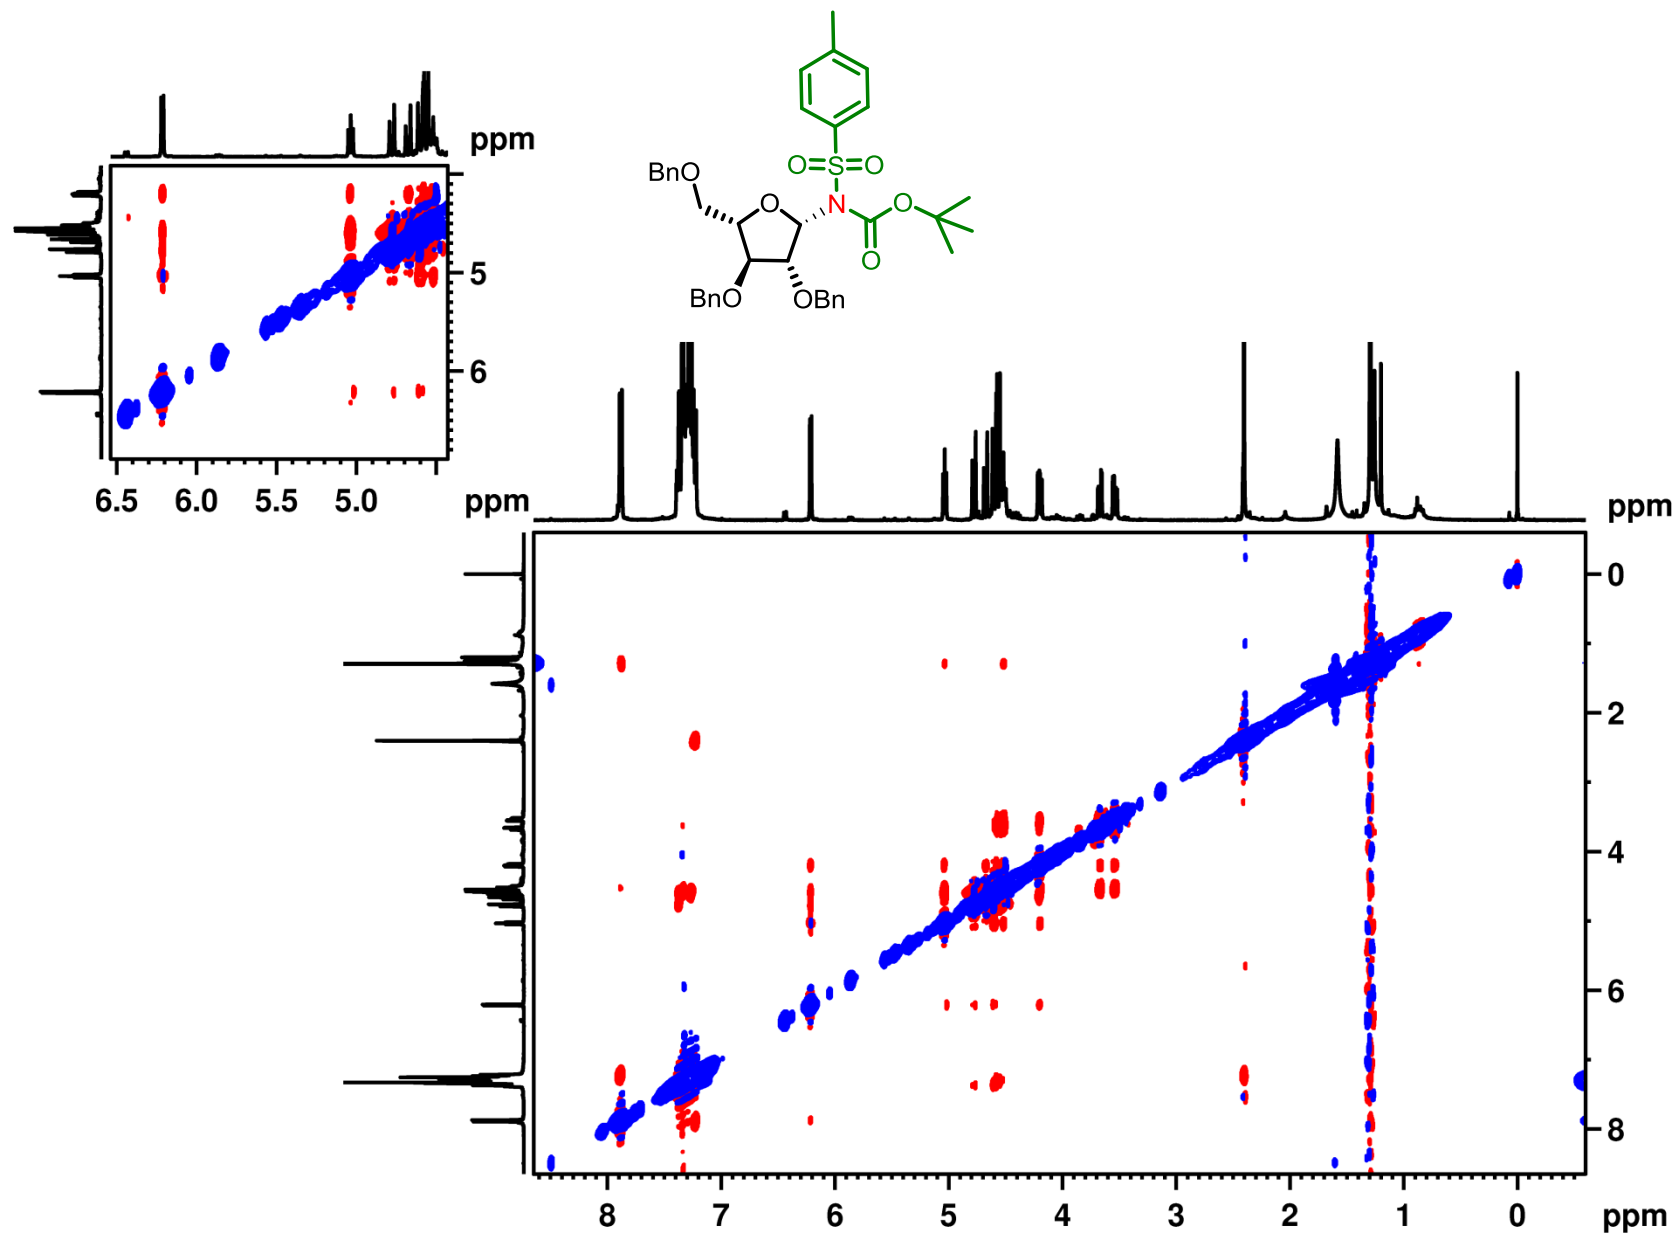

2D NOESY spectrum of **3n** (CDCl<sub>3</sub>).



## SAIF [HRMS Report]

|                   |                      |                       |                               |
|-------------------|----------------------|-----------------------|-------------------------------|
| Data File:        | HRMS20I05OCT36       | Original Data Path:   | D:\INTERNAL NEW\2020\OCT 2020 |
| Sample ID:        | PKM-LAf-02           | Sample Name:          |                               |
| Acquisition Date: | 10/05/20 03:54:02 PM | Run Time(min):        | 0.00                          |
| Vial:             | CStk1-01:36          | Injection Volume(μl): | 1.00                          |

HRMS20I05OCT36 #12-23 RT: 0.11-0.21 AV: 12 SB: 1 0.01 NL: 1.09E6  
T: FTMS + p ESI Full ms [100.00-1500.00]

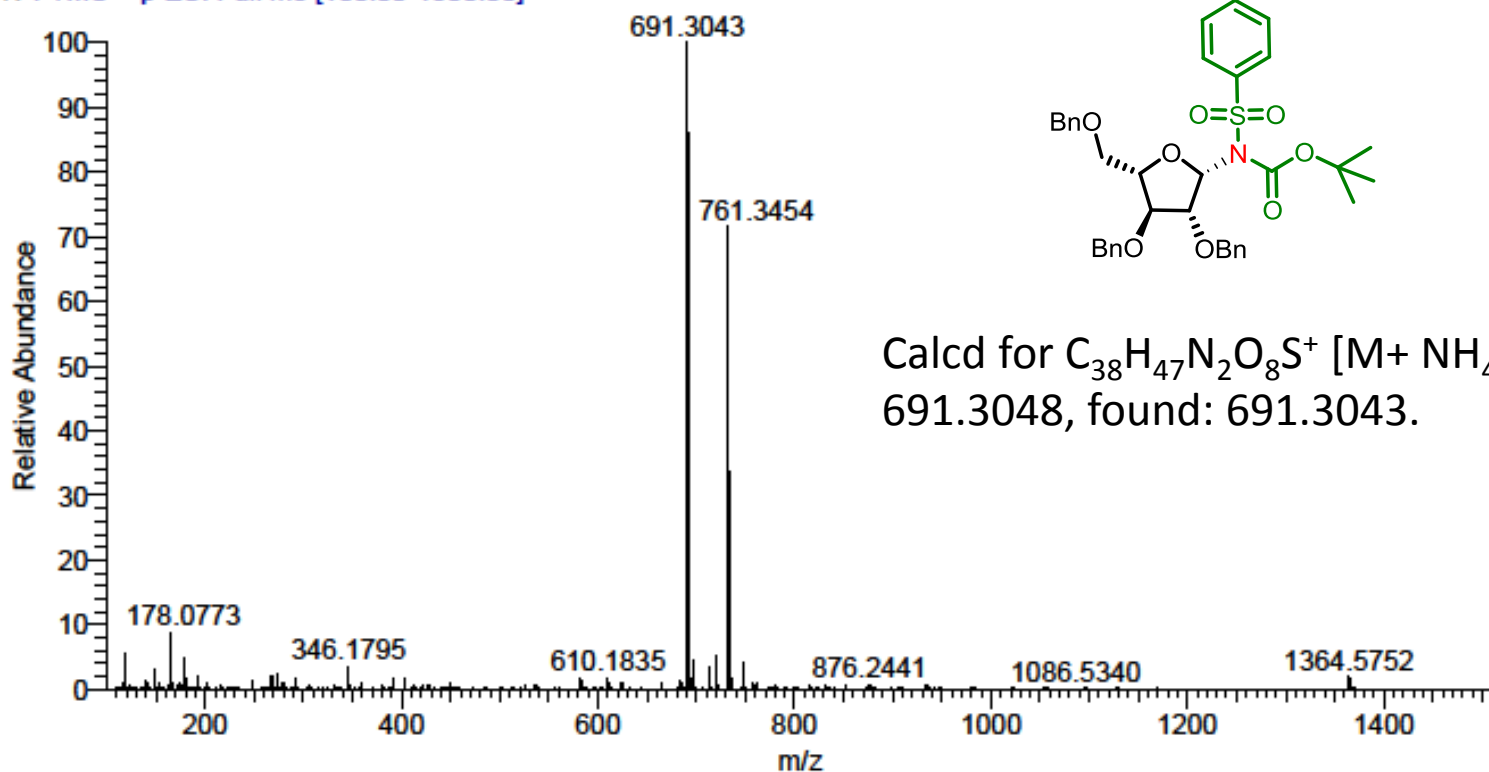

HRMS of **3n**

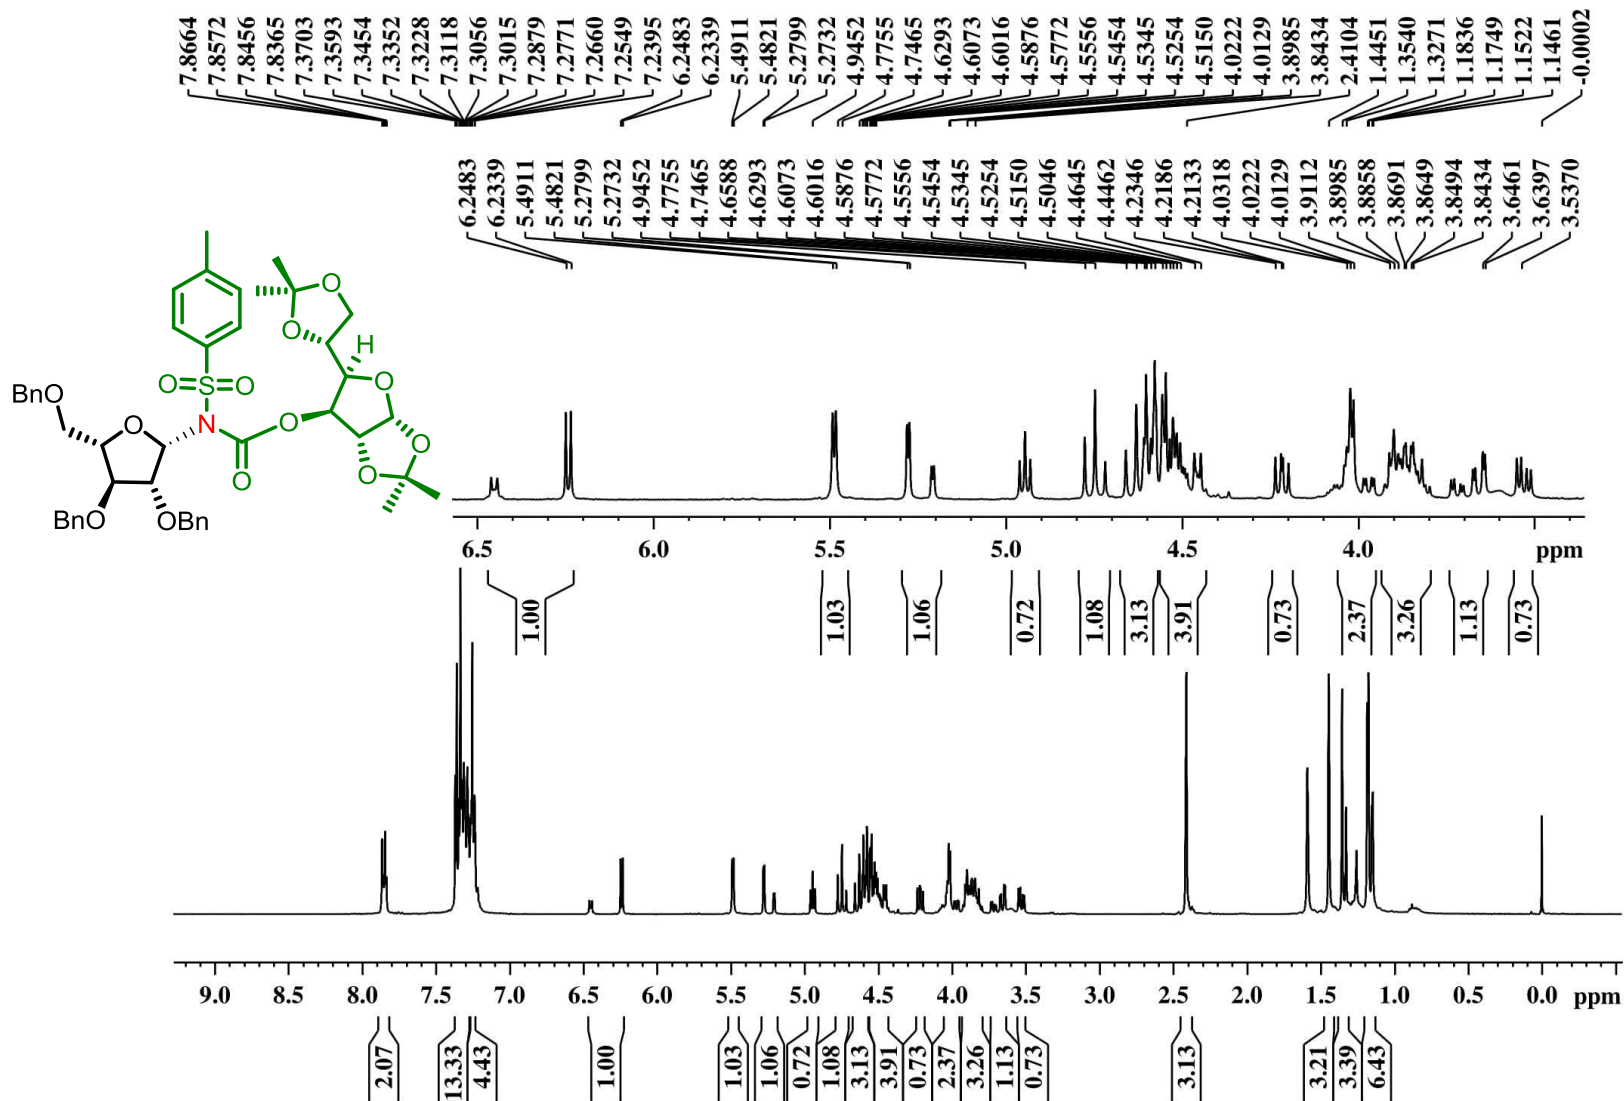

<sup>1</sup>H NMR spectrum of **3o** (400 MHz, CDCl<sub>3</sub>)

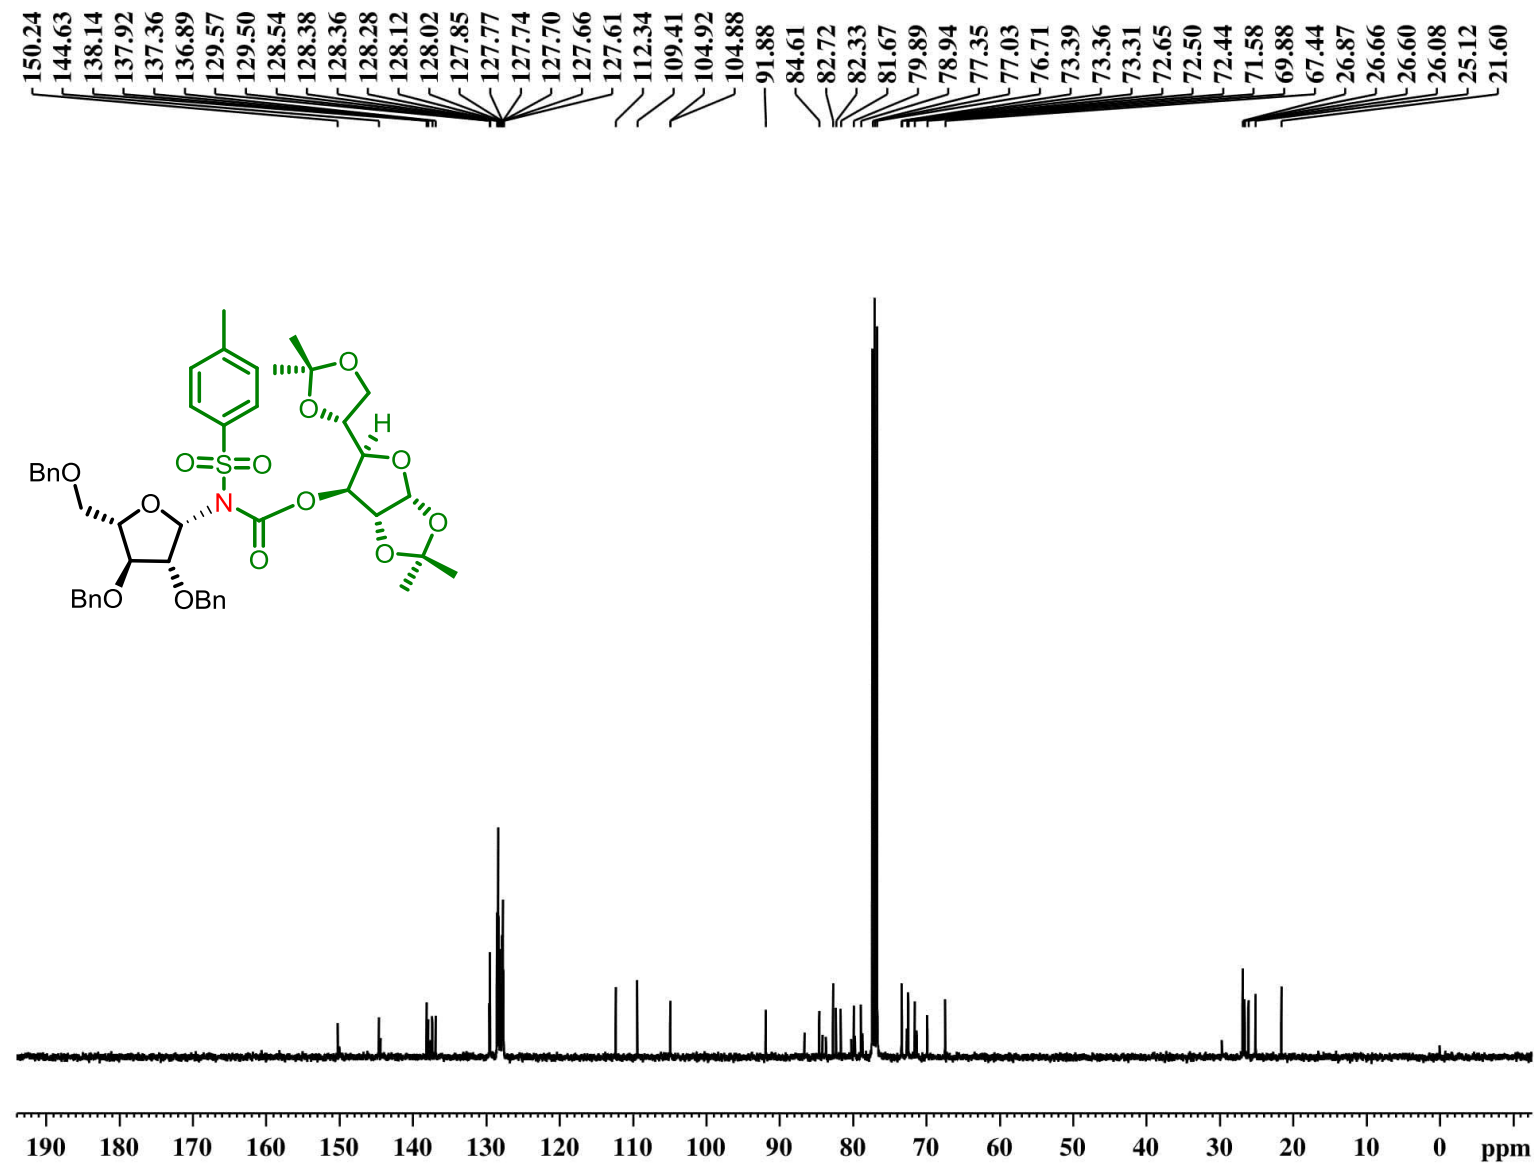

<sup>13</sup>C NMR spectrum of **3o** (100 MHz, MHz, CDCl<sub>3</sub>)

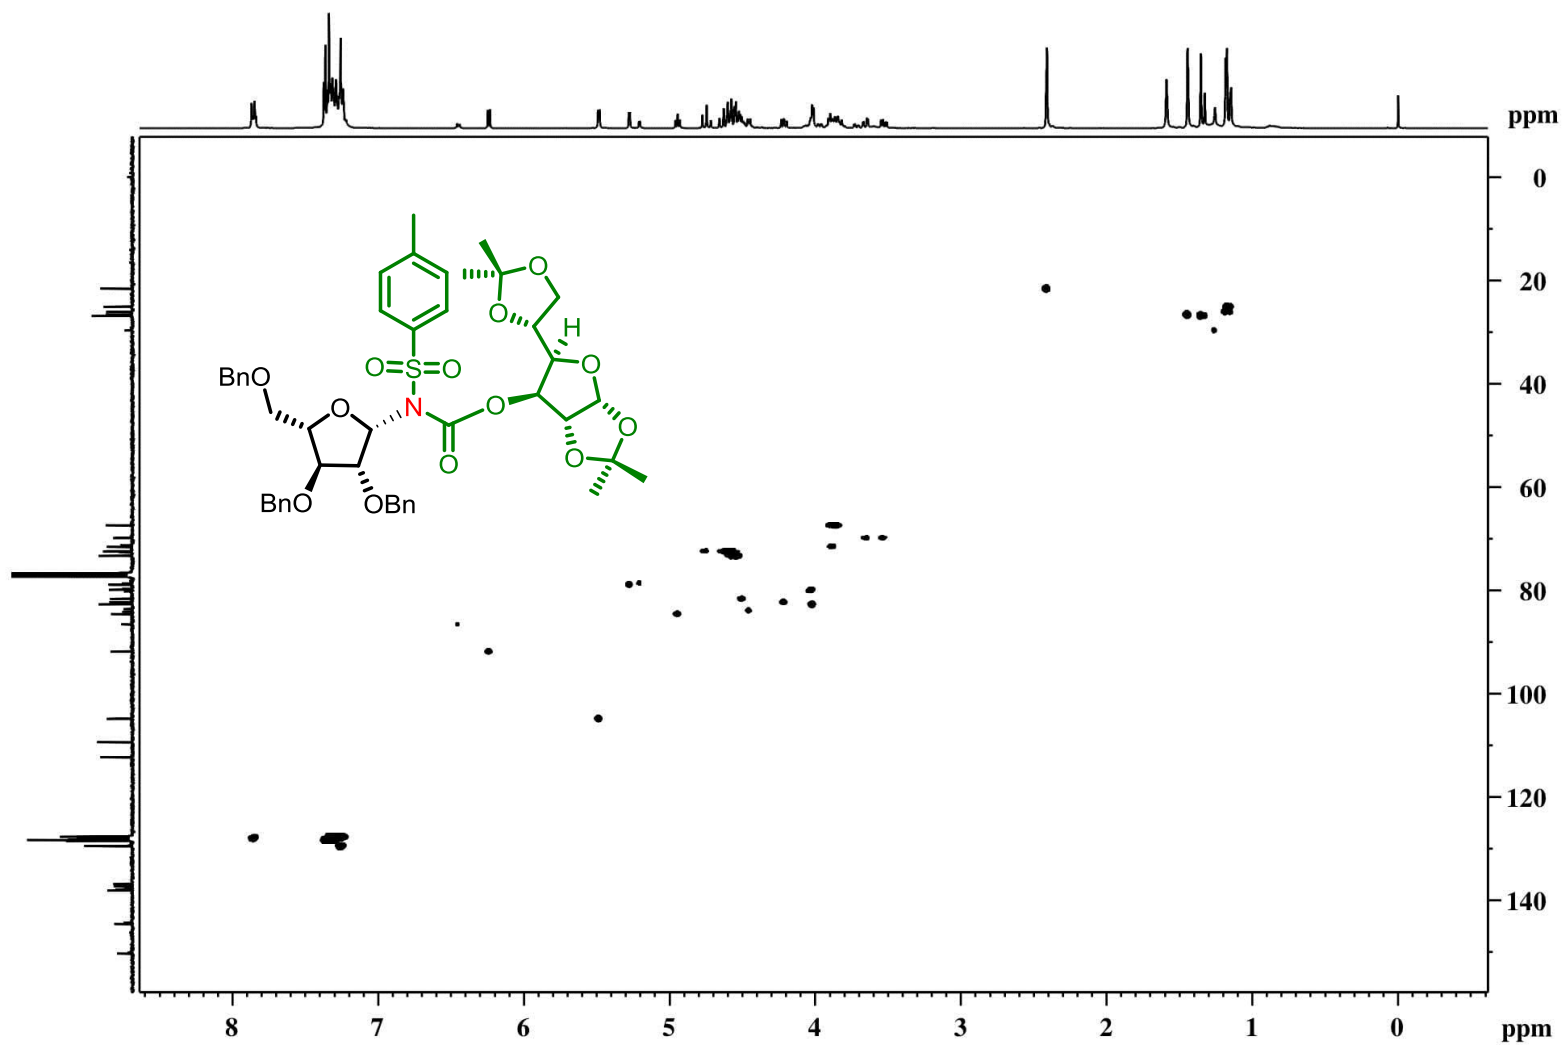

## SAIF [HRMS Report]

|                   |                      |                       |                               |
|-------------------|----------------------|-----------------------|-------------------------------|
| Data File:        | HRMS20I06OCT14       | Original Data Path:   | D:\INTERNAL NEW\2020\OCT 2020 |
| Sample ID:        | PKM-LAf-04           | Sample Name:          |                               |
| Acquisition Date: | 10/06/20 11:44:49 AM | Run Time(min):        | 0.00                          |
| Vial:             | CStk1-01:14          | Injection Volume(ul): | 1.00                          |

HRMS20I06OCT14 #11-24 RT: 0.11-0.21 AV: 14 SB: 1 0.01 NL: 1.63E7  
T: FTMS + p ESI Full ms [100.00-1500.00]

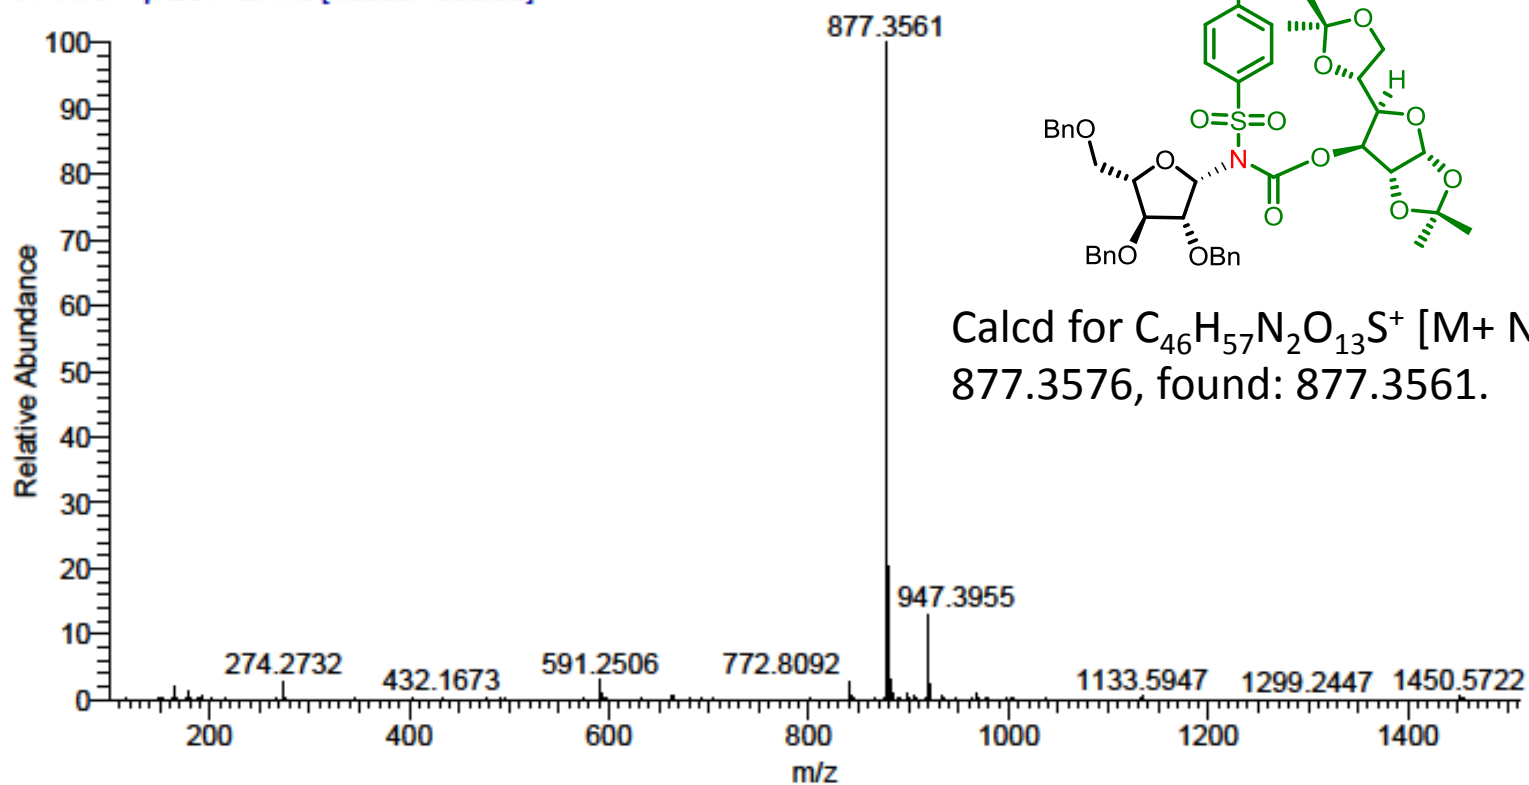

HRMS of **3o**

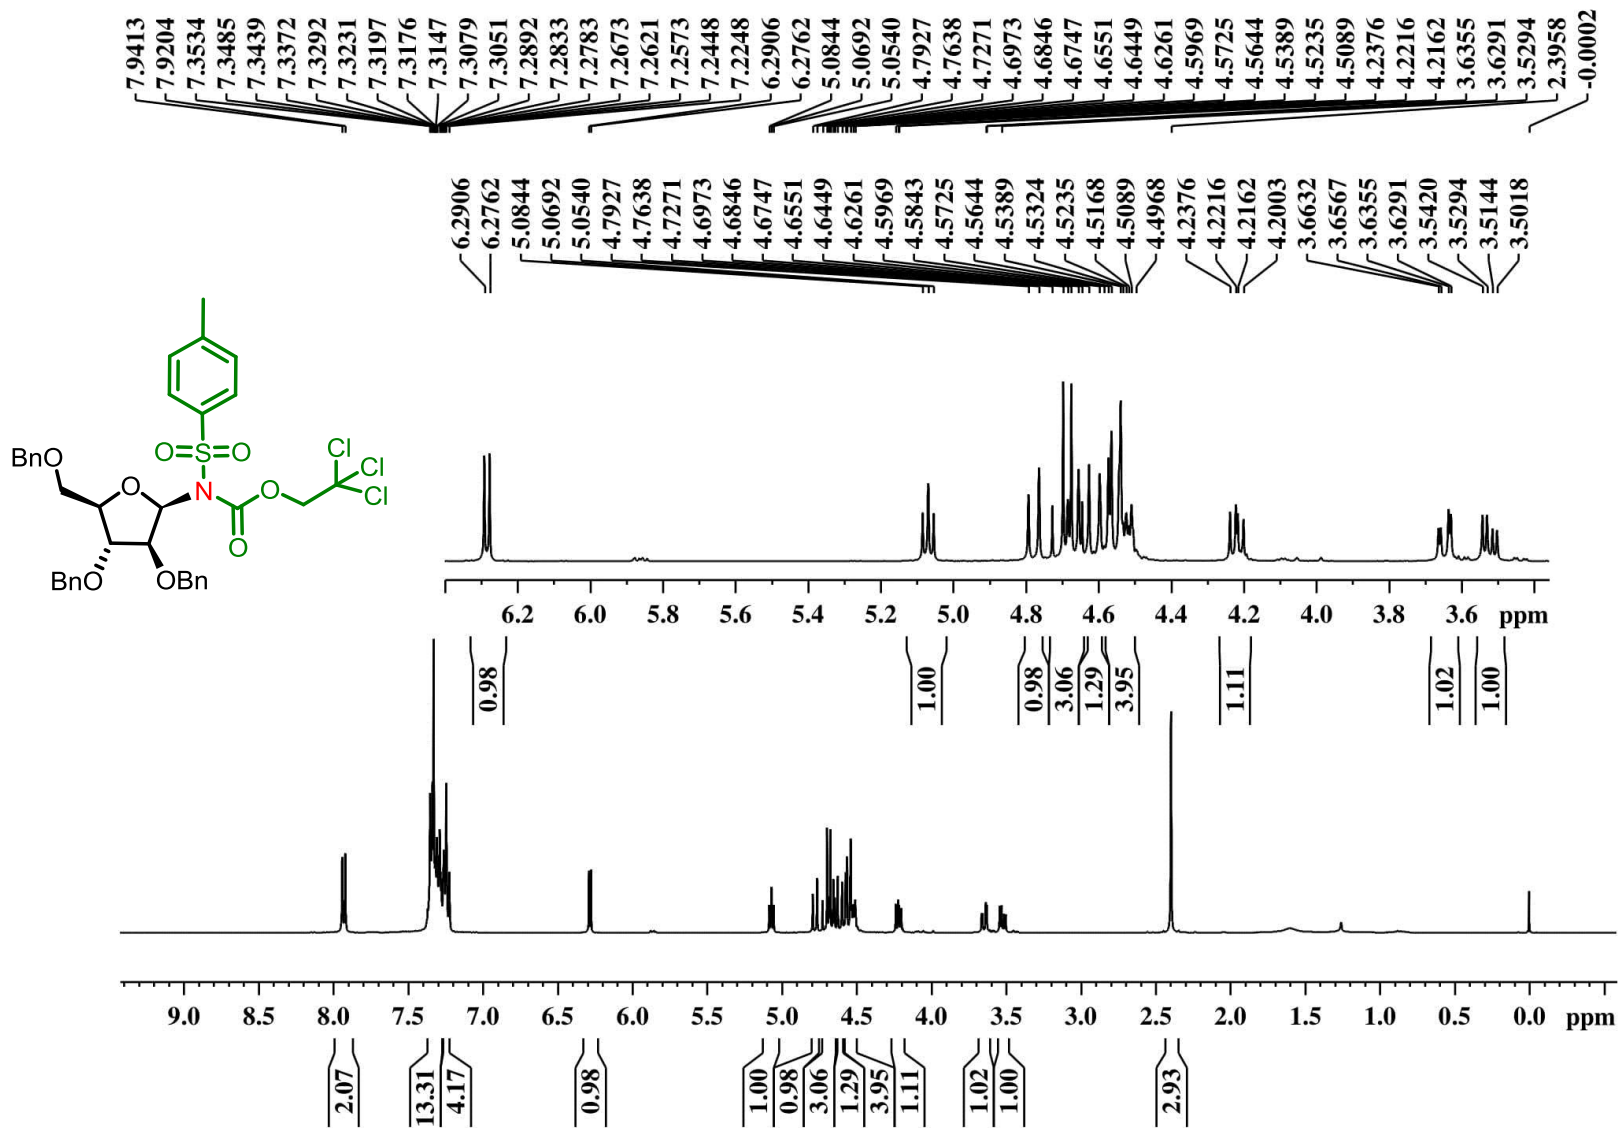

<sup>1</sup>H NMR spectrum of **3p** (400 MHz, CDCl<sub>3</sub>)

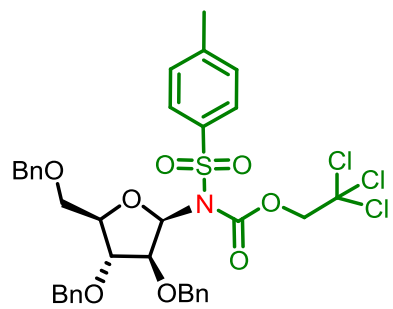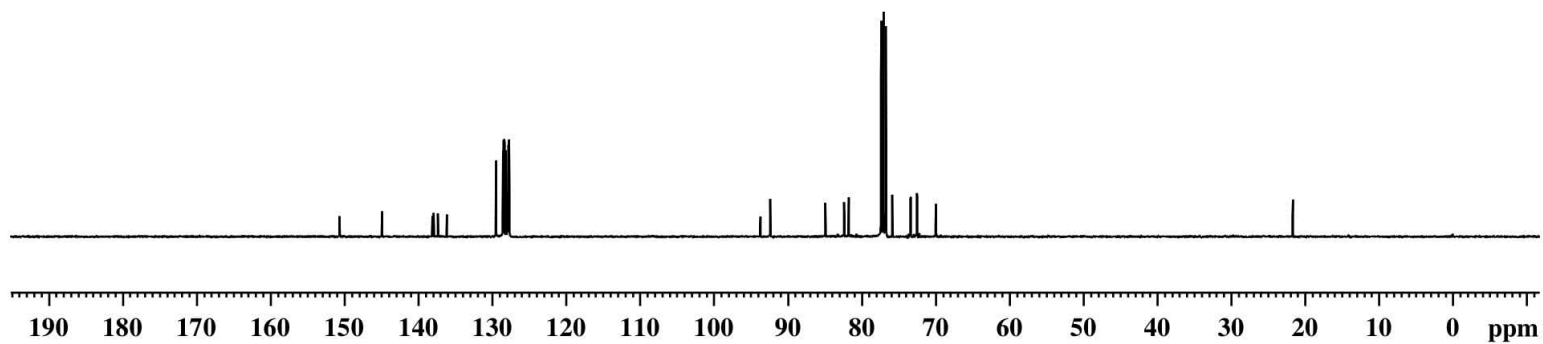

150.70  
144.94  
138.12  
137.94  
137.38  
136.15  
129.50  
128.57  
128.51  
128.40  
128.37  
128.17  
127.96  
127.85  
127.76  
127.74  
127.68  
92.38  
84.94  
82.38  
81.78  
77.37  
77.05  
76.74  
75.87  
73.39  
72.55  
72.52  
69.98

— 21.67

$^{13}\text{C}$  NMR spectrum of **3p** (100 MHz,  $\text{CDCl}_3$ )

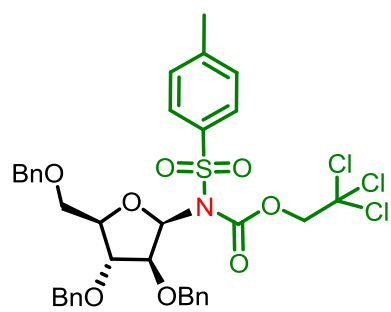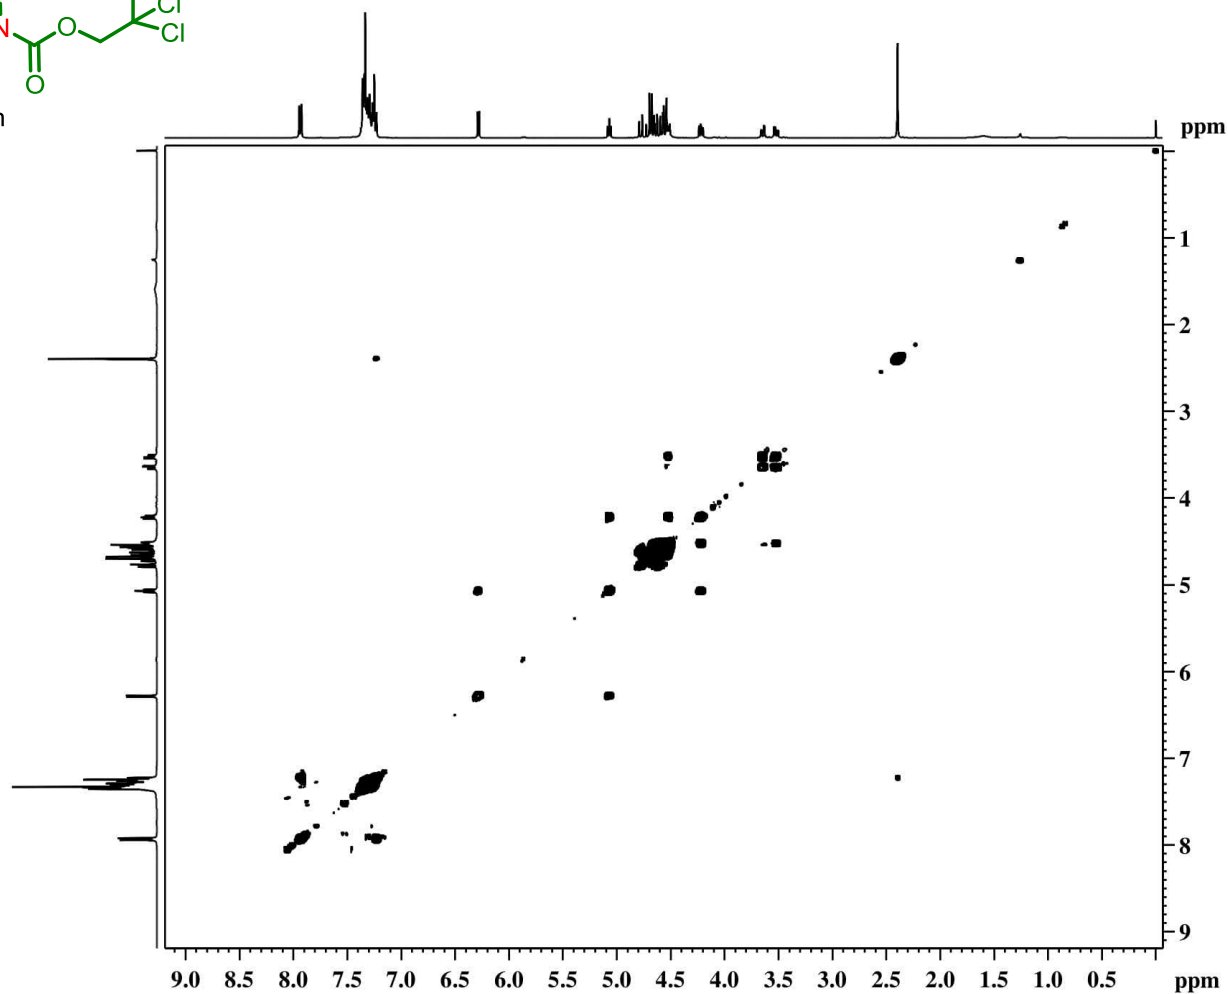

2D COSY spectrum of **3p** (CDCl<sub>3</sub>).



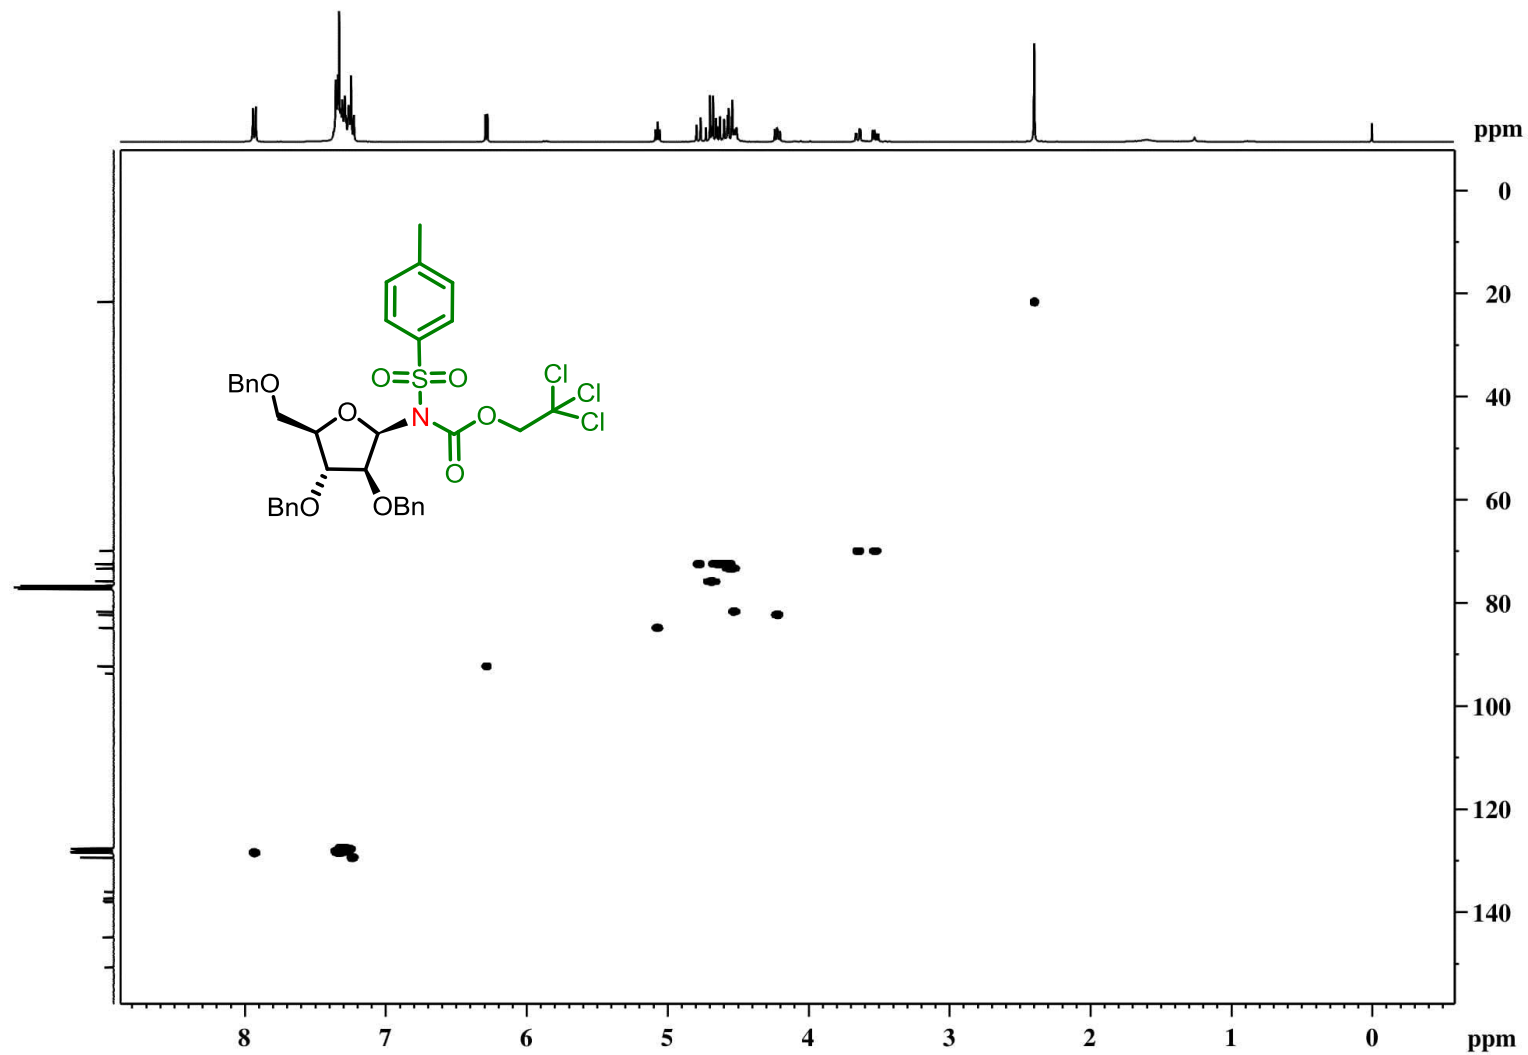

2D HSQC spectrum of **3p** ( $\text{CDCl}_3$ ).

HRMS20113JUL39 #17-27 RT: 0.16-0.24 AV: 11 SB: 7 0.02-0.08 NL: 4.92E5  
T: FTMS + p ESI Full ms [100.00-1500.00]

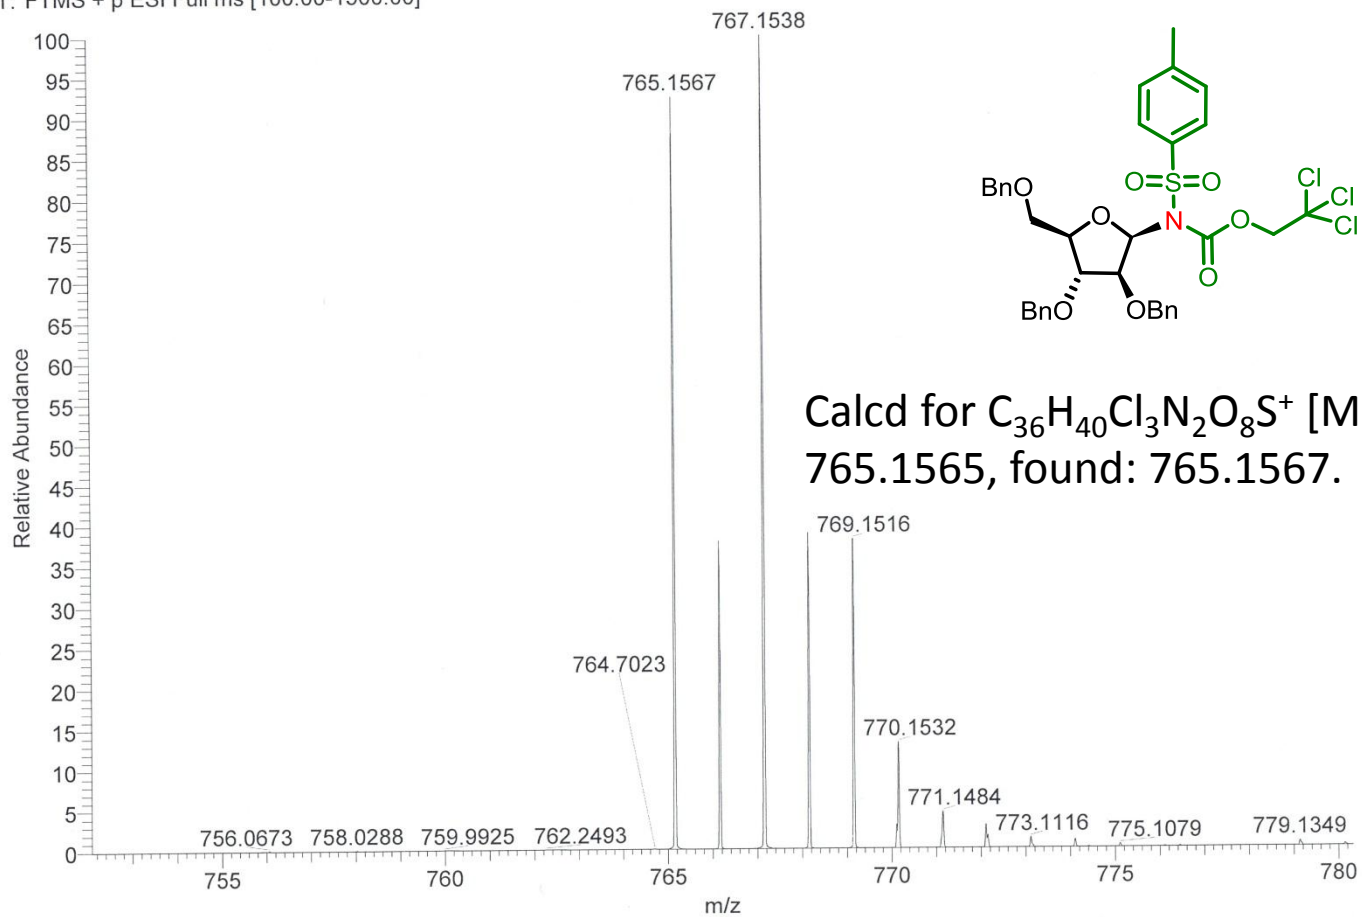

HRMS of **3p**

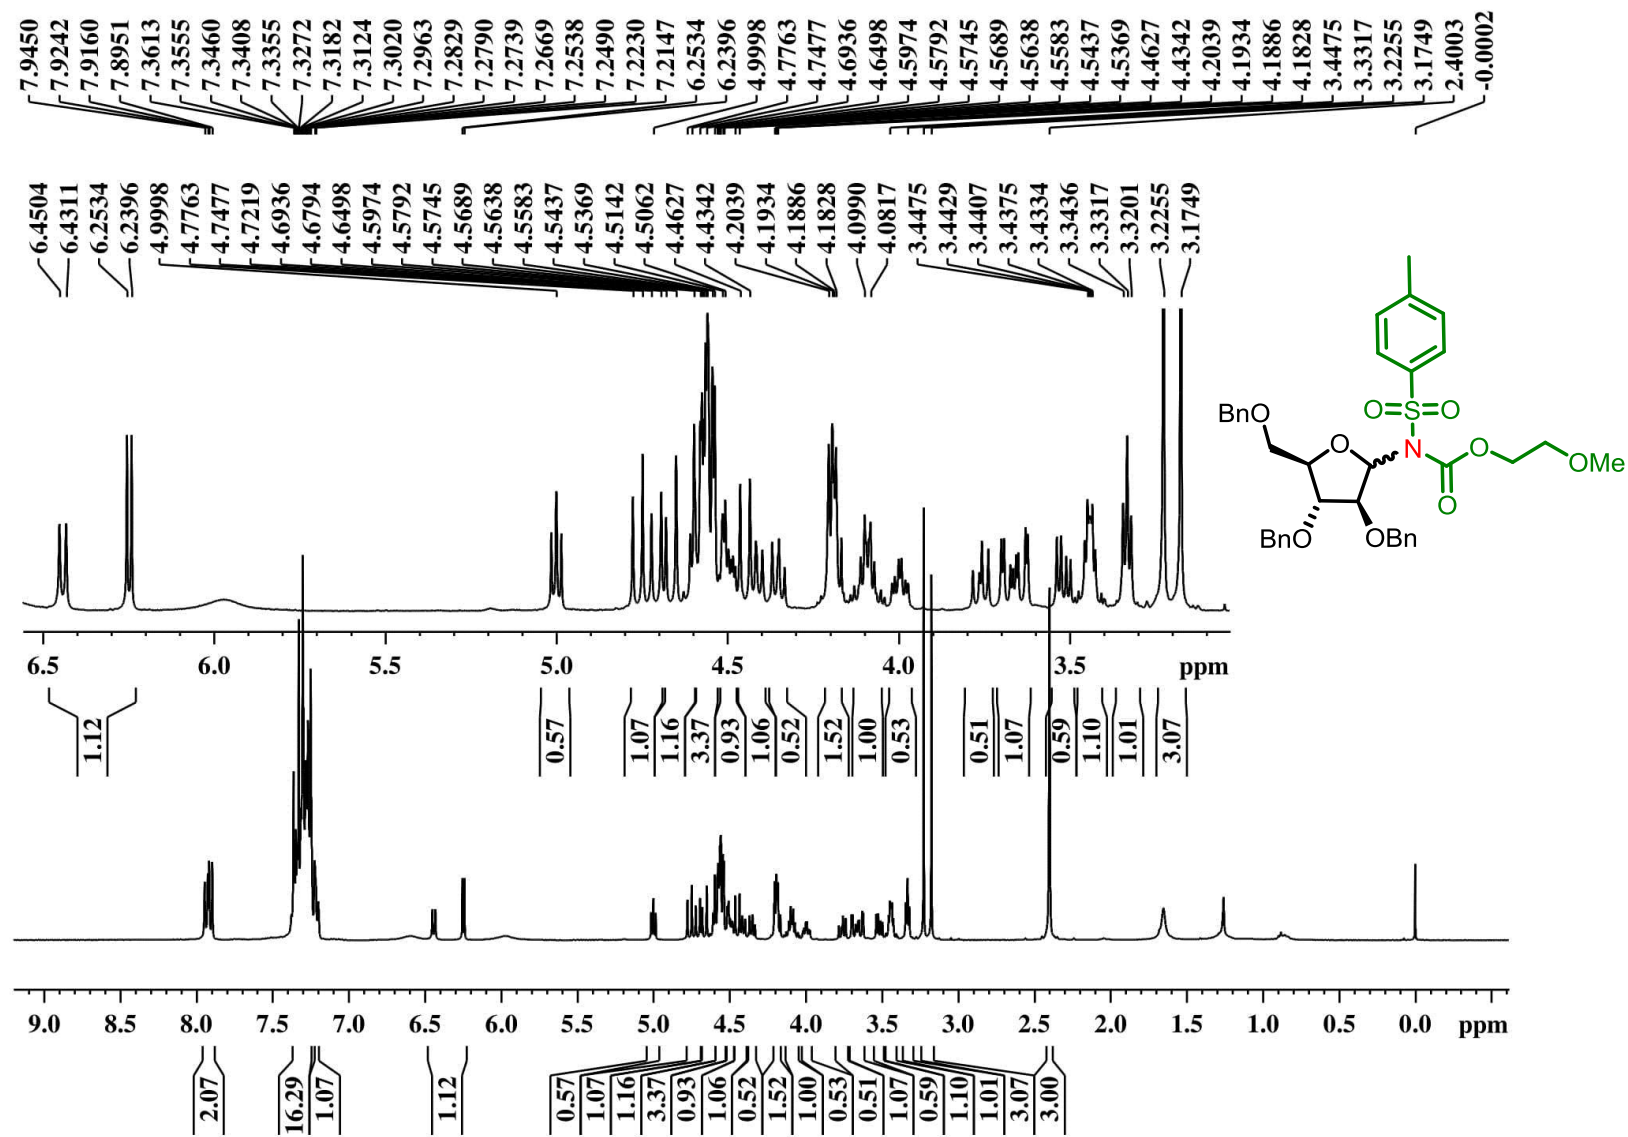

<sup>1</sup>H NMR spectrum of **3q** (400 MHz, CDCl<sub>3</sub>)

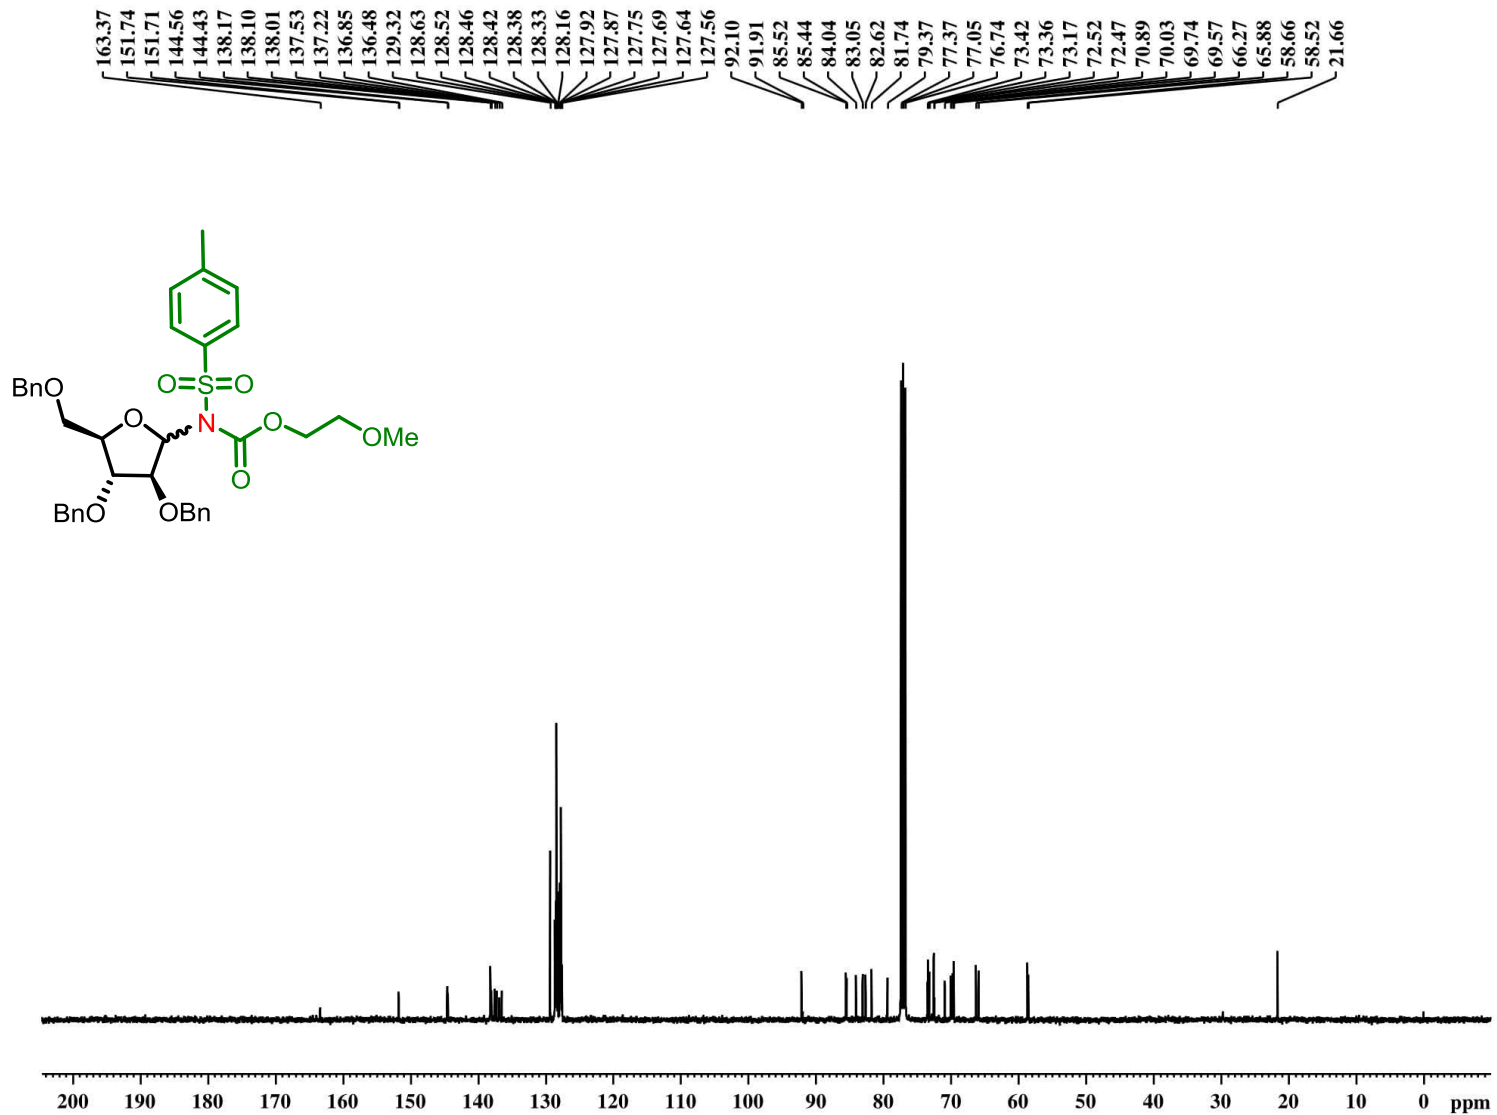

<sup>13</sup>C NMR spectrum of **3q** (100 MHz, MHz, CDCl<sub>3</sub>)

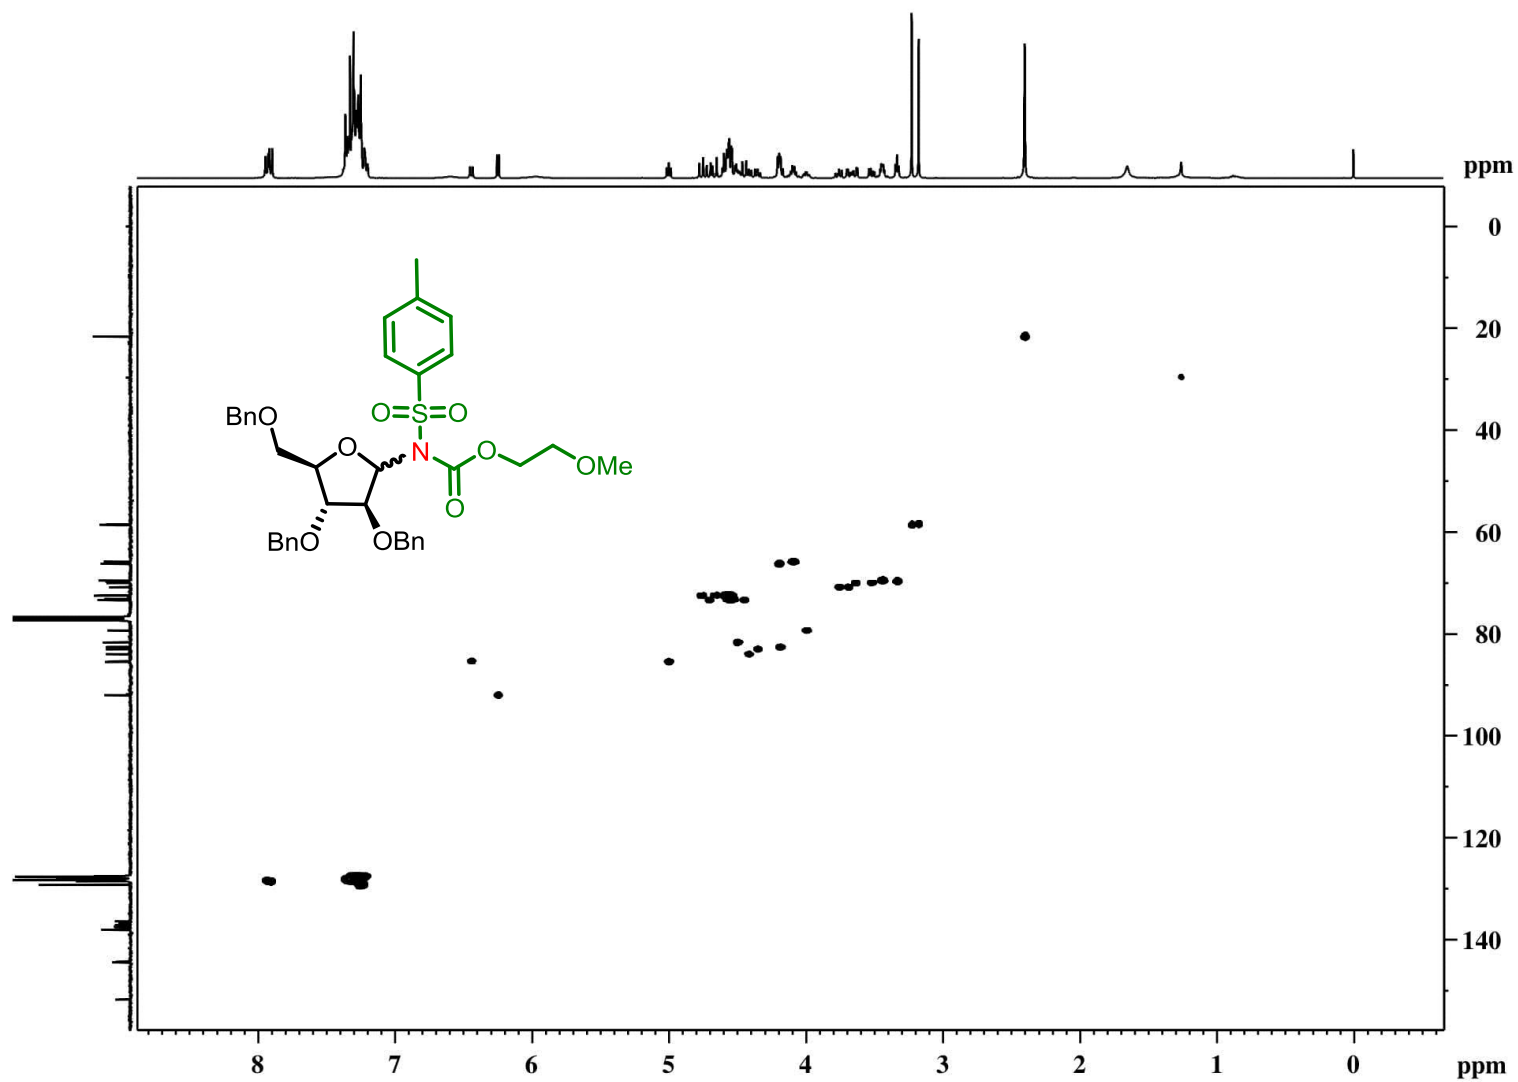

2D HSQC spectrum of **3q** (CDCl<sub>3</sub>).

## SAIF [HRMS Report]

|                   |                      |                       |                               |
|-------------------|----------------------|-----------------------|-------------------------------|
| Data File:        | HRMS20I14AUG21       | Original Data Path:   | D:\INTERNAL NEW\2020\Aug 2020 |
| Sample ID:        | PKM-Ara-02           | Sample Name:          |                               |
| Acquisition Date: | 08/14/20 11:58:42 AM | Run Time(min):        | 0.00                          |
| Vial:             | CStk1-01:21          | Injection Volume(μl): | 1.00                          |

HRMS20I14AUG21 #11-24 RT: 0.11-0.21 AV: 14 SB: 1 0.01 NL: 1.27E7  
T: FTMS + p ESI Full ms [100.00-1500.00]

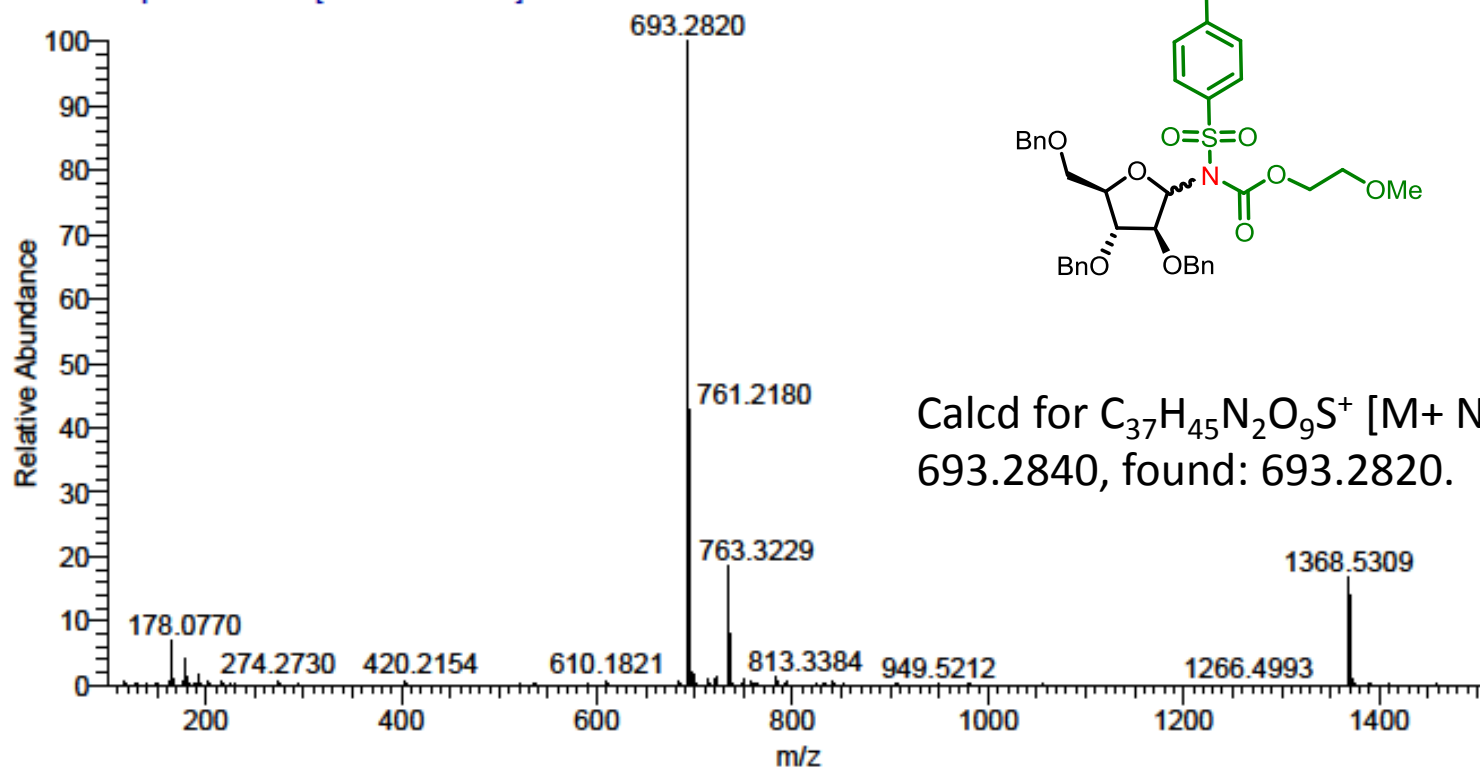

HRMS of 3q



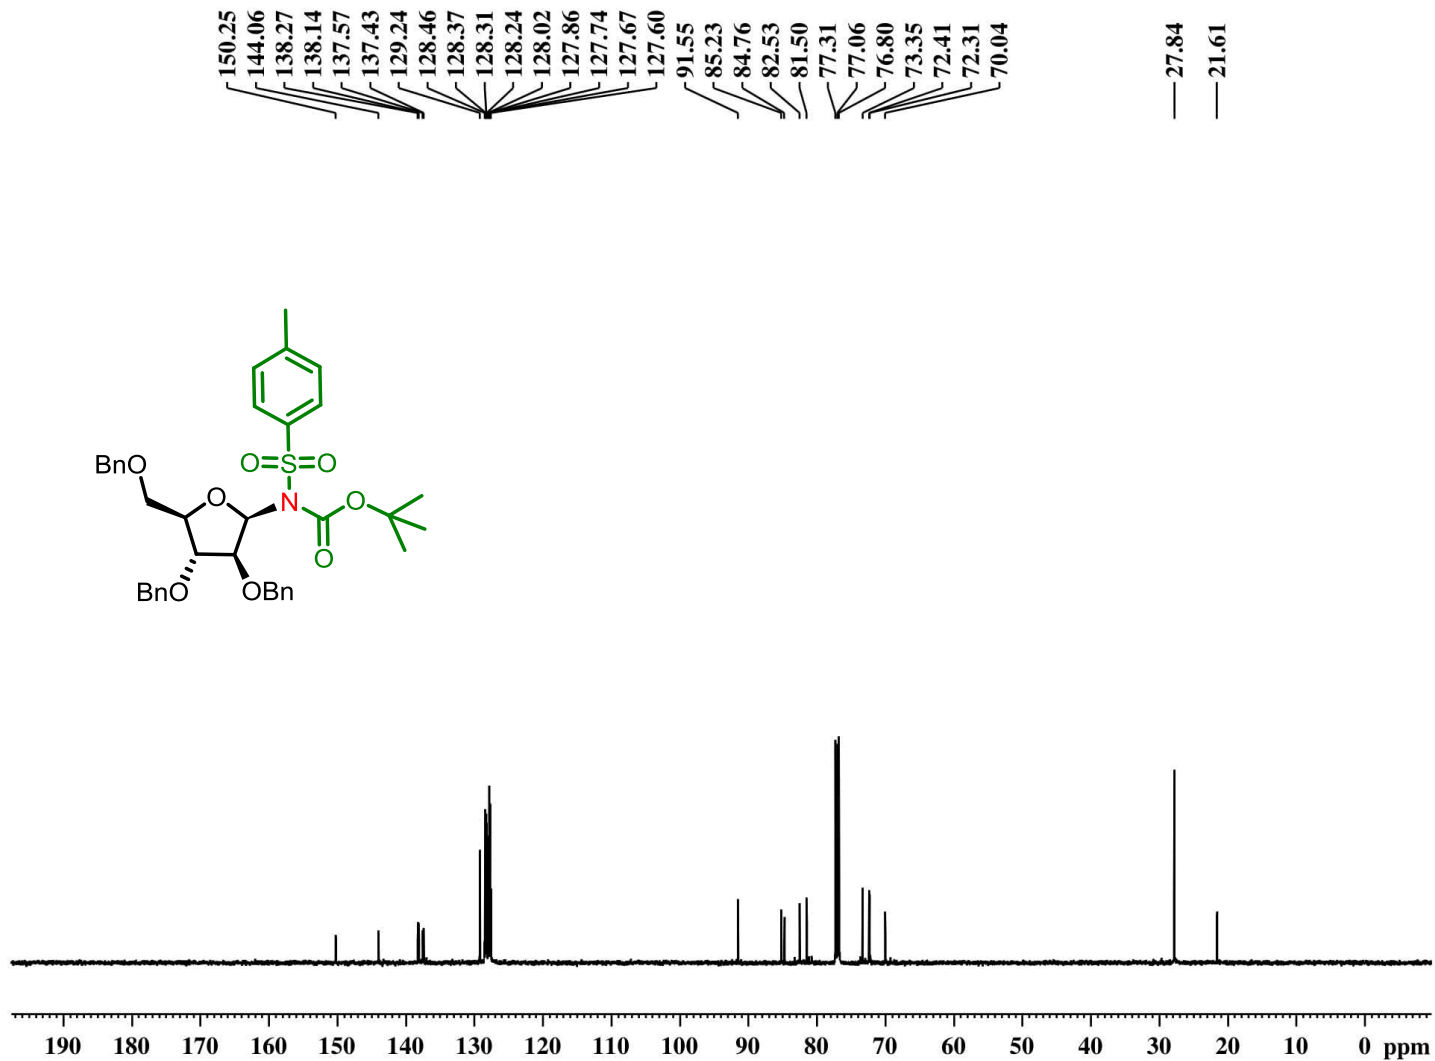

$^{13}\text{C}$  NMR spectrum of **3r** (100 MHz,  $\text{CDCl}_3$ )







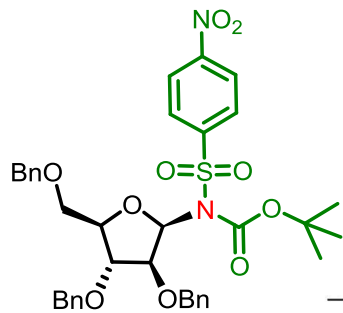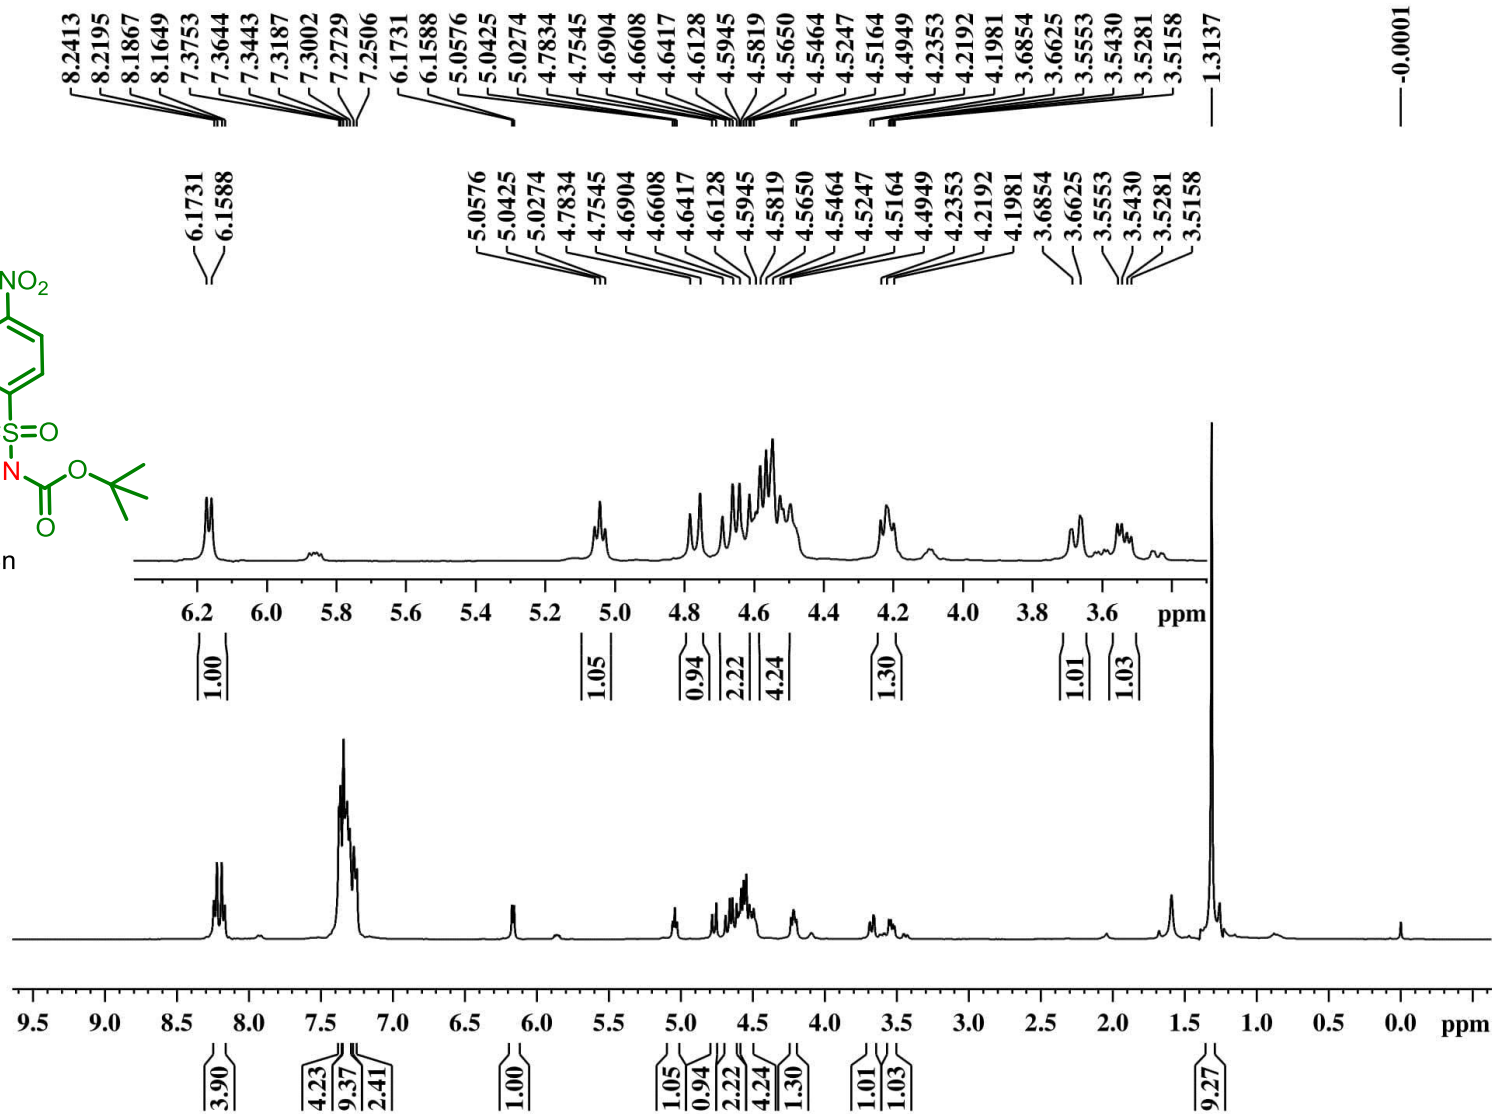

$^1\text{H}$  NMR spectrum of **3s** (400 MHz,  $\text{CDCl}_3$ )

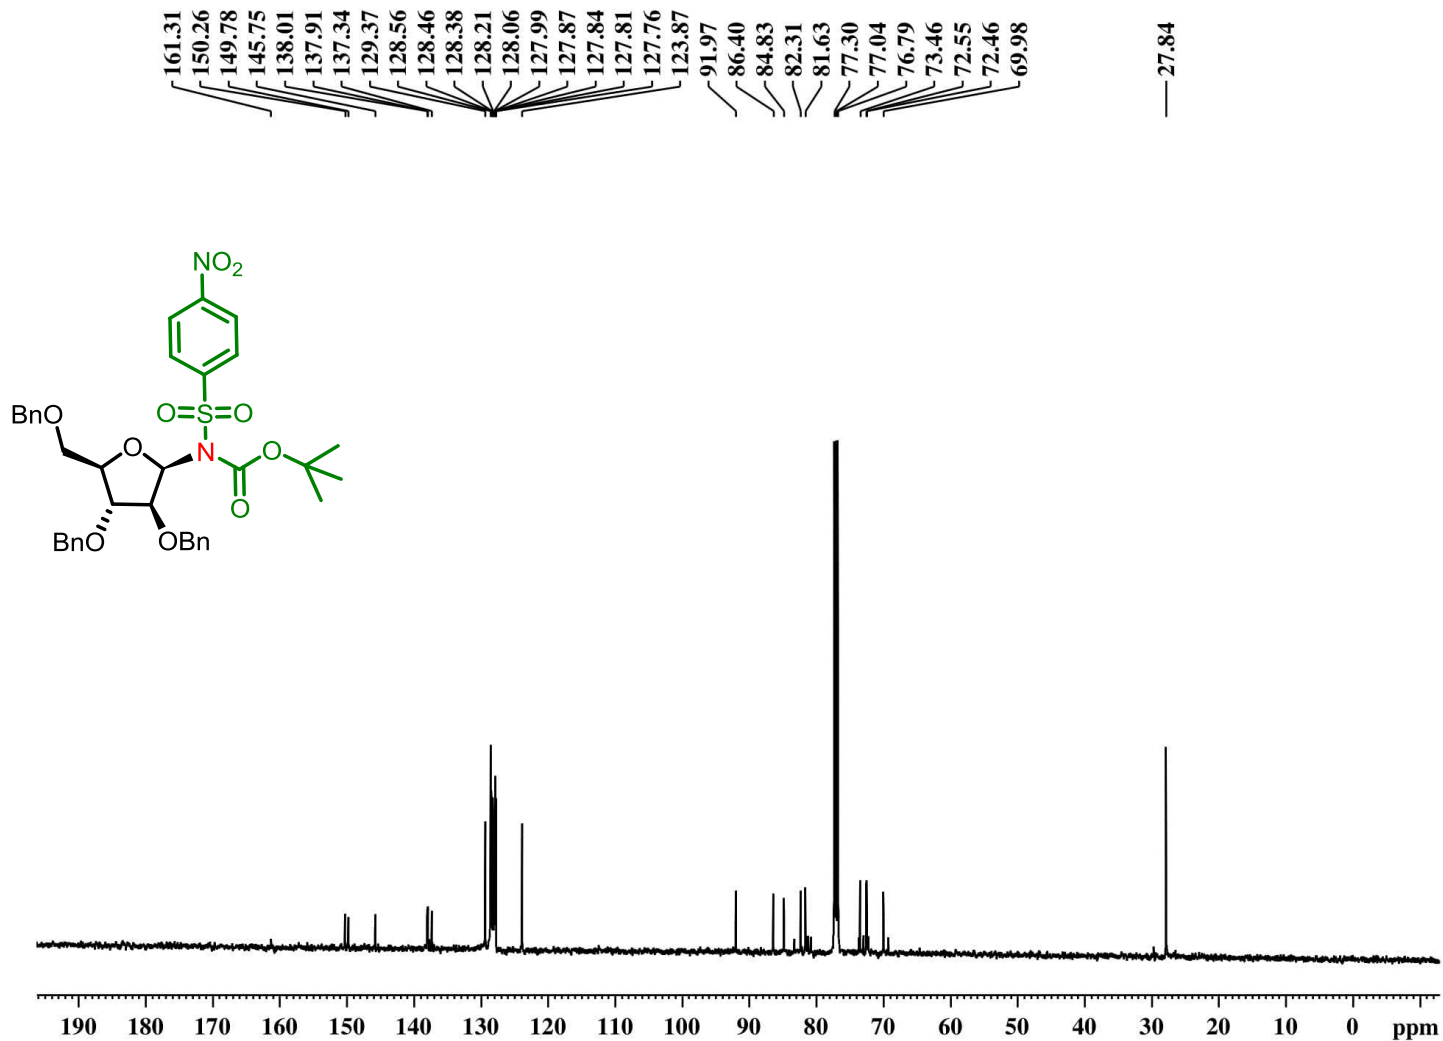

<sup>13</sup>C NMR spectrum of **3s** (100 MHz, MHz, CDCl<sub>3</sub>)

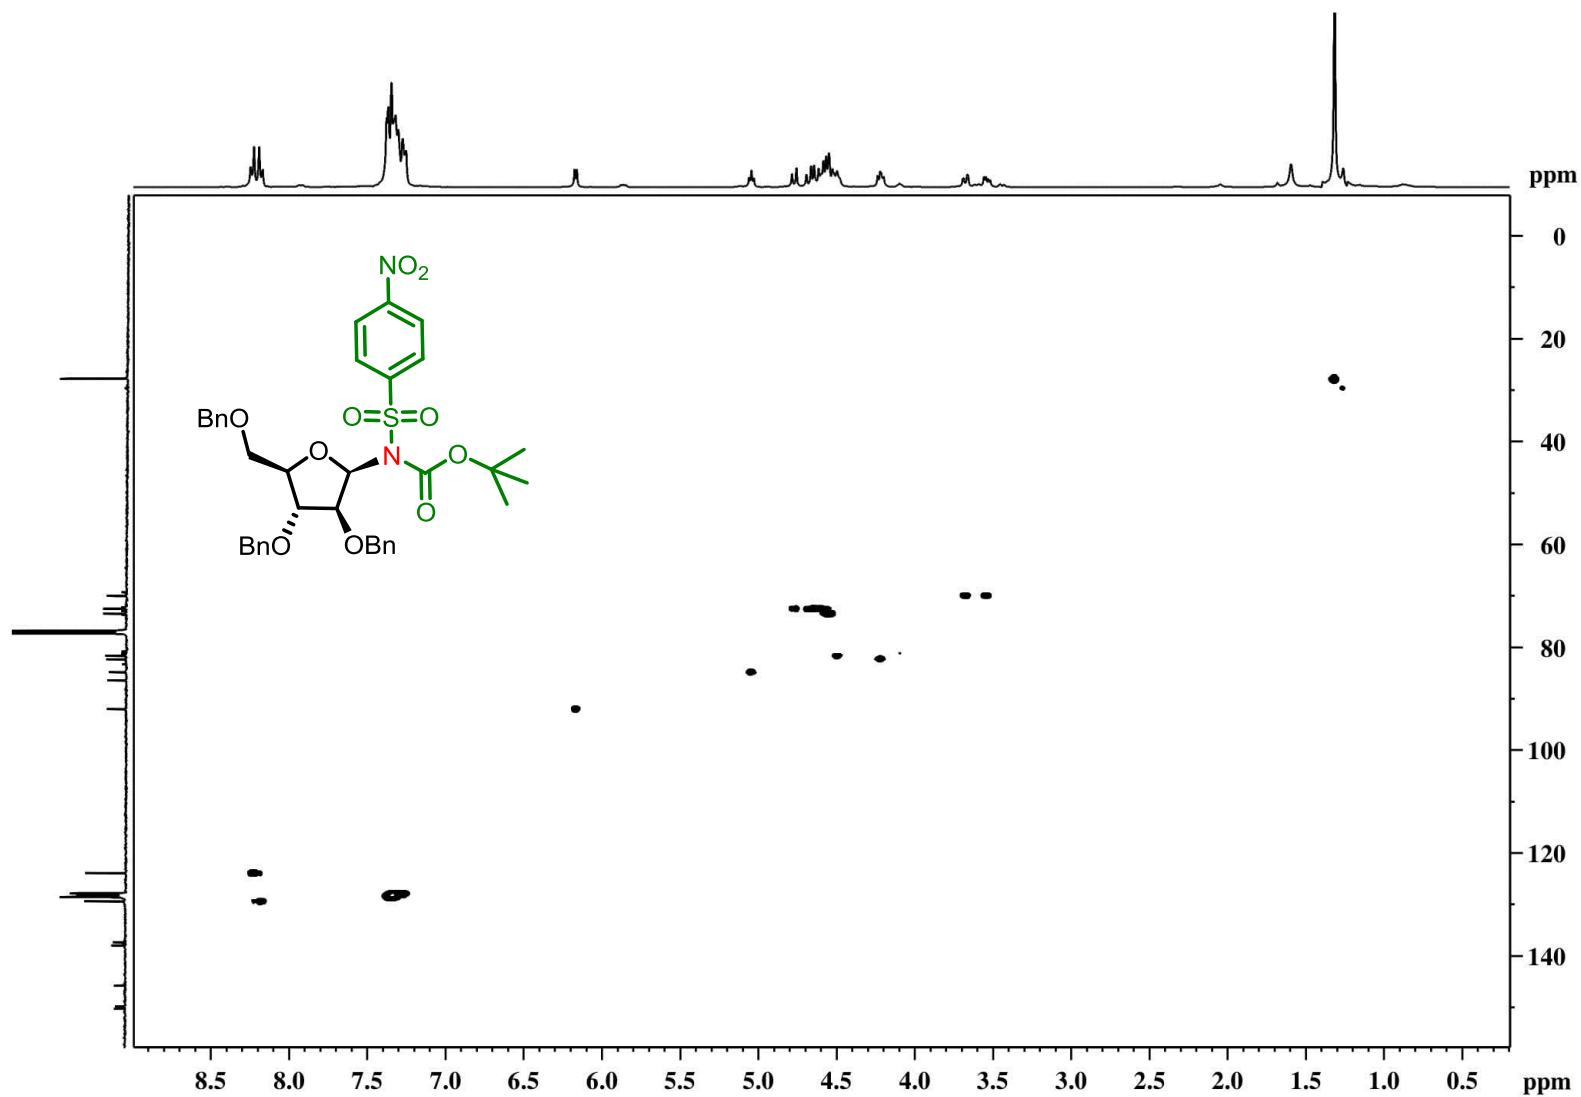

2D HSQC spectrum of **3s** (CDCl<sub>3</sub>).

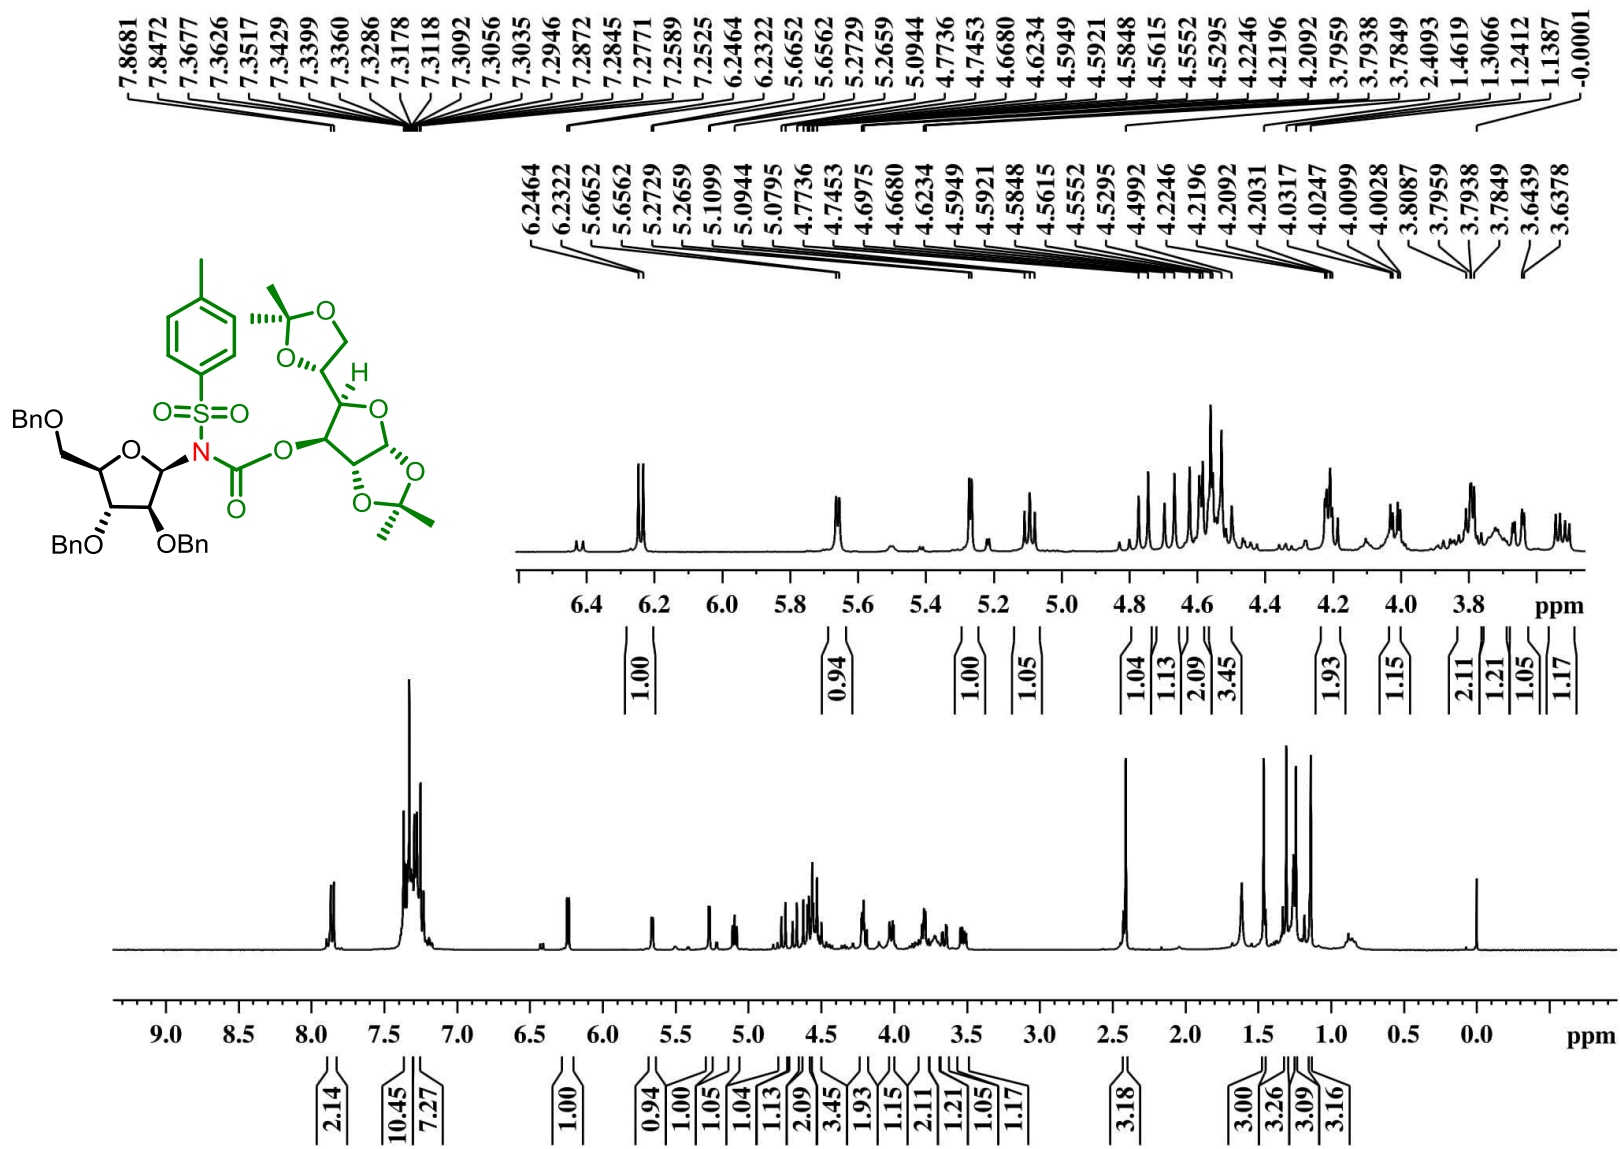

<sup>1</sup>H NMR spectrum of **3t** (400 MHz, CDCl<sub>3</sub>)

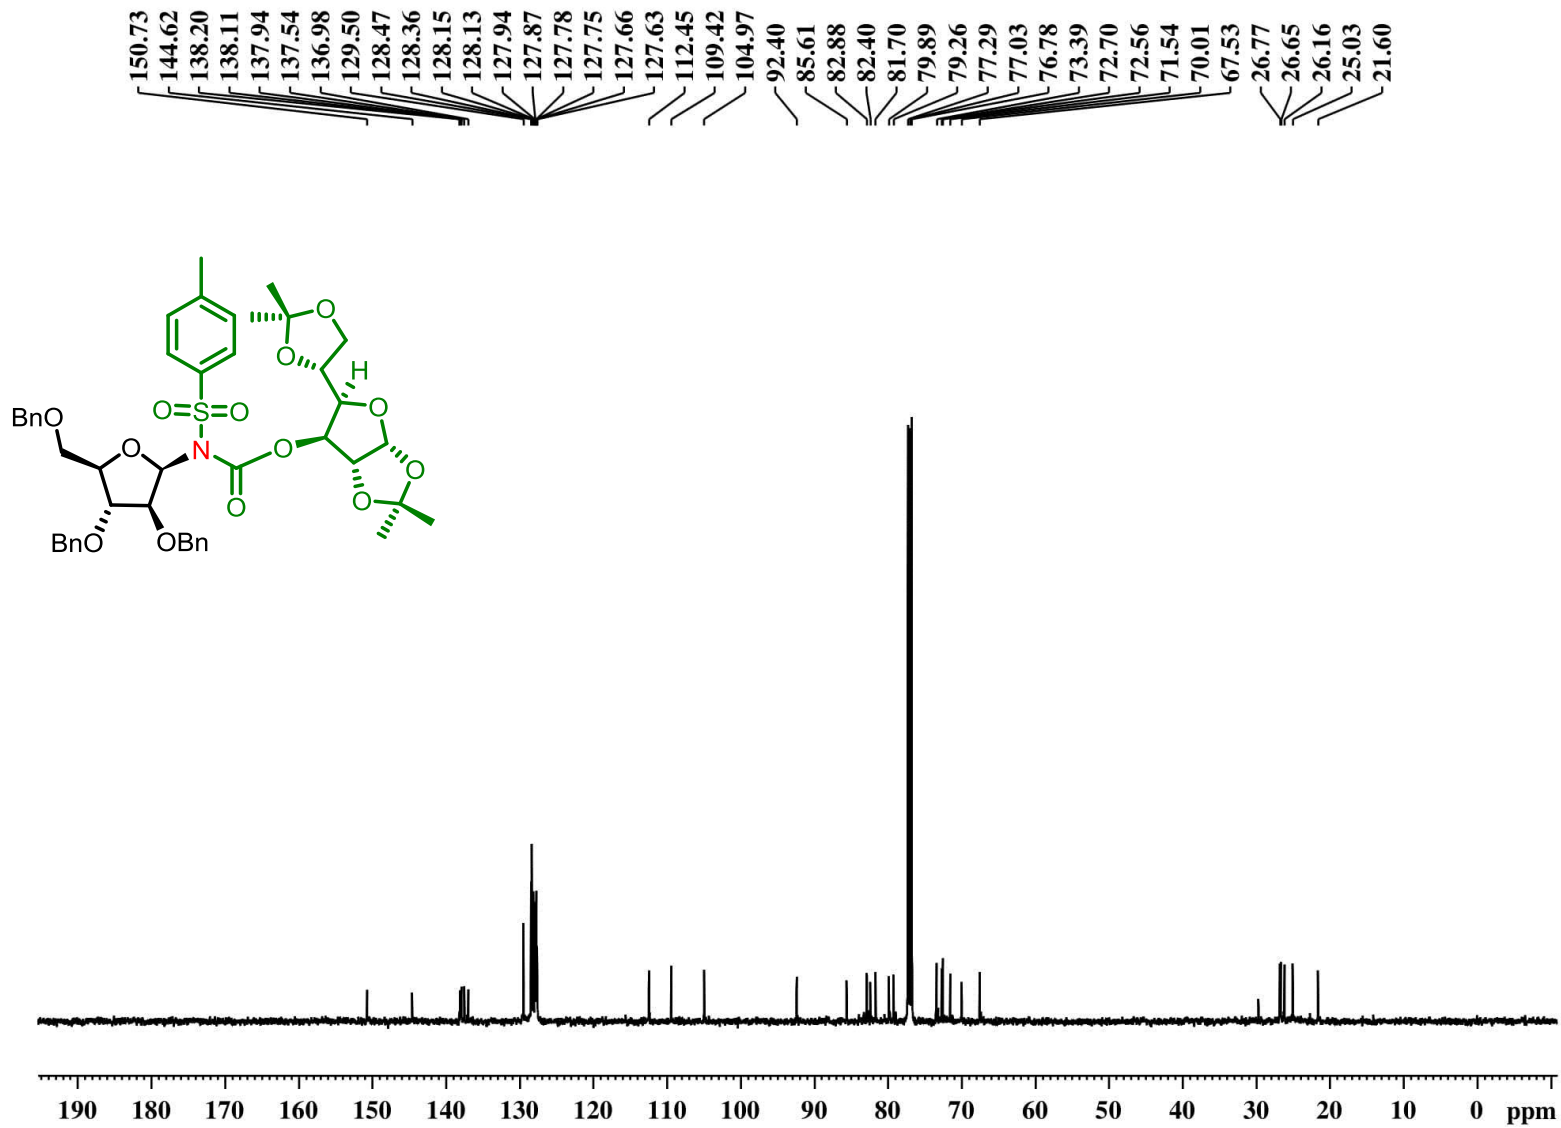

<sup>13</sup>C NMR spectrum of **3t** (100 MHz, MHz, CDCl<sub>3</sub>)





## SAIF [HRMS Report]

|                   |                      |                       |                                  |
|-------------------|----------------------|-----------------------|----------------------------------|
| Data File:        | HRMS20I13AUG12       | Original Data Path:   | D:\INTERNAL NEW\2020\Aug<br>2020 |
| Sample ID:        | PKM-Ara-04           | Sample Name:          |                                  |
| Acquisition Date: | 08/13/20 04:48:25 PM | Run Time(min):        | 0.00                             |
| Vial:             | CStk1-01:12          | Injection Volume(μl): | 1.00                             |

HRMS20I13AUG12 #11-24 RT: 0.11-0.21 AV: 14 SB: 1 0.01 NL: 5.37E6  
T: FTMS + p ESI Full ms [100.00-1500.00]

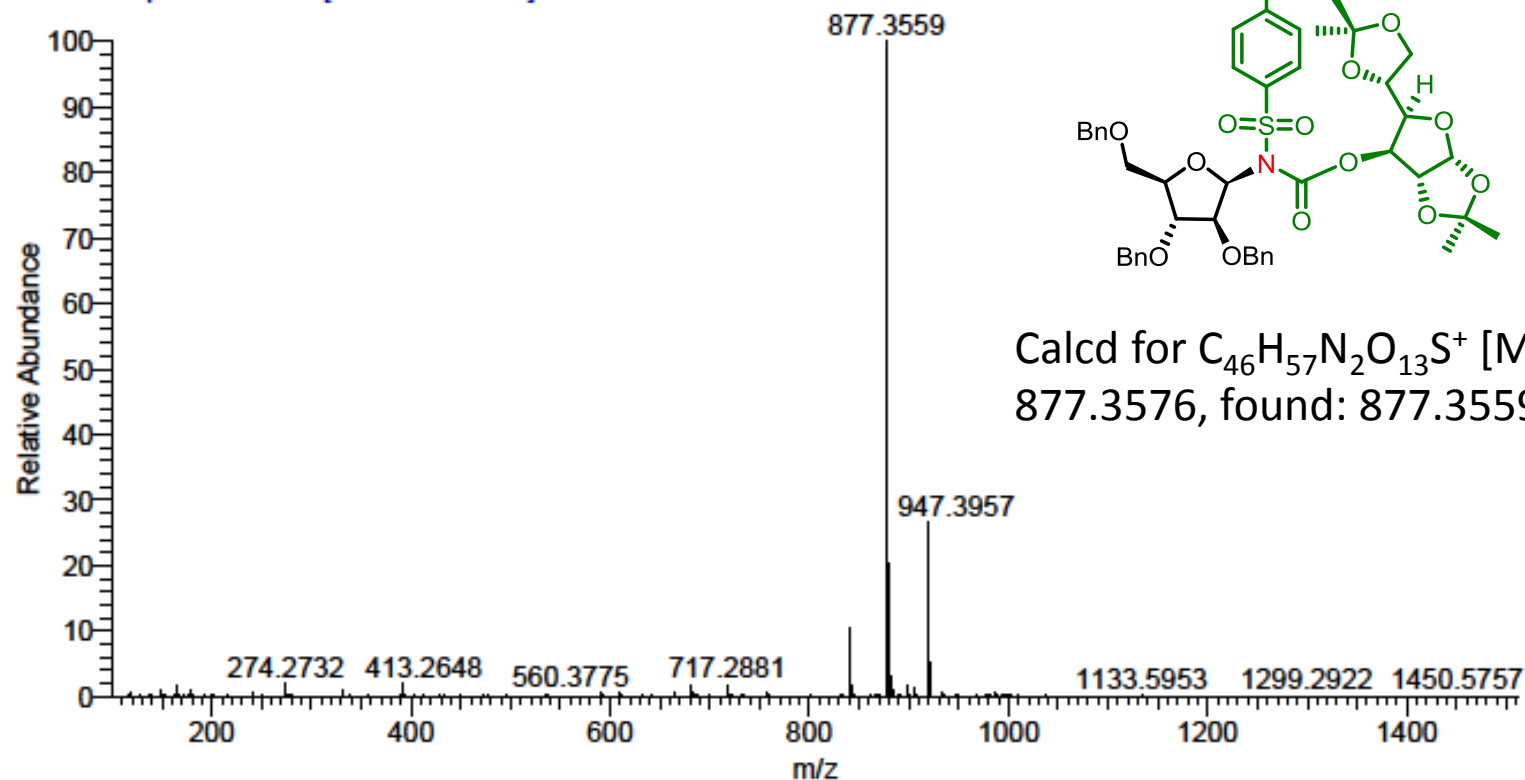

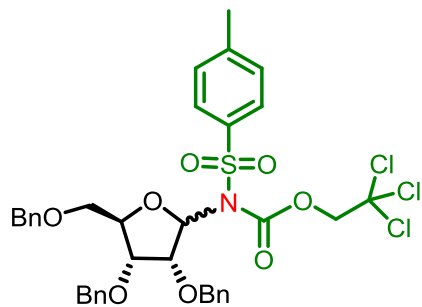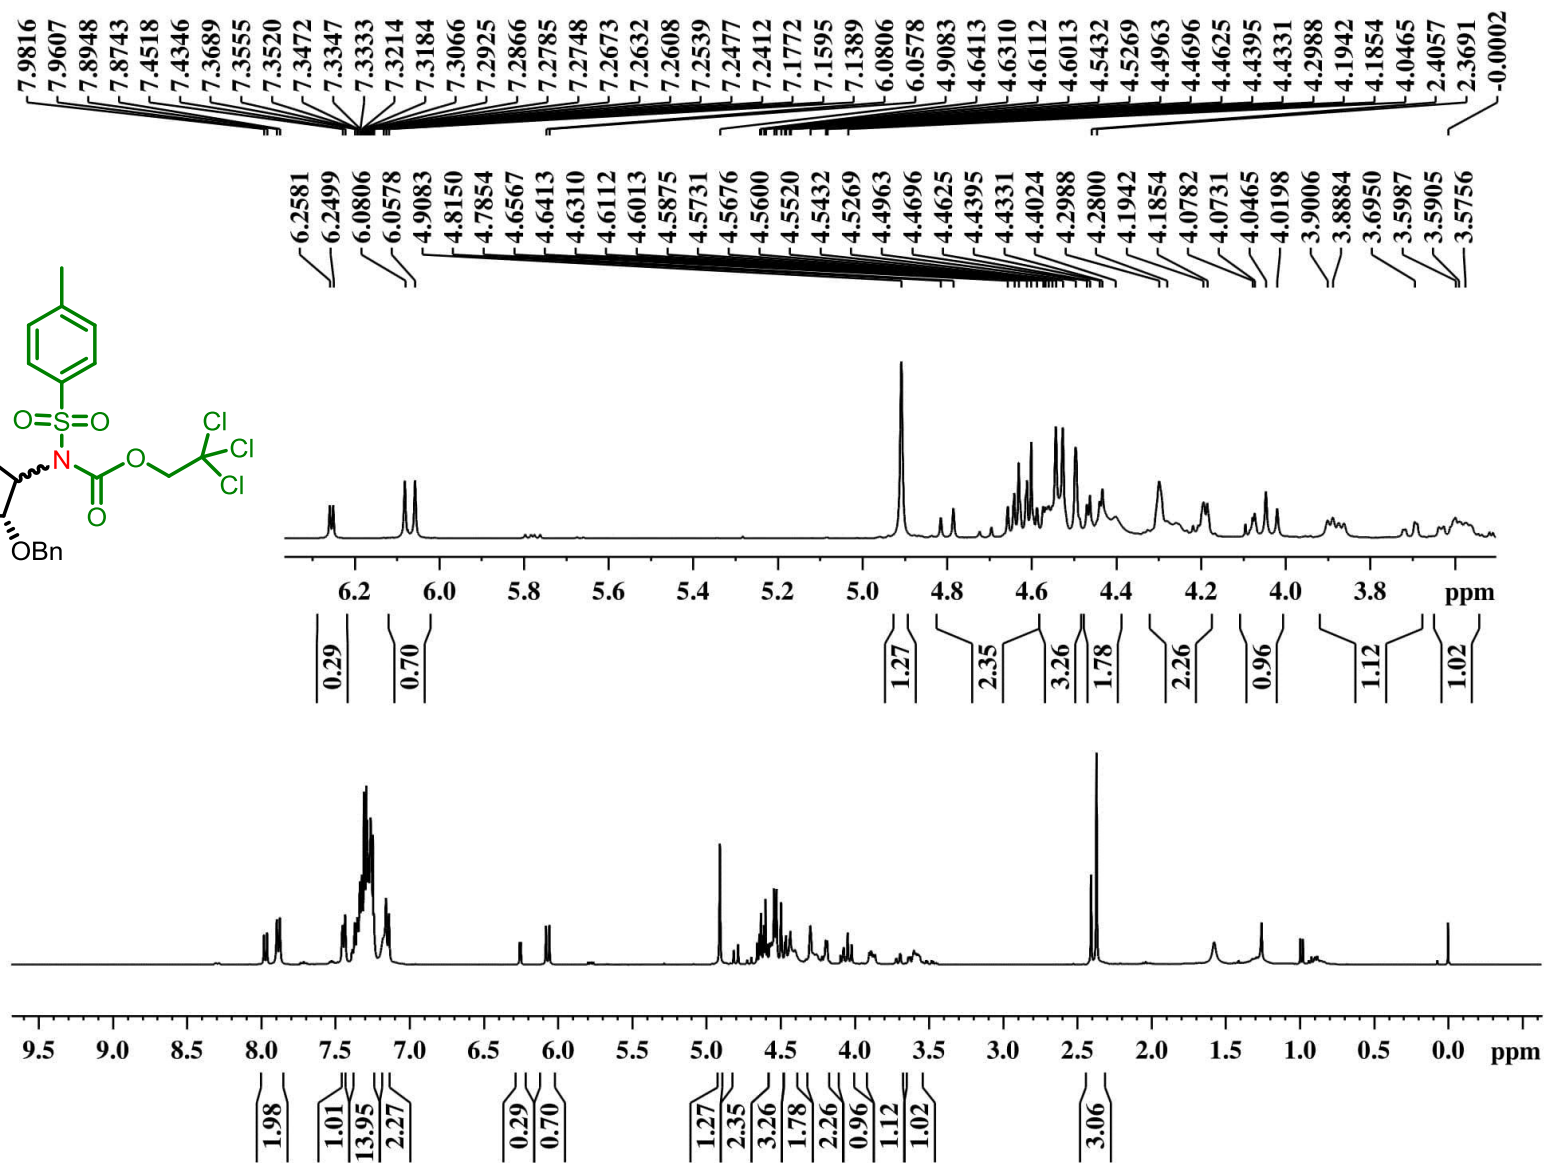

<sup>1</sup>H NMR spectrum of **3u** (400 MHz, CDCl<sub>3</sub>)

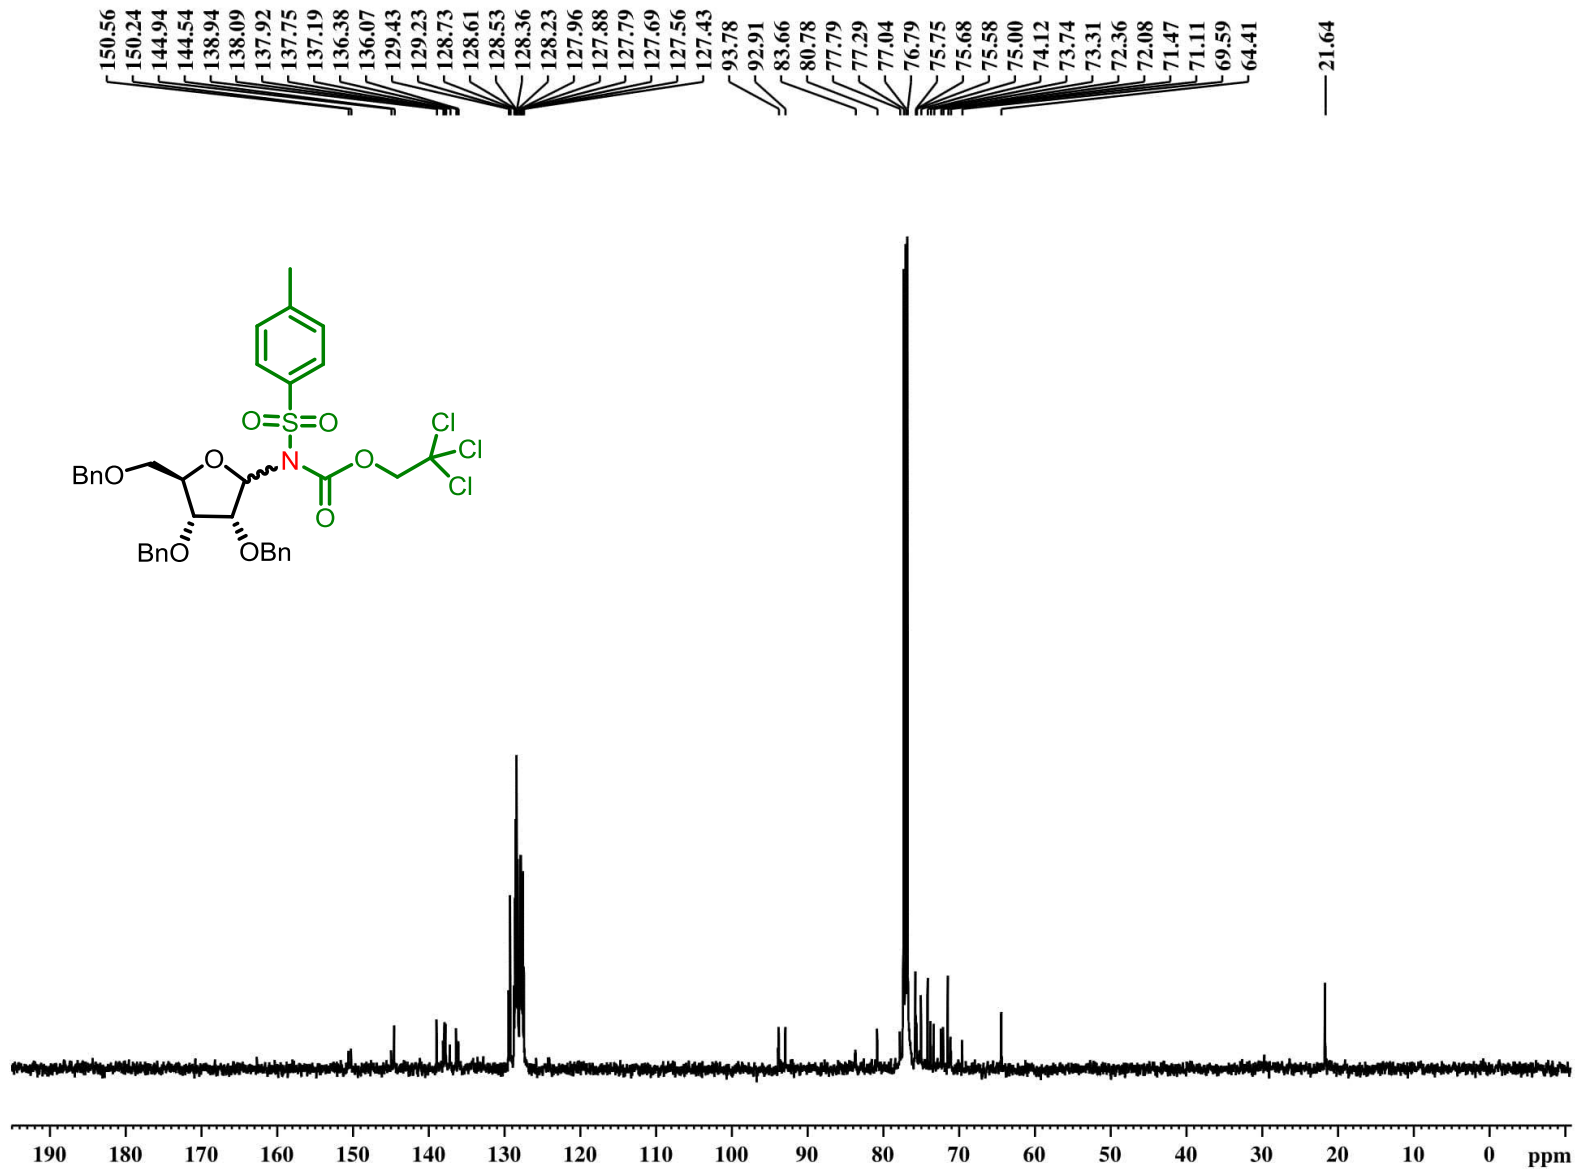

<sup>13</sup>C NMR spectrum of **3u** (100 MHz, MHz, CDCl<sub>3</sub>)

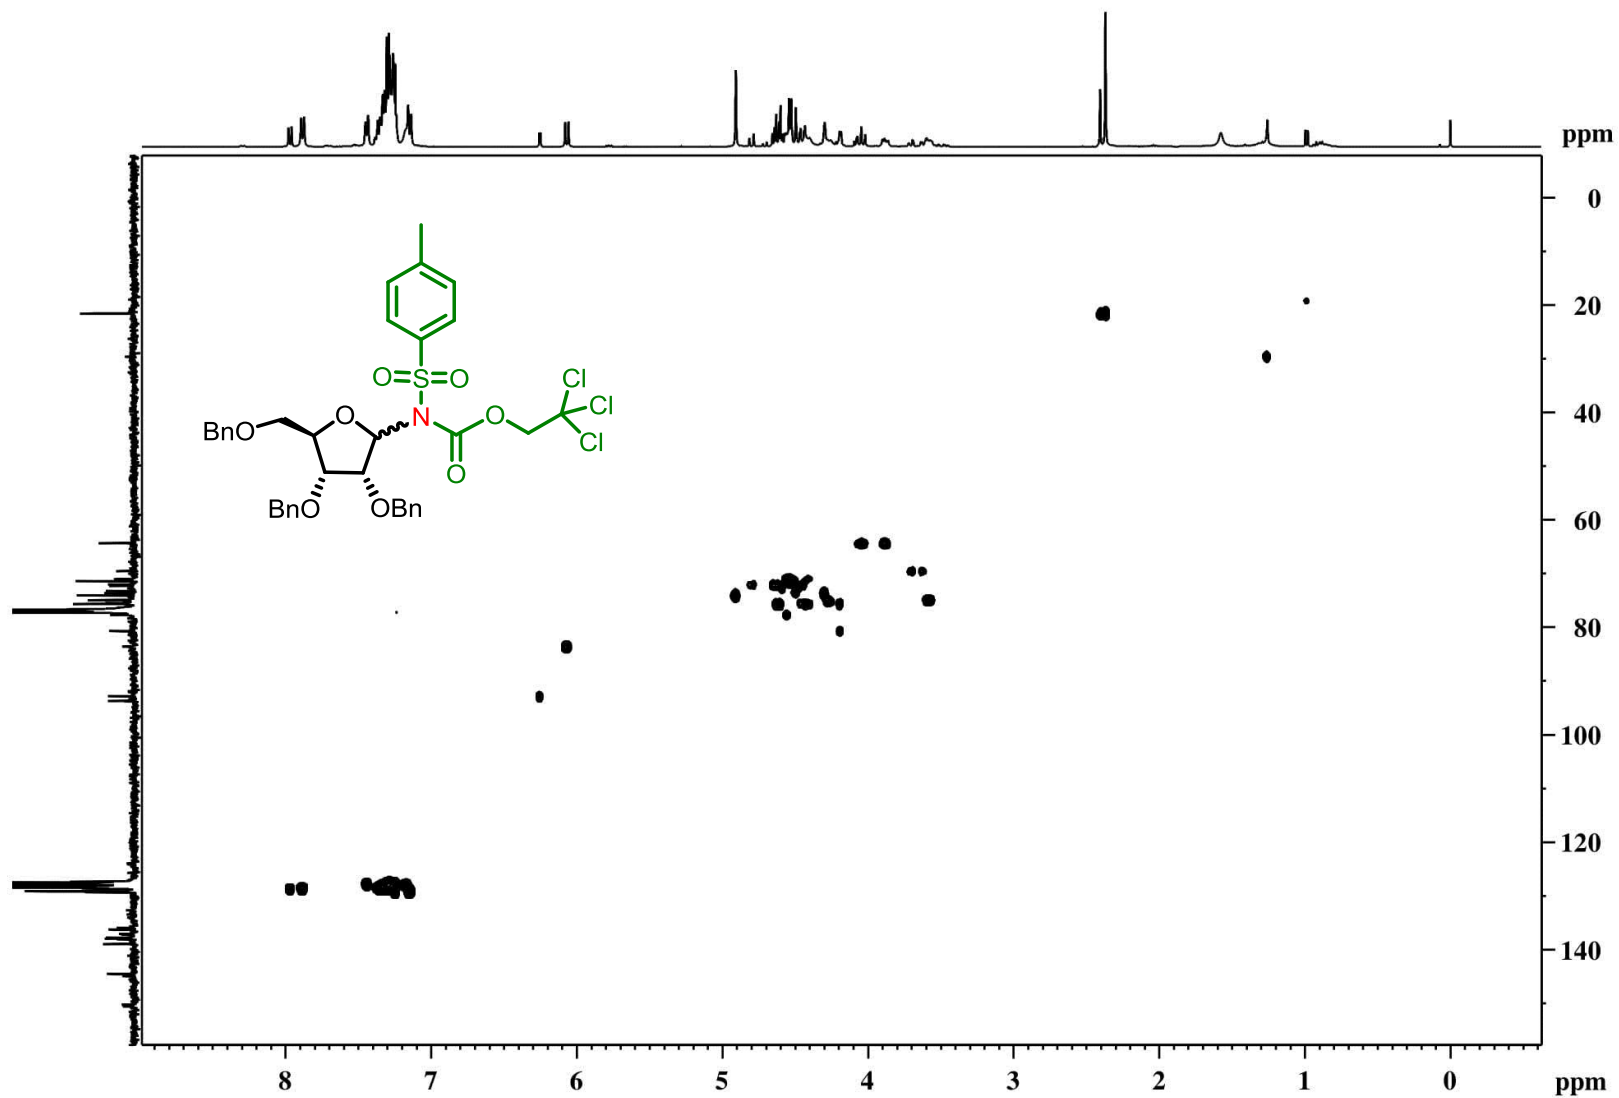

2D HSQC spectrum of **3u** ( $\text{CDCl}_3$ ).

HRMS20113JUL39 #17-27 RT: 0.16-0.24 AV: 11 SB: 7 0.02-0.08 NL: 4.92E5

T: FTMS + p ESI Full ms [100.00-1500.00]

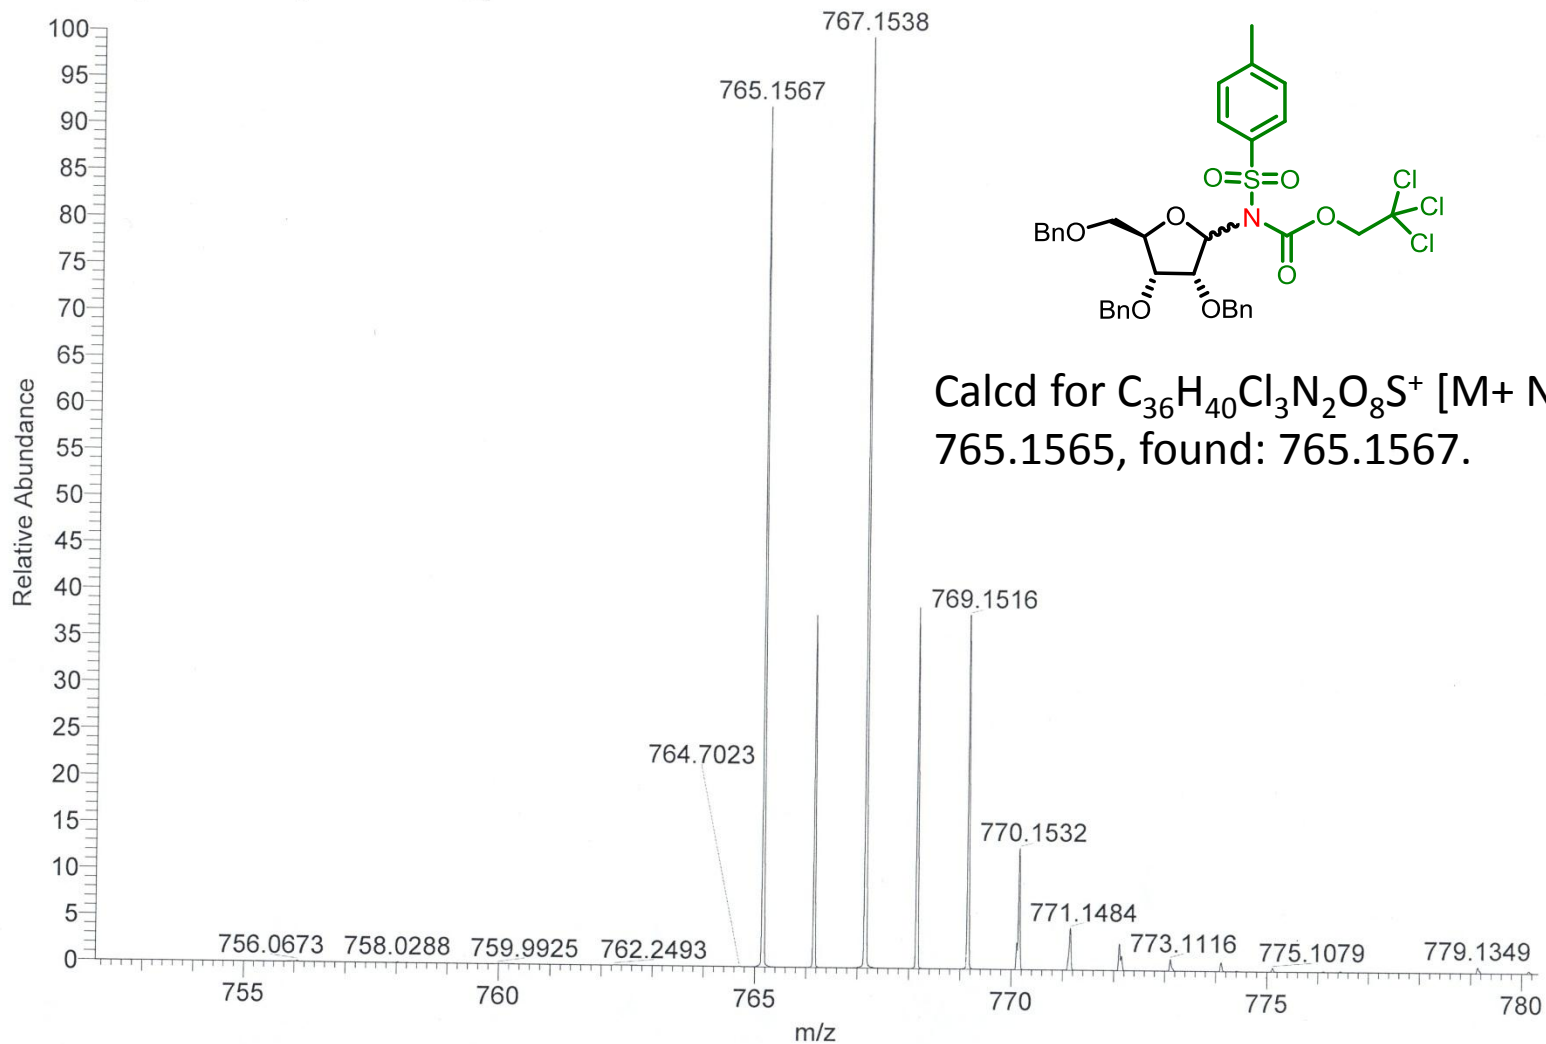HRMS of **3u**

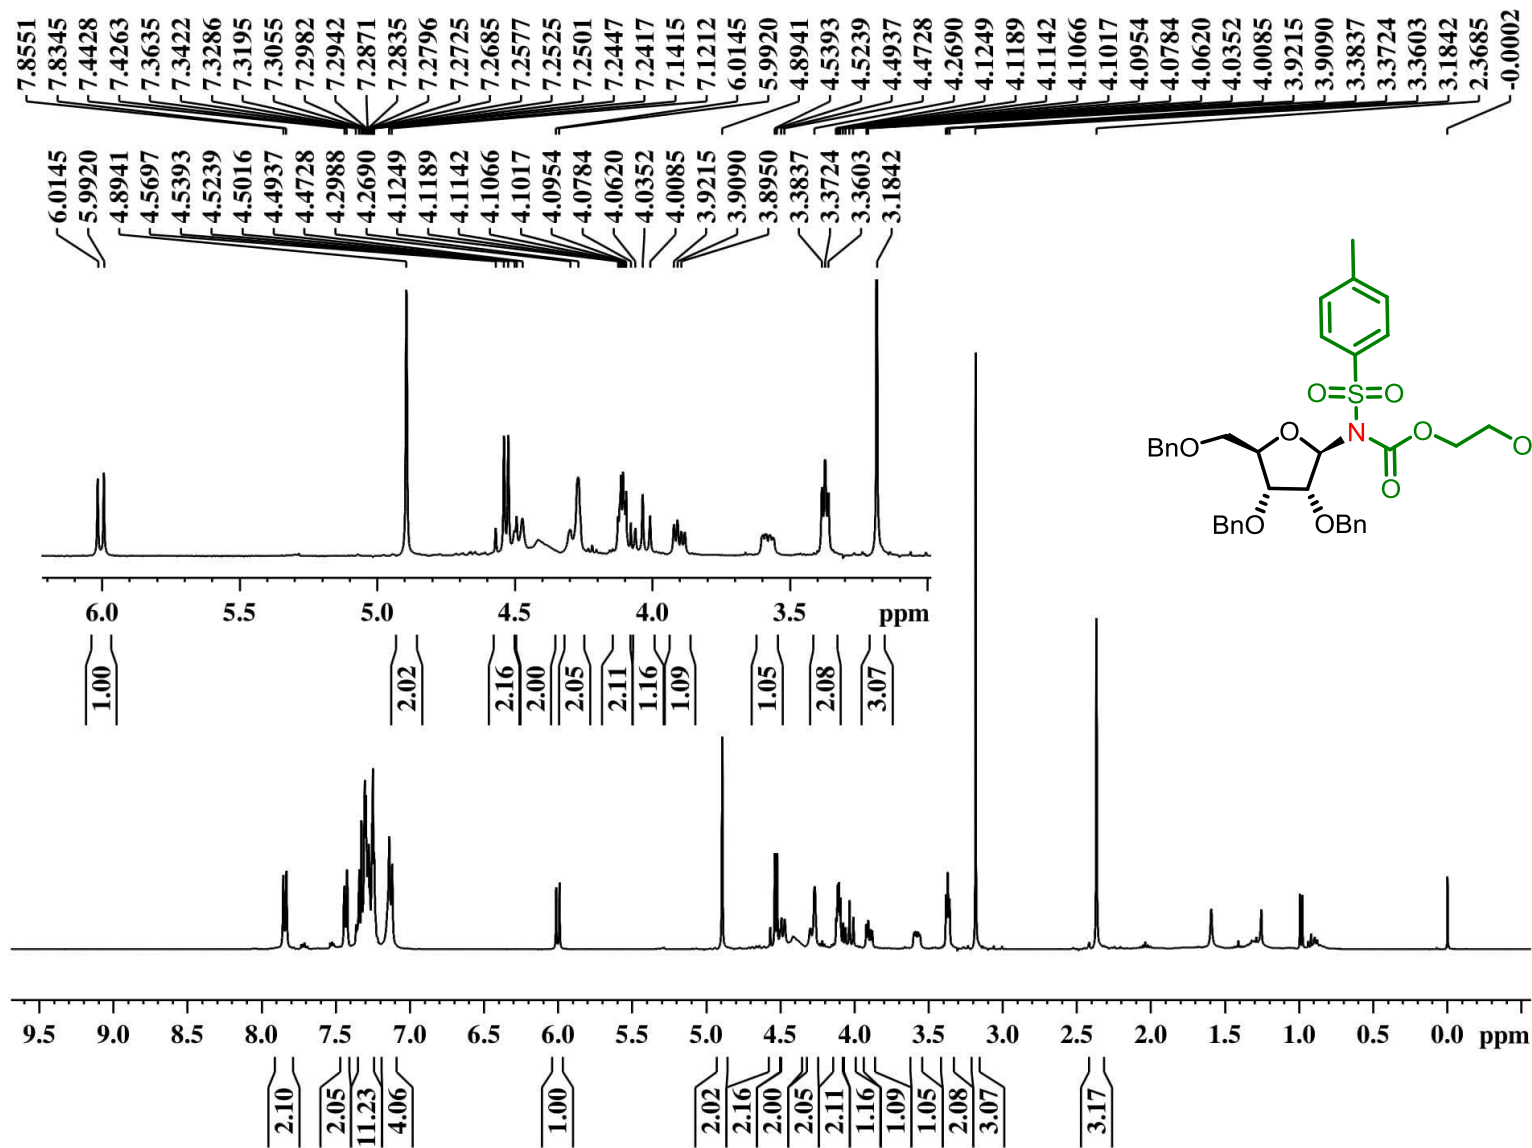

<sup>1</sup>H NMR spectrum of **3v** (400 MHz, CDCl<sub>3</sub>)

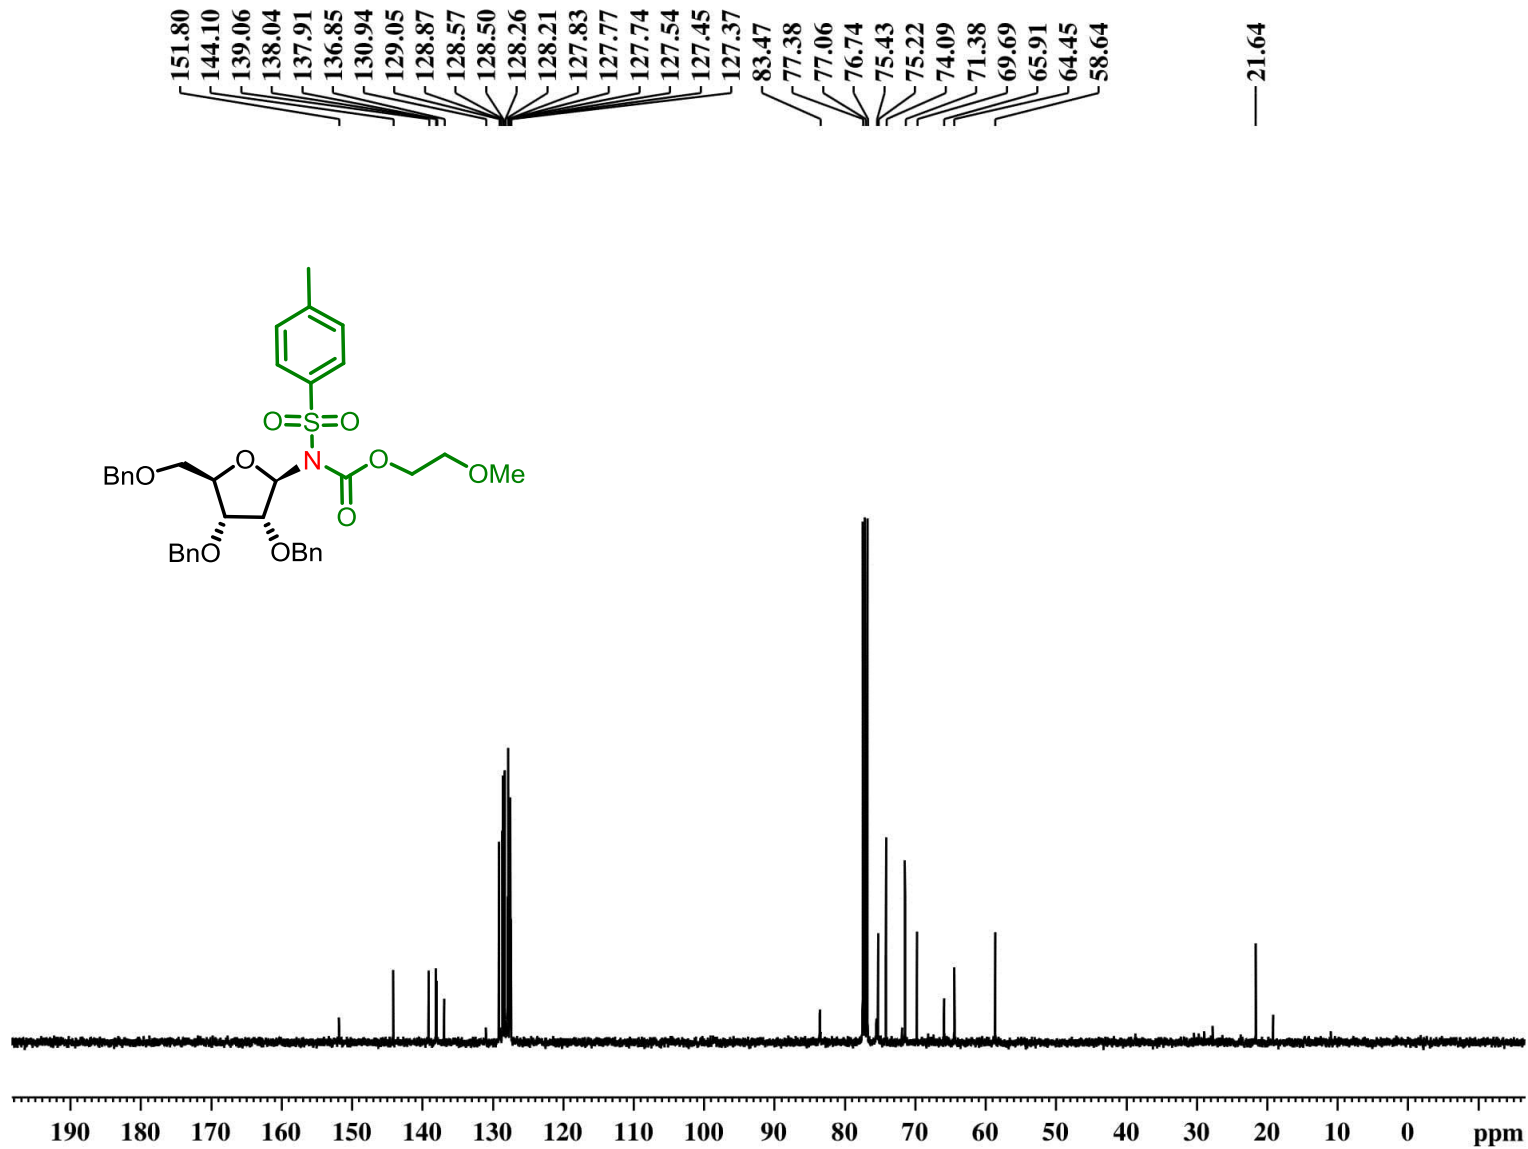

<sup>13</sup>C NMR spectrum of **3v** (100 MHz, MHz, CDCl<sub>3</sub>)

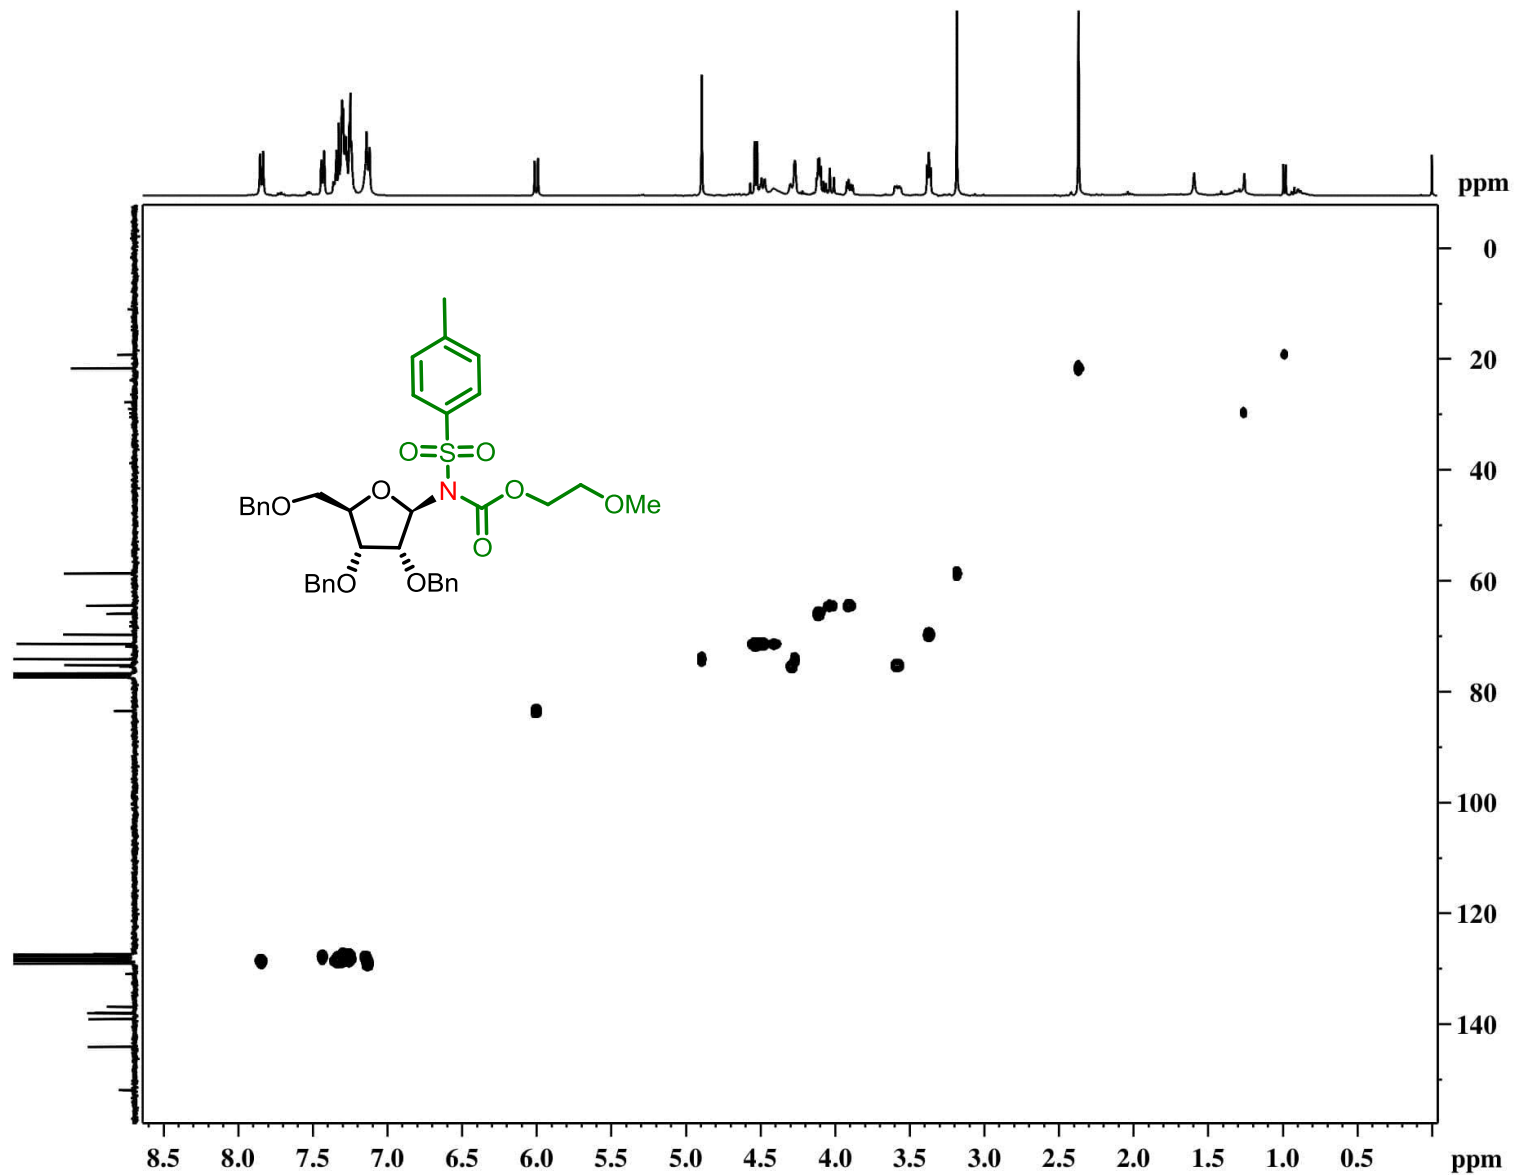

2D HSQC spectrum of **3v** (CDCl<sub>3</sub>).



HRMS20I04MAR10 #43-52 RT: 0.32-0.39 AV: 10 SB: 7 0.02-0.07 NL: 7.80E5  
T: FTMS + p ESI Full ms [100.00-1500.00]

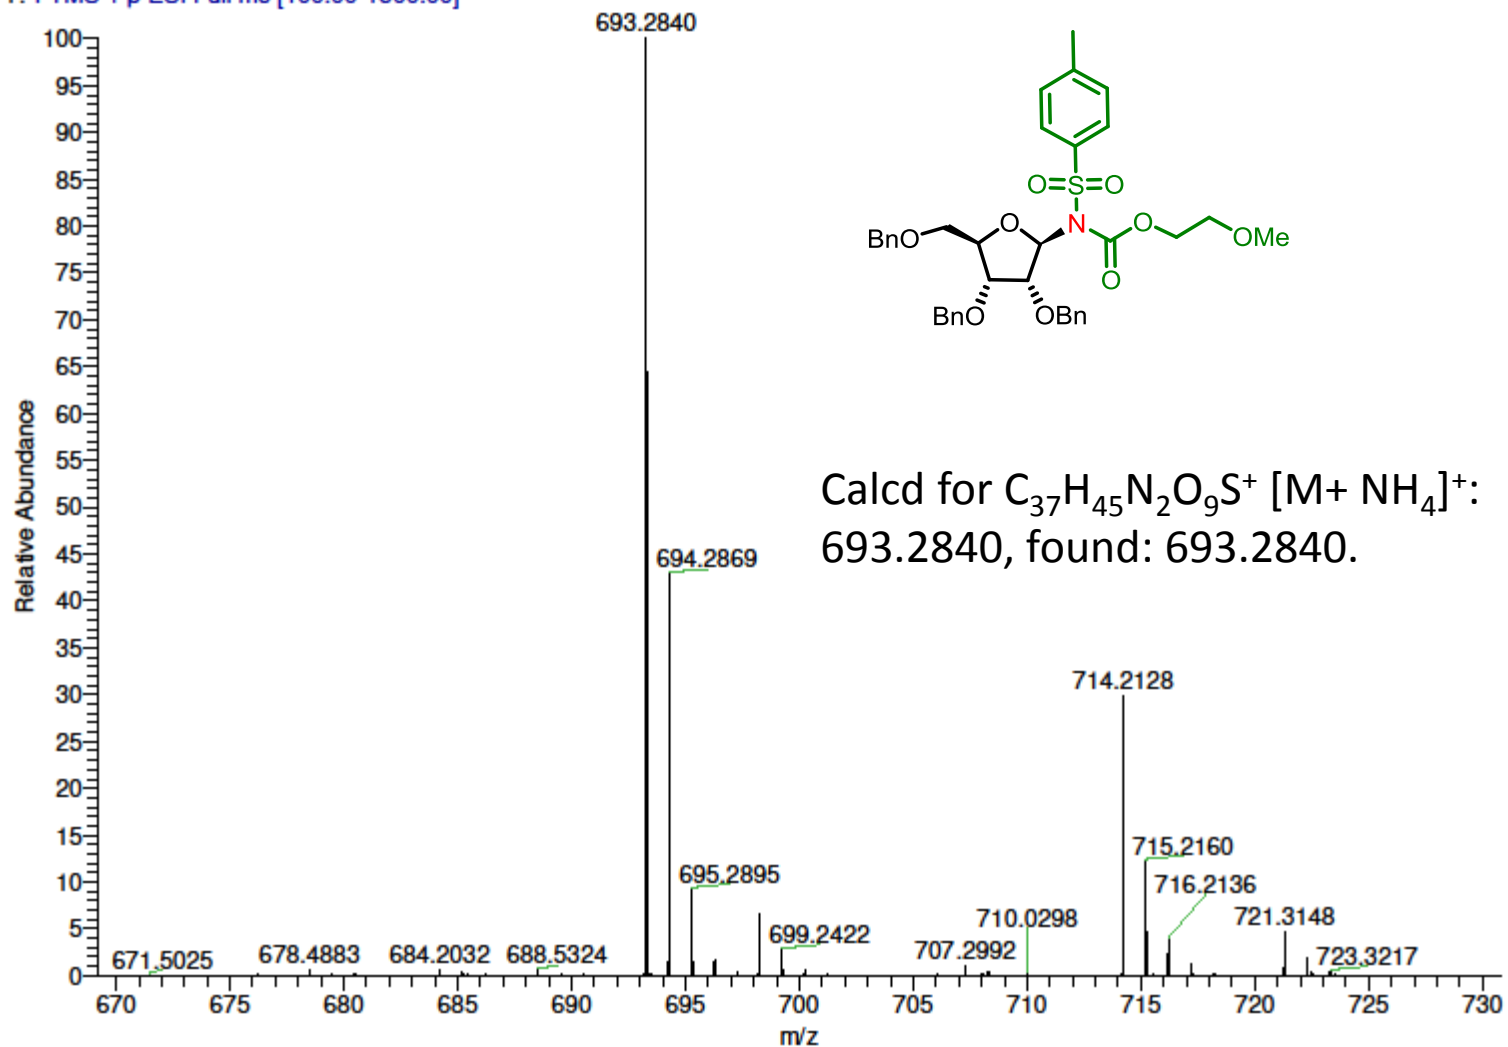HRMS of **3v**

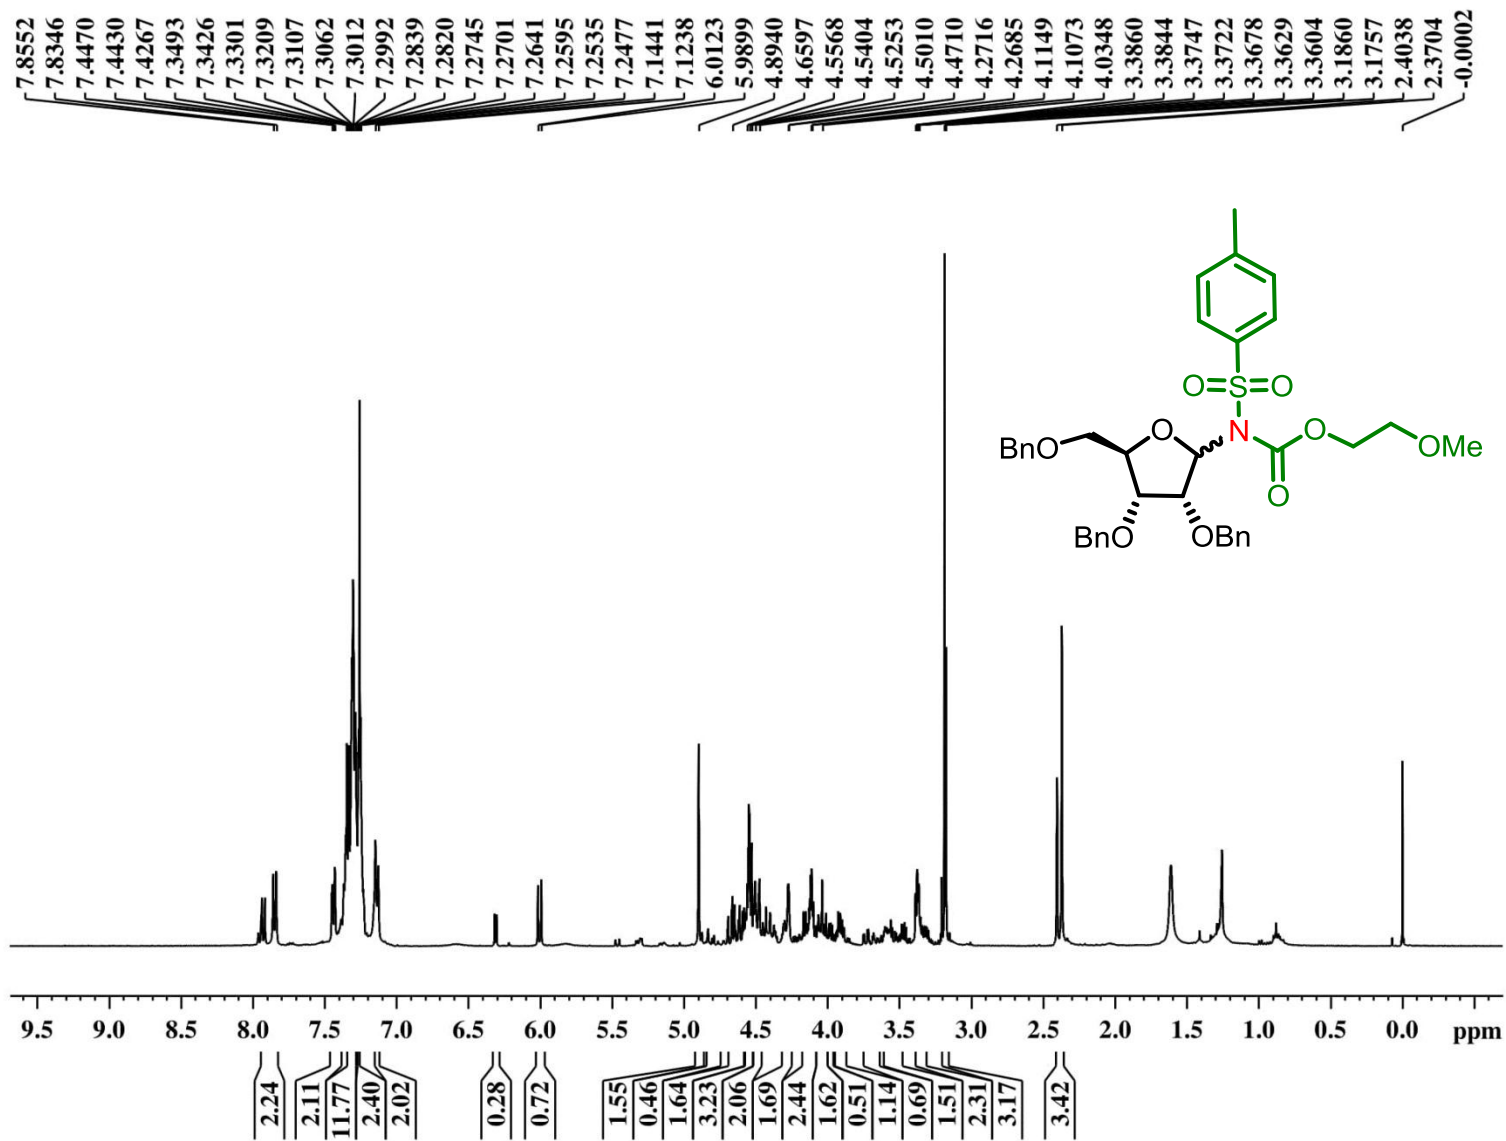

$^1\text{H}$  NMR spectrum of **3v'** (400 MHz,  $\text{CDCl}_3$ )

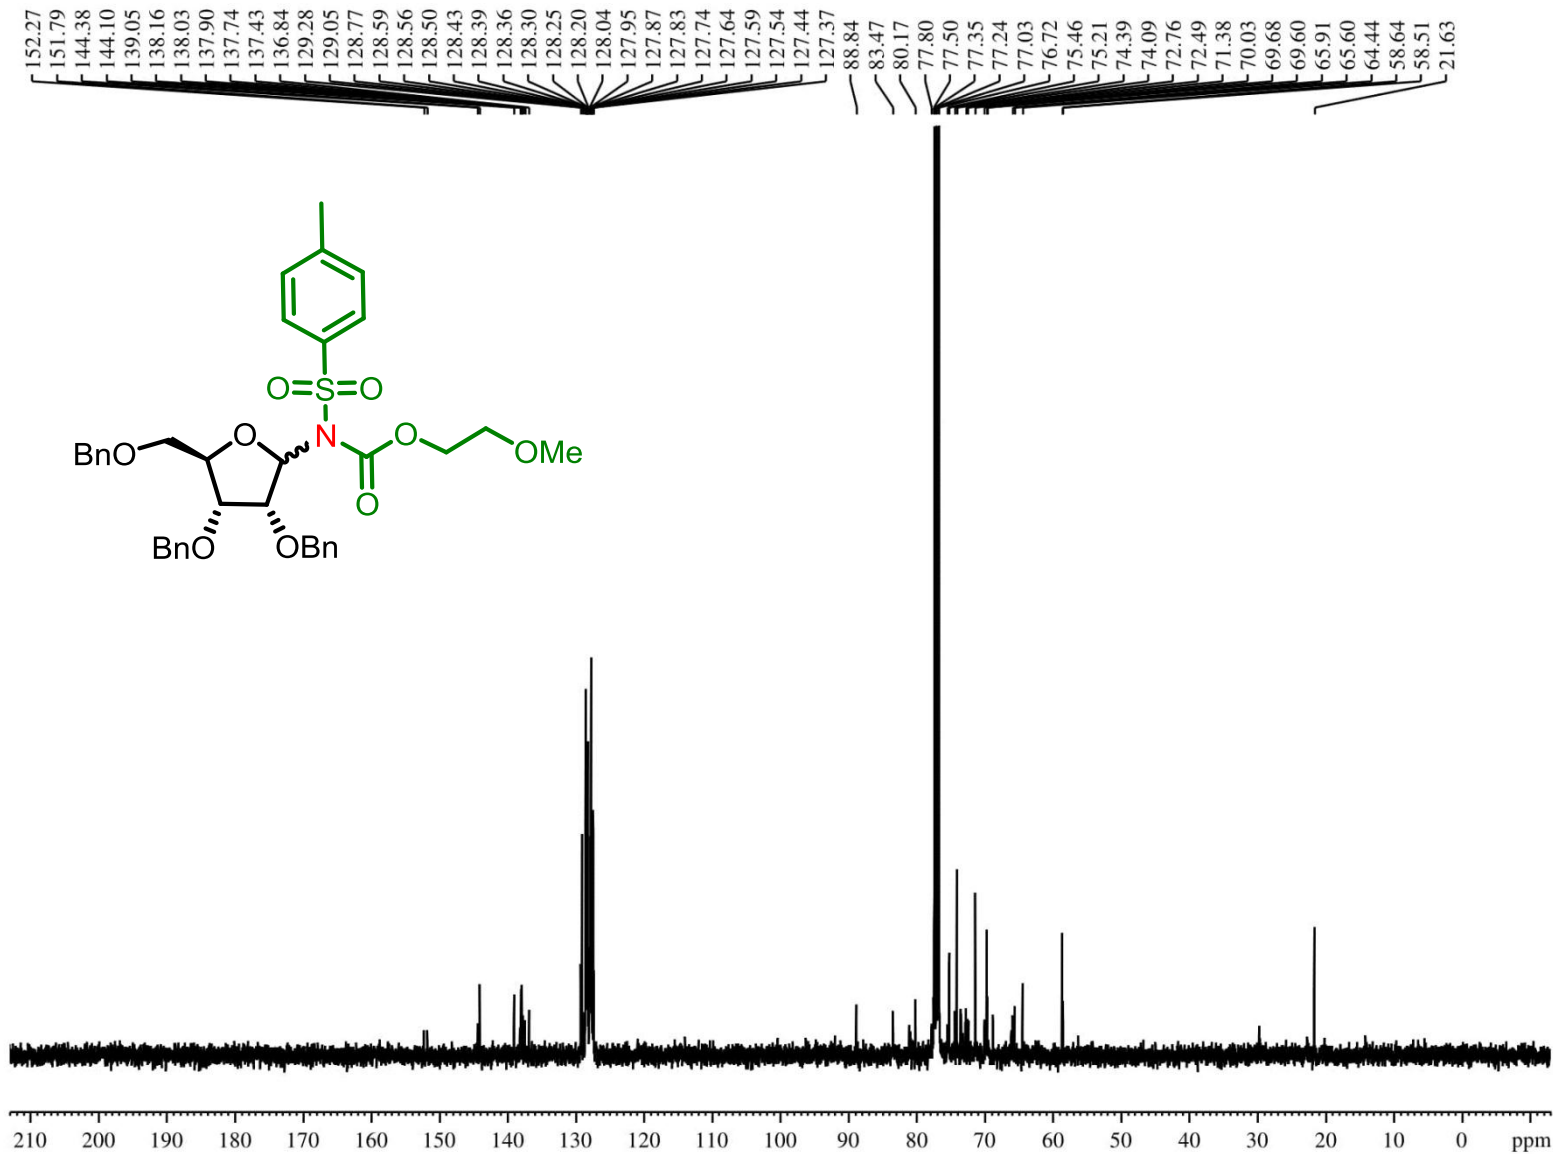

<sup>13</sup>C NMR spectrum of **3v'** (100 MHz, MHz, CDCl<sub>3</sub>)

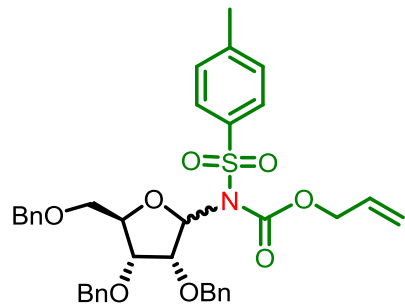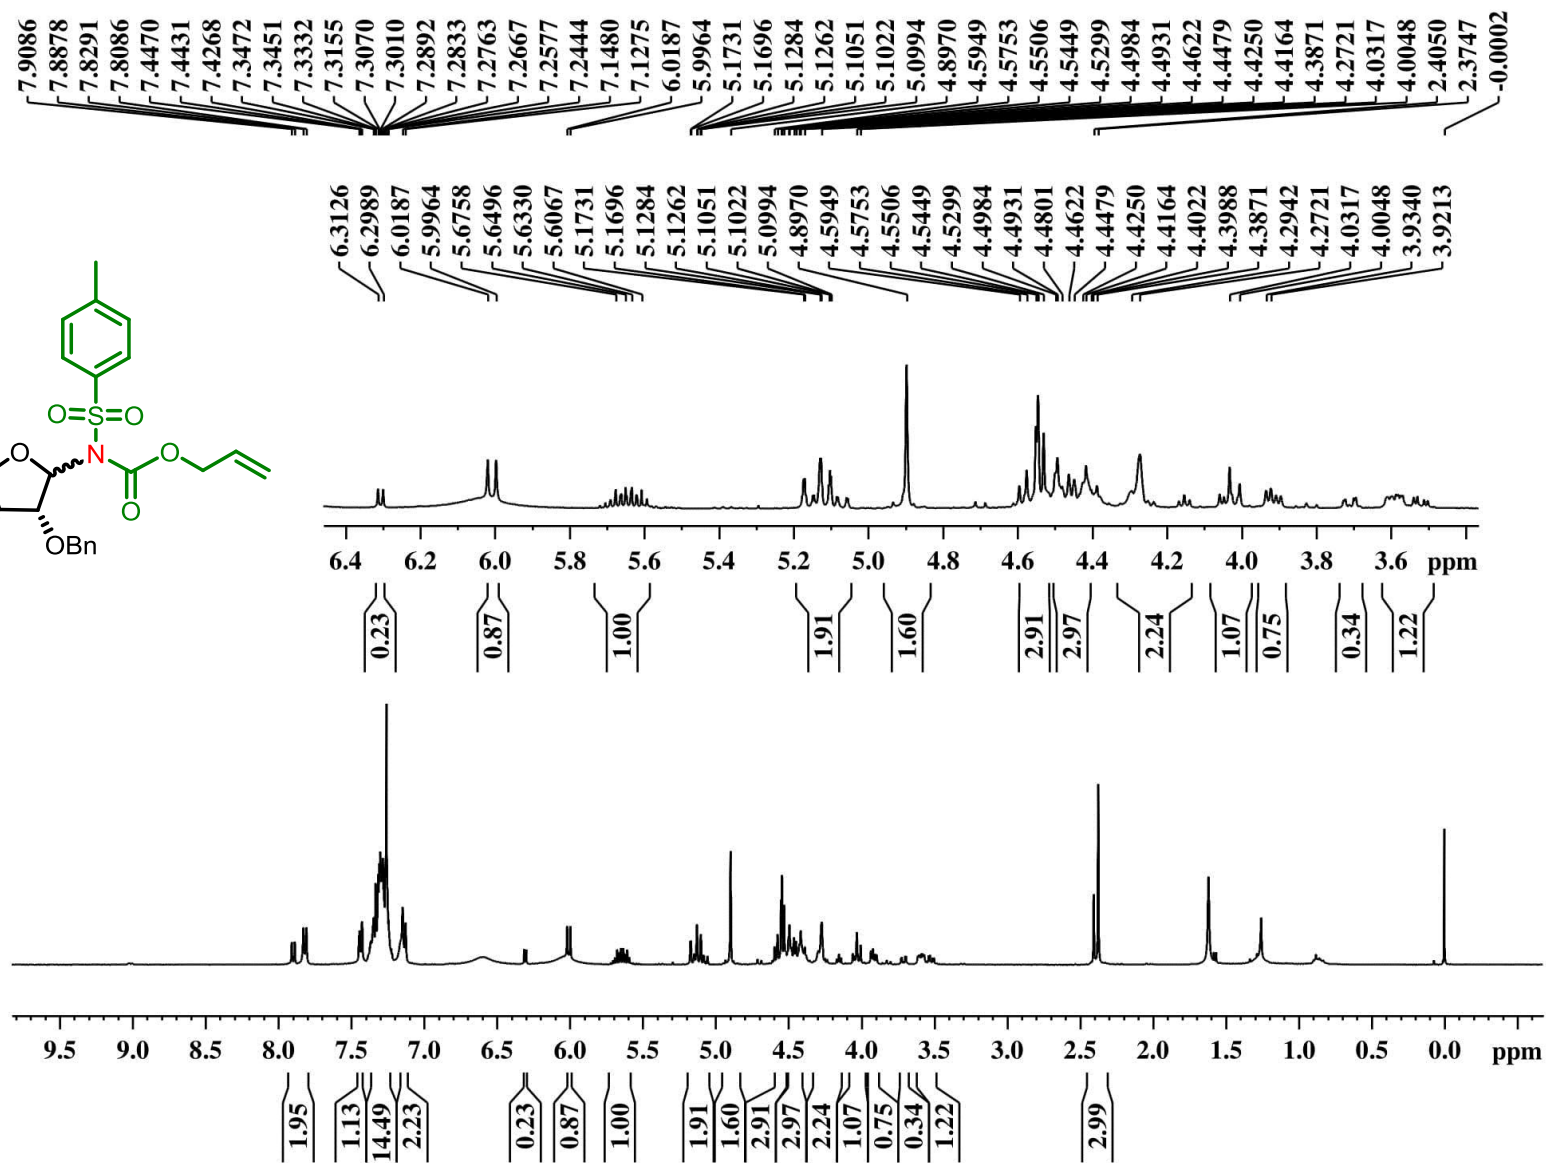

<sup>1</sup>H NMR spectrum of **3w** (400 MHz, CDCl<sub>3</sub>)

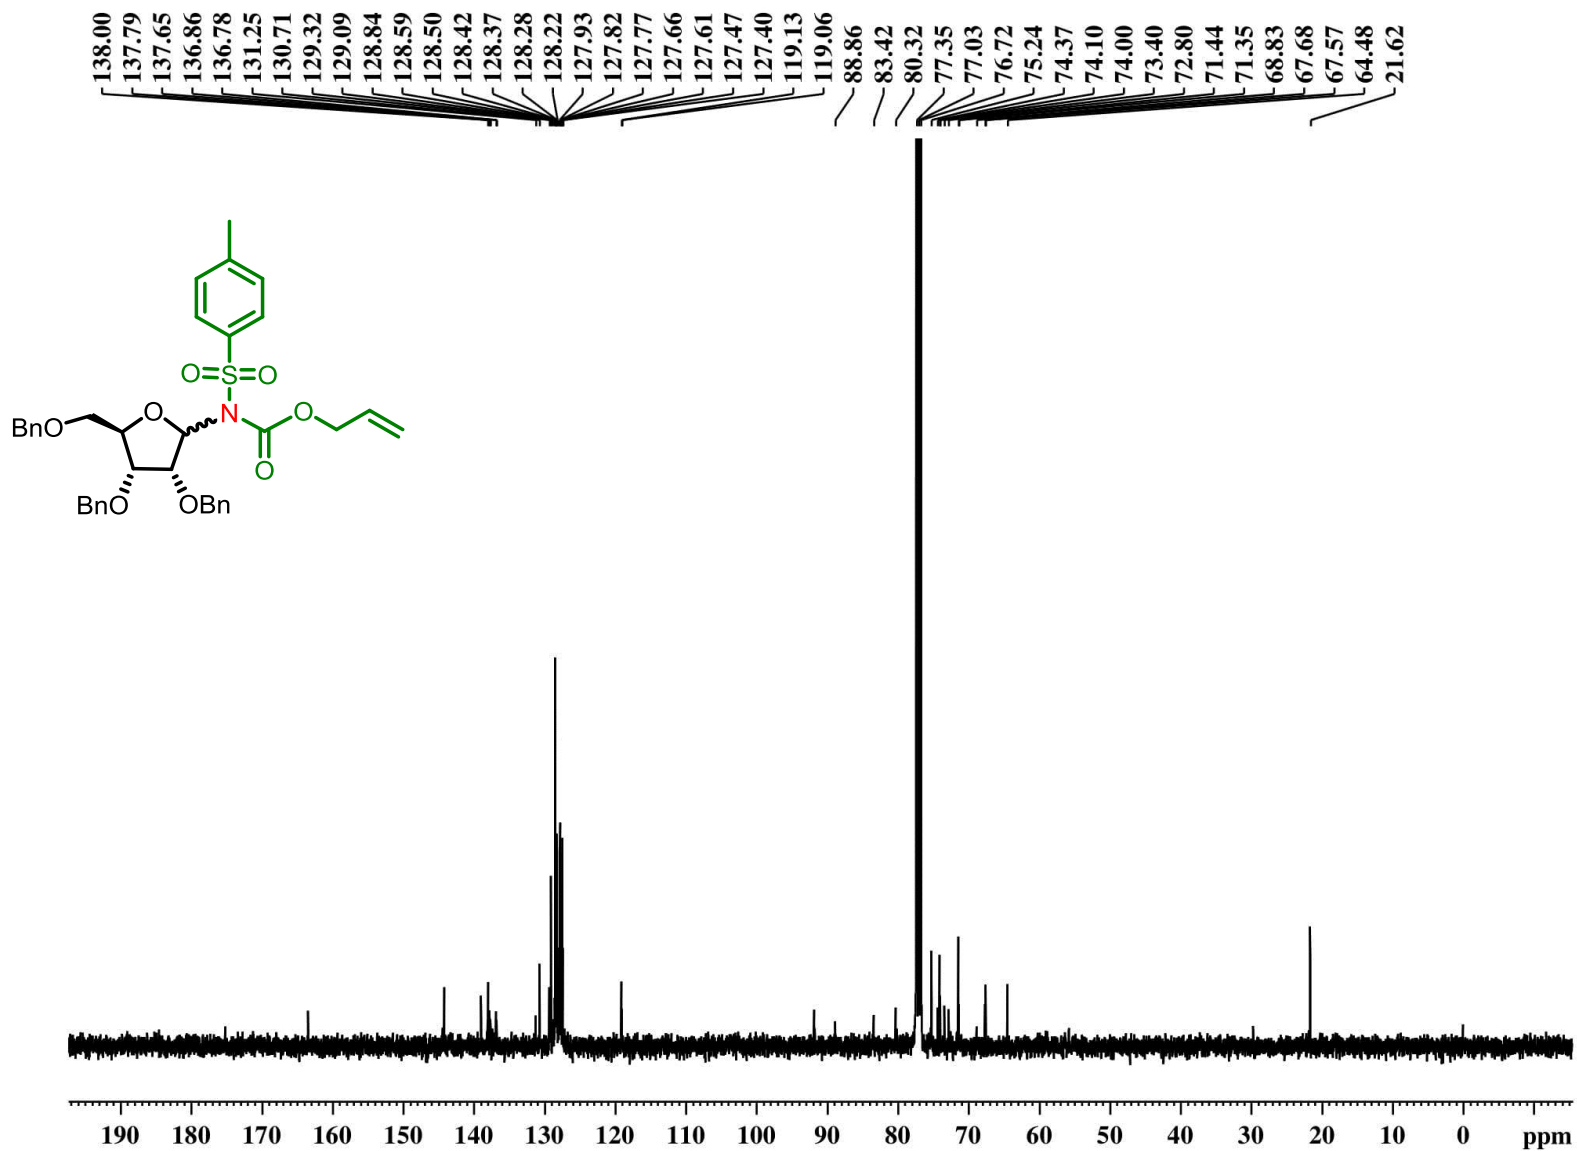

$^{13}\text{C}$  NMR spectrum of **3w** (100 MHz,  $\text{CDCl}_3$ )

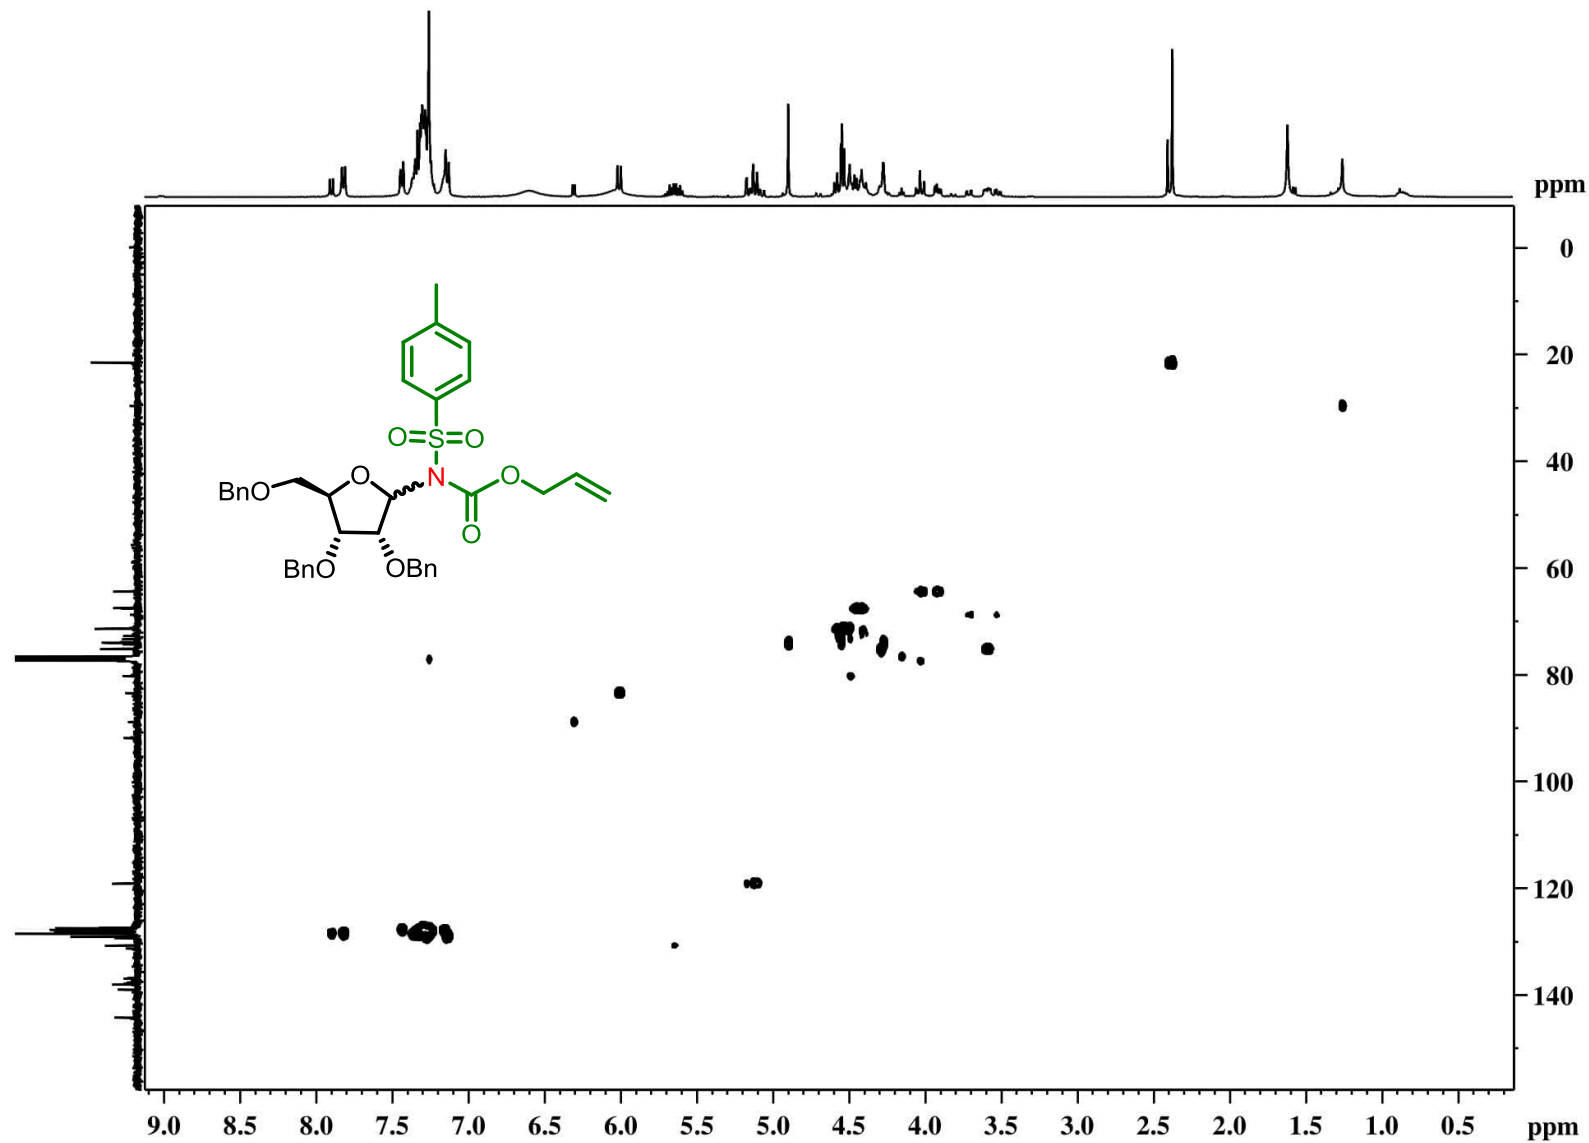

2D HSQC spectrum of **3w** (CDCl<sub>3</sub>).

HRMS20I04MAR09 #19-29 RT: 0.14-0.22 AV: 11 SB: 7 0.02-0.07 NL: 1.50E7  
T: FTMS + p ESI Full ms [100.00-1500.00]

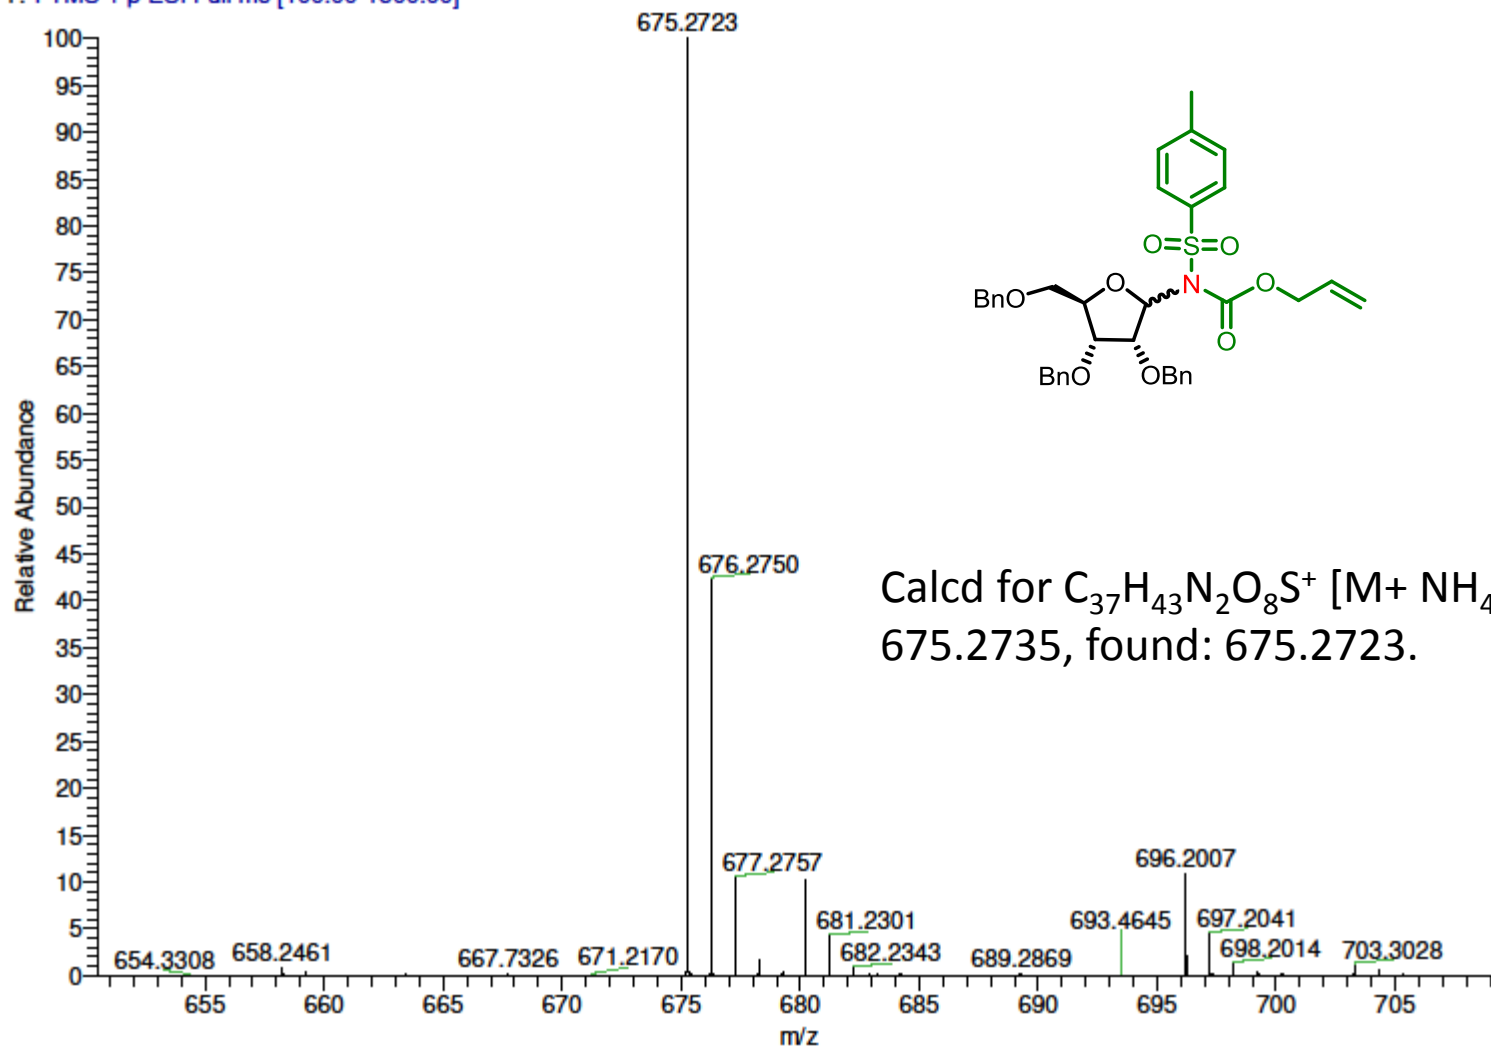HRMS of **3w**

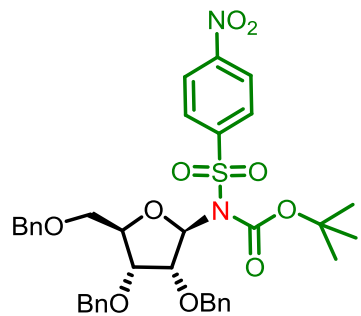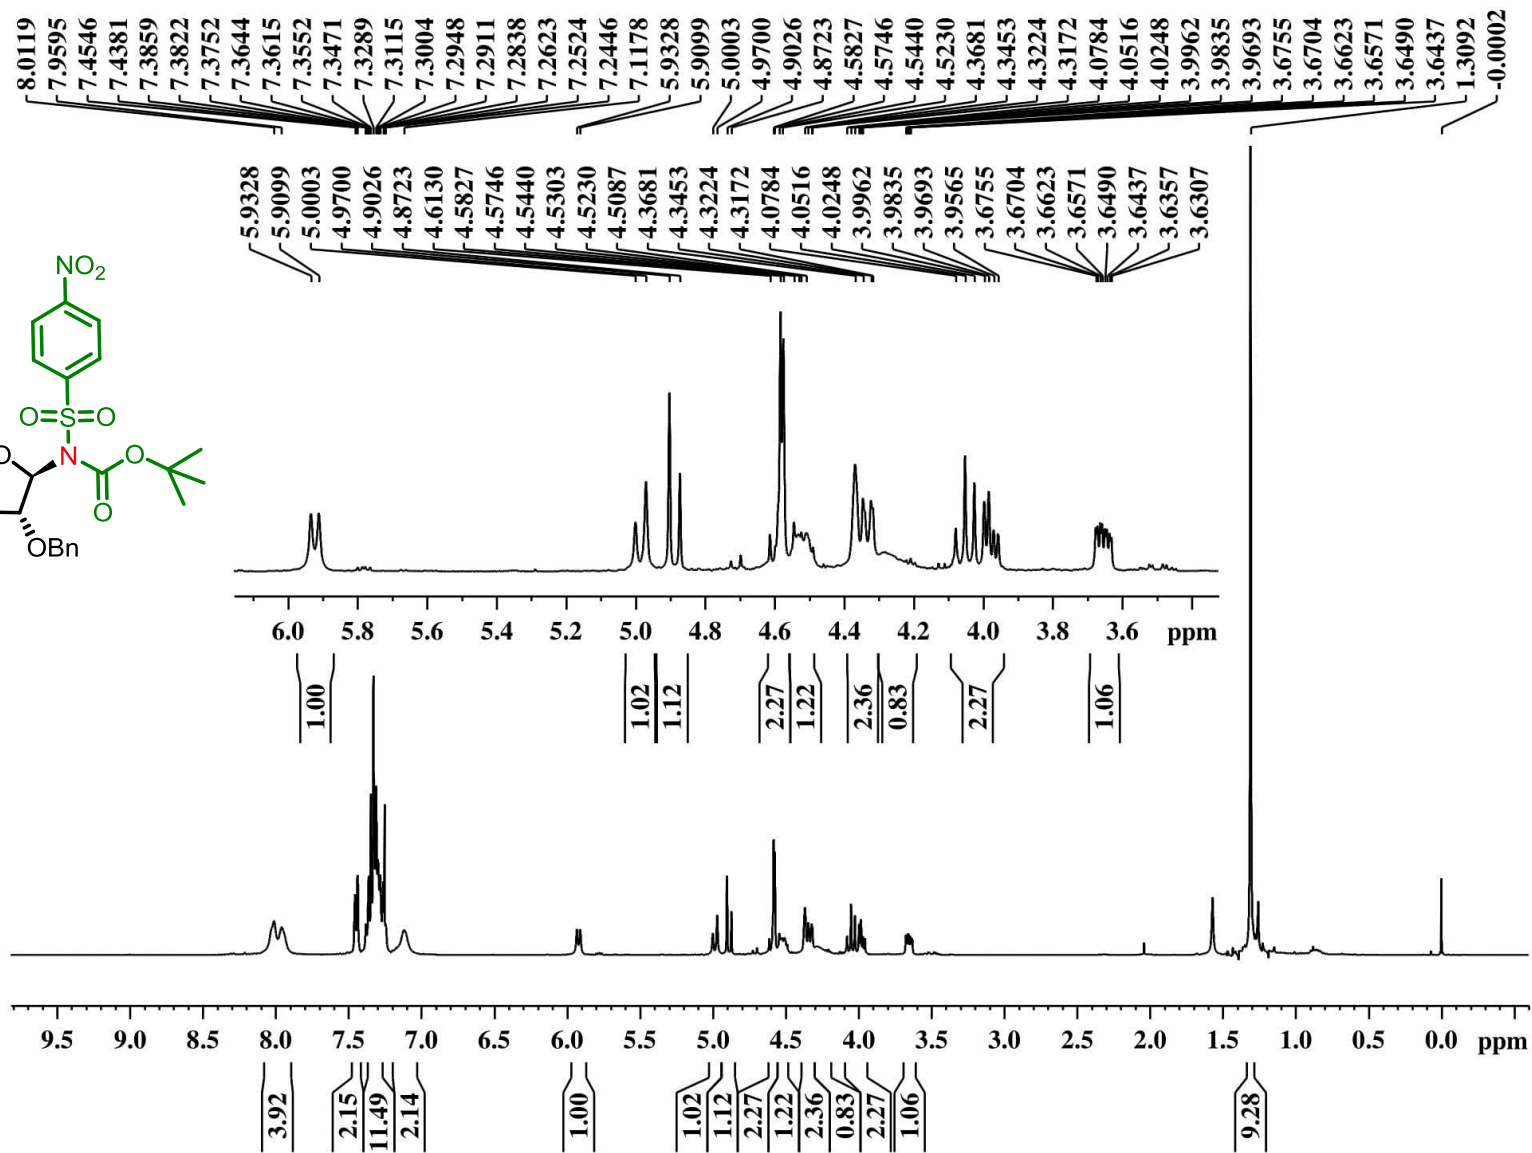



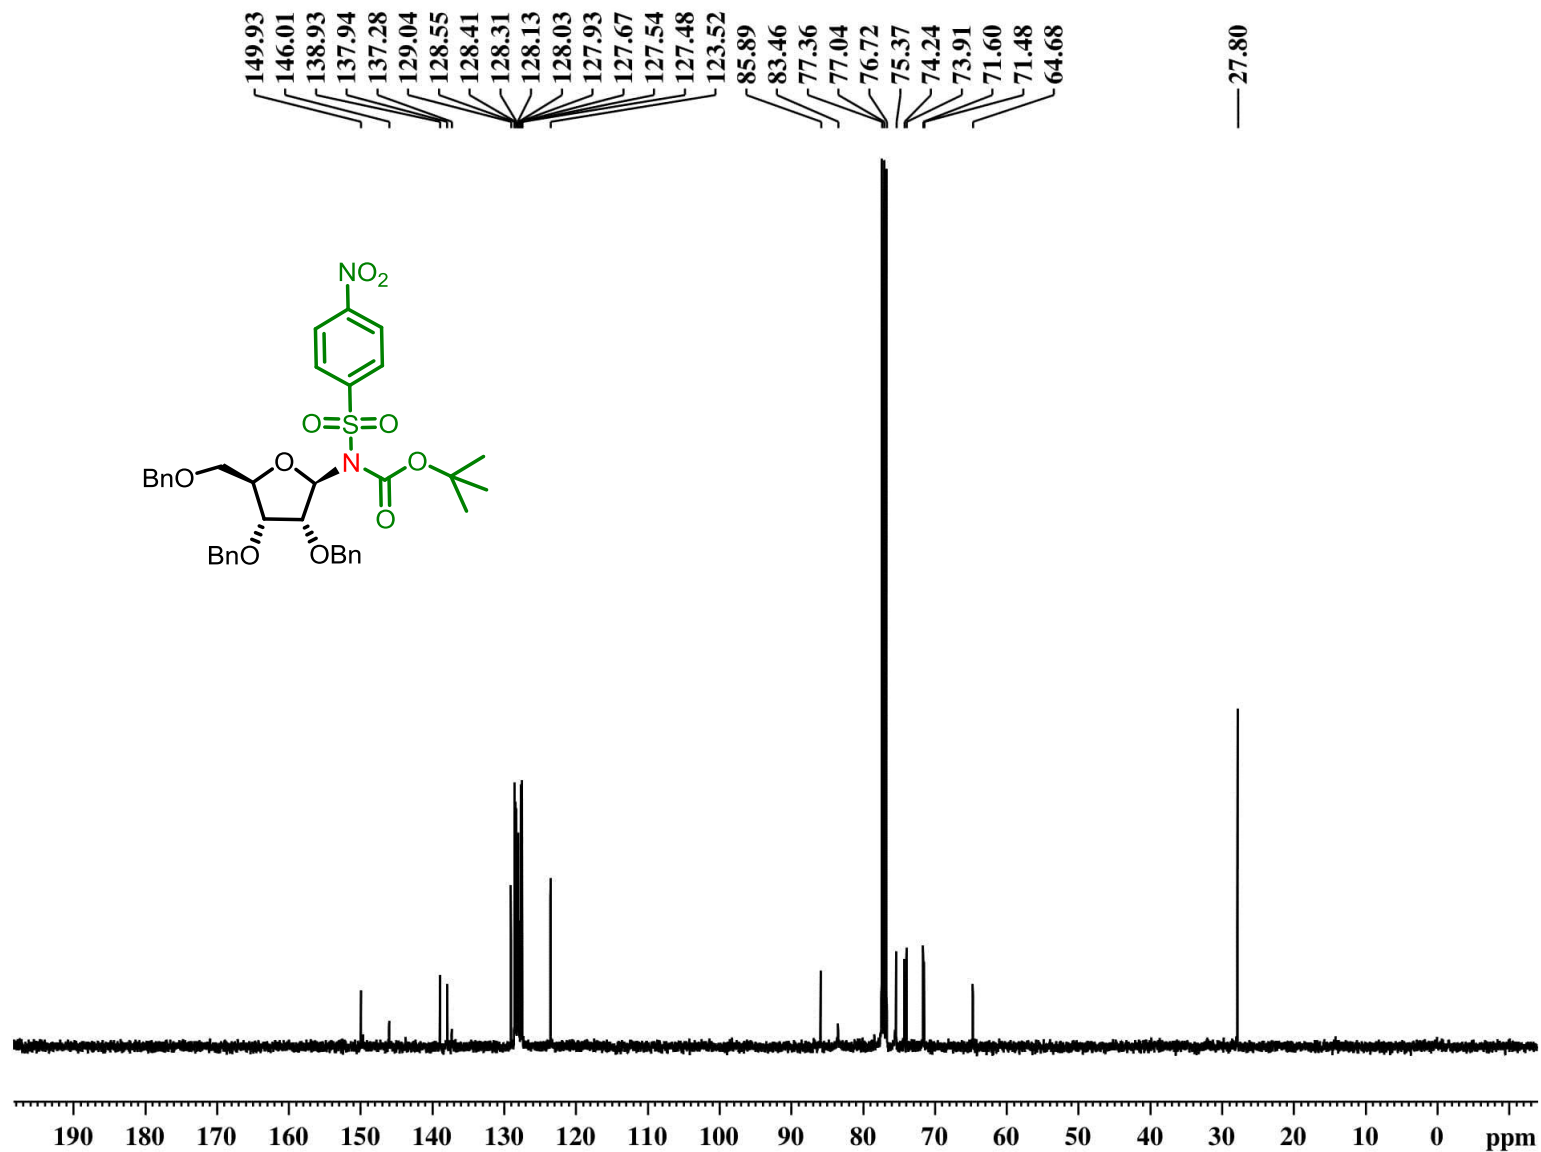

<sup>13</sup>C NMR spectrum of **3x** (100 MHz, MHz, CDCl<sub>3</sub>)

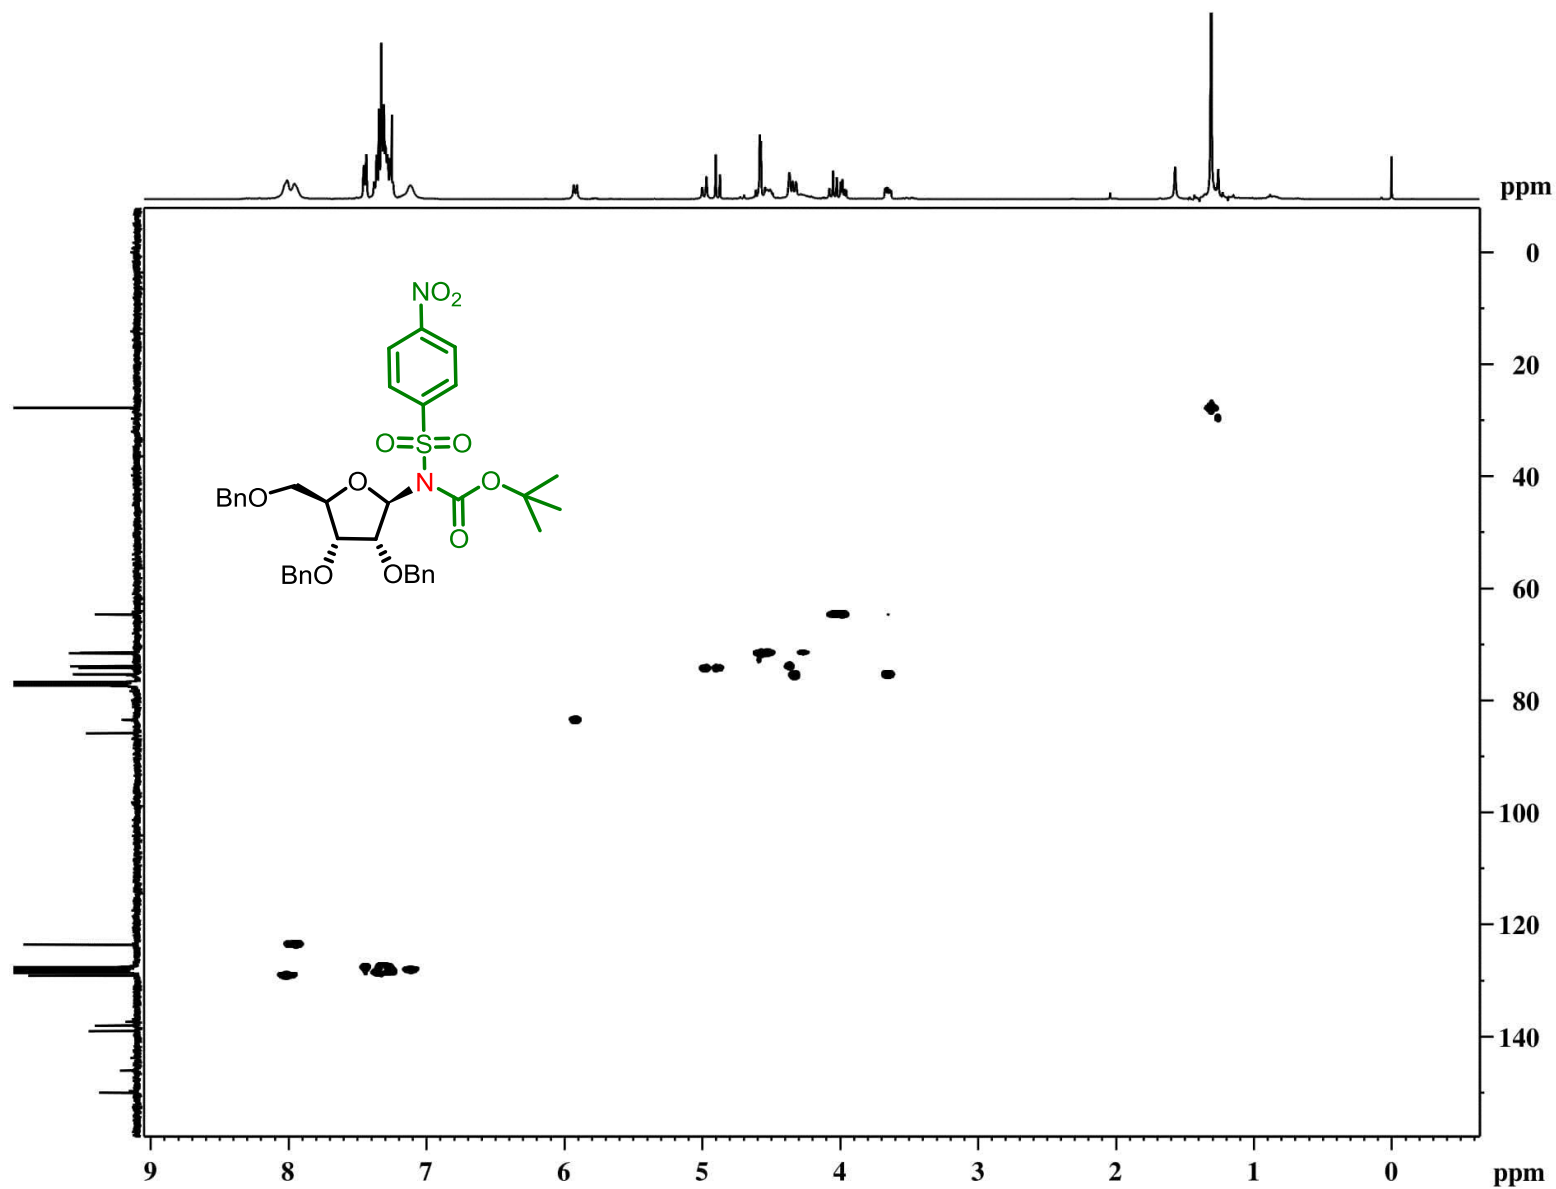

2D HSQC spectrum of **3x** (CDCl<sub>3</sub>).

HRMS20130JAN03 #20-34 RT: 0.15-0.26 AV: 15 NL: 7.66E5

T: FTMS + p ESI Full ms [100.00-1500.00]

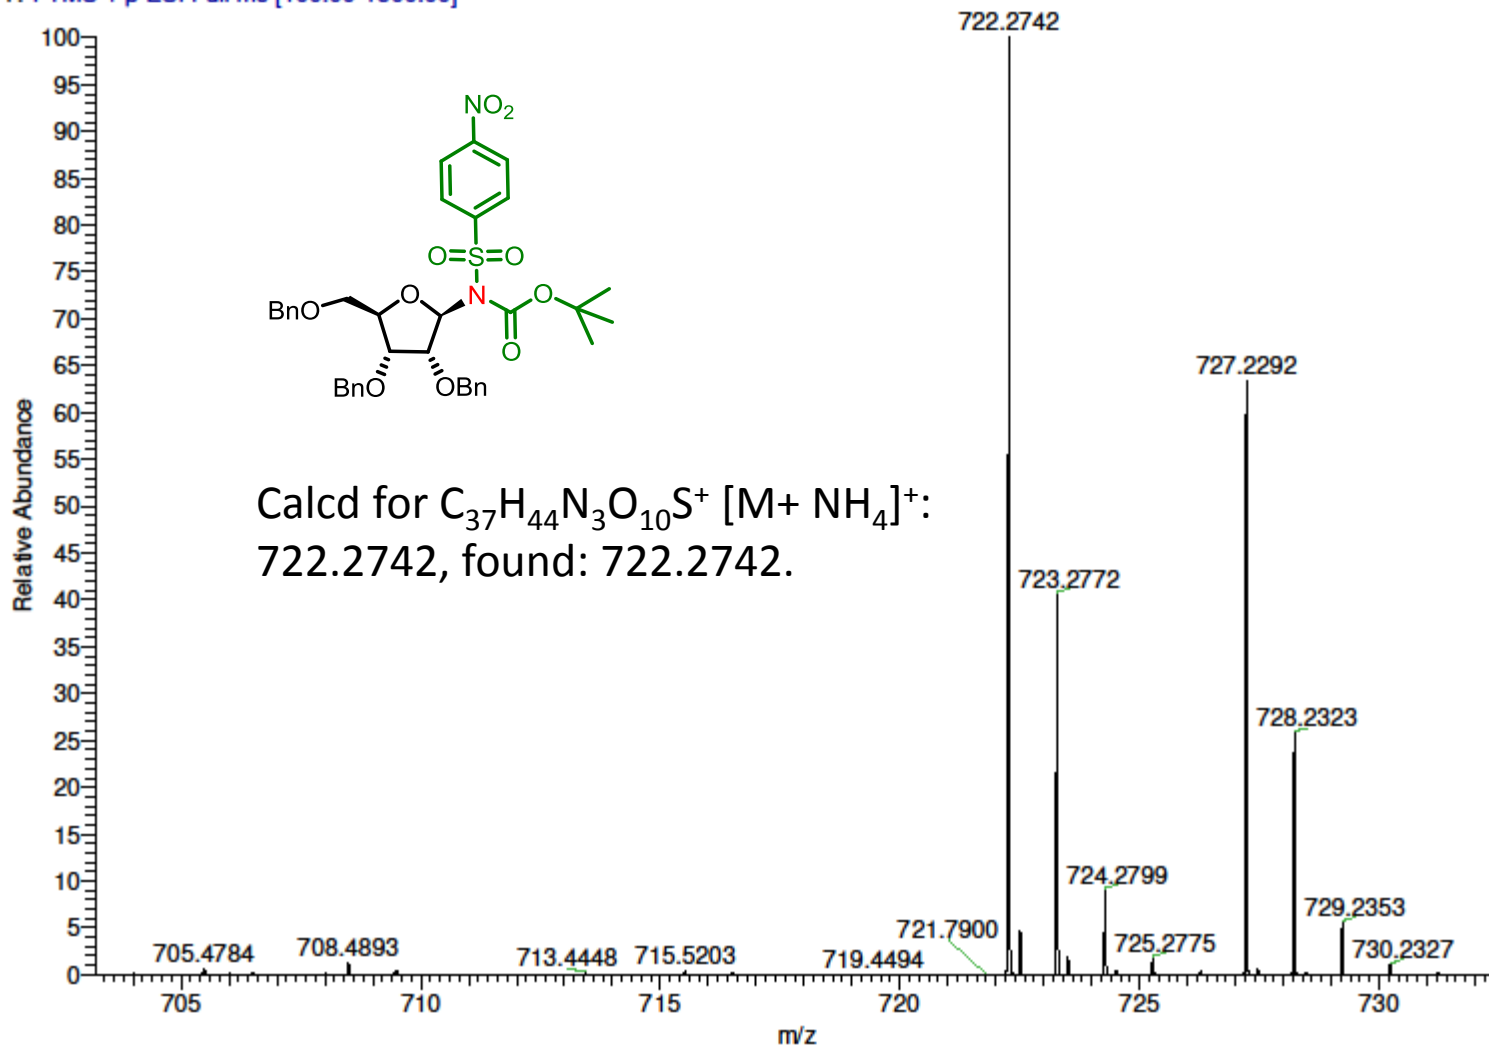

HRMS of 3x

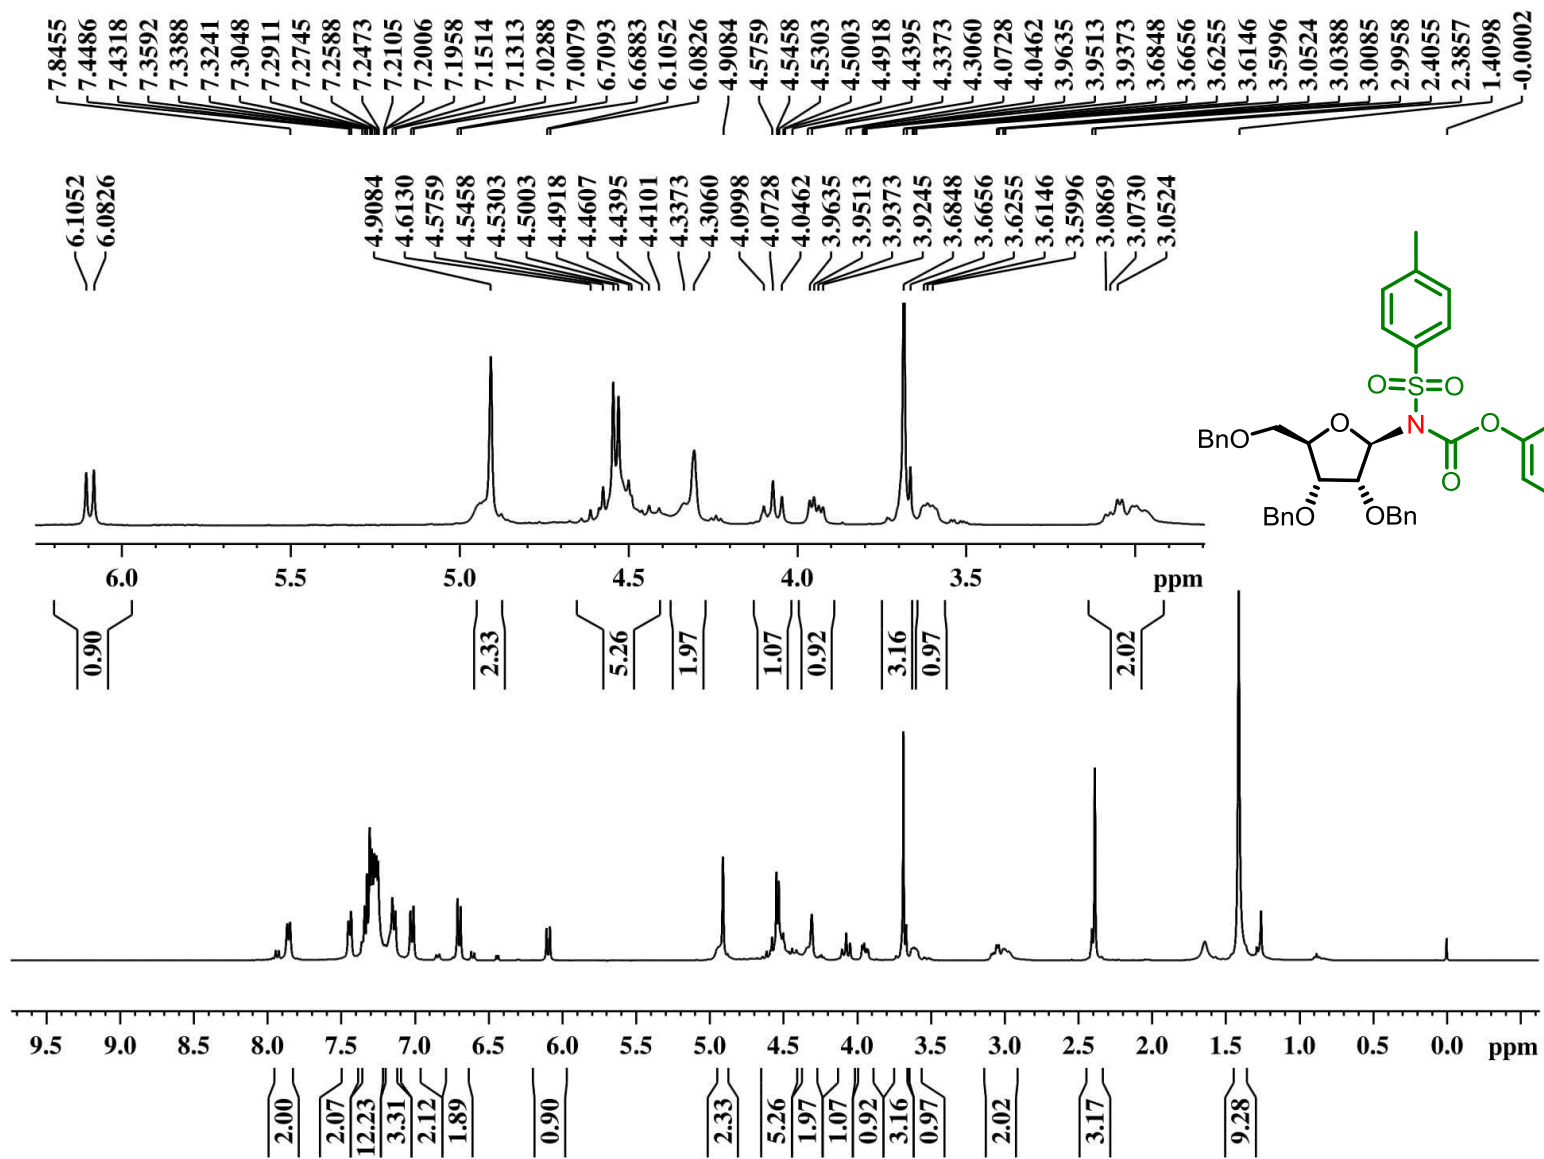

**<sup>1</sup>H NMR spectrum of **3y** (400 MHz, CDCl<sub>3</sub>)**

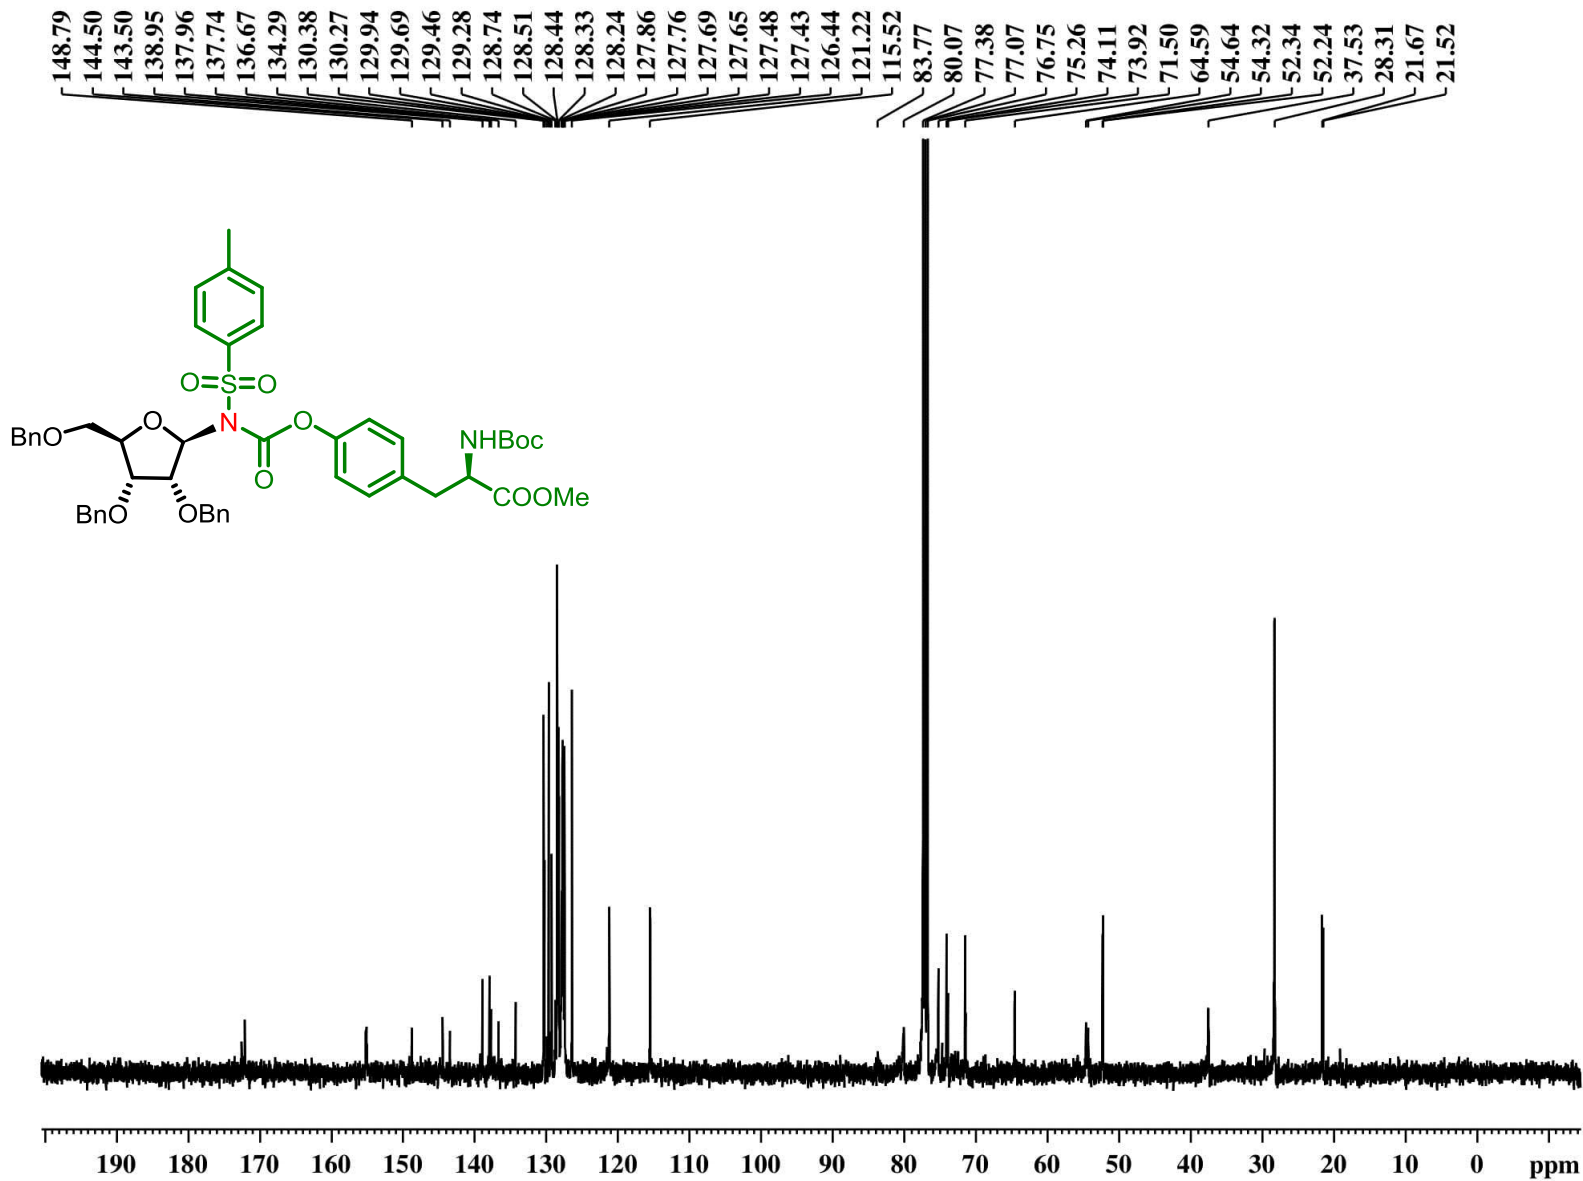

$^{13}\text{C}$  NMR spectrum of **3y** (100 MHz,  $\text{CDCl}_3$ )

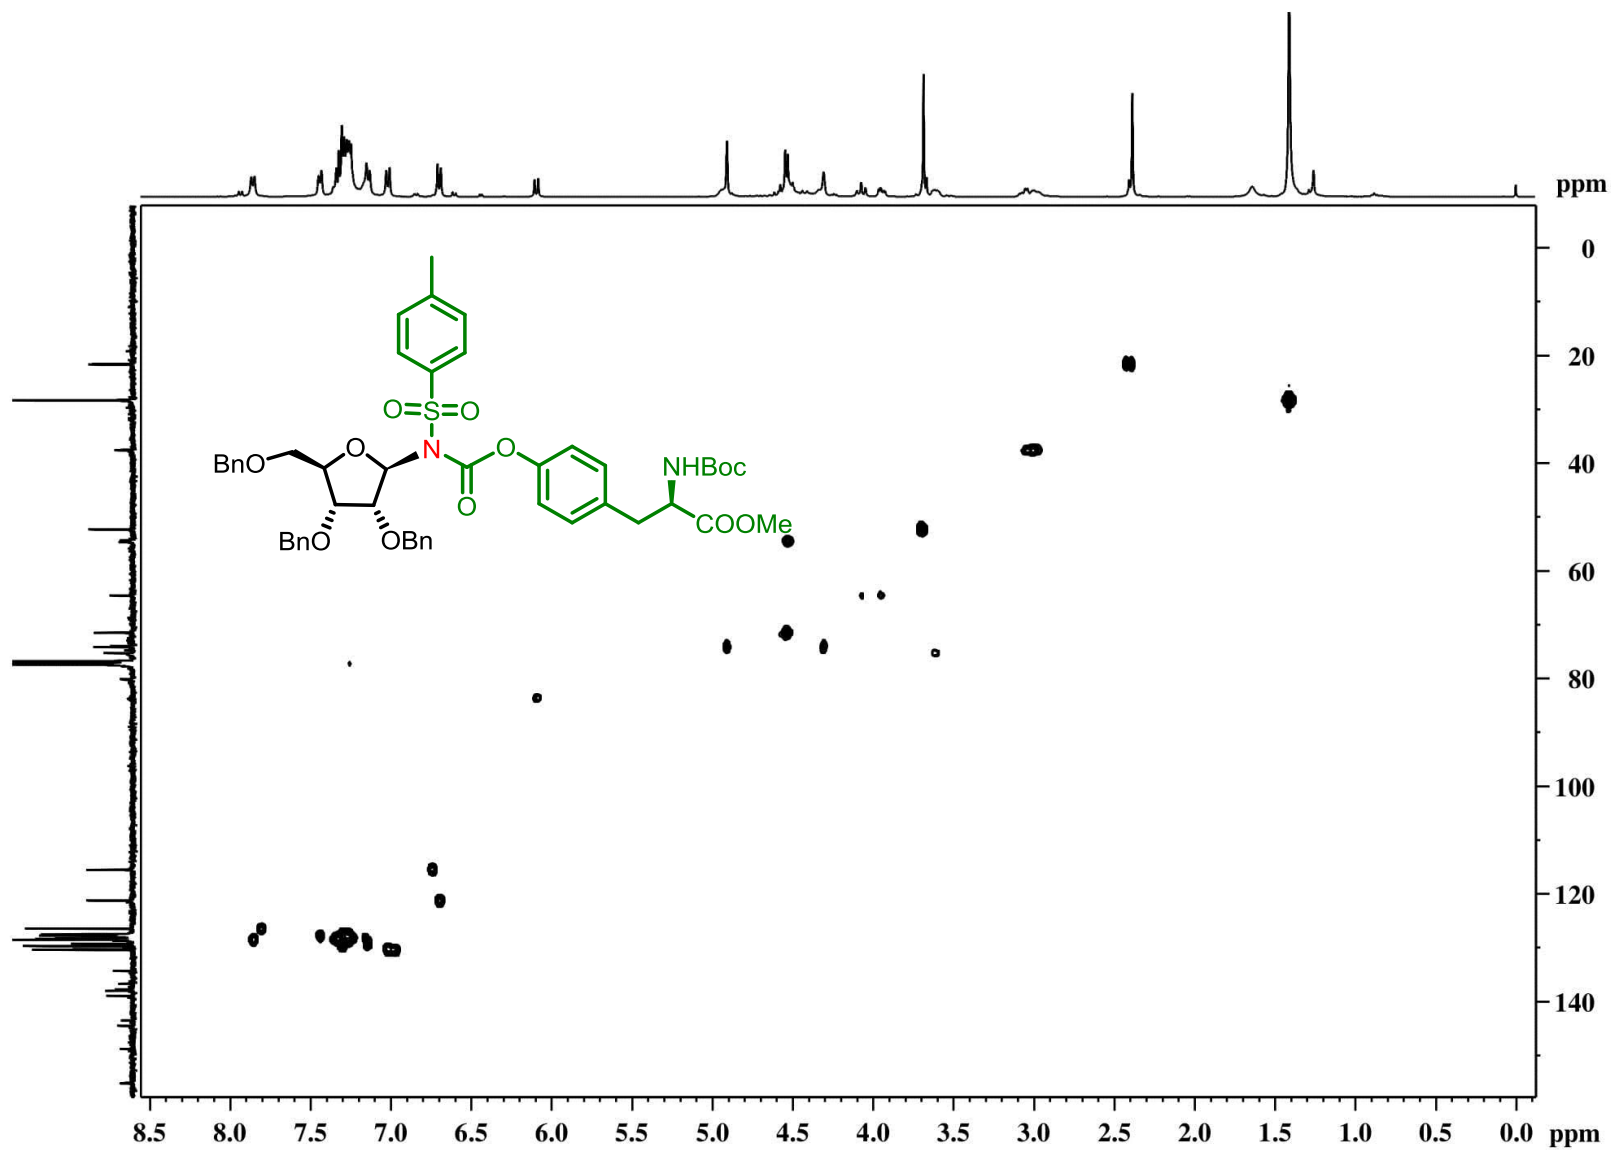

2D HSQC spectrum of **3y** ( $\text{CDCl}_3$ ).

HRMS20I04MAR13 #20-30 RT: 0.15-0.22 AV: 11 SB: 7 0.02-0.07 NL: 9.34E6  
T: FTMS + p ESI Full ms [100.00-1500.00]

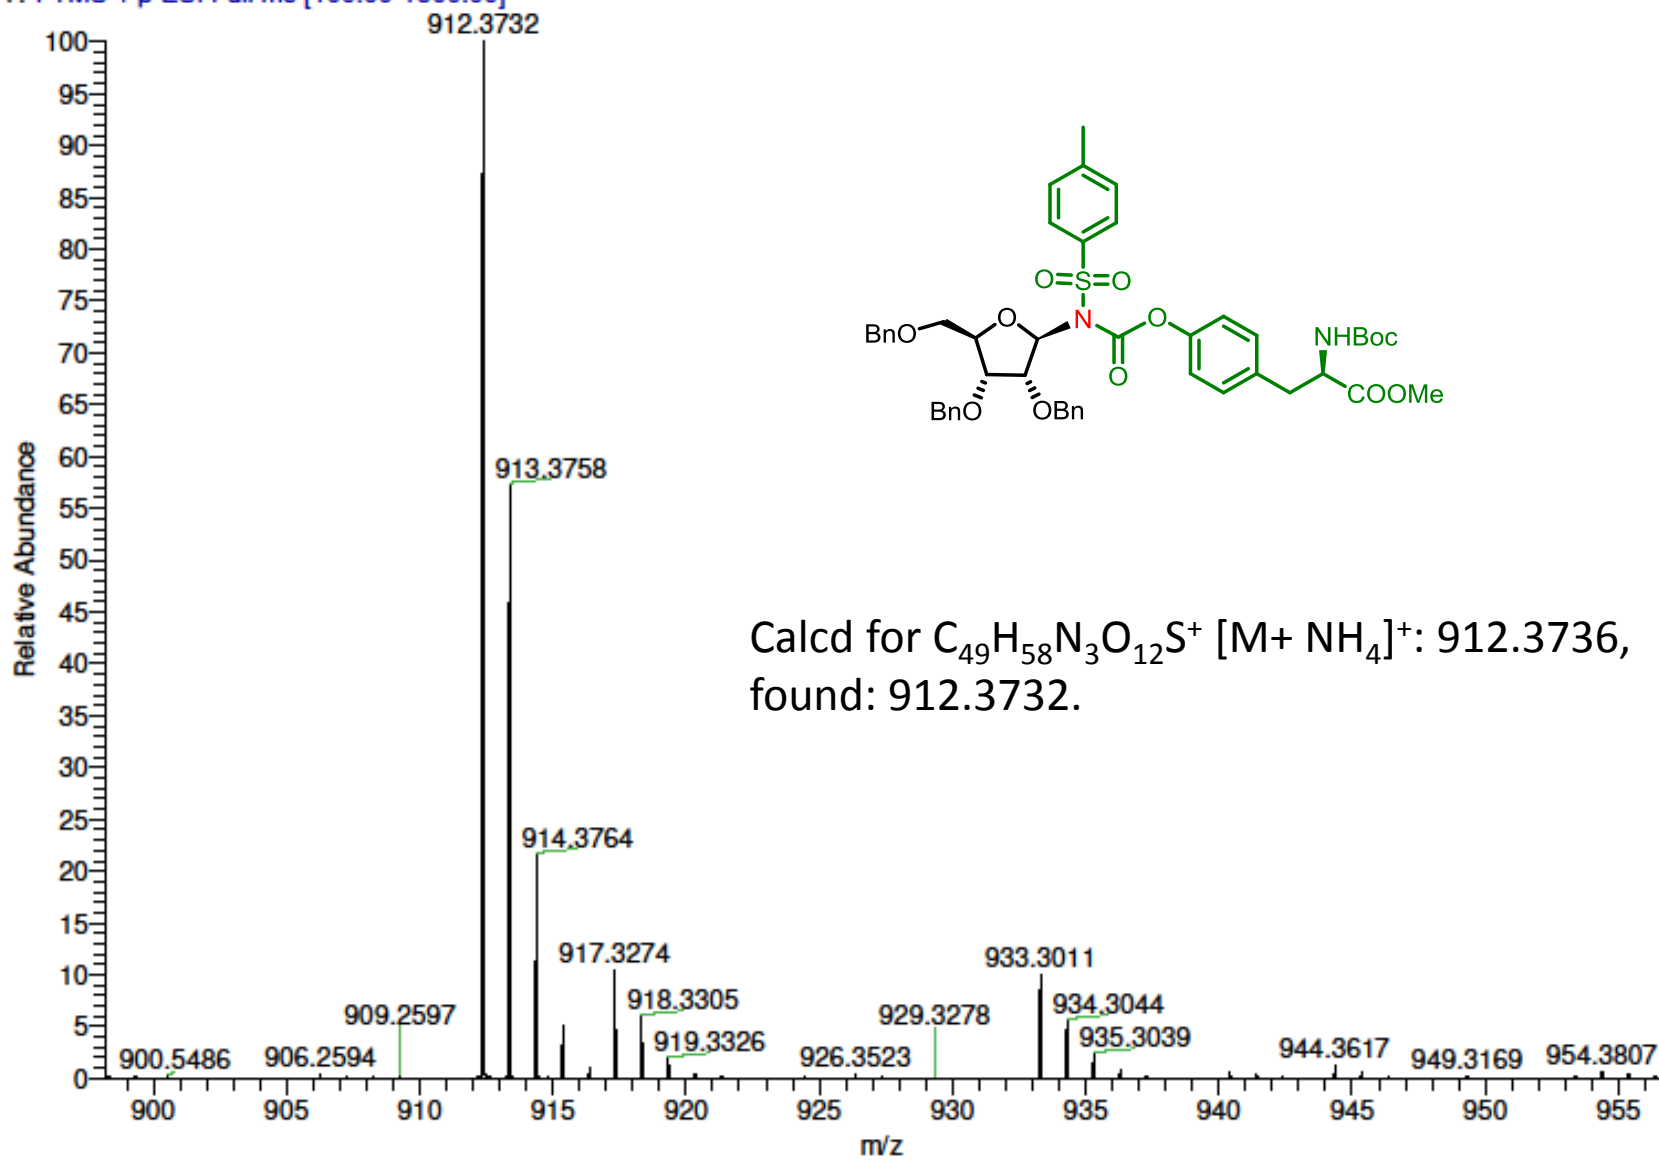HRMS of **3y**





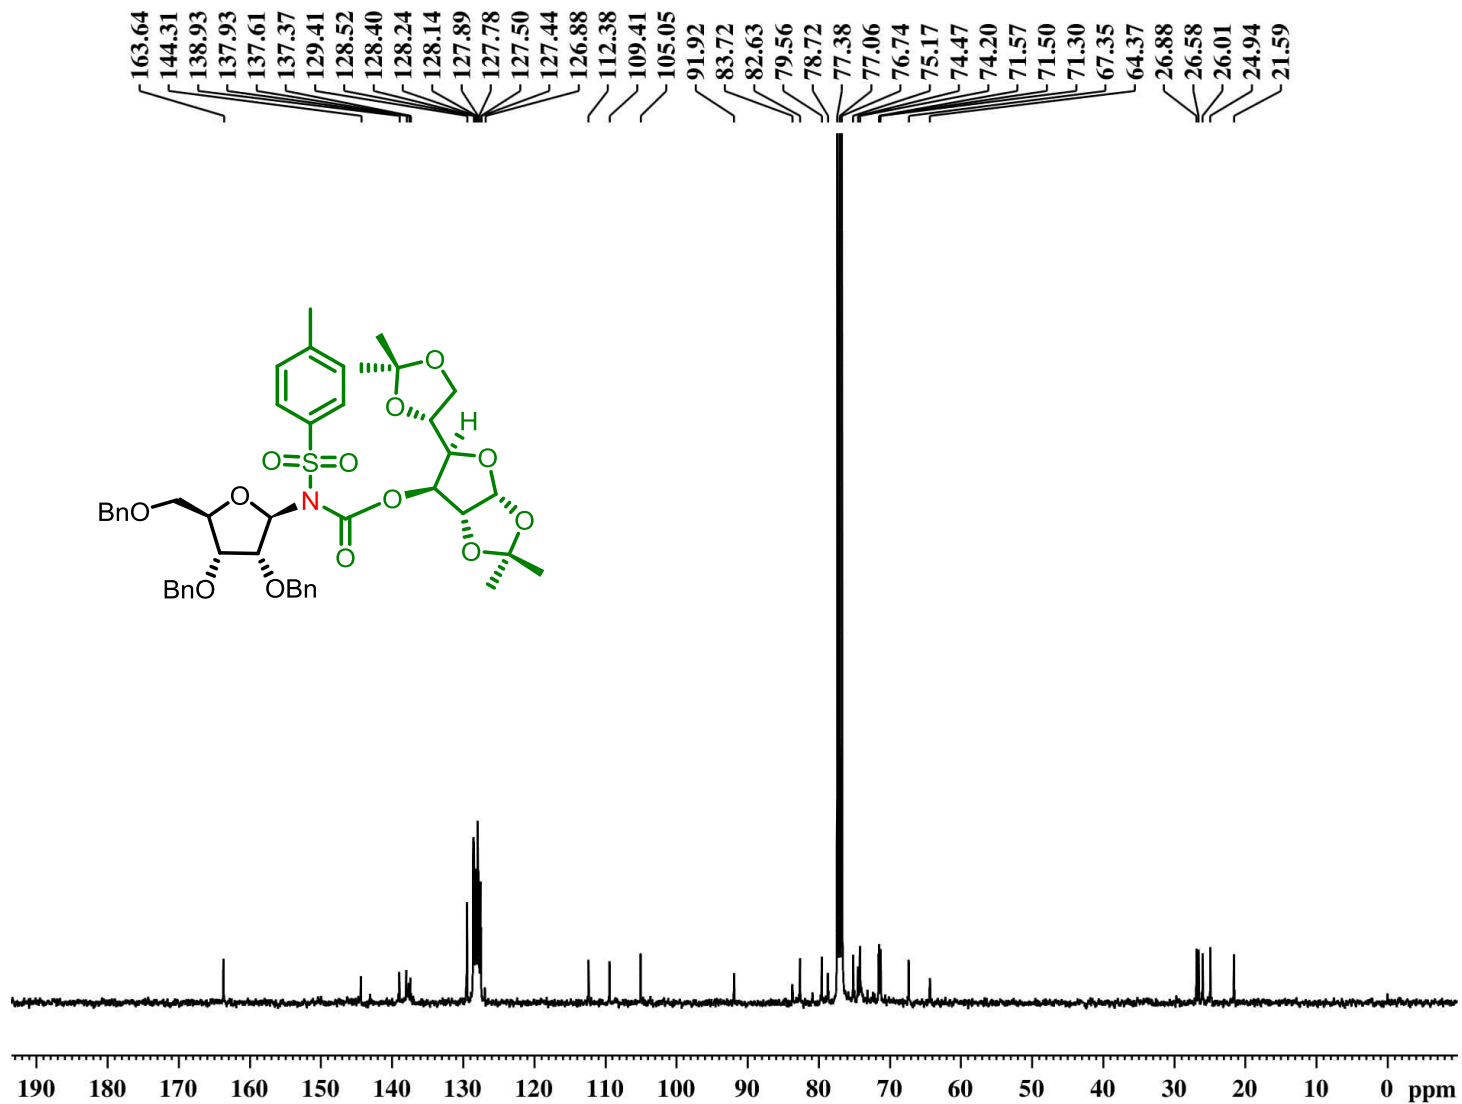

<sup>13</sup>C NMR spectrum of **3z** (100 MHz, MHz, CDCl<sub>3</sub>)

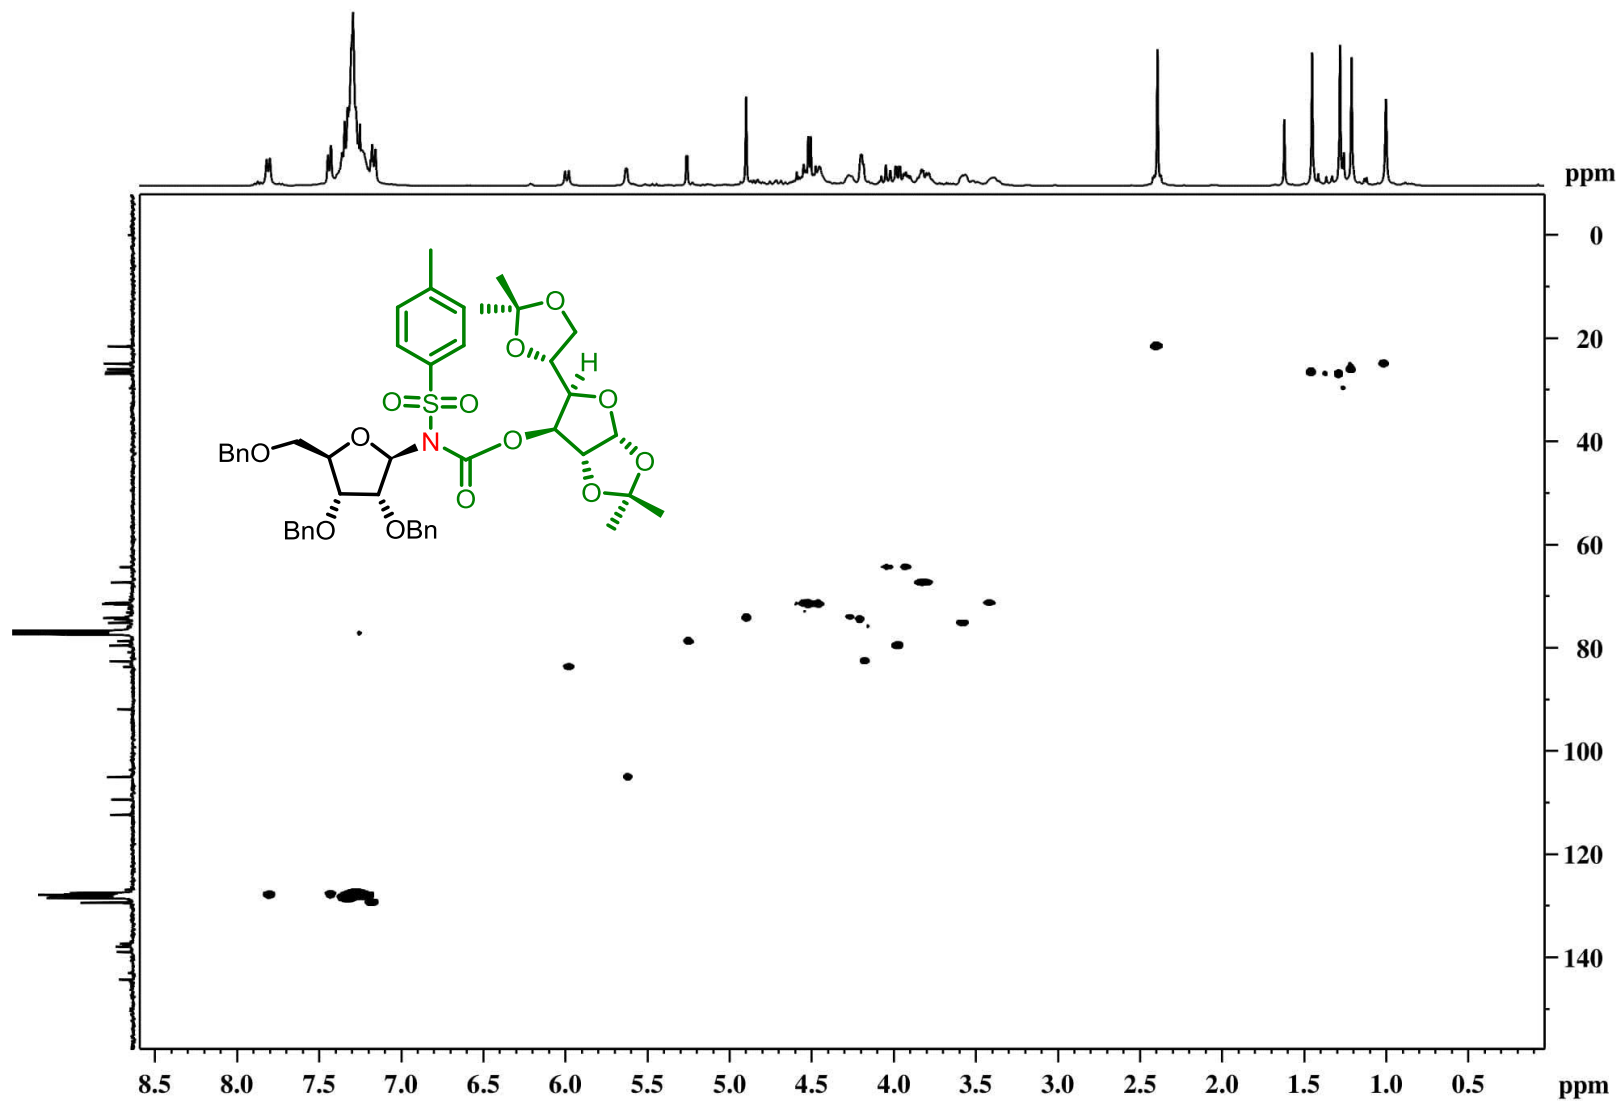

2D HSQC spectrum of **3z** (CDCl<sub>3</sub>).

## SAIF [HRMS Report]

|                   |                      |                       |                                  |
|-------------------|----------------------|-----------------------|----------------------------------|
| Data File:        | HRMS20I19AUG01       | Original Data Path:   | D:\INTERNAL NEW\2020\Aug<br>2020 |
| Sample ID:        | PKM-TRG-01           | Sample Name:          |                                  |
| Acquisition Date: | 08/19/20 10:52:14 AM | Run Time(min):        | 0.00                             |
| Vial:             | CStk1-01:01          | Injection Volume(μl): | 1.00                             |

HRMS20I19AUG01 #13-26 RT: 0.11-0.21 AV: 14 SB: 1 0.01 NL: 1.12E7  
T: FTMS + p ESI Full ms [100.00-1500.00]

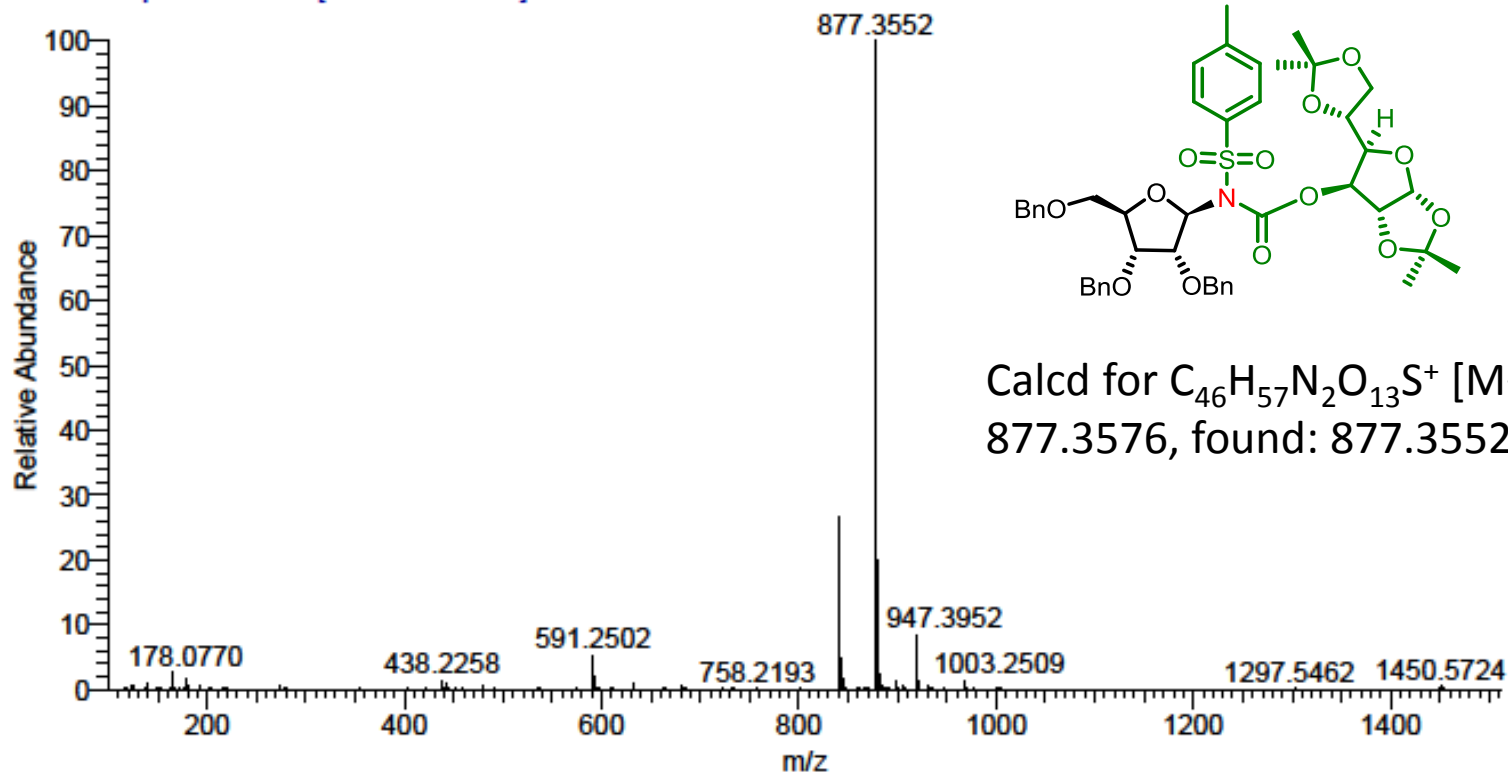

HRMS of **3z**

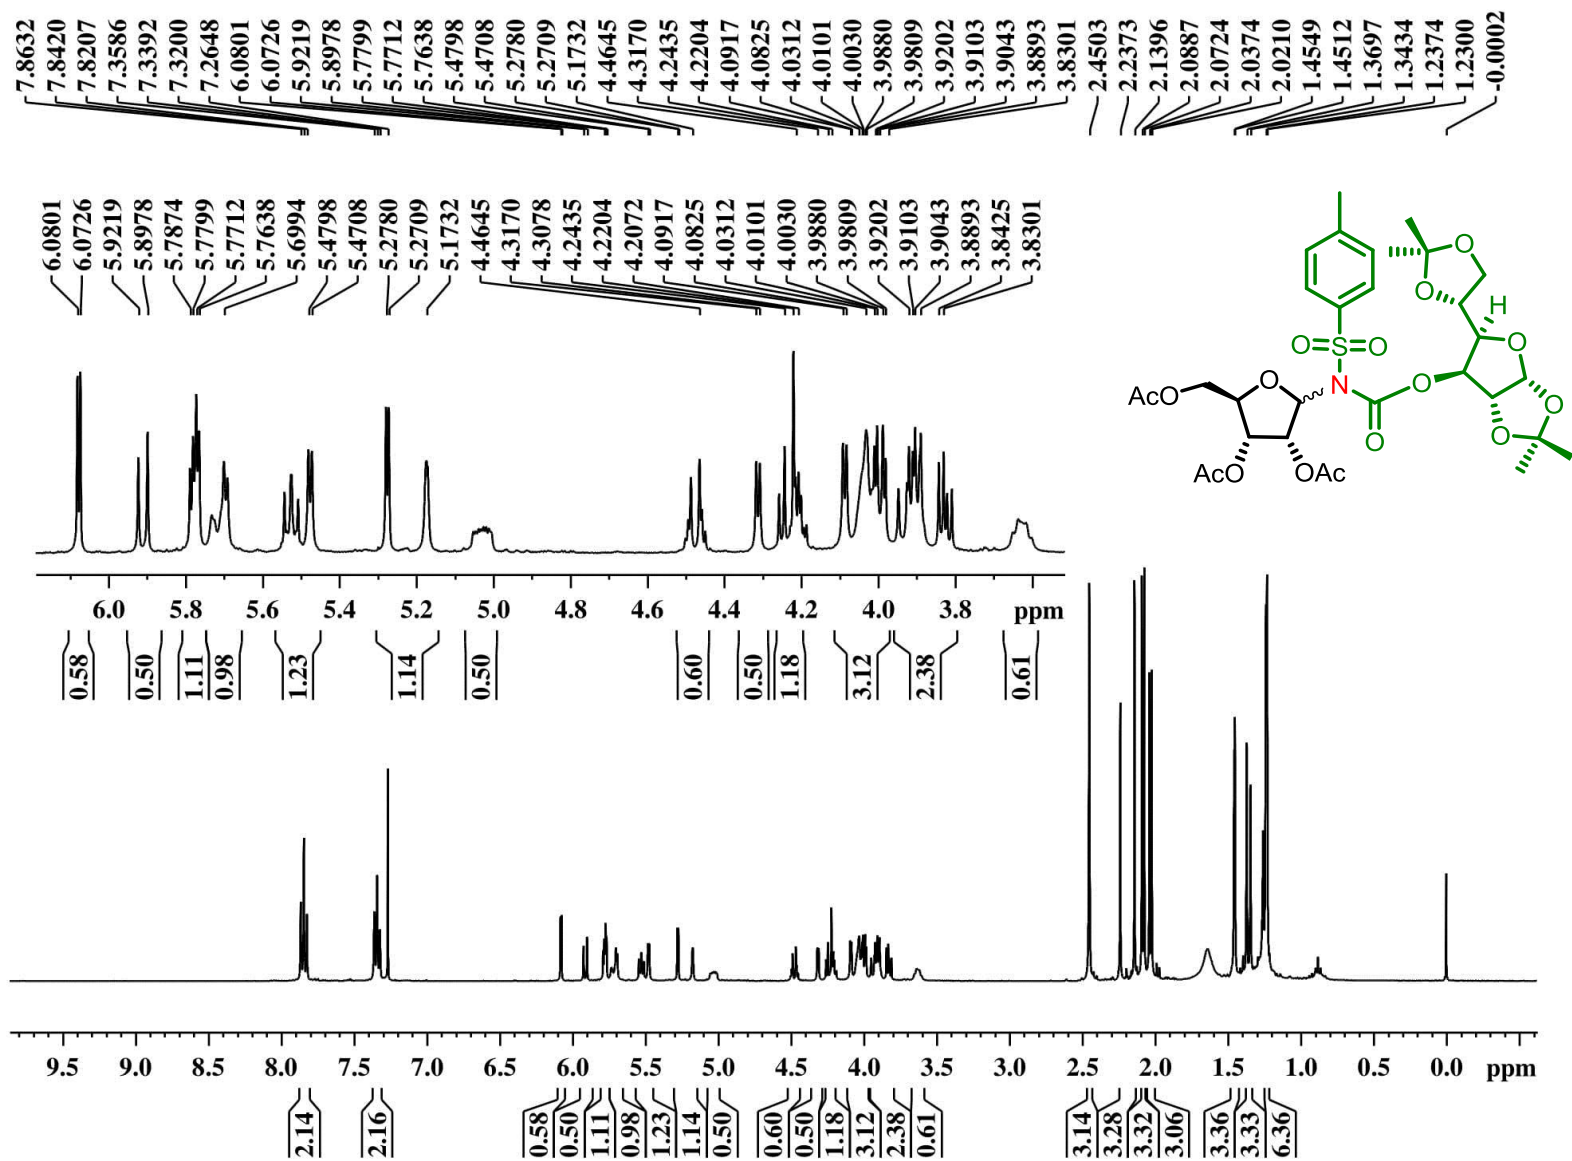

<sup>1</sup>H NMR spectrum of **3aa** (400 MHz, CDCl<sub>3</sub>)

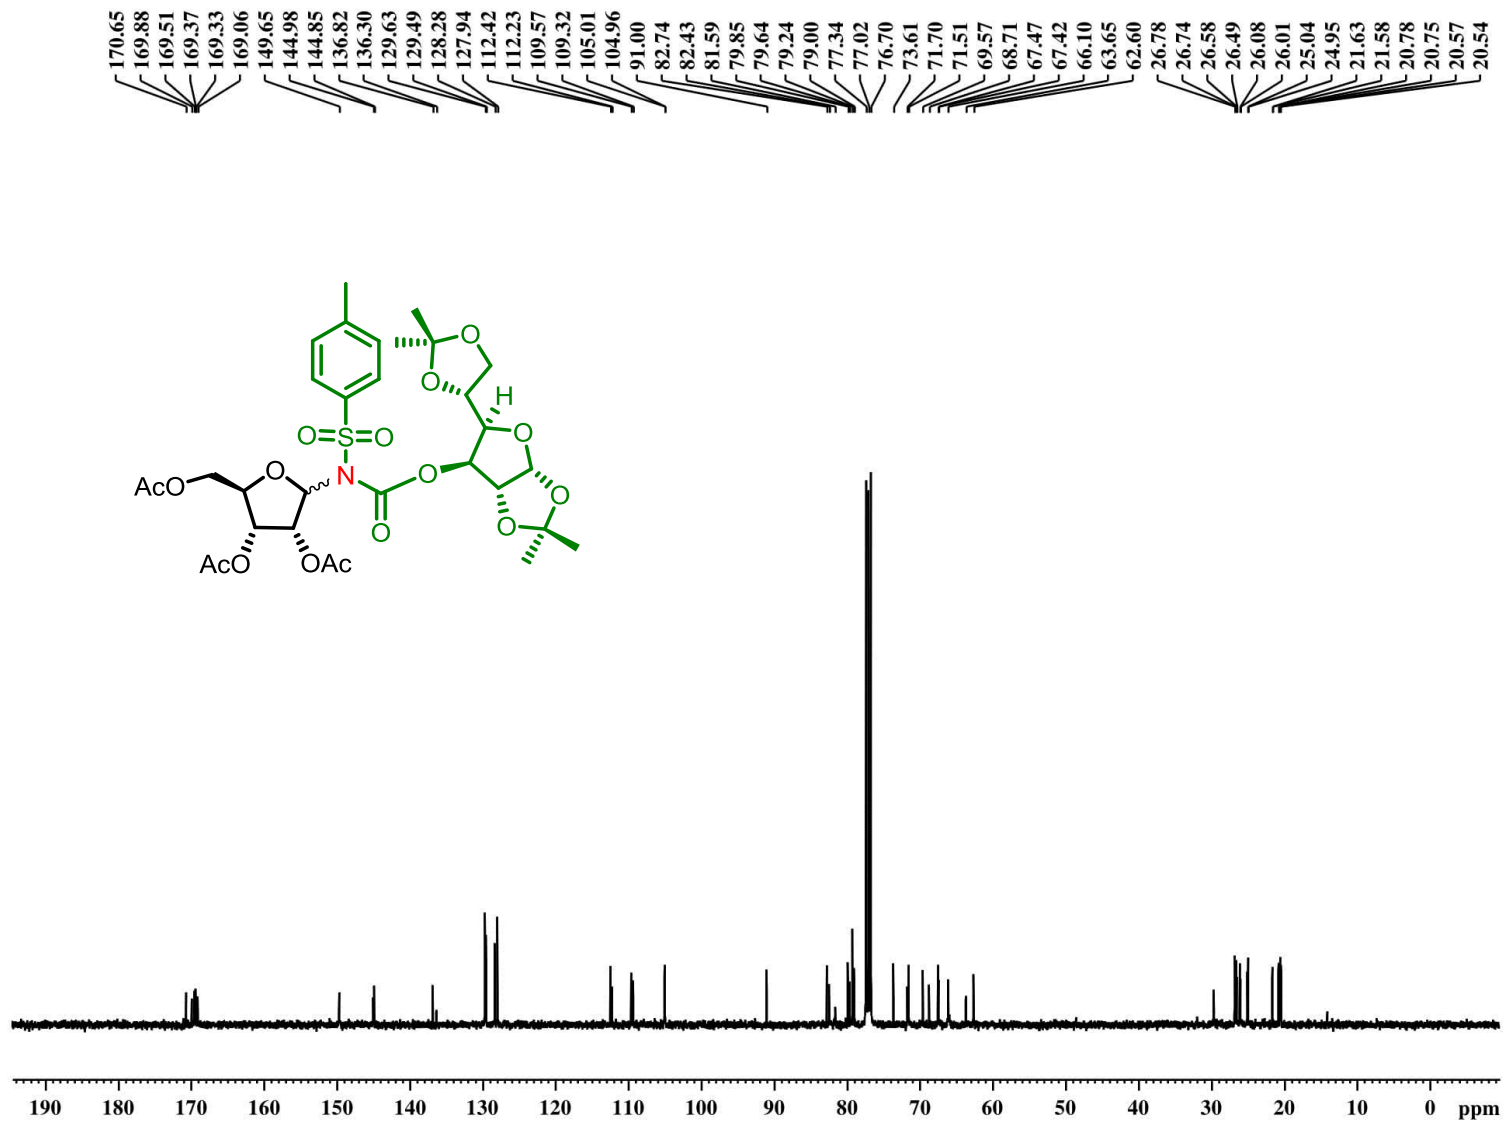

<sup>13</sup>C NMR spectrum of **3aa** (100 MHz, MHz, CDCl<sub>3</sub>)

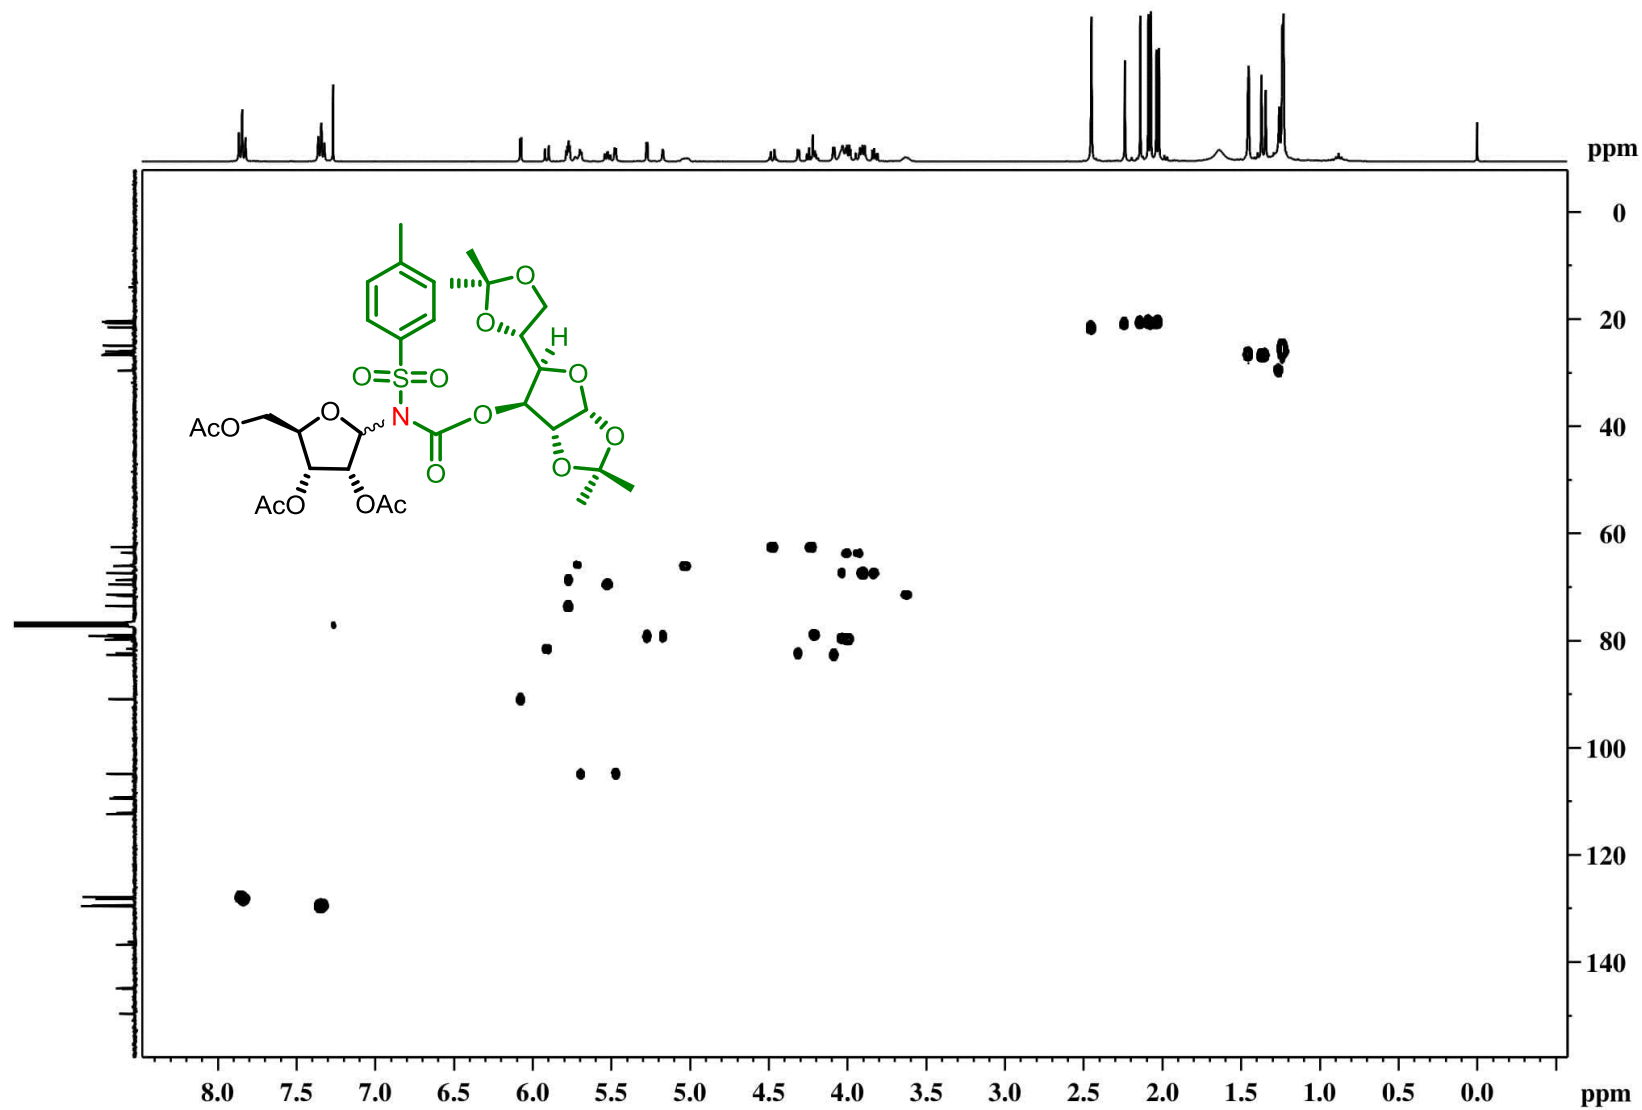

2D HSQC spectrum of **3aa** ( $\text{CDCl}_3$ ).

## SAIF [HRMS Report]

Data File: HRMS20I18MAR15  
Sample ID: PKM-ARG-01  
Acquisition Date: 03/18/20 12:00:57 PM  
Vial: CStk1-01:15

Original Data Path: D:\INTERNALS\2020\Mar2020  
Sample Name:  
Run Time(min): 0.00  
Injection Volume(ul): 1.00

HRMS20I18MAR15 #15-28 RT: 0.11-0.21 AV: 14 SB: 1 0.01 NL: 1.28E7  
T: FTMS + p ESI Full ms [100.00-1500.00]

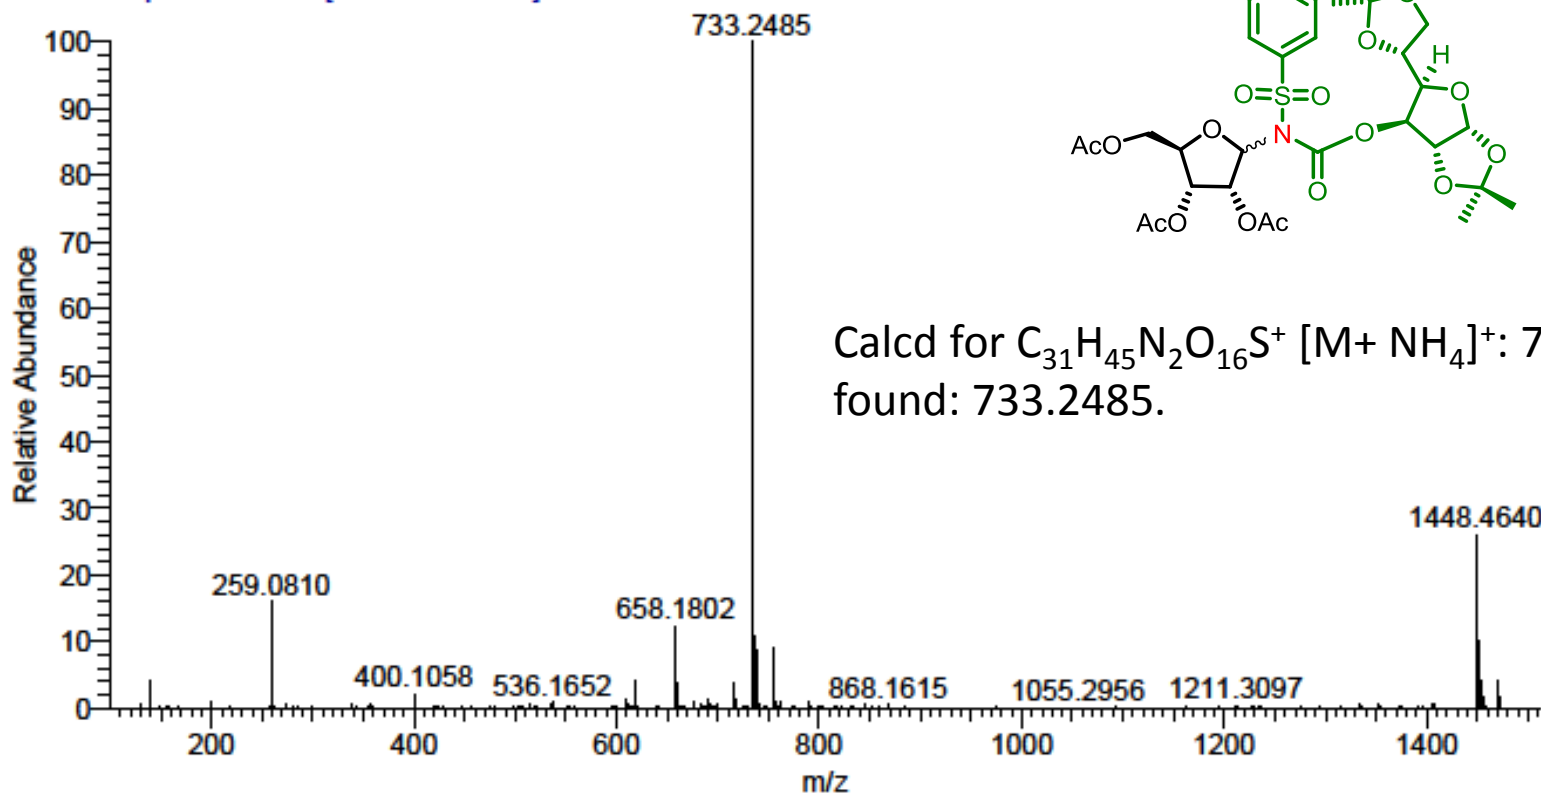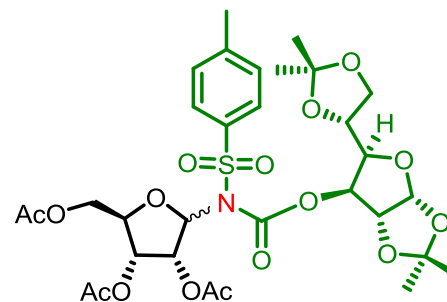

HRMS of 3aa

## 8. Spectra Data, HRMS of compounds **4, 5, 6**



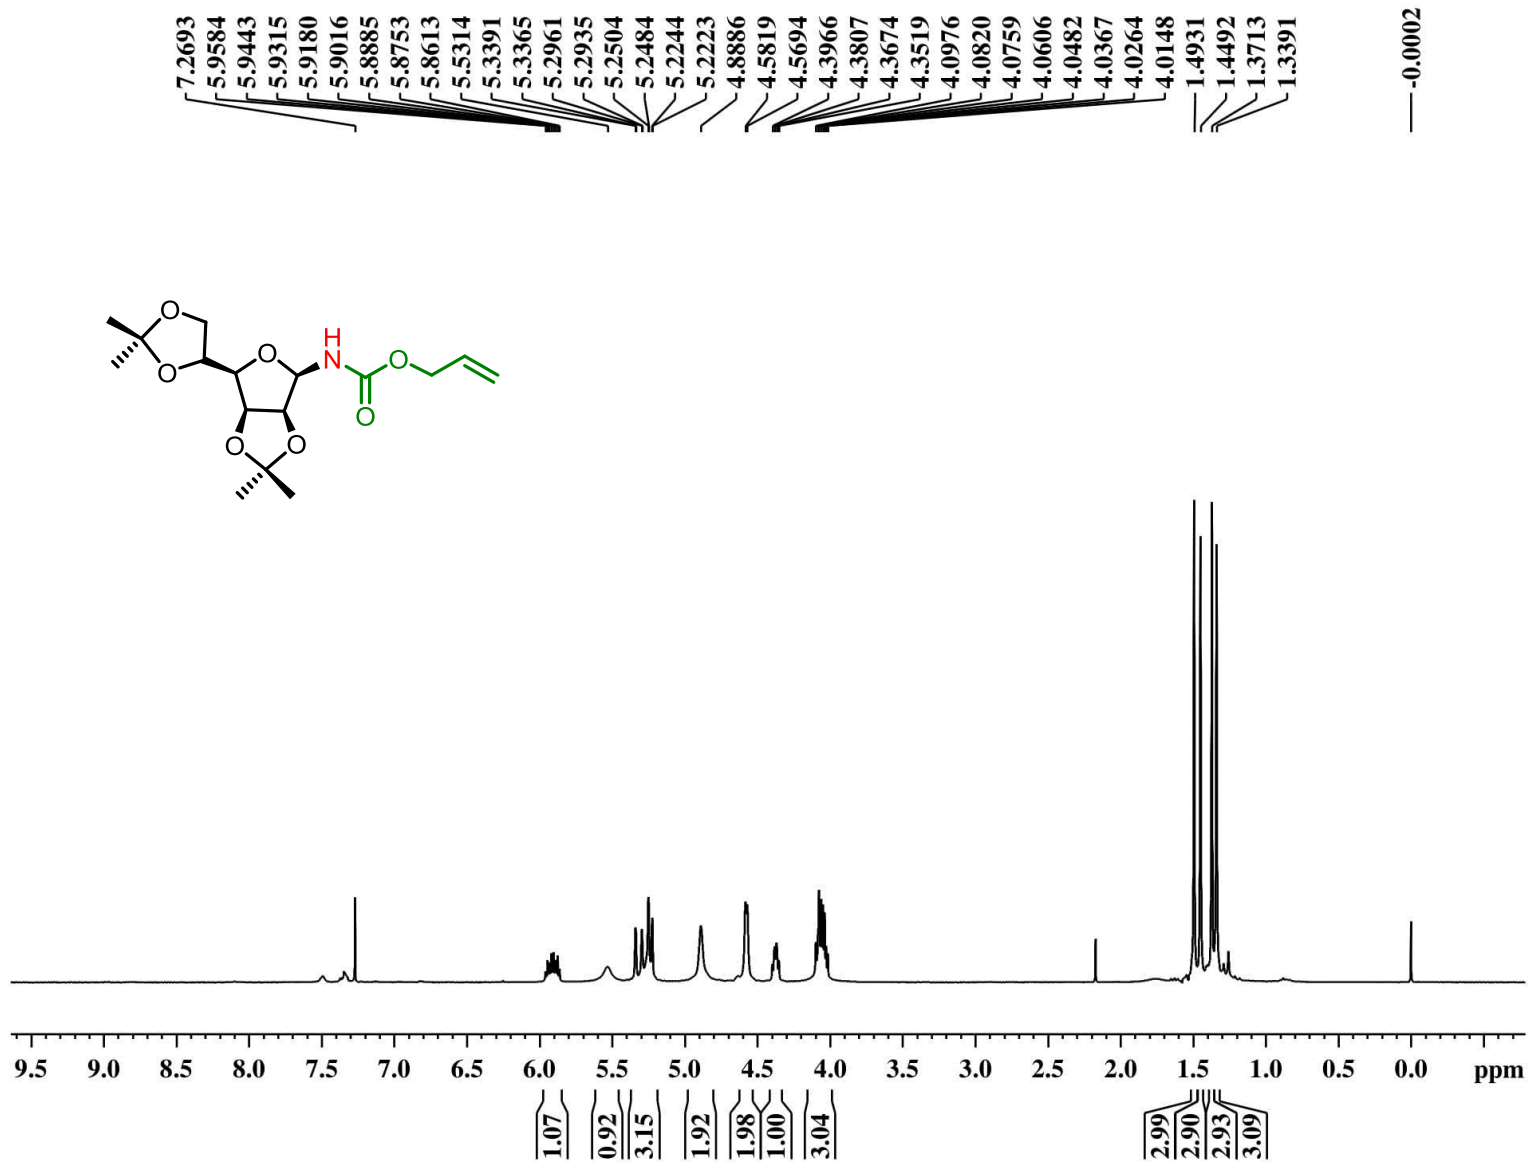

$^1\text{H}$  NMR spectrum of **4** (400 MHz,  $\text{CDCl}_3$ )

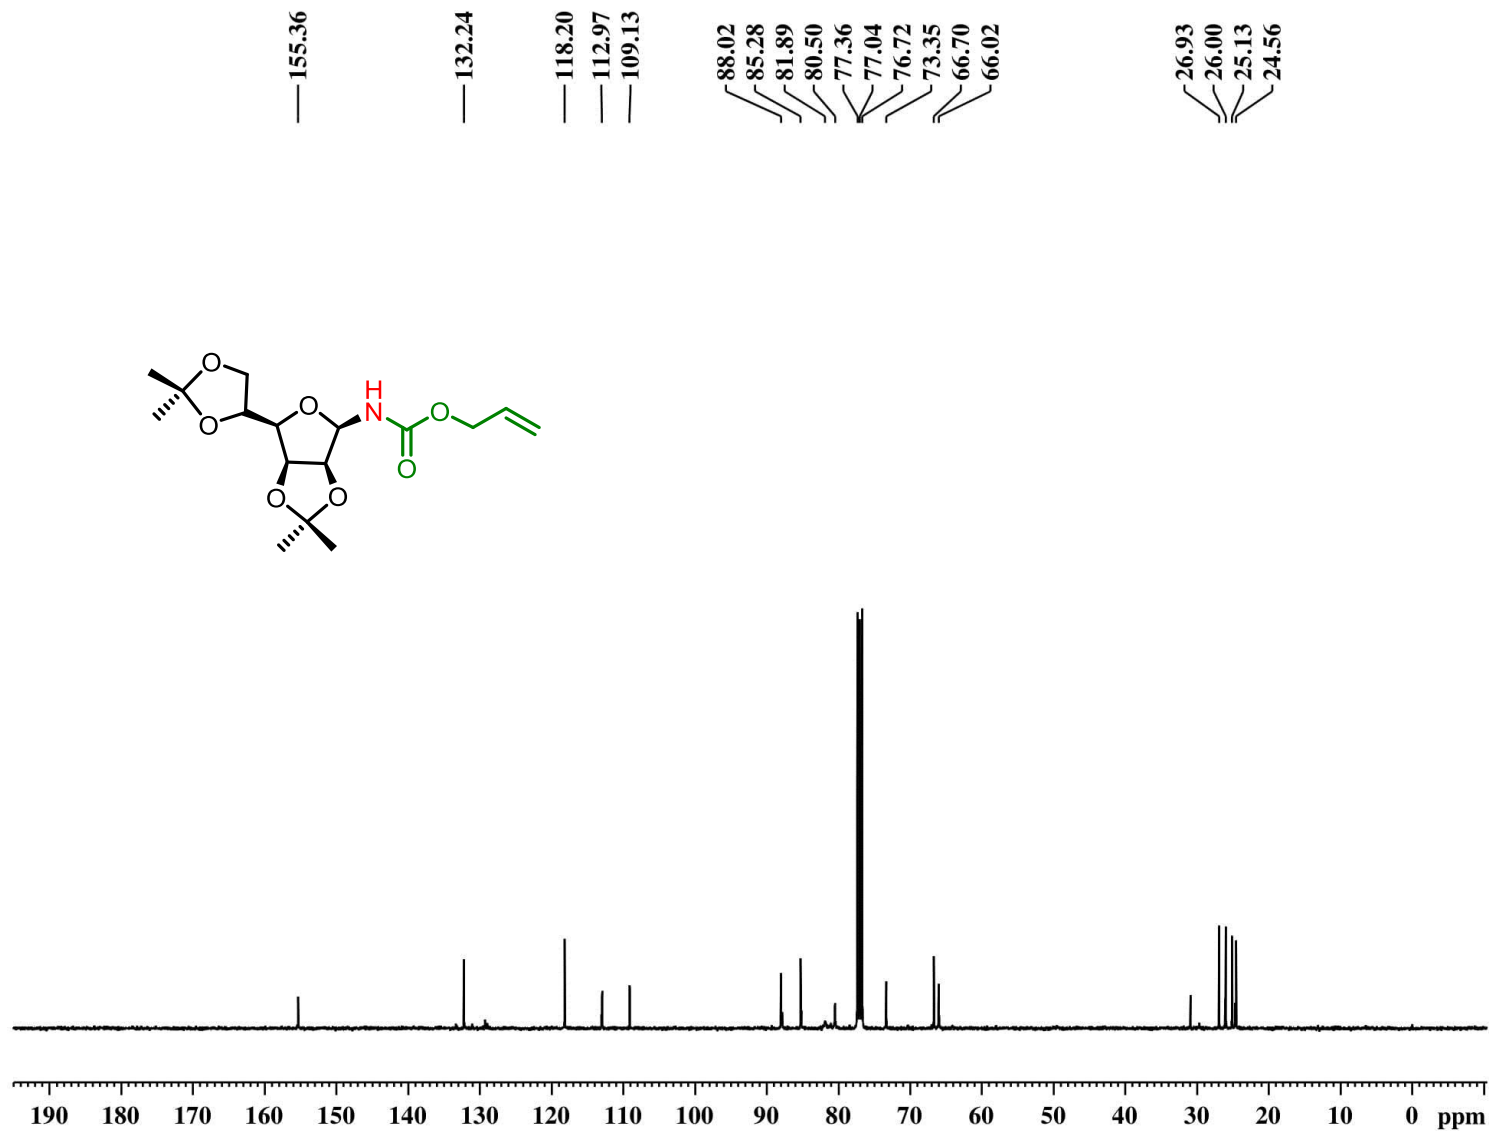

$^{13}\text{C}$  NMR spectrum of **4** (100 MHz,  $\text{CDCl}_3$ )

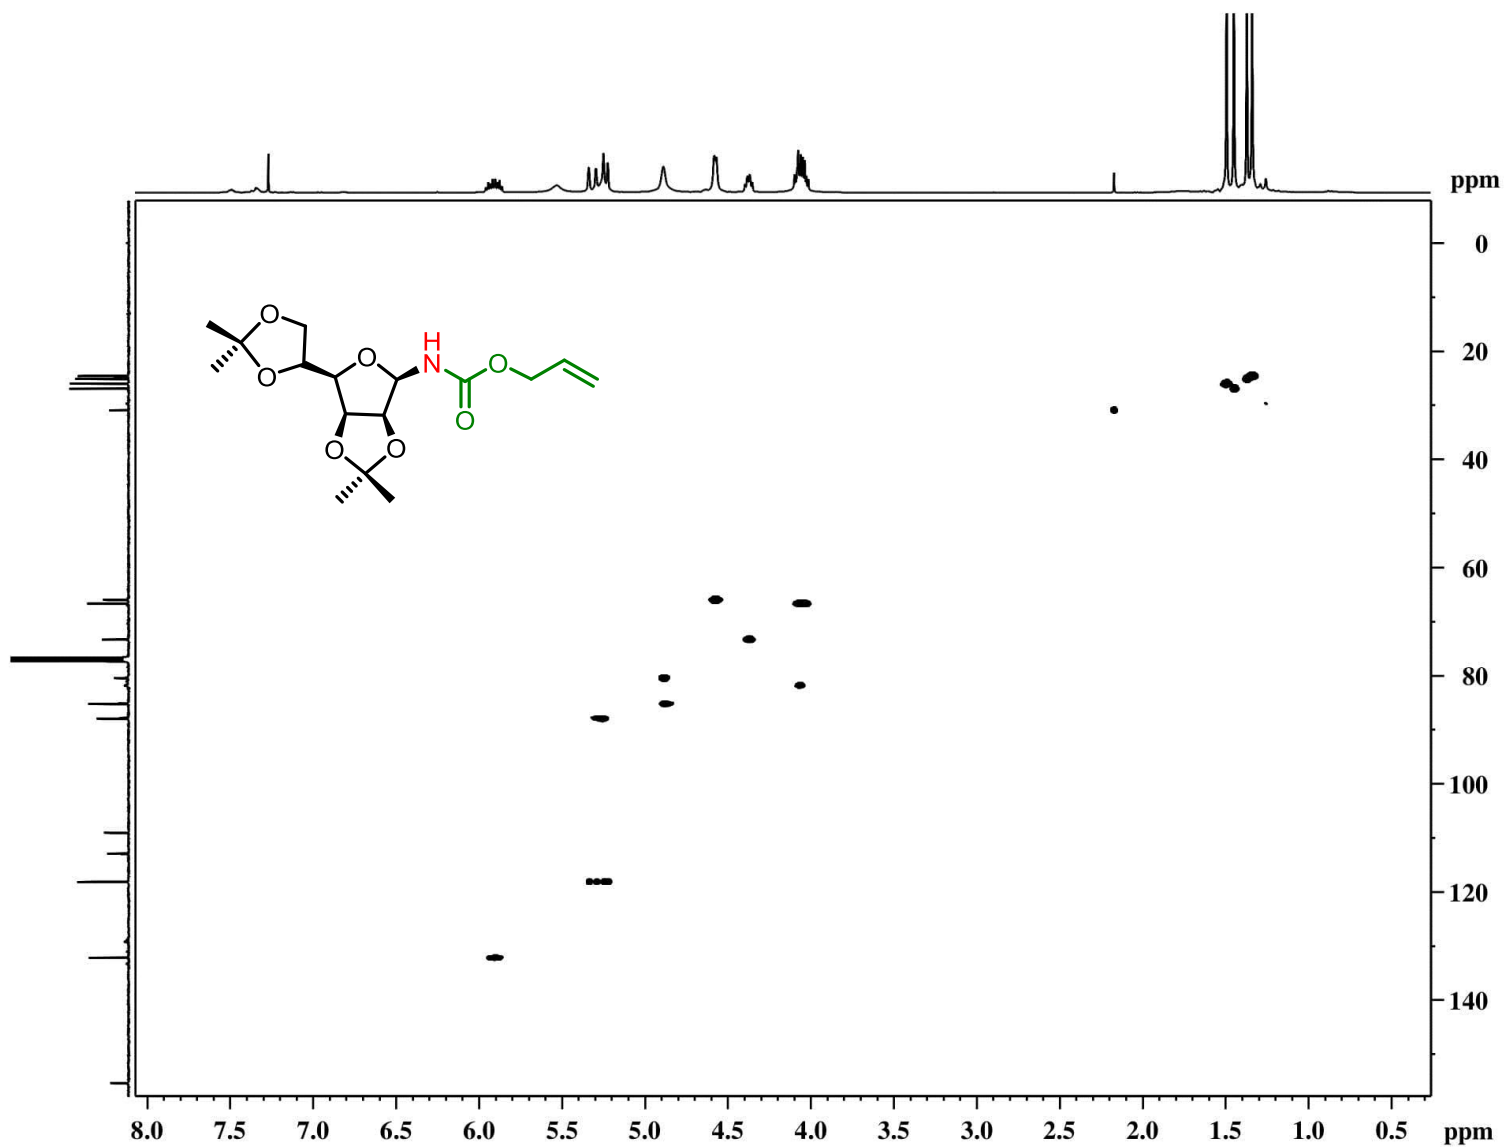

2D HSQC spectrum of **4** (CDCl<sub>3</sub>).

## SAIF [HRMS Report]

|                   |                      |                       |                                  |
|-------------------|----------------------|-----------------------|----------------------------------|
| Data File:        | HRMS20101DEC09       | Original Data Path:   | D:\INTERNAL NEW\2020\DEC<br>2020 |
| Sample ID:        | PKM-DP-05            | Sample Name:          |                                  |
| Acquisition Date: | 12/01/20 01:01:22 PM | Run Time(min):        | 0.00                             |
| Vial:             | CStk1-01:9           | Injection Volume(μl): | 1.00                             |

HRMS20101DEC09 #29-61 RT: 0.25-0.50 AV: 33 SB: 1 0.00 NL: 1.18E6  
T: FTMS + p ESI Full ms [150.00-1500.00]

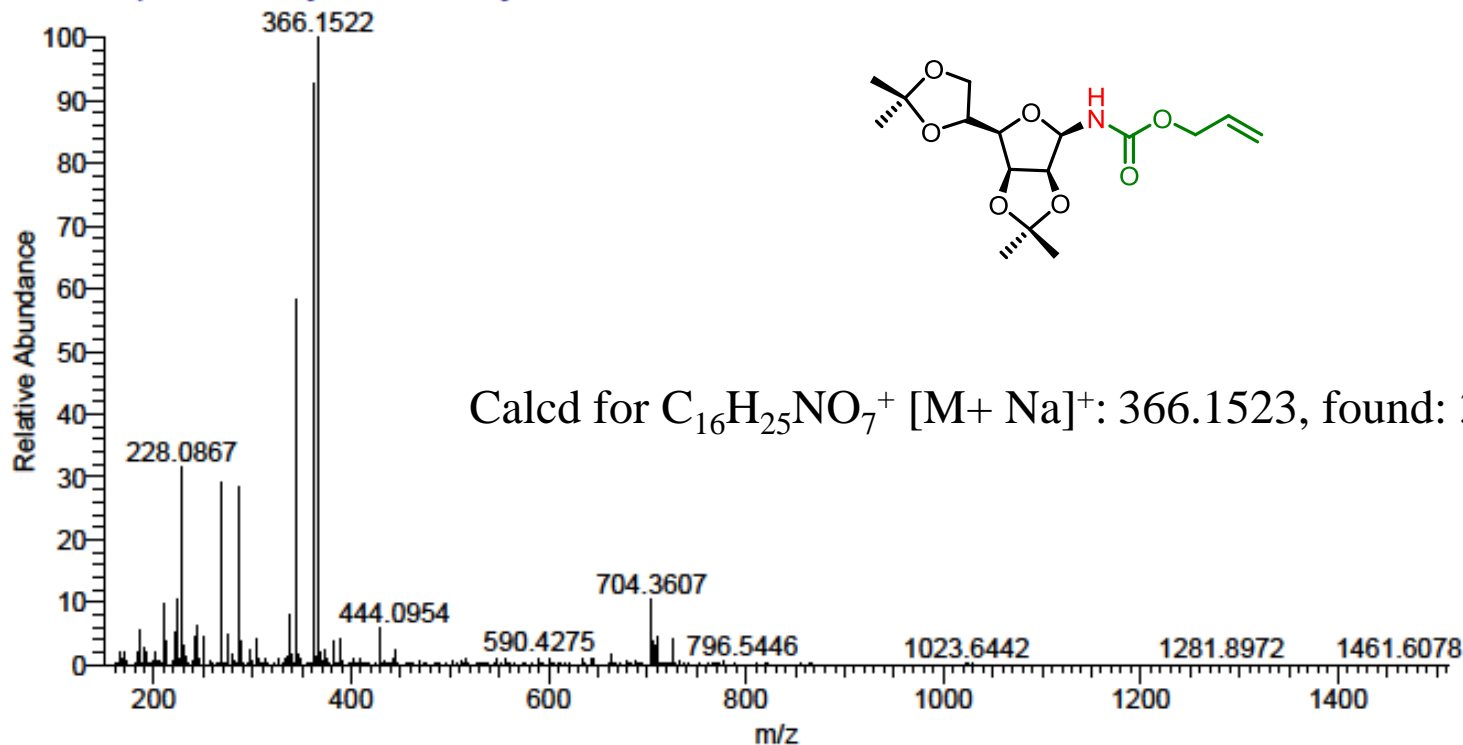

HRMS of 4

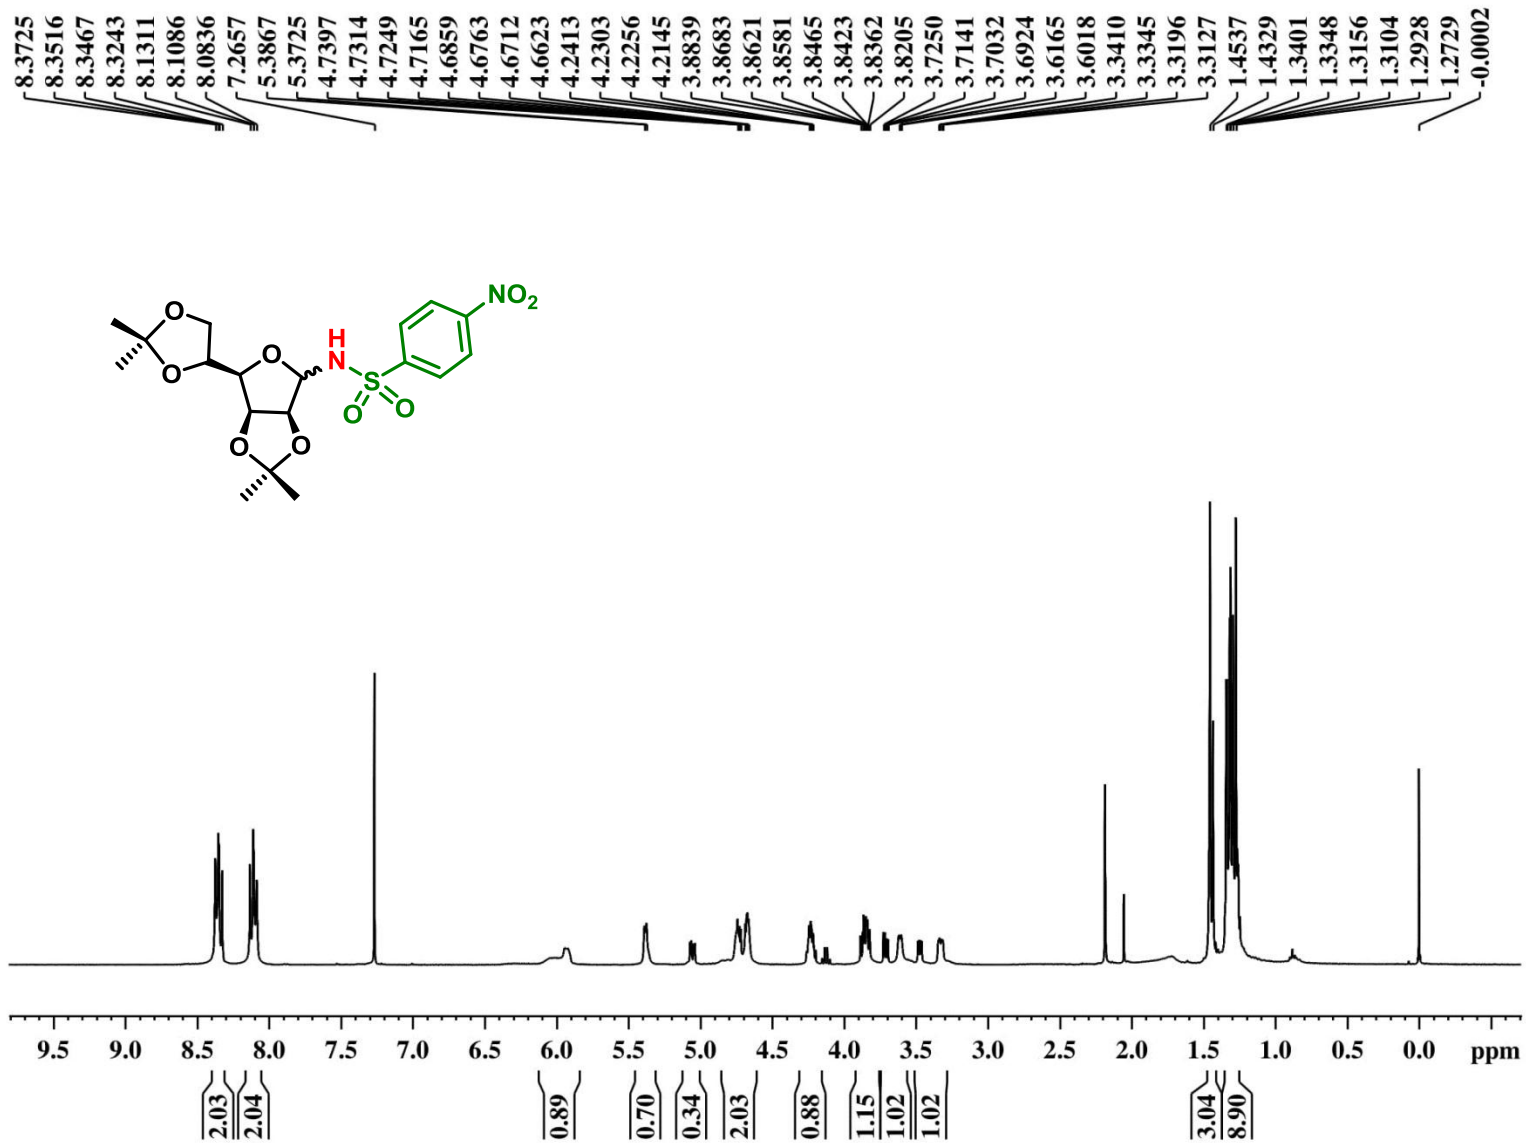

<sup>1</sup>H NMR spectrum of **5** (400 MHz, CDCl<sub>3</sub>)

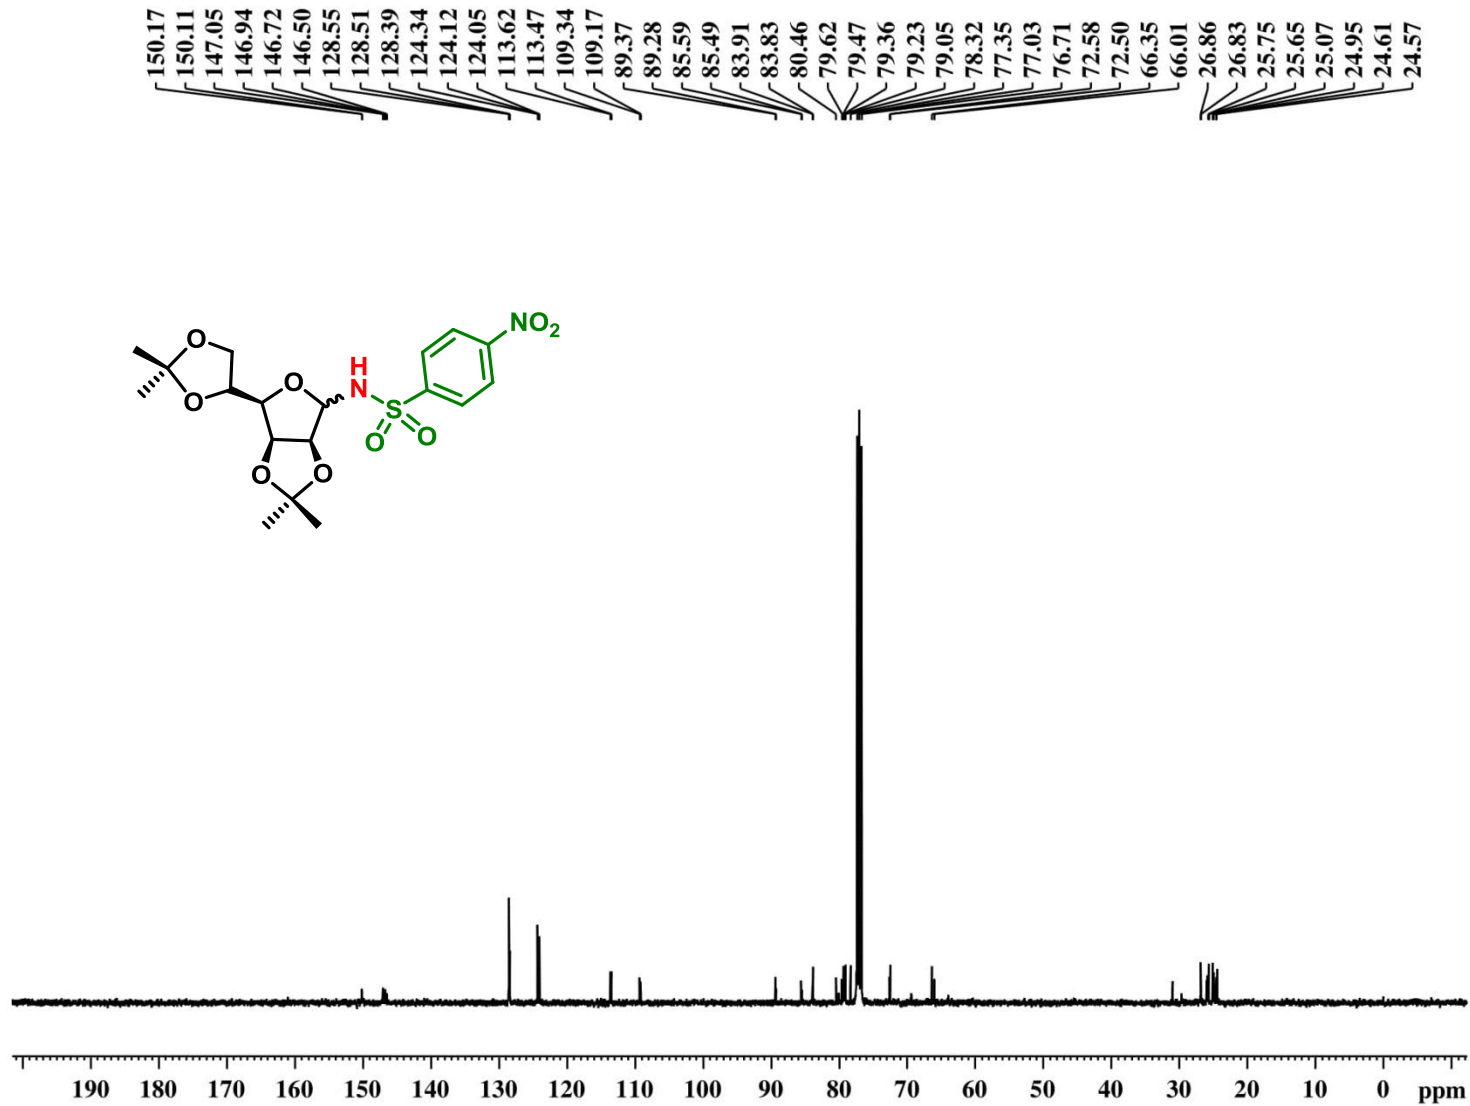

<sup>13</sup>C NMR spectrum of 5 (100 MHz, MHz, CDCl<sub>3</sub>)

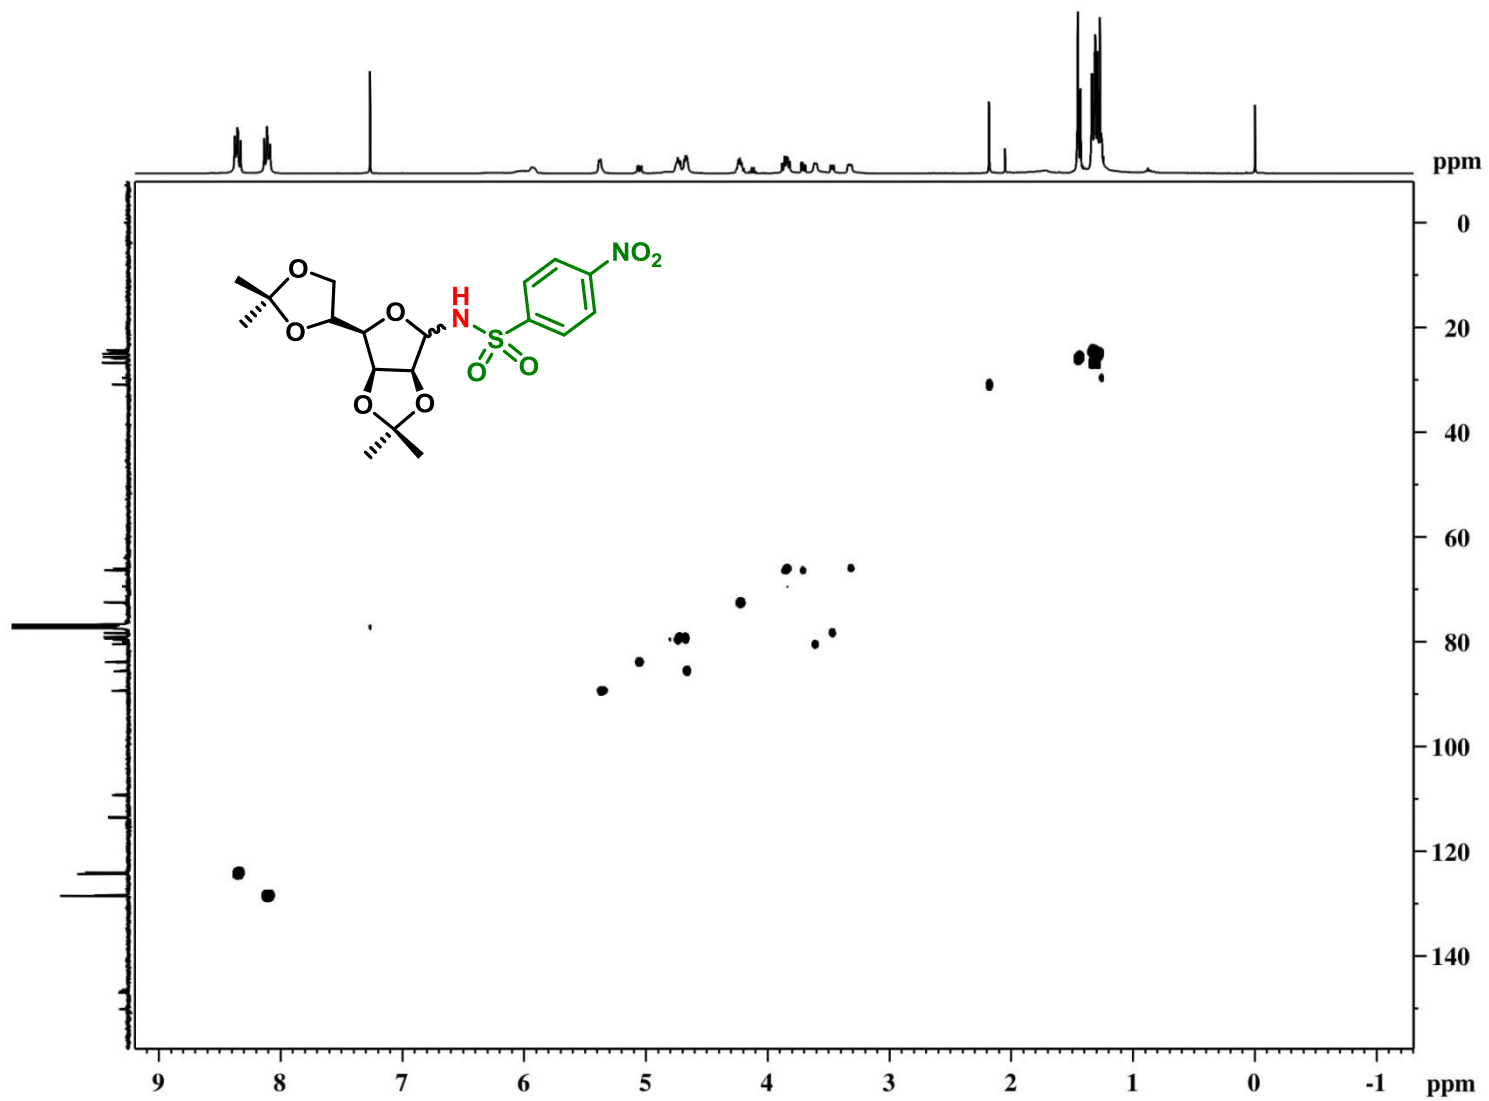

2D HSQC spectrum of **5**(CDCl<sub>3</sub>).

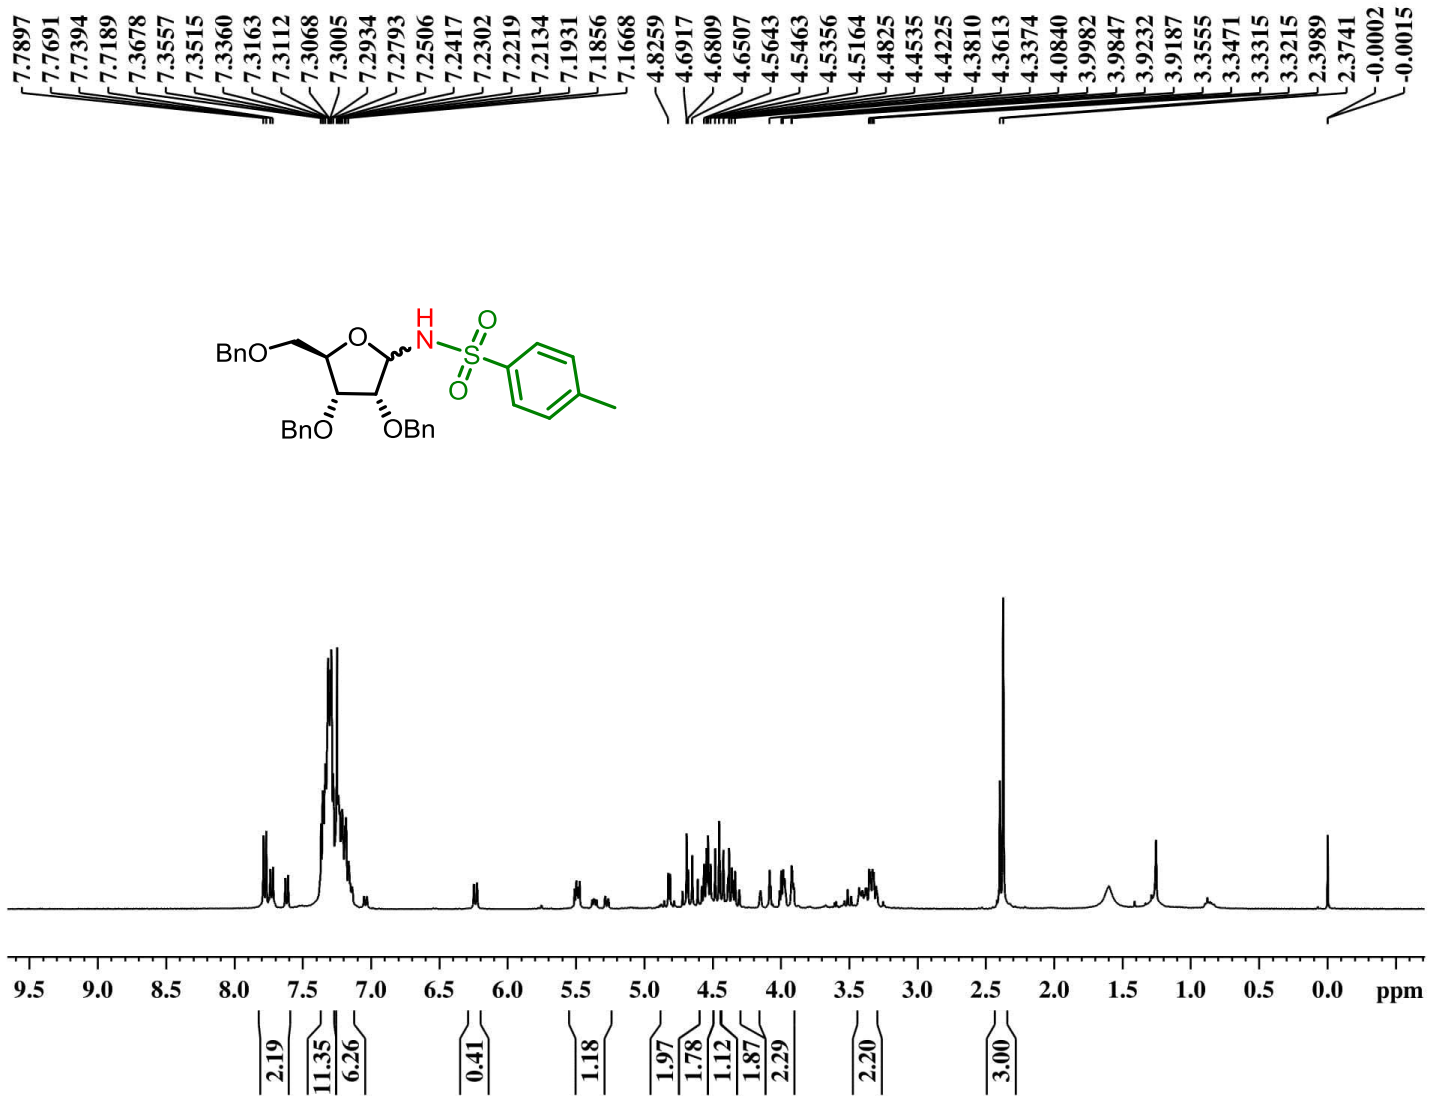

<sup>1</sup>H NMR spectrum of **6** (400 MHz, CDCl<sub>3</sub>)



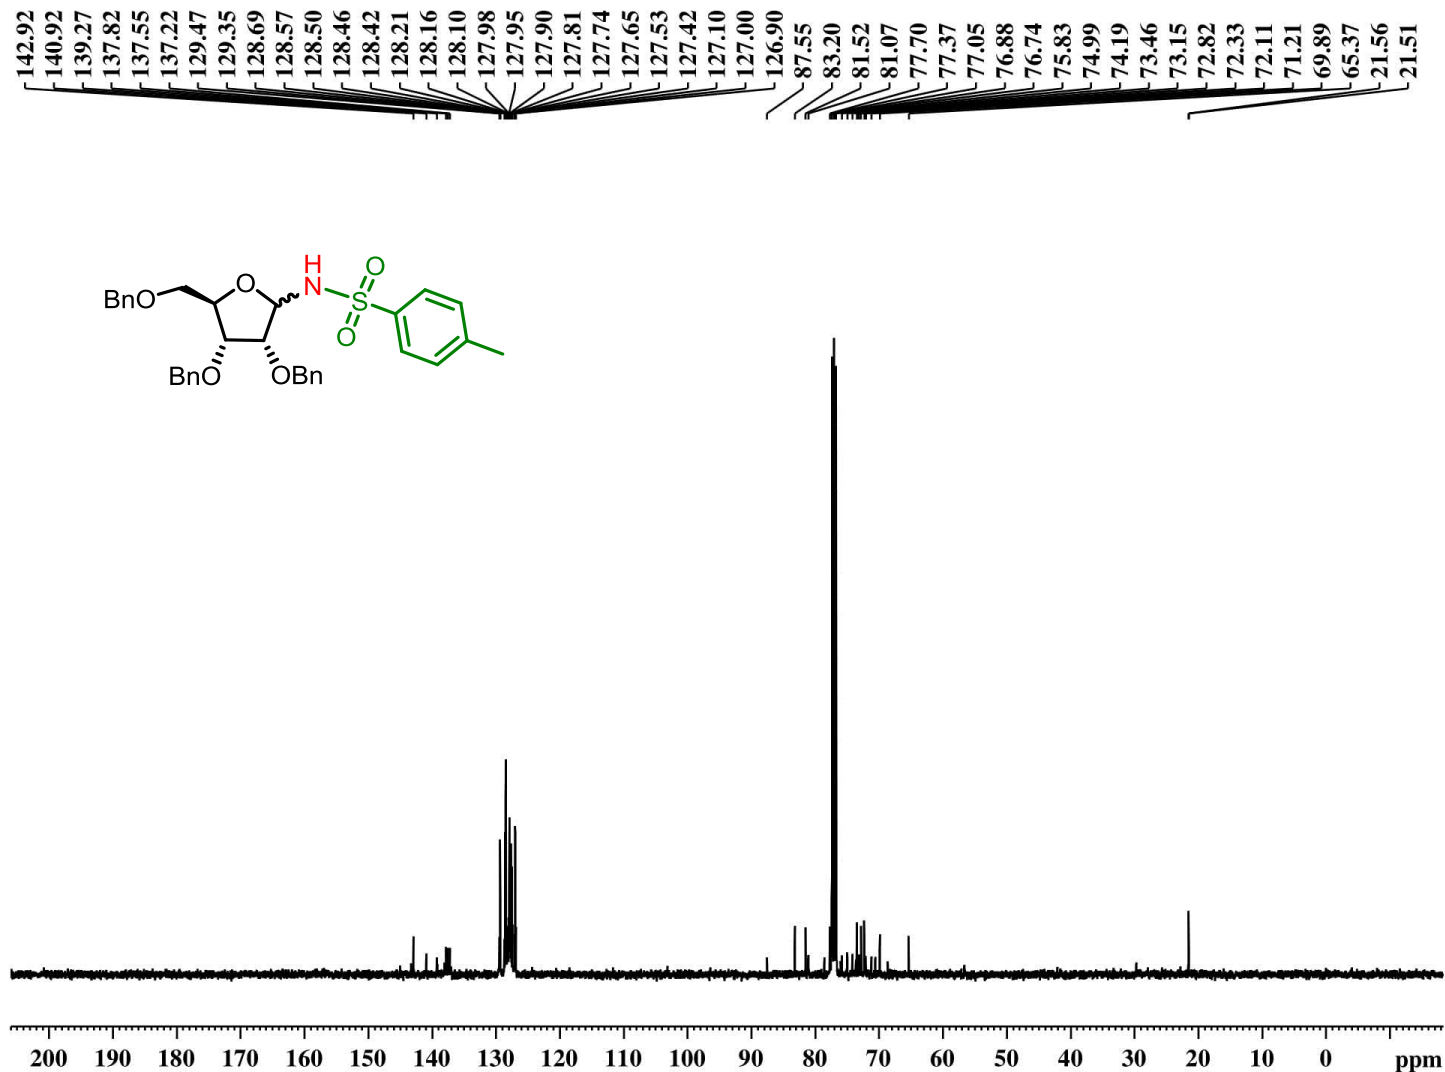

$^{13}\text{C}$  NMR spectrum of **6** (100 MHz,  $\text{CDCl}_3$ )

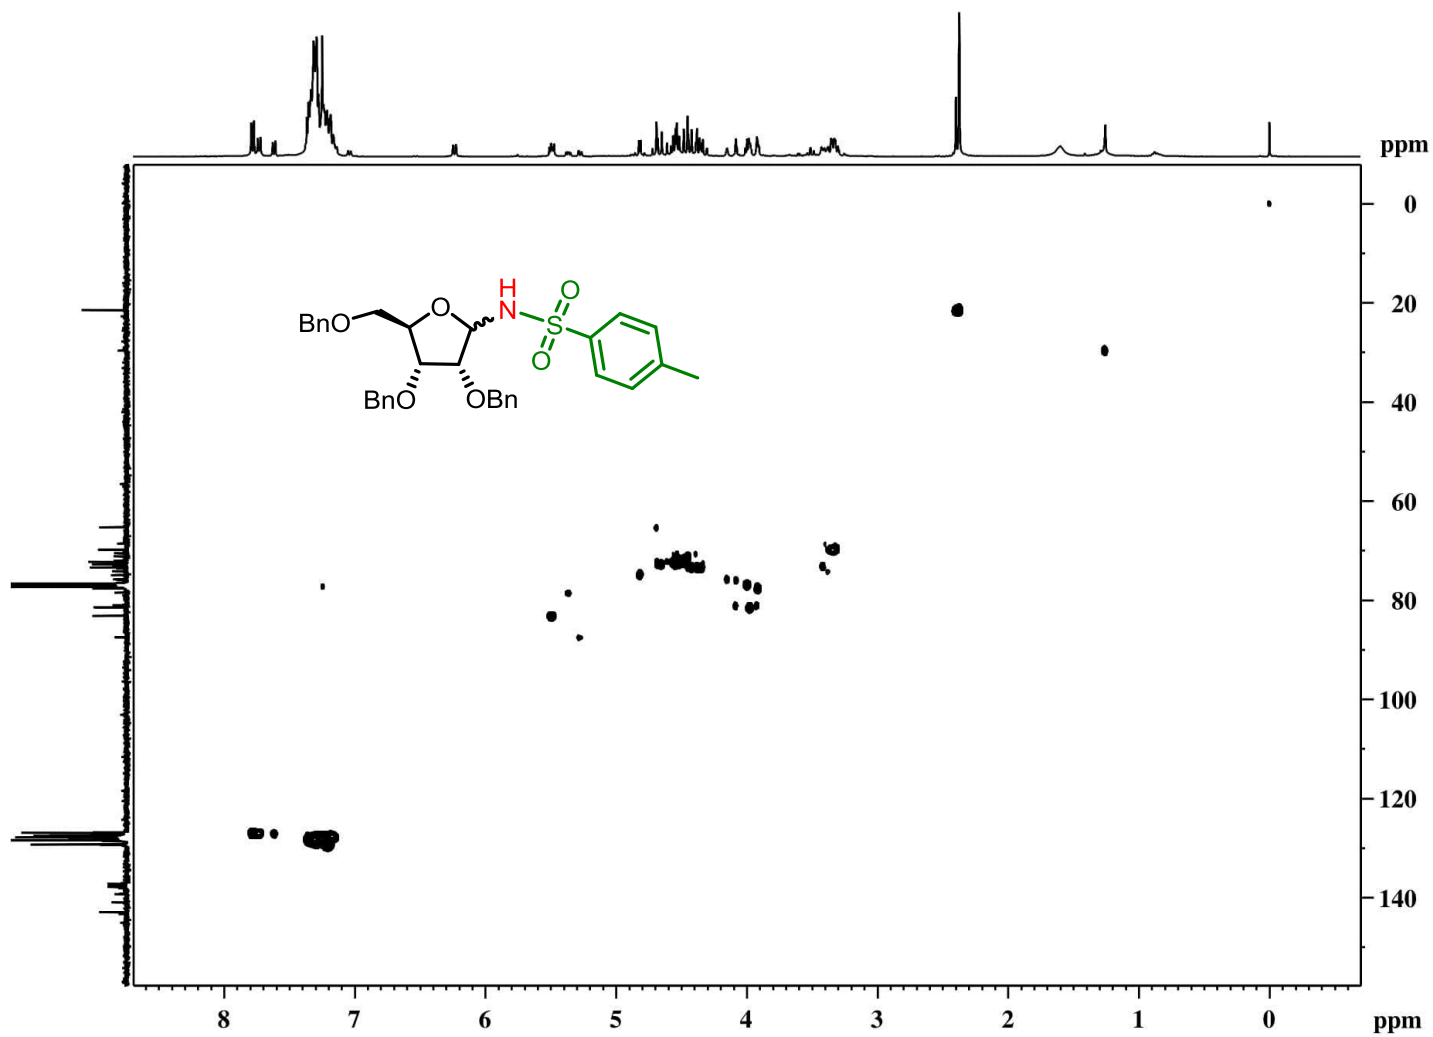

2D HSQC spectrum of **6** ( $\text{CDCl}_3$ ).

## SAIF [HRMS Report]

|                   |                      |                       |                                  |
|-------------------|----------------------|-----------------------|----------------------------------|
| Data File:        | HRMS20I09NOV03       | Original Data Path:   | D:\INTERNAL NEW\2020\NOV<br>2020 |
| Sample ID:        | PKM-DP-03            | Sample Name:          |                                  |
| Acquisition Date: | 11/09/20 11:00:45 AM | Run Time(min):        | 0.00                             |
| Vial:             | CSfk1-01:3           | Injection Volume(μl): | 1.00                             |

HRMS20I09NOV03 #13-24 RT: 0.11-0.21 AV: 12 SB: 1 0.00 NL: 6.86E4  
T: FTMS + p ESI Full ms [150.00-1500.00]

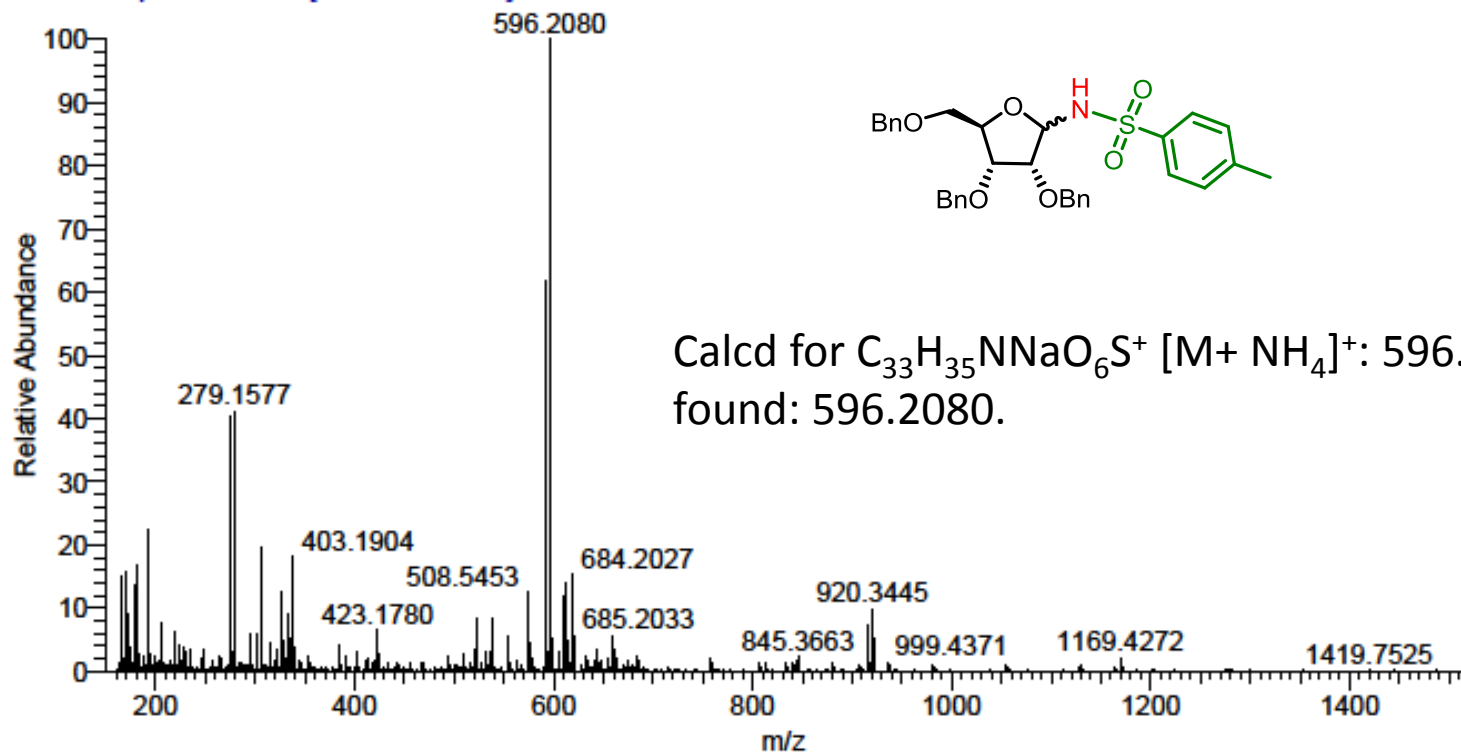

Supplement: d1nj02051j1.pdf [file d1nj02051j1.pdf]
